# Supplementary material for: Comparative genome analyses reveal the unique genetic composition and selection signals underlying the phenotypic characteristics of three Chinese domestic goat breeds
Source: Genet Sel Evol. 2019 Nov 26;51:70. doi: 10.1186/s12711-019-0512-4 (PMC6880376; doi:10.1186/s12711-019-0512-4)
Supplement: Supplementary file 2 — Additional file 2: Table S1. Summary of mapping statistics for the three Chinese goat breeds that were sequenced in this study. [file 12711_2019_512_MOESM2_ESM.xlsx]

## Sheet: S1
Table S1 Summary of mapping statistics for the three Chinese goat breeds that were sequenced in this study
Breeds	Sample location	Sequencing platform	Sequecing mode	Raw reads	Clean reads	Mapped reads	Mapping ratio (%)	Genome coverage (%)	Sequence depth (×)
Tibetan Cashmere	Cuoqin county	Illumina HiSeq X10	2 × 150	176557084	170577254	170247042	99.81	99.42	9.56
Tibetan Cashmere	Cuoqin county	Illumina HiSeq X10	2 × 150	154293408	149393746	149262804	99.91	99.17	8.39
Tibetan Cashmere	Cuoqin county	Illumina HiSeq X10	2 × 150	153908138	141282792	141114595	99.88	99.09	7.78
Tibetan Cashmere	Cuoqin county	Illumina HiSeq X10	2 × 150	138641984	126966130	126802627	99.87	98.82	6.99
Tibetan Cashmere	Cuoqin county	Illumina HiSeq X10	2 × 150	143547094	130285226	130112286	99.87	98.92	7.15
Tibetan Cashmere	Cuoqin county	Illumina HiSeq X10	2 × 150	154731486	140821186	140569141	99.82	99.09	7.74
Tibetan Cashmere	Cuoqin county	Illumina HiSeq X10	2 × 150	177969356	163237782	162810131	99.74	99.27	8.97
Tibetan Cashmere	Cuoqin county	Illumina HiSeq X10	2 × 150	153243368	139864214	139628272	99.83	99.08	7.69
Tibetan Cashmere	Cuoqin county	Illumina HiSeq X10	2 × 150	146225762	132876432	132631210	99.82	98.91	7.29
Tibetan Cashmere	Cuoqin county	Illumina HiSeq X10	2 × 150	158227692	143426164	143233067	99.87	99.11	7.88
Tibetan Cashmere	Cuoqin county	Illumina HiSeq X10	2 × 150	172071028	155646746	155340286	99.8	99.24	8.53
Tibetan Cashmere	Cuoqin county	Illumina HiSeq X10	2 × 150	177670258	164470002	164117705	99.79	99.3	9.07
Tibetan Cashmere	Cuoqin county	Illumina HiSeq X10	2 × 150	154153266	140141328	139881675	99.81	99.07	7.69
Tibetan Cashmere	Cuoqin county	Illumina HiSeq X10	2 × 150	142761798	131123738	130893294	99.82	98.9	7.21
Chengdu Brown	Dayi county	BGISEQ-500	2 × 100	203970640	186731096	186265169	99.7505	99.06	7.03
Chengdu Brown	Dayi county	BGISEQ-500	2 × 100	205488718	183078614	182654740	99.7685	99.05	6.88
Chengdu Brown	Dayi county	BGISEQ-500	2 × 100	203810884	183427448	183005111	99.7698	99.06	6.89
Chengdu Brown	Dayi county	BGISEQ-500	2 × 100	206579568	185754310	185288257	99.7491	99.03	6.98
Chengdu Brown	Dayi county	BGISEQ-500	2 × 100	205001148	184710308	184253586	99.7527	98.76	6.94
Chengdu Brown	Dayi county	BGISEQ-500	2 × 100	204603186	185349690	184908220	99.7618	99.03	6.97
Chengdu Brown	Dayi county	BGISEQ-500	2 × 100	206061032	186171508	185784787	99.7923	99.07	7
Chengdu Brown	Dayi county	BGISEQ-500	2 × 100	203343354	185608092	185155634	99.7562	99.04	6.99
Chengdu Brown	Dayi county	BGISEQ-500	2 × 100	205942690	186669094	186253789	99.7775	99.12	7.02
Chengdu Brown	Dayi county	BGISEQ-500	2 × 100	205881866	185577866	185119593	99.7531	99.06	6.98
Chengdu Brown	Dayi county	BGISEQ-500	2 × 100	203351262	185434424	184996062	99.7636	99.04	6.98
Chengdu Brown	Dayi county	BGISEQ-500	2 × 100	203431940	186328724	185880521	99.7595	99.06	7.02
Chengdu Brown	Dayi county	BGISEQ-500	2 × 100	203389758	186226352	185839950	99.7925	99.09	7.02
Chengdu Brown	Dayi county	BGISEQ-500	2 × 100	204375024	188534336	188194333	99.8197	99.12	7.11
Chengdu Brown	Dayi county	BGISEQ-500	2 × 100	205187688	187513600	187149657	99.8059	99.14	7.07
Jintang Black	Jintang county	BGISEQ-500	2 × 100	202131762	188080610	187666020	99.7796	99	7.1
Jintang Black	Jintang county	BGISEQ-500	2 × 100	207181258	191870132	191412271	99.7614	99.12	7.24
Jintang Black	Jintang county	BGISEQ-500	2 × 100	204063934	186958730	186532015	99.7718	99.09	7.05
Jintang Black	Jintang county	BGISEQ-500	2 × 100	203049550	188206860	187715777	99.7391	99.03	7.1
Jintang Black	Jintang county	BGISEQ-500	2 × 100	205403302	191575668	191141069	99.7731	99.15	7.24
Jintang Black	Jintang county	BGISEQ-500	2 × 100	205571908	191454216	191007139	99.7665	99.07	7.23
Jintang Black	Jintang county	BGISEQ-500	2 × 100	205406934	183856810	183403649	99.7535	99.04	6.93
Jintang Black	Jintang county	BGISEQ-500	2 × 100	205342294	181484700	181021719	99.7449	99.02	6.83
Jintang Black	Jintang county	BGISEQ-500	2 × 100	202669748	181006736	180611886	99.7819	98.82	6.81
