# Supplementary material for: Comparative genome analyses reveal the unique genetic composition and selection signals underlying the phenotypic characteristics of three Chinese domestic goat breeds
Source: Genet Sel Evol. 2019 Nov 26;51:70. doi: 10.1186/s12711-019-0512-4 (PMC6880376; doi:10.1186/s12711-019-0512-4)
Supplement: Supplementary file 3 — Additional file 3: Table S2. Summary of mapping statistics for the downloaded goat genome sequence data. [file 12711_2019_512_MOESM3_ESM.xlsx]

## Sheet: S2
Table S2 Summary of mapping statistics for the downloaded goat genome sequence data
Breeds	Sample location	Raw reads	Clean reads	Mapped reads	Mapping ratio (%)	Genome coverage (%)	Sequence depth (×)
Bezoar ibex	Iran	380079022	342122930	341198283	99.7297	99.7	12.75
Bezoar ibex	Iran	351169770	320363994	319603279	99.7625	99.68	11.96
Bezoar ibex	Iran	383560122	270983696	270378395	99.7766	99.6	10.07
Bezoar ibex	Iran	344511740	313284138	312524416	99.7575	99.67	11.82
Bezoar ibex	Iran	369728724	337307700	335269211	99.3957	99.69	12.58
Bezoar ibex	Iran	327495634	302518848	301803913	99.7637	99.64	11.34
Bezoar ibex	Iran	386962886	346557394	344659067	99.4522	99.68	12.83
Bezoar ibex	Iran	452889130	409835970	409627763	99.9492	99.41	15.39
Bezoar ibex	Iran	461559294	409861752	394693377	96.2991	99.45	14.8
Bezoar ibex	Iran	218591158	198945870	197505908	99.2762	99.42	7.47
Bezoar ibex	Iran	196332996	158984724	158621529	99.7716	98.84	5.95
Bezoar ibex	Iran	193532550	156846564	156410678	99.7221	98.8	5.87
Bezoar ibex	Iran	193714422	159409674	159035391	99.7652	98.76	5.97
Bezoar ibex	Iran	200122588	178606114	178132907	99.7351	99.14	6.69
Bezoar ibex	Iran	198286884	160990468	160545712	99.7237	98.77	6.02
Bezoar ibex	Iran	435911496	398190190	397908410	99.9292	99.72	15.06
Bezoar ibex	Iran	342355712	255013432	254351591	99.7405	99.59	9.58
Bezoar ibex	Iran	359112488	318245396	312993784	98.3498	99.68	11.76
Bezoar ibex	Iran	386164878	348866170	348249761	99.8233	99.66	12.97
Bezoar ibex	Iran	172502922	153933222	153478543	99.7046	98.39	5.76
Bezoar ibex	Iran	154783040	139583112	139107561	99.6593	98.4	5.25
Saanen	France	410073104	341251774	340307830	99.7234	99.43	12.77
Saanen	France	400622612	368723062	367740691	99.7336	99.49	13.95
Alpine	France	438481730	393511812	390457393	99.2238	99.51	14.79
Alpine	France	416179438	381677140	380631995	99.7262	99.49	14.44
Shaanbei Cashmere	China	177024814	161610164	161078681	99.6711	97.77	8.74
Shaanbei Cashmere	China	194526590	178334574	177793077	99.6964	98.28	9.65
Shaanbei Cashmere	China	197202062	176267100	175375822	99.4944	98.23	9.59
Shaanbei Cashmere	China	177263906	151052238	149964223	99.2797	95.86	8.08
Draa	Morocco	412685676	357430216	356456865	99.7277	99.69	13.16
Draa	Morocco	404792952	363797806	362734433	99.7077	99.45	13.64
Draa	Morocco	388983100	361741504	360905739	99.769	99.52	13.64
Draa	Morocco	441442386	383511368	382391760	99.7081	99.5	14.31
Draa	Morocco	411834096	379743652	378747938	99.7378	99.5	14.18
Draa	Morocco	397976820	369070934	368192759	99.7621	99.53	13.92
Draa	Morocco	460698382	416666728	415787727	99.789	99.54	15.55
Draa	Morocco	375663252	352241268	351438376	99.7721	99.5	13.25
Draa	Morocco	397636084	368095756	367193545	99.7549	99.53	13.88
Draa	Morocco	399847620	372543388	371890311	99.8247	99.72	14.09
Draa	Morocco	476084698	424491472	423502538	99.767	99.52	15.9
Draa	Morocco	428120116	393876606	392870734	99.7446	99.5	14.84
Draa	Morocco	369775404	346414234	345436072	99.7176	99.52	13.07
Draa	Morocco	437549628	401225094	400380300	99.7894	99.72	15.08
Moroccan Northern	Morocco	477339190	391582824	390429262	99.7054	99.47	14.44
Moroccan Northern	Morocco	355209198	319480262	318589360	99.7211	99.49	11.96
Moroccan Northern	Morocco	318678902	285593010	284812226	99.7266	99.48	10.69
Moroccan Northern	Morocco	362295668	330104174	329209558	99.729	99.52	12.36
Moroccan Northern	Morocco	414000250	362604012	361337456	99.6507	99.48	13.43
Moroccan Northern	Morocco	419066738	366153246	365070520	99.7043	99.48	13.6
Moroccan Northern	Morocco	393581612	348141042	347000591	99.6724	99.5	12.93
Moroccan Northern	Morocco	392164676	351150278	350227748	99.7373	99.7	13.02
