# Supplementary material for: Comparative genome analyses reveal the unique genetic composition and selection signals underlying the phenotypic characteristics of three Chinese domestic goat breeds
Source: Genet Sel Evol. 2019 Nov 26;51:70. doi: 10.1186/s12711-019-0512-4 (PMC6880376; doi:10.1186/s12711-019-0512-4)
Supplement: Supplementary file 4 — Additional file 4: Table S3. Summary of the SNPs and indels detected in the nine goat populations analyzed in this study. [file 12711_2019_512_MOESM4_ESM.xlsx]

## Sheet: List
Table S3 Summary of the SNPs and indels detected in the nine goat populations analyzed in this study
Table S3-1 The number and density of the SNPs and indels on each chromsome detected in the nine goat populations
Table S3-2 Summary of the MAF distributions of the biallelic SNPs in three Chinese goat breeds and Bezoar ibexes

## Sheet: Table S3-1
Table S3-1 The number and density of the SNPs and indels on each chromsome detected in the nine goat populations analyzed in this study
Chromosome	Chromosome length	Number of biallelic SNPs	Number of multiallelic SNPs	Number of SNPs	Number of indels	Number of SNVs	Density of biallelic SNPs(SNPS/kb)
1	157403528	1198831	7008	1205839	105712	1311551	7.61629
2	136510947	958929	5177	964106	84872	1048978	7.02456
3	120038259	852512	5200	857712	75310	933022	7.102
4	120734966	889135	4961	894096	78324	972420	7.36435
5	119020588	850517	4827	855344	76025	931369	7.14597
6	117642375	952233	5803	958036	84225	1042261	8.0943
7	108433636	759521	4313	763834	68579	832413	7.00448
8	112672867	809103	4598	813701	71909	885610	7.18099
9	91568626	660842	3973	664815	59912	724727	7.2169
10	101087560	714588	4750	719338	64634	783972	7.069
11	106225002	698964	3602	702566	61239	763805	6.58003
12	87277232	688545	5339	693884	61424	755308	7.88917
13	83034183	545417	2955	548372	47973	596345	6.56858
14	94672733	702832	4053	706885	61420	768305	7.42381
15	81904557	669463	4424	673887	57878	731765	8.1737
16	79370172	579485	3436	582921	51440	634361	7.30104
17	71137785	524088	2943	527031	47073	574104	7.36722
18	67275902	472537	3785	476322	43646	519968	7.02387
19	62516450	407408	2260	409668	35912	445580	6.51681
20	71784255	564678	3329	568007	48325	616332	7.86632
21	69425955	520015	3530	523545	46051	569596	7.49021
22	60283066	389443	1921	391364	34697	426061	6.46024
23	48866549	400897	3798	404695	37197	441892	8.20391
24	62310066	464624	2579	467203	40781	507984	7.45664
25	42858509	292980	1605	294585	24979	319564	6.83598
26	51421553	402404	2471	404875	34643	439518	7.82559
27	44709034	337735	1981	339716	30001	369717	7.55407
28	44672302	370681	2249	372930	31745	404675	8.29778
29	51332696	404007	2409	406416	33757	440173	7.87036
MT	16643	41	1	42	2	44	2.46
Total	2466191353	18082455	109280	18191735	1599685	19791420	7.33214

## Sheet: Table S3-2
Table S3-2 Summary of the MAF distributions of the biallelic SNPs in three Chinese goat breeds and Bezoar ibexes
Types of SNPs	Numbers of SNPs
	Chengdu Brown (n =15)	Jintang Black (n = 9)	Tibetan Cashmere (n = 14)	Bezoar ibex (n = 21)
0.05 ≤ MAF < 0.01	1255382	2327352	1657474	2017725
0.01 ≤ MAF < 0.15	1992035	1980530	2595098	1781890
0.15 ≤ MAF < 0.20	935126	1669681	1411590	1596625
0.20 ≤ MAF < 0.30	1410054	1259996	1083496	1482815
0.25 ≤ MAF < 0.30	937891	1341297	1693554	1260655
0.30 ≤ MAF < 0.35	1231482	1187724	986336	1102275
0.35 ≤ MAF < 0.40	827956	1137833	1305003	1011247
0.40≤ MAF < 0.45	1081159	1106962	701859	951747
0.45 ≤ MAF ≤ 0.50	985484	568710	1056920	1146745
Total (MAF≥ 0.05)	10656569	12580085	12491330	12351724
