# Supplementary material for: Comparative genome analyses reveal the unique genetic composition and selection signals underlying the phenotypic characteristics of three Chinese domestic goat breeds
Source: Genet Sel Evol. 2019 Nov 26;51:70. doi: 10.1186/s12711-019-0512-4 (PMC6880376; doi:10.1186/s12711-019-0512-4)
Supplement: Supplementary file 5 — Additional file 5: Table S4. Summary of the functional annotation of SNPs and indels detected in the nine goat populations analyzed in this study. [file 12711_2019_512_MOESM5_ESM.xlsx]

## Sheet: List
Table S4 Summary of the functional annotation of SNPs and indels detected in the nine goat populations analyzed in this study
Table S4-1 Summary of the functional annotation of SNPs in the nine goat populations analyzed in this study
Table S4-2 Summary of the functional annotation of indels in the nine goat populations analyzed in this stduy

## Sheet: SNPs
Table S4-1 Summary of the functional annotation of SNPs in the nine goat populations analyzed in this study
Number of SNPs	Number of effectsa	Genomic regions	Number of SNPs	Proportion of SNPs
18191735	26943210	Intergenic	12272719	0.4555
		Intron	11887432	0.4412
		Upstream	1215419	0.04511
		Downstream	1201241	0.04458
		Exon	237014	0.0088
		Utr_3_prime	86486	0.00321
		Utr_5_prime	21021	0.00078
		Splice_site_region	21016	0.00078
		Splice_site_donor	518	2e-05
		Splice_site_acceptor	344	1e-05
aThe number of effects was more than the number of SNPs based on genome annotation, because a given snp could be classified into different genomic regions.

## Sheet: Indels
Table S4-2 Summary of the functional annotation of indels in the nine goat populations analyzed in this study
Number of indels	Number of effectsa	Genomic regions	Number of indels	Proportion of indels
1599685	2597743	Intron	1192876	0.4592
		Intergenic	1122427	0.43208
		Downstream	133837	0.05152
		Upstream	126630	0.04875
		Utr_3_prime	11114	0.00428
		Exon	6660	0.00256
		Splice_site_region	2321	0.00089
		Utr_5_prime	1666	0.00064
		Splice_site_acceptor	81	3e-05
		Splice_site_donor	74	3e-05
		Gene	29	1e-05
		Transcript	28	1e-05
aThe number of effects was more than the number of indels based on genome annotation, because a given indel could be classified into different genomic regions.
