# Supplementary material for: Comparative genome analyses reveal the unique genetic composition and selection signals underlying the phenotypic characteristics of three Chinese domestic goat breeds
Source: Genet Sel Evol. 2019 Nov 26;51:70. doi: 10.1186/s12711-019-0512-4 (PMC6880376; doi:10.1186/s12711-019-0512-4)
Supplement: Supplementary file 7 — Additional file 7: Table S5. Summary of ROH detected in six goat populations (CB, JT, TC, MD, MN, and Bezoar ibex). [file 12711_2019_512_MOESM7_ESM.xlsx]

## Sheet: List
Table S5 Summary of ROH detected in six goat populations (CB, JT, TC, MD, MN and Bezoar ibex)
Table S5-1 The number and total length of ROH per individual in each population
Table S5-2 The proportions of ROH with different size in each population

## Sheet: S5-1
Table S5-1 The number and total length of ROH per individual in each population
Breeds	ROH number	Mean ROH size (kb)	Total ROH length (Mb)
CB	1821	288.672	525.672
CB	2084	312.164	650.549
CB	1893	302.377	572.4
CB	1774	304.125	539.517
CB	1526	267	407.442
CB	1825	281.112	513.029
CB	1813	293.341	531.826
CB	1780	320.299	570.132
CB	2101	347.076	729.206
CB	1952	331.894	647.856
CB	1527	290.284	443.264
CB	2128	329.944	702.122
CB	1864	320.129	596.721
CB	1817	305.566	555.214
CB	1824	281.446	513.358
JT	1317	264.799	348.74
JT	1386	253.547	351.416
JT	1233	263.004	324.284
JT	1329	254.764	338.582
JT	1058	235.181	248.822
JT	1269	257.248	326.448
JT	1429	293.867	419.936
JT	1285	254.417	326.926
JT	1232	233.859	288.115
TC	974	195.348	190.269
TC	1012	196.684	199.044
TC	930	200.748	186.696
TC	976	248.244	242.286
TC	933	187.313	174.763
TC	975	212.335	207.026
TC	975	188.361	183.652
TC	885	191.034	169.065
TC	906	194.322	176.056
TC	973	197.328	192
TC	917	189.309	173.597
TC	931	206.851	192.578
TC	1018	182.591	185.878
TC	1100	272.736	300.01
MD	1441	194.479	280.244
MD	1348	382.912	516.165
MD	902	165.376	149.169
MD	1014	259.165	262.793
MD	999	166.677	166.51
MD	975	172.674	168.357
MD	719	172.59	124.092
MD	829	164.949	136.743
MD	688	159.102	109.463
MD	902	160.563	144.827
MD	1071	230.129	246.469
MD	1139	194.579	221.626
MD	928	167.659	155.587
MD	1766	466.417	823.692
MN	1003	305.764	306.682
MN	1177	433.781	510.561
MN	978	217.268	212.488
MN	725	164.38	119.176
MN	684	159.328	108.98
MN	1147	378.085	433.664
MN	840	175.86	147.722
MN	784	167.158	131.052
BI	761	310.924	236.613
BI	1274	479.505	610.89
BI	1400	454.553	636.375
BI	962	372.442	358.289
BI	1346	296.055	398.491
BI	887	372.511	330.417
BI	1403	305.524	428.65
BI	638	214.969	137.15
BI	747	217.665	162.596
BI	1439	299.483	430.956
BI	1411	299.971	423.258
BI	1454	294.523	428.236
BI	1192	704.684	839.984
BI	1262	614.692	775.741
BI	787	242.2	190.611
BI	785	277.006	217.45
BI	1322	301.111	398.068
BI	1556	336.748	523.98
BI	1527	354.84	541.841
BI	1604	642.638	1030.79
BI	1381	595.634	822.571

## Sheet: S5-2
Table S5-2 The proportions of ROH with different size in each population
ROH category	0-250 kb	250-500 kb	500-1000 kb	> 1000 kb
CB	0.620506	0.227487	0.114213	0.0377944
JT	0.707228	0.194314	0.0754897	0.0229676
TC	0.822288	0.134395	0.0322103	0.011107
MD	0.798383	0.121323	0.0530535	0.02724
MN	0.769147	0.120605	0.0670482	0.0431998
BI	0.564007	0.212507	0.138675	0.0848118
