# Supplementary material for: Comparative genome analyses reveal the unique genetic composition and selection signals underlying the phenotypic characteristics of three Chinese domestic goat breeds
Source: Genet Sel Evol. 2019 Nov 26;51:70. doi: 10.1186/s12711-019-0512-4 (PMC6880376; doi:10.1186/s12711-019-0512-4)
Supplement: Supplementary file 10 — Additional file 10: Table S6. Summary of the regions of positive selective sweep identified in three Chinese goat breeds (CB, JT, and TC) [file 12711_2019_512_MOESM10_ESM.xlsx]

## Sheet: List
Table S6 Summary of the positive selective sweep regions identified in three Chinese goat breeds (CB, JT, and TC)
Table S6-1 Summary of the positive selective sweep regions identified in Chengdu Brown goats
Table S6-2 Summary of the positive selective sweep regions identified in Jintang Black goats
Table S6-3 Summary of the positive selective sweep regions identified in Tibetan Cashmere goats

## Sheet: S6-1
Table S6-1 Summary of the positive selective sweep regions identified in Chengdu Brown goats
Chr	Starting position	Ending position	SNP number	BI Pi	CB Pi	θπ ratio	log2(θπ ratio)	Weir_Fst	iHH12
1	20370001	20380000	29	0.00137877	0.00034649	3.97925	1.9925	0.479219	3.79128
1	20380001	20390000	26	0.00102167	0.000260467	3.92245	1.97176	0.551051	4.10329
1	20390001	20400000	22	0.00132795	0.000220466	6.02338	2.59057	0.594799	3.63726
1	20400001	20410000	74	0.00279476	0.000837088	3.33867	1.73927	0.669833	3.64452
1	20420001	20430000	89	0.00332772	0.00107144	3.10584	1.63498	0.640997	3.59166
1	20430001	20440000	39	0.001446	0.000458209	3.15577	1.65799	0.475376	2.9108
1	20460001	20470000	38	0.00239758	0.000532672	4.50104	2.17026	0.515101	2.97791
1	20500001	20510000	26	0.00172731	0.000270139	6.39415	2.67675	0.466783	2.83616
1	20630001	20640000	14	0.00059224	0.00017242	3.43487	1.78025	0.465908	4.06503
1	21410001	21420000	11	0.00142332	0.000145981	9.75004	3.28541	0.472481	2.86762
1	24570001	24580000	52	0.00374676	0.000472898	7.92298	2.98604	0.460655	3.36375
1	25040001	25050000	23	0.0014935	0.000457029	3.26785	1.70834	0.461784	7.59124
1	25050001	25060000	19	0.000867131	0.0002982	2.90788	1.53997	0.479635	9.42499
1	25070001	25080000	13	0.000924012	0.00019633	4.70642	2.23463	0.479531	10.7599
1	25100001	25110000	40	0.0022865	0.000333368	6.85879	2.77795	0.482707	9.91429
1	25110001	25120000	56	0.00318896	0.000641915	4.96789	2.31263	0.476796	9.13787
1	25120001	25130000	45	0.00189003	0.00054014	3.49915	1.807	0.531467	8.352
1	25130001	25140000	25	0.0027054	0.000236146	11.4565	3.51809	0.49717	10.1635
1	25140001	25150000	39	0.00236803	0.000267847	8.84098	3.14421	0.586116	11.8773
1	25170001	25180000	54	0.00221826	0.000567241	3.91061	1.96739	0.495024	9.24021
1	25200001	25210000	16	0.00104047	0.00026621	3.90846	1.9666	0.499484	7.54715
1	25320001	25330000	70	0.00317519	0.000818791	3.8779	1.95528	0.474335	2.75417
1	25330001	25340000	27	0.0014837	0.000392215	3.78287	1.91948	0.5434	3.4039
1	25340001	25350000	16	0.00210608	0.00011908	17.6863	4.14456	0.490596	2.84666
1	25410001	25420000	44	0.00255135	0.000806601	3.16309	1.66133	0.467803	2.99954
1	34240001	34250000	13	0.00227504	0.000393598	5.78011	2.5311	0.513656	3.43057
1	41700001	41710000	19	0.000715009	0.000235408	3.03732	1.6028	0.68098	3.08141
1	42750001	42760000	68	0.00357544	0.000796487	4.48901	2.1664	0.488549	2.63524
1	42880001	42890000	16	0.000915525	0.000212668	4.30495	2.106	0.60672	2.38472
1	42910001	42920000	16	0.00116028	0.000186688	6.21508	2.63577	0.615358	2.75455
1	42960001	42970000	13	0.000685495	9.67879e-05	7.08245	2.82425	0.747273	2.71206
1	43370001	43380000	19	0.000972413	0.000314507	3.09186	1.62848	0.546872	3.49257
1	43380001	43390000	12	0.000795268	0.000228512	3.4802	1.79917	0.560658	2.56911
1	43390001	43400000	16	0.00113382	0.000285751	3.96786	1.98836	0.517044	3.31902
1	43400001	43410000	14	0.00141993	0.000253343	5.60477	2.48666	0.47109	2.82361
1	44000001	44010000	10	0.000565885	0.000150581	3.75801	1.90997	0.507252	2.52087
1	44010001	44020000	11	0.00103095	0.000235868	4.37088	2.12792	0.470052	2.34809
1	68440001	68450000	26	0.00114508	0.000297713	3.84625	1.94345	0.571786	2.68687
1	69100001	69110000	27	0.000990406	0.000317496	3.11943	1.64128	0.522751	3.29614
1	69110001	69120000	36	0.00129148	0.000332452	3.88471	1.95781	0.650798	2.80314
1	69120001	69130000	39	0.00138764	0.000416579	3.33104	1.73597	0.639831	2.64429
1	69880001	69890000	10	0.000769962	7.86217e-05	9.79325	3.29179	0.791238	4.7039
1	69910001	69920000	11	0.000608739	8.52885e-05	7.13741	2.8354	0.803411	2.44904
1	70140001	70150000	10	0.000736613	0.00014046	5.24429	2.39075	0.471436	4.59753
1	71610001	71620000	25	0.00314147	0.000911843	3.44519	1.78458	0.511441	4.60963
1	71810001	71820000	27	0.001157	0.000360014	3.21376	1.68426	0.472966	4.30071
1	74070001	74080000	12	0.00115707	0.000313108	3.69543	1.88574	0.561349	3.19902
1	79230001	79240000	31	0.00119804	0.000390155	3.07068	1.61856	0.633324	2.45291
1	79660001	79670000	57	0.00176637	0.000556143	3.17611	1.66726	0.533548	5.68391
1	79690001	79700000	21	0.00128804	0.000261843	4.91913	2.2984	0.523235	3.49366
1	79700001	79710000	19	0.000944179	0.000267827	3.52533	1.81776	0.55117	2.94494
1	84240001	84250000	19	0.000905869	0.000231521	3.91269	1.96816	0.462077	3.12751
1	94070001	94080000	20	0.00185903	0.000499094	3.72481	1.89717	0.50248	3.08109
1	103870001	103880000	23	0.00151958	0.000390135	3.89501	1.96163	0.47957	3.0489
1	103880001	103890000	15	0.00115036	0.000270128	4.25857	2.09037	0.537558	2.99635
1	103920001	103930000	65	0.00470517	0.0011071	4.25	2.08746	0.473551	5.39553
1	104020001	104030000	38	0.00179692	0.000494272	3.63549	1.86215	0.635908	2.37989
1	104290001	104300000	51	0.00260476	0.000540648	4.81785	2.26839	0.469135	2.56164
1	112010001	112020000	17	0.00366148	0.000366245	9.99735	3.32155	0.643938	3.15645
1	112020001	112030000	16	0.00502858	0.000434264	11.5795	3.53351	0.605874	2.77886
1	112580001	112590000	18	0.00112309	0.000312454	3.59442	1.84576	0.497431	3.10031
1	112590001	112600000	14	0.00213847	0.000167595	12.7597	3.67353	0.518446	3.27383
1	112920001	112930000	40	0.00318628	0.000784061	4.06382	2.02284	0.587306	8.85085
1	113040001	113050000	11	0.000724471	0.000144609	5.00986	2.32477	0.510209	6.85747
1	113130001	113140000	21	0.00244718	0.000536364	4.56254	2.18984	0.548222	2.85878
1	113410001	113420000	51	0.00248627	0.000740058	3.35956	1.74827	0.48596	2.73594
1	113980001	113990000	36	0.0038633	0.00103685	3.726	1.89763	0.542571	4.17052
1	114330001	114340000	13	0.00224119	0.0002161	10.3711	3.37449	0.537414	8.92172
1	114350001	114360000	36	0.00172612	0.000447598	3.85641	1.94726	0.486646	7.80329
1	114370001	114380000	34	0.00162418	0.000416579	3.89885	1.96305	0.496376	6.34574
1	114380001	114390000	13	0.00144182	0.000192881	7.47518	2.90211	0.514514	5.77586
1	114390001	114400000	16	0.00115383	0.000245527	4.6994	2.23248	0.498952	5.0133
1	114400001	114410000	15	0.000907932	0.000245993	3.69089	1.88397	0.472643	5.07621
1	114410001	114420000	19	0.00115933	0.000243914	4.75303	2.24885	0.46738	4.64757
1	114420001	114430000	21	0.00155854	0.000366911	4.24773	2.08669	0.482661	4.03868
1	114450001	114460000	73	0.00277195	0.000796896	3.47843	1.79844	0.72494	4.00011
1	114460001	114470000	58	0.00326979	0.000657293	4.97463	2.31459	0.476504	3.04425
1	114540001	114550000	10	0.00176436	0.0003798	4.6455	2.21583	0.563418	2.62144
1	114870001	114880000	27	0.00170468	0.000206002	8.27507	3.04877	0.623841	2.40678
1	118040001	118050000	13	0.00110171	9.81635e-05	11.2232	3.48841	0.481784	4.2302
1	118050001	118060000	20	0.00100168	0.000188736	5.30731	2.40798	0.628628	3.31985
1	118060001	118070000	15	0.000845708	0.000154025	5.49072	2.457	0.594412	2.37405
1	119640001	119650000	21	0.000704891	0.000210353	3.35099	1.74459	0.492924	5.12416
1	124620001	124630000	14	0.0010838	0.000126903	8.54038	3.0943	0.558172	3.01222
1	124650001	124660000	34	0.00116298	0.000305315	3.80912	1.92946	0.47576	4.26977
1	124660001	124670000	42	0.00187753	0.000637743	2.94402	1.55779	0.596044	3.57833
1	124700001	124710000	51	0.00169255	0.000568349	2.97801	1.57435	0.533116	5.55163
1	124980001	124990000	48	0.00277085	0.000949279	2.9189	1.54542	0.514782	2.62914
1	129610001	129620000	19	0.000834162	0.00020209	4.12768	2.04533	0.509265	2.9621
1	130450001	130460000	19	0.00125723	0.000180697	6.95767	2.7986	0.56113	2.67745
1	130460001	130470000	13	0.0005876	0.000180232	3.26024	1.70498	0.587766	2.87937
1	130470001	130480000	13	0.000850547	9.10369e-05	9.34288	3.22387	0.493592	2.49751
2	13890001	13900000	46	0.00152333	0.000424756	3.58636	1.84252	0.64057	3.48059
2	14670001	14680000	11	0.000635796	0.000191269	3.32409	1.73296	0.600509	4.10475
2	14680001	14690000	11	0.000606637	0.000208741	2.90617	1.53912	0.604995	3.80445
2	17070001	17080000	20	0.00132633	0.000340988	3.88967	1.95965	0.537104	4.28785
2	17090001	17100000	12	0.000572754	0.000166209	3.44599	1.78492	0.522079	4.50855
2	17120001	17130000	10	0.000669131	8.34494e-05	8.0184	3.00332	0.637493	3.40503
2	44480001	44490000	11	0.000770913	0.000163925	4.70284	2.23353	0.53386	4.20999
2	44500001	44510000	12	0.000791064	8.43722e-05	9.37588	3.22895	0.60073	4.2353
2	44510001	44520000	19	0.000830461	0.000170128	4.88139	2.28729	0.563941	4.99706
2	44540001	44550000	16	0.00149489	0.000135411	11.0396	3.46462	0.504464	6.79881
2	44550001	44560000	14	0.00107315	9.28748e-05	11.5548	3.53042	0.53175	5.8752
2	44560001	44570000	22	0.001342	0.000162071	8.28032	3.04969	0.503204	5.23915
2	44740001	44750000	24	0.00142977	0.000435998	3.2793	1.71339	0.568439	5.82329
2	66070001	66080000	16	0.000890833	0.000303222	2.93789	1.55478	0.493073	3.14681
2	66080001	66090000	22	0.00140542	0.000383487	3.66484	1.87375	0.546438	2.87479
2	67660001	67670000	100	0.00519442	0.00136968	3.79243	1.92312	0.489091	2.77254
2	67670001	67680000	58	0.00375478	0.000802634	4.67807	2.22591	0.466876	2.79095
2	67790001	67800000	21	0.000841371	0.000265758	3.16593	1.66263	0.586453	4.2536
2	67800001	67810000	23	0.000971707	0.000297038	3.27132	1.70987	0.593305	3.55782
2	67820001	67830000	22	0.000901195	0.000252673	3.56665	1.83457	0.63268	3.33412
2	67830001	67840000	17	0.00197049	0.000212885	9.25612	3.21041	0.493045	2.46718
2	97000001	97010000	16	0.000907932	0.000292659	3.10235	1.63336	0.538515	4.76283
2	97010001	97020000	15	0.00118153	0.000236561	4.99461	2.32037	0.562729	4.63742
2	97040001	97050000	41	0.00180375	0.000459812	3.9228	1.97188	0.597009	3.17512
2	97180001	97190000	23	0.00164253	0.000489457	3.35582	1.74667	0.505724	4.11764
2	132310001	132320000	27	0.00345212	0.000632538	5.45757	2.44826	0.536938	2.98111
2	135230001	135240000	41	0.00220448	0.00063666	3.46257	1.79184	0.490062	3.90577
3	6650001	6660000	23	0.00092114	0.000234973	3.9202	1.97093	0.661916	9.64277
3	6790001	6800000	38	0.00260105	0.000554512	4.6907	2.2298	0.578371	3.0621
3	6820001	6830000	96	0.00529786	0.0008294	6.38758	2.67527	0.57027	3.51285
3	6980001	6990000	34	0.0021371	0.000308074	6.93697	2.79431	0.474696	2.85636
3	6990001	7000000	50	0.0025198	0.000526592	4.78511	2.25855	0.559205	3.25096
3	7000001	7010000	18	0.00142221	0.000227607	6.24853	2.64352	0.542566	2.96522
3	7070001	7080000	36	0.00224649	0.000440747	5.09701	2.34965	0.486937	3.51836
3	7100001	7110000	33	0.00192024	0.000338235	5.67724	2.50519	0.460873	2.77185
3	7570001	7580000	13	0.000676394	0.000208974	3.23674	1.69454	0.482051	14.0994
3	15620001	15630000	18	0.00126604	0.000273375	4.63115	2.21137	0.558703	2.45483
3	15630001	15640000	11	0.00127906	0.000233333	5.48169	2.45462	0.565043	3.17602
3	15640001	15650000	14	0.000992853	0.000202082	4.91312	2.29664	0.670924	3.77282
3	15980001	15990000	15	0.00057117	0.000196119	2.91236	1.54219	0.563365	5.9937
3	18870001	18880000	63	0.00337895	0.000560472	6.02876	2.59186	0.478628	3.53135
3	18880001	18890000	30	0.00184973	0.000233569	7.91942	2.98539	0.523879	3.54069
3	18890001	18900000	35	0.00154548	0.0003798	4.06919	2.02474	0.561567	3.98757
3	18910001	18920000	13	0.000712112	0.000137938	5.16255	2.36808	0.478996	5.96133
3	18940001	18950000	12	0.000365874	0.00010345	3.53672	1.82241	0.850622	4.59383
3	21250001	21260000	17	0.00131126	0.000283682	4.62229	2.20861	0.476978	4.20262
3	21260001	21270000	13	0.000866383	0.00022369	3.87314	1.9535	0.536025	3.74797
3	40320001	40330000	11	0.000852521	0.000197944	4.30688	2.10664	0.614303	3.60422
3	40330001	40340000	13	0.00101094	0.000272888	3.7046	1.88932	0.499728	2.79667
3	40360001	40370000	10	0.000580896	0.000173336	3.35127	1.74471	0.560222	6.6292
3	54080001	54090000	10	0.000876107	0.000192649	4.54769	2.18513	0.486916	3.01091
3	54640001	54650000	14	0.000828006	0.000213112	3.88531	1.95803	0.478009	2.70318
3	54660001	54670000	44	0.00363466	0.0004172	8.71203	3.12301	0.591782	2.62524
3	55200001	55210000	29	0.000983348	0.000340261	2.88998	1.53106	0.703959	4.68467
3	55210001	55220000	11	0.000871857	0.000145059	6.01036	2.58745	0.522554	3.73413
3	55260001	55270000	25	0.00131172	0.000329655	3.97907	1.99243	0.499047	4.2202
3	55270001	55280000	20	0.000987646	0.000251507	3.92691	1.9734	0.470754	4.00862
3	63300001	63310000	64	0.0031952	0.000554117	5.76629	2.52764	0.527378	3.52355
3	63380001	63390000	14	0.00110379	0.000146443	7.53734	2.91405	0.500318	2.45163
3	73090001	73100000	13	0.000535782	0.000169428	3.1623	1.66097	0.528739	3.6694
3	75430001	75440000	18	0.00108117	0.00012254	8.823	3.14127	0.510778	2.64914
3	79000001	79010000	31	0.00184497	0.00030899	5.97097	2.57797	0.480232	5.06085
3	79010001	79020000	20	0.00133262	0.000234029	5.69425	2.50951	0.495384	4.49153
3	79050001	79060000	53	0.00260326	0.00072393	3.59601	1.8464	0.538307	2.58869
3	79120001	79130000	52	0.00216557	0.000686171	3.15602	1.65811	0.64022	3.16297
3	79980001	79990000	30	0.00133944	0.000277273	4.83076	2.27225	0.517219	5.46725
3	79990001	80000000	26	0.00127307	0.000317738	4.00667	2.0024	0.623365	4.79247
3	80000001	80010000	28	0.00131429	0.000345986	3.79868	1.9255	0.47777	4.5253
3	80010001	80020000	22	0.00111936	0.000290364	3.85502	1.94674	0.480696	3.67949
3	80020001	80030000	28	0.00119283	0.000381892	3.12347	1.64315	0.561393	2.98811
3	87130001	87140000	13	0.000673422	0.000215178	3.1296	1.64598	0.638036	4.17533
3	87170001	87180000	14	0.000791536	0.000158393	4.99729	2.32115	0.568999	3.0294
3	90880001	90890000	11	0.000585863	0.000128736	4.55089	2.18615	0.763194	4.4617
3	94740001	94750000	11	0.000951068	0.000199313	4.77173	2.25451	0.590766	3.10386
3	95760001	95770000	29	0.00266717	0.000271785	9.81353	3.29477	0.549909	3.67524
3	95800001	95810000	26	0.00347626	0.000323991	10.7295	3.42351	0.474067	4.05165
3	101050001	101060000	22	0.00127666	0.000154499	8.26323	3.0467	0.524355	3.06741
3	101190001	101200000	25	0.00246168	0.000236567	10.4058	3.37932	0.492743	2.95818
4	850001	860000	24	0.00115576	0.000261005	4.42811	2.14669	0.517644	3.3234
4	880001	890000	49	0.00210939	0.000476353	4.42821	2.14672	0.5497	3.68884
4	890001	900000	20	0.00114889	0.000243044	4.72709	2.24095	0.482243	2.98527
4	920001	930000	17	0.000758499	0.000209673	3.61753	1.85501	0.59856	3.4695
4	990001	1000000	46	0.00163496	0.000547945	2.9838	1.57715	0.518173	2.63366
4	1000001	1010000	45	0.00164121	0.000555078	2.95672	1.564	0.471125	3.64916
4	1020001	1030000	36	0.00289498	0.0004618	6.2689	2.64821	0.509883	4.00681
4	1030001	1040000	63	0.00298867	0.000718135	4.16171	2.05718	0.504018	4.76461
4	1080001	1090000	24	0.00120458	0.000310607	3.87815	1.95537	0.539709	4.58741
4	1100001	1110000	32	0.00115364	0.000365131	3.15952	1.65971	0.636473	3.43308
4	1140001	1150000	19	0.00142907	0.000179796	7.94829	2.99064	0.557347	2.59158
4	1170001	1180000	34	0.0022469	0.000339613	6.61606	2.72597	0.556198	3.9621
4	1190001	1200000	26	0.0018863	0.000225069	8.38099	3.06712	0.529025	5.42198
4	1210001	1220000	36	0.00222318	0.000338637	6.56508	2.71481	0.561004	4.07559
4	1350001	1360000	21	0.00116716	0.000193358	6.03626	2.59366	0.58376	5.71924
4	1380001	1390000	27	0.00138902	0.000317503	4.37482	2.12923	0.461372	4.88251
4	1390001	1400000	17	0.00085212	0.000216108	3.94303	1.9793	0.462347	4.1874
4	1410001	1420000	13	0.000827246	0.000143227	5.77577	2.53001	0.463751	3.01069
4	1440001	1450000	44	0.00245358	0.000478925	5.1231	2.35702	0.496631	3.16741
4	1450001	1460000	52	0.00242903	0.000471568	5.15096	2.36484	0.607898	3.36341
4	1470001	1480000	39	0.00186023	0.000398702	4.66572	2.2221	0.570507	2.87783
4	1530001	1540000	33	0.00104788	0.000249251	4.20412	2.0718	0.744954	5.52678
4	1540001	1550000	15	0.000788492	0.000145546	5.41748	2.43762	0.605236	4.98225
4	1550001	1560000	19	0.000702652	0.000179777	3.90846	1.9666	0.620169	4.35063
4	1560001	1570000	25	0.00237329	0.000235197	10.0906	3.33495	0.476946	3.66117
4	1580001	1590000	20	0.00112925	0.000256558	4.40154	2.13801	0.47484	4.19812
4	1590001	1600000	12	0.000619751	0.000122071	5.07697	2.34397	0.572907	4.40489
4	1600001	1610000	23	0.00127652	0.000243942	5.23288	2.38761	0.513175	3.63575
4	1970001	1980000	29	0.00212942	0.000265761	8.01254	3.00226	0.563845	2.98455
4	2380001	2390000	13	0.0005095	0.000174274	2.92356	1.54772	0.649533	7.24394
4	2430001	2440000	11	0.000562295	0.000127356	4.41514	2.14246	0.546904	7.77592
4	2470001	2480000	21	0.000684855	0.000228515	2.99698	1.58351	0.628688	5.30549
4	2870001	2880000	42	0.0018242	0.00061155	2.98291	1.57672	0.525181	3.50426
4	2880001	2890000	40	0.00222254	0.000541902	4.10137	2.03611	0.465645	2.71262
4	16250001	16260000	21	0.00199874	0.000645182	3.09795	1.63131	0.466033	5.09172
4	19910001	19920000	44	0.00291099	0.000426744	6.8214	2.77007	0.494964	2.63574
4	19950001	19960000	50	0.00199302	0.000608648	3.2745	1.71128	0.515208	2.37116
4	24970001	24980000	55	0.00247547	0.000421903	5.86739	2.55272	0.601354	4.53301
4	24980001	24990000	39	0.00150968	0.000360019	4.19333	2.0681	0.631568	3.67507
4	24990001	25000000	65	0.00248692	0.000593863	4.1877	2.06616	0.596279	4.58446
4	25010001	25020000	43	0.00165614	0.000363514	4.55592	2.18774	0.481149	3.88877
4	25020001	25030000	26	0.00175703	0.000265775	6.61097	2.72486	0.494801	3.03714
4	25100001	25110000	17	0.000574818	0.000146446	3.92512	1.97274	0.638257	4.8567
4	25110001	25120000	18	0.000707453	0.000182078	3.88544	1.95808	0.618019	3.91595
4	25150001	25160000	23	0.000711087	0.000216336	3.28696	1.71675	0.663141	4.46196
4	25170001	25180000	19	0.000909733	0.000159609	5.69976	2.5109	0.536098	3.26651
4	49300001	49310000	18	0.00142119	0.000259787	5.4706	2.4517	0.471642	3.16425
4	50380001	50390000	43	0.00204182	0.00052923	3.8581	1.94789	0.540387	2.95805
4	52030001	52040000	12	0.000906654	0.000196557	4.61268	2.2056	0.468669	6.2606
4	52040001	52050000	34	0.00172659	0.000597126	2.8915	1.53182	0.48886	5.565
4	72740001	72750000	35	0.0016747	0.000280237	5.97601	2.57918	0.473674	4.67261
4	72750001	72760000	47	0.00170037	0.000374028	4.5461	2.18463	0.742927	6.58891
4	72760001	72770000	63	0.00201447	0.000461627	4.36385	2.1256	0.77951	6.66495
4	72770001	72780000	39	0.00247942	0.000368065	6.73636	2.75197	0.509169	5.7721
4	81280001	81290000	10	0.000783893	0.000188973	4.14817	2.05248	0.465877	3.82113
4	97300001	97310000	27	0.00135524	0.000458692	2.95458	1.56295	0.530573	2.73469
4	105420001	105430000	20	0.00185886	0.000207602	8.95396	3.16253	0.465974	2.60267
4	108280001	108290000	15	0.00147357	0.0003083	4.77966	2.25691	0.565402	2.62259
4	108290001	108300000	19	0.00146796	0.000417748	3.51398	1.81311	0.582611	2.92934
4	111330001	111340000	30	0.00156733	0.00039015	4.01725	2.00621	0.61695	4.20463
4	111340001	111350000	32	0.00148265	0.000413365	3.58678	1.84269	0.651921	5.28965
4	113030001	113040000	32	0.00138422	0.000330398	4.18955	2.0668	0.460561	2.43319
5	6830001	6840000	19	0.00335696	0.000212646	15.7866	3.98063	0.52336	2.73898
5	15620001	15630000	38	0.00221753	0.000550179	4.03056	2.01098	0.708803	4.15187
5	33380001	33390000	16	0.000995777	0.000308764	3.22504	1.68932	0.510014	5.43156
5	33390001	33400000	10	0.000743501	0.000212433	3.49993	1.80733	0.531069	4.5721
5	47400001	47410000	10	0.00201316	0.000240233	8.38003	3.06696	0.557874	2.42559
5	48920001	48930000	28	0.00106554	0.000358649	2.97098	1.57094	0.462582	3.48938
5	59530001	59540000	24	0.00161337	0.00052443	3.07643	1.62126	0.506652	2.53501
5	64640001	64650000	11	0.000488748	7.95402e-05	6.14467	2.61933	0.726995	5.76303
5	64650001	64660000	14	0.000706182	9.33333e-05	7.56624	2.91958	0.530386	4.65747
5	64670001	64680000	11	0.000656251	0.000118395	5.54289	2.47064	0.515661	3.36471
5	64690001	64700000	10	0.000424983	0.000100691	4.22067	2.07747	0.598593	4.01209
5	64700001	64710000	10	0.000555876	0.000135634	4.09835	2.03504	0.516799	3.84566
5	64710001	64720000	10	0.000631016	0.000107816	5.85271	2.54911	0.481438	3.73486
5	68320001	68330000	16	0.000615382	0.000134951	4.56004	2.18905	0.514399	8.41204
5	68330001	68340000	13	0.000668672	0.000175179	3.81708	1.93247	0.637582	7.50548
5	68350001	68360000	19	0.000807291	0.000240242	3.36032	1.7486	0.522127	11.2396
5	68360001	68370000	23	0.000901768	0.000310817	2.90128	1.53669	0.586014	10.8484
5	68370001	68380000	22	0.00109438	0.000315181	3.47223	1.79586	0.552437	10.8207
5	68430001	68440000	31	0.00179323	0.000307606	5.82963	2.5434	0.503275	9.25788
5	68520001	68530000	15	0.000789728	0.000130576	6.04803	2.59647	0.529784	7.21771
5	68560001	68570000	10	0.000493689	6.62078e-05	7.45666	2.89853	0.708423	6.99235
5	68570001	68580000	13	0.00102262	0.000147818	6.9181	2.79038	0.556213	6.36654
5	68580001	68590000	10	0.000881241	6.48309e-05	13.5929	3.76478	0.616349	6.06816
5	68590001	68600000	12	0.00137036	0.000129195	10.6069	3.40693	0.472441	6.76416
5	76430001	76440000	24	0.000699207	0.000240938	2.90202	1.53706	0.650154	2.50432
5	80460001	80470000	11	0.000815238	0.000215408	3.78462	1.92015	0.582972	2.34493
5	80470001	80480000	10	0.000551694	7.24147e-05	7.61854	2.92951	0.765976	3.57151
5	87860001	87870000	24	0.00108807	0.000231064	4.70896	2.23541	0.545958	2.40057
5	110340001	110350000	23	0.000852545	0.000292425	2.91543	1.54371	0.515511	3.54563
6	26140001	26150000	13	0.00191873	0.000104829	18.3034	4.19404	0.499422	3.79818
6	26230001	26240000	20	0.00103536	0.00028139	3.67945	1.87949	0.47945	2.60161
6	31300001	31310000	11	0.000647747	0.000122069	5.3064	2.40773	0.484264	2.56457
6	40040001	40050000	16	0.000907261	0.000306679	2.95834	1.56479	0.491023	3.66436
6	52220001	52230000	18	0.00105324	0.000339324	3.10394	1.6341	0.47488	2.4606
6	60930001	60940000	12	0.00237571	0.000298436	7.96053	2.99287	0.547344	3.45389
6	61300001	61310000	17	0.00164369	0.000410356	4.00552	2.00199	0.661833	7.56716
6	61490001	61500000	22	0.00132187	0.00043681	3.02619	1.5975	0.46985	6.25228
6	61530001	61540000	23	0.00166302	0.000301399	5.51767	2.46406	0.531234	4.47446
6	61540001	61550000	35	0.0018919	0.000547586	3.45498	1.78868	0.466355	4.09876
6	61660001	61670000	41	0.00244745	0.000675234	3.6246	1.85782	0.505897	3.41895
6	61690001	61700000	28	0.00214696	0.000492439	4.35985	2.12428	0.670076	3.1164
6	61700001	61710000	44	0.0031083	0.000482586	6.44092	2.68727	0.513411	5.14948
6	62080001	62090000	15	0.000775429	0.000178628	4.34103	2.11804	0.484703	3.24077
6	62480001	62490000	45	0.00408094	0.000748402	5.45287	2.44702	0.502065	3.4275
6	63610001	63620000	73	0.00289205	0.000949549	3.04571	1.60678	0.471226	9.14773
6	63640001	63650000	62	0.00287302	0.000805842	3.56524	1.834	0.551275	7.74874
6	63660001	63670000	30	0.00267776	0.000744886	3.59486	1.84594	0.473311	6.64685
6	63810001	63820000	44	0.00225035	0.000533643	4.21696	2.0762	0.548957	5.96265
6	63870001	63880000	52	0.00175856	0.000430614	4.08384	2.02993	0.513483	3.3961
6	63880001	63890000	44	0.0024839	0.00048325	5.13999	2.36177	0.579276	2.916
6	63890001	63900000	39	0.00163675	0.000448299	3.65102	1.8683	0.581083	2.85778
6	63970001	63980000	35	0.00229784	0.000453845	5.06305	2.34001	0.463008	4.80621
6	64540001	64550000	116	0.00434749	0.0011759	3.69716	1.88642	0.58593	2.74677
6	64550001	64560000	146	0.00608799	0.00140836	4.32275	2.11195	0.531555	3.11484
6	64920001	64930000	23	0.000908869	0.000307222	2.95835	1.56479	0.669728	5.97741
6	65290001	65300000	19	0.00176471	0.000222549	7.92953	2.98724	0.544983	4.98917
6	65410001	65420000	57	0.00237449	0.000648886	3.65933	1.87158	0.460313	6.27317
6	65440001	65450000	33	0.00113907	0.000317746	3.58484	1.84191	0.612028	6.06848
6	65550001	65560000	29	0.00135512	0.000399122	3.39525	1.76352	0.461199	5.08075
6	65590001	65600000	23	0.00119718	0.000388092	3.08478	1.62517	0.465607	3.51972
6	65600001	65610000	17	0.000753619	0.000252204	2.98813	1.57924	0.536531	2.82536
6	65650001	65660000	29	0.0013426	0.000324655	4.13547	2.04805	0.515254	4.63963
6	65660001	65670000	23	0.000859846	0.000197032	4.36399	2.12565	0.615439	5.53184
6	65670001	65680000	26	0.00122217	0.000327156	3.73574	1.90139	0.515167	5.15346
6	65690001	65700000	31	0.00120291	0.000397487	3.02629	1.59755	0.562303	7.32704
6	65700001	65710000	22	0.00179351	0.000277964	6.45231	2.68982	0.501878	8.24129
6	65710001	65720000	23	0.00194546	0.000304392	6.3913	2.67611	0.67083	7.51532
6	65730001	65740000	35	0.0027038	0.000404403	6.6859	2.74112	0.464033	9.52459
6	65770001	65780000	33	0.00147245	0.000439591	3.34959	1.74398	0.506138	15.8103
6	65810001	65820000	34	0.00168396	0.000429269	3.92285	1.9719	0.631068	14.3274
6	65820001	65830000	15	0.00120439	0.000213796	5.63336	2.494	0.477964	13.4151
6	65850001	65860000	12	0.0010643	0.000142768	7.45475	2.89816	0.504481	10.8129
6	65860001	65870000	12	0.000837569	0.00012299	6.81006	2.76767	0.554712	10.1307
6	65870001	65880000	15	0.00127884	0.000173565	7.36808	2.88129	0.493366	9.29591
6	65880001	65890000	12	0.00107069	0.000153565	6.97223	2.80162	0.512032	8.5531
6	65890001	65900000	12	0.000610598	0.000131742	4.6348	2.21251	0.617348	12.2125
6	65910001	65920000	13	0.000756597	0.000150353	5.03214	2.33117	0.648381	12.0745
6	65940001	65950000	16	0.00110728	0.000212881	5.2014	2.3789	0.504304	9.47468
6	65960001	65970000	12	0.000650095	0.000157018	4.14026	2.04972	0.548659	7.75588
6	65970001	65980000	10	0.000902489	0.000136559	6.60878	2.72438	0.49569	8.26239
6	66070001	66080000	13	0.00104162	0.000145983	7.13521	2.83496	0.58895	4.39609
6	66080001	66090000	12	0.000864981	0.000169887	5.09151	2.34809	0.500202	3.4935
6	66100001	66110000	13	0.000964639	0.000146685	6.57626	2.71727	0.570646	6.05494
6	66110001	66120000	14	0.00164915	0.000167356	9.85414	3.30073	0.492066	5.28822
6	67550001	67560000	21	0.00128623	0.000158621	8.10883	3.01949	0.538548	10.1825
6	67570001	67580000	10	0.00185256	7.19559e-05	25.7458	4.68626	0.561779	10.3593
6	67670001	67680000	48	0.00281792	0.000317722	8.86914	3.14879	0.539748	2.931
6	67700001	67710000	15	0.000838996	0.000168515	4.97876	2.31579	0.589631	6.09764
6	67740001	67750000	12	0.00080353	0.000248286	3.23631	1.69435	0.558967	6.38659
6	67810001	67820000	28	0.00283557	0.000591065	4.79739	2.26225	0.468957	9.87778
6	67870001	67880000	25	0.00114105	0.000315205	3.62003	1.856	0.559996	7.5341
6	67880001	67890000	19	0.00102736	0.000230369	4.45963	2.15692	0.503994	6.72772
6	69180001	69190000	15	0.00252328	0.000531975	4.74323	2.24587	0.523864	3.57023
6	70390001	70400000	44	0.00194287	0.000469027	4.14234	2.05045	0.479113	3.11982
6	70400001	70410000	50	0.00204165	0.000533584	3.8263	1.93595	0.484426	2.87524
6	75170001	75180000	41	0.00265014	0.000726988	3.64537	1.86607	0.466971	5.73024
6	75200001	75210000	30	0.00158451	0.000385792	4.10716	2.03814	0.502128	5.04198
6	75220001	75230000	28	0.00133985	0.000414536	3.23217	1.6925	0.468507	3.66314
6	75230001	75240000	14	0.00110662	0.000142315	7.77585	2.959	0.522559	2.97745
6	75320001	75330000	28	0.00209539	0.00041335	5.06929	2.34178	0.56842	2.91605
6	75330001	75340000	23	0.00120003	0.00038783	3.09422	1.62957	0.614816	2.4572
6	78430001	78440000	12	0.00085466	0.000156098	5.47515	2.4529	0.530275	11.2562
6	78440001	78450000	19	0.00126462	0.000252417	5.01004	2.32482	0.502509	10.4243
6	78450001	78460000	30	0.00162781	0.000386247	4.21443	2.07534	0.558715	9.64574
6	78470001	78480000	11	0.00051174	0.000162303	3.15299	1.65672	0.648938	12.254
6	78600001	78610000	16	0.000688418	0.000192186	3.58204	1.84078	0.487517	2.78557
6	81300001	81310000	22	0.00185589	0.000335645	5.52932	2.4671	0.482862	3.01556
6	81310001	81320000	29	0.00134306	0.00039181	3.42783	1.7773	0.56118	2.42875
6	81380001	81390000	29	0.00202644	0.00049484	4.09514	2.03391	0.497639	2.80701
6	81460001	81470000	19	0.00209631	0.000314044	6.67521	2.73881	0.501239	2.93754
6	87130001	87140000	47	0.00225176	0.000619899	3.63246	1.86095	0.592499	3.90147
6	87480001	87490000	46	0.00250606	0.000459099	5.45865	2.44854	0.558688	2.98475
6	106990001	107000000	14	0.00149122	0.000170809	8.73034	3.12604	0.466124	3.97888
6	107000001	107010000	20	0.000975888	0.000261163	3.7367	1.90177	0.567709	3.30448
6	107020001	107030000	59	0.00555695	0.000858239	6.47483	2.69484	0.483333	2.73743
6	107040001	107050000	91	0.004222	0.00101215	4.17132	2.0605	0.50241	4.04636
6	107060001	107070000	150	0.00629683	0.00182654	3.44741	1.78551	0.503187	3.15652
6	107170001	107180000	23	0.00171815	0.000389001	4.41683	2.14301	0.486493	3.55056
6	107180001	107190000	16	0.00147894	0.000198171	7.46295	2.89975	0.476914	4.14633
6	107190001	107200000	28	0.00144019	0.000394544	3.65026	1.868	0.495806	4.39006
6	107200001	107210000	21	0.00132818	0.000340256	3.90347	1.96476	0.51222	4.139
6	107220001	107230000	19	0.00468654	0.000370134	12.6617	3.6624	0.510096	3.86533
7	6390001	6400000	15	0.00224626	0.00018552	12.1079	3.59788	0.486012	6.28306
7	6400001	6410000	24	0.00120323	0.000303257	3.96769	1.9883	0.667804	5.11559
7	6420001	6430000	32	0.00154186	0.000440825	3.49767	1.80639	0.48253	4.21289
7	16070001	16080000	21	0.00155388	0.000198864	7.81378	2.96602	0.486893	3.35098
7	23290001	23300000	30	0.00173235	0.000346477	4.9999	2.3219	0.47866	3.94451
7	23310001	23320000	28	0.00164005	0.000222078	7.38502	2.8846	0.515564	3.77065
7	23320001	23330000	15	0.00112222	0.000129659	8.65516	3.11356	0.51222	2.89089
7	26430001	26440000	12	0.000622677	0.000167597	3.71532	1.89349	0.512322	2.82139
7	26510001	26520000	41	0.00164107	0.000559145	2.93496	1.55334	0.589772	2.4136
7	28090001	28100000	15	0.00161233	0.000366714	4.3967	2.13642	0.52018	2.59732
7	29070001	29080000	19	0.0033199	0.000418662	7.92979	2.98728	0.642213	4.57246
8	50001	60000	17	0.00288686	0.00030805	9.3714	3.22826	0.475492	2.4245
8	130001	140000	11	0.000934587	0.000168968	5.53115	2.46758	0.49849	3.90138
8	140001	150000	25	0.00119132	0.000344616	3.45695	1.7895	0.503832	3.22402
8	150001	160000	11	0.000604558	0.000142766	4.23461	2.08223	0.599292	2.47424
8	9370001	9380000	16	0.000825134	0.000230816	3.57486	1.83789	0.490566	5.65262
8	15550001	15560000	55	0.00241083	0.000746753	3.22842	1.69083	0.517305	4.06302
8	30700001	30710000	11	0.000699703	0.000147136	4.75548	2.24959	0.467641	4.06371
8	30710001	30720000	18	0.0010429	0.000187136	5.57295	2.47844	0.499699	3.96132
8	30790001	30800000	29	0.00126041	0.000414959	3.03743	1.60285	0.497811	3.56451
8	31660001	31670000	71	0.00483893	0.00110276	4.38802	2.13357	0.515312	2.7667
8	39550001	39560000	14	0.00051384	0.000168966	3.04109	1.60459	0.76039	2.62703
8	39560001	39570000	11	0.000244155	8.3908e-05	2.90979	1.54092	0.888359	2.67467
8	40740001	40750000	20	0.000885888	0.000219089	4.04351	2.01561	0.542148	5.81145
8	43920001	43930000	11	0.000549836	7.19559e-05	7.64129	2.93382	0.619752	4.3566
8	43940001	43950000	11	0.00138544	9.97779e-05	13.8852	3.79548	0.668928	2.87383
8	55620001	55630000	15	0.000640442	0.000188508	3.39743	1.76444	0.638673	3.0997
8	55630001	55640000	20	0.000834913	0.000253583	3.29246	1.71917	0.551926	2.38209
8	75580001	75590000	17	0.000987145	0.000138161	7.14489	2.83691	0.657935	5.09993
8	75620001	75630000	12	0.000441708	0.000137471	3.2131	1.68397	0.797222	3.35642
8	75630001	75640000	10	0.000510579	0.000171039	2.98516	1.57781	0.50622	3.41033
8	84040001	84050000	11	0.000712951	0.000118392	6.02195	2.59023	0.518819	2.45255
8	87380001	87390000	24	0.00305369	0.000359586	8.49224	3.08614	0.462221	4.11636
8	87900001	87910000	24	0.000971303	0.000321174	3.02423	1.59657	0.529076	3.2286
9	29040001	29050000	18	0.000869419	0.000251287	3.45986	1.79072	0.575891	4.15395
9	29060001	29070000	10	0.00150744	0.000182989	8.23787	3.04227	0.518356	2.54109
9	29070001	29080000	13	0.001226	0.000171045	7.1677	2.84151	0.513834	3.00948
9	40670001	40680000	69	0.00261096	0.000862237	3.02812	1.59842	0.756663	2.94121
9	42410001	42420000	58	0.00292943	0.000879938	3.32913	1.73515	0.599652	2.68982
9	42420001	42430000	12	0.00160535	0.000183239	8.76096	3.13109	0.629246	2.82165
9	50220001	50230000	11	0.000649037	0.000210118	3.08892	1.6271	0.653946	2.49065
9	54010001	54020000	13	0.000780727	0.000229894	3.39603	1.76385	0.585621	2.3541
9	54070001	54080000	28	0.00162512	0.000476098	3.41341	1.77122	0.547952	2.63931
9	73360001	73370000	47	0.00122553	0.00040835	3.00118	1.58553	0.492463	2.88746
9	73380001	73390000	40	0.00220482	0.000541435	4.07218	2.0258	0.580057	4.28646
9	73420001	73430000	26	0.00112003	0.000342321	3.27187	1.71012	0.541189	3.4585
9	73430001	73440000	13	0.000737549	0.000103911	7.09789	2.82739	0.473841	2.91839
9	85840001	85850000	16	0.00195305	0.000225296	8.66882	3.11584	0.662224	5.36892
10	46090001	46100000	32	0.00141213	0.0004327	3.26353	1.70643	0.481419	2.39642
10	67380001	67390000	19	0.000936039	0.000259564	3.6062	1.85048	0.535228	4.41979
10	69450001	69460000	34	0.00209224	0.000405319	5.16196	2.36792	0.48348	2.63504
10	71460001	71470000	38	0.0020403	0.00045983	4.43707	2.14961	0.479441	3.59223
10	71470001	71480000	24	0.00179788	0.000357763	5.02534	2.32922	0.533385	3.04939
10	71490001	71500000	10	0.000612096	7.24147e-05	8.45265	3.0794	0.703613	4.63811
10	71510001	71520000	36	0.00195976	0.000379095	5.16957	2.37005	0.557374	3.48431
10	71520001	71530000	48	0.0024854	0.000480063	5.17724	2.37218	0.558569	4.10586
10	71530001	71540000	13	0.00136051	0.000188051	7.23479	2.85495	0.530722	4.34687
10	71540001	71550000	15	0.000993008	0.000176556	5.62432	2.49168	0.615109	3.86987
10	71560001	71570000	15	0.00156671	0.000148276	10.5662	3.40138	0.51171	2.50223
10	71580001	71590000	11	0.000570549	0.000101151	5.64057	2.49584	0.739361	2.44094
10	79170001	79180000	14	0.000595731	0.000191964	3.10335	1.63383	0.621893	10.6153
10	80510001	80520000	14	0.000512475	0.000175179	2.92544	1.54865	0.560342	3.58608
10	80520001	80530000	12	0.00116929	0.000188286	6.21018	2.63464	0.521074	2.73184
10	85080001	85090000	24	0.00180911	0.000326215	5.54576	2.47139	0.500698	3.5016
10	85090001	85100000	38	0.00188605	0.000437332	4.31263	2.10857	0.47763	5.63053
10	85190001	85200000	19	0.00106592	0.000223698	4.765	2.25247	0.504079	2.40711
10	85720001	85730000	31	0.00174907	0.000301407	5.80302	2.5368	0.531243	9.55511
10	87190001	87200000	23	0.00123804	0.000261613	4.73233	2.24255	0.545827	3.29142
10	93610001	93620000	11	0.000912346	0.000124143	7.34915	2.87758	0.557682	2.43459
10	95410001	95420000	85	0.0035595	0.00113102	3.14716	1.65405	0.593284	2.34778
11	500001	510000	25	0.00137562	0.000441856	3.11328	1.63843	0.546075	2.70551
11	14690001	14700000	19	0.00086601	0.000162075	5.34327	2.41772	0.497809	8.47563
11	14790001	14800000	15	0.00108455	0.000111496	9.72725	3.28203	0.59814	9.50498
11	14800001	14810000	11	0.000628723	7.86228e-05	7.9967	2.9994	0.69387	8.64855
11	14830001	14840000	21	0.00136582	0.000142998	9.55132	3.2557	0.533907	6.2556
11	15030001	15040000	11	0.00062813	9.81609e-05	6.39898	2.67784	0.68927	9.19022
11	15040001	15050000	10	0.000616535	7.77032e-05	7.93449	2.98814	0.51301	8.60731
11	15110001	15120000	12	0.00032347	9.81622e-05	3.29526	1.72039	0.770968	9.79097
11	15120001	15130000	13	0.000360634	9.28736e-05	3.88306	1.95719	0.770004	8.69192
11	15220001	15230000	15	0.000583348	0.000185517	3.14444	1.65281	0.47003	4.13588
11	15230001	15240000	16	0.000628043	0.000212876	2.95028	1.56085	0.550967	3.66983
11	15240001	15250000	10	0.000630576	0.000162535	3.87963	1.95592	0.538148	4.14932
11	16350001	16360000	23	0.00143585	0.00037614	3.81733	1.93256	0.536636	2.39953
11	16370001	16380000	12	0.00182952	0.000407142	4.49357	2.16786	0.563591	2.51961
11	60440001	60450000	12	0.000815871	0.000143222	5.69655	2.51009	0.491238	3.60338
11	66660001	66670000	21	0.0019847	0.00057432	3.45574	1.78899	0.518414	2.54375
11	67180001	67190000	16	0.000896408	0.000228515	3.92275	1.97187	0.469043	2.50076
11	72050001	72060000	23	0.00152324	0.000324668	4.69169	2.23011	0.561692	2.51018
11	96900001	96910000	21	0.00105545	0.000316112	3.33885	1.73935	0.480319	2.88158
11	96910001	96920000	17	0.000897296	0.000240239	3.73501	1.90111	0.51245	2.80079
12	9530001	9540000	15	0.000512205	0.000117019	4.37711	2.12998	0.594628	2.85335
12	33580001	33590000	33	0.00245905	0.000623021	3.94698	1.98075	0.467738	7.3039
12	33630001	33640000	14	0.00129389	0.000255879	5.05665	2.33818	0.533793	7.91985
12	33680001	33690000	10	0.000755933	0.000218859	3.45397	1.78826	0.615572	9.96674
12	33710001	33720000	14	0.00152243	0.000263002	5.78866	2.53323	0.481165	8.13141
12	33780001	33790000	15	0.00109154	0.000329213	3.3156	1.72927	0.475634	4.83474
12	33820001	33830000	13	0.00090951	0.000278398	3.26694	1.70794	0.513932	3.25493
12	33830001	33840000	13	0.000757259	0.000261163	2.89956	1.53584	0.479488	2.6312
12	50730001	50740000	29	0.00141178	0.000364847	3.86951	1.95215	0.639754	6.58568
12	50930001	50940000	12	0.000584448	0.000178858	3.26766	1.70826	0.517004	5.1977
12	51300001	51310000	14	0.00151536	0.000345995	4.37972	2.13084	0.495435	5.02234
12	51310001	51320000	10	0.00116284	0.000135862	8.55898	3.09744	0.621693	4.85977
12	51320001	51330000	15	0.000592257	0.000198856	2.97832	1.5745	0.537441	3.91891
12	51350001	51360000	11	0.000795271	0.000172887	4.59995	2.20162	0.551891	2.87833
12	83240001	83250000	22	0.00213985	0.000614325	3.48325	1.80044	0.681687	2.65858
12	83610001	83620000	16	0.000999717	0.000214718	4.65595	2.21908	0.507555	2.44394
13	3710001	3720000	23	0.00152397	0.00017794	8.56452	3.09837	0.506254	2.39393
13	12710001	12720000	20	0.000833047	0.000226454	3.67866	1.87918	0.501857	2.68966
13	21420001	21430000	26	0.00271351	0.000563715	4.81362	2.26712	0.471207	4.92172
13	21440001	21450000	12	0.000950326	0.000260696	3.64534	1.86605	0.472596	4.41481
13	22550001	22560000	17	0.000609546	0.000186911	3.26116	1.70538	0.474017	2.57538
13	26730001	26740000	17	0.000881933	0.000259839	3.39415	1.76305	0.485619	2.37606
13	27590001	27600000	19	0.00188219	0.00029267	6.4311	2.68507	0.48829	2.42837
13	30460001	30470000	32	0.00131319	0.000440006	2.98448	1.57748	0.522681	4.67142
13	31600001	31610000	21	0.00133719	0.000182766	7.3164	2.87113	0.470735	3.29212
13	39060001	39070000	15	0.00140976	0.00011012	12.802	3.6783	0.580773	4.24543
13	39070001	39080000	28	0.00174156	0.000279102	6.23987	2.64152	0.630888	4.27656
13	39080001	39090000	57	0.00213141	0.000419348	5.08268	2.34559	0.748906	4.45565
13	39090001	39100000	18	0.000832506	0.000124832	6.66901	2.73747	0.542264	3.59361
13	40130001	40140000	11	0.000764995	0.000204843	3.73454	1.90093	0.494753	6.51081
13	40160001	40170000	12	0.00086752	0.000242299	3.58037	1.84011	0.56769	5.30692
13	40410001	40420000	23	0.000961494	0.000331052	2.90436	1.53822	0.617363	3.8402
13	50440001	50450000	34	0.00196044	0.000249892	7.84515	2.9718	0.655038	2.60613
13	50500001	50510000	27	0.00127537	0.000229431	5.55884	2.47478	0.461934	5.79378
13	50520001	50530000	10	0.000537307	6.57488e-05	8.17212	3.03071	0.500481	9.04658
13	50540001	50550000	26	0.0010535	0.000181626	5.80038	2.53615	0.571171	7.03135
13	50550001	50560000	17	0.000724875	0.000151514	4.78421	2.25828	0.47582	11.7116
13	50560001	50570000	16	0.000828967	0.000153111	5.41416	2.43674	0.53387	16.4363
13	50570001	50580000	20	0.000759638	0.000154495	4.91691	2.29775	0.641569	15.3955
13	50690001	50700000	10	0.00138522	7.28736e-05	19.0085	4.24858	0.494222	6.44592
13	51330001	51340000	10	0.00044186	7.81619e-05	5.65314	2.49905	0.668918	3.32999
13	51340001	51350000	16	0.00038619	0.00011104	3.47794	1.79823	0.805381	2.39812
13	55480001	55490000	17	0.00349334	0.000376557	9.27706	3.21367	0.480804	2.58545
13	55510001	55520000	14	0.0024543	0.000168289	14.5838	3.8663	0.53521	2.7923
13	56180001	56190000	22	0.00211538	0.000517248	4.08968	2.03199	0.476836	10.2238
13	56400001	56410000	18	0.00222699	0.000122539	18.1737	4.18378	0.582237	10.6344
13	56410001	56420000	12	0.000798329	7.86238e-05	10.1538	3.34395	0.654361	9.64905
13	56480001	56490000	11	0.000751952	0.000135172	5.56293	2.47584	0.56406	7.22775
13	56500001	56510000	13	0.000639994	0.000196332	3.25975	1.70476	0.546668	6.6124
13	56900001	56910000	19	0.00104016	0.000162993	6.38162	2.67392	0.473882	12.264
13	57080001	57090000	11	0.000466228	0.000137013	3.4028	1.76672	0.668482	7.6692
13	57790001	57800000	11	0.000793286	0.000222316	3.56828	1.83523	0.574862	8.03661
13	58390001	58400000	31	0.00183644	0.000524388	3.50206	1.80821	0.493634	4.8149
13	58420001	58430000	16	0.00099292	0.000260003	3.81888	1.93315	0.508806	2.75707
13	58950001	58960000	15	0.00150384	0.000471041	3.19259	1.67473	0.537914	4.12261
13	59000001	59010000	15	0.00142118	0.000339085	4.19122	2.06737	0.491744	4.51791
13	59070001	59080000	13	0.000944688	0.000247589	3.81555	1.93189	0.509024	7.85487
13	59140001	59150000	34	0.00198179	0.000612944	3.23323	1.69298	0.465213	5.12045
13	59370001	59380000	11	0.000871659	0.000186906	4.66362	2.22145	0.546634	10.6657
13	59390001	59400000	16	0.00092694	0.000204606	4.53037	2.17963	0.50388	8.74484
13	59400001	59410000	12	0.000665316	0.000202989	3.2776	1.71264	0.568326	7.81869
13	59430001	59440000	15	0.000861456	0.000227589	3.78514	1.92035	0.468875	5.26989
13	59520001	59530000	81	0.00349143	0.000988672	3.53143	1.82025	0.585158	2.67778
13	60290001	60300000	15	0.00119807	0.000271278	4.41639	2.14287	0.530941	2.72158
13	60930001	60940000	13	0.00122538	9.05792e-05	13.5283	3.75791	0.48703	11.132
13	60940001	60950000	10	0.000850021	7.14961e-05	11.8891	3.57156	0.469938	10.4833
13	60950001	60960000	23	0.00172473	0.000169666	10.1654	3.3456	0.512568	9.29785
13	61030001	61040000	20	0.00118192	0.000235433	5.0202	2.32774	0.536399	6.41721
13	61050001	61060000	18	0.000728592	0.000215192	3.38578	1.75949	0.499012	6.20467
13	61060001	61070000	18	0.000578308	0.000194723	2.9699	1.57041	0.564553	6.58186
13	61080001	61090000	11	0.000527657	0.000162073	3.25567	1.70296	0.515089	8.33205
13	61150001	61160000	16	0.000949334	0.000232659	4.08037	2.0287	0.473908	7.92159
13	61170001	61180000	21	0.00103216	0.000331515	3.11346	1.63852	0.480197	6.49008
13	61210001	61220000	17	0.000843609	0.000265786	3.17402	1.66631	0.461308	4.81699
13	61270001	61280000	14	0.000687459	0.00016967	4.05174	2.01854	0.639435	4.61374
13	61280001	61290000	13	0.000613728	0.000114032	5.38207	2.42816	0.765344	4.28581
13	62720001	62730000	21	0.000935154	0.00017403	5.37352	2.42587	0.514448	4.59411
13	62760001	62770000	11	0.000704567	9.1954e-05	7.66217	2.93775	0.470626	5.48984
13	62860001	62870000	31	0.00201842	0.000691969	2.91692	1.54445	0.518287	8.50375
13	62920001	62930000	16	0.000992953	0.000261843	3.79217	1.92302	0.467827	9.20427
13	62930001	62940000	13	0.000871453	0.000257028	3.3905	1.7615	0.463478	8.63276
13	62940001	62950000	27	0.00133548	0.000401895	3.32296	1.73247	0.462644	8.09737
13	63150001	63160000	11	0.000791769	0.000194031	4.08063	2.02879	0.566619	12.3654
13	63170001	63180000	10	0.000823732	0.000228046	3.61213	1.85285	0.539091	13.4358
13	63330001	63340000	19	0.00121971	0.000293801	4.15148	2.05363	0.494458	8.4473
13	63340001	63350000	31	0.00106163	0.00030761	3.45122	1.78711	0.485751	8.46368
13	63350001	63360000	24	0.00103665	0.000270592	3.83104	1.93774	0.488519	9.35306
13	64620001	64630000	19	0.000703272	0.000228969	3.07147	1.61893	0.518893	3.13916
13	64820001	64830000	11	0.00118866	0.000131496	9.03951	3.17625	0.551392	4.47032
13	65760001	65770000	12	0.000703962	0.000220693	3.18978	1.67346	0.565757	2.38486
13	65970001	65980000	16	0.00106318	0.000201387	5.27929	2.40034	0.533626	3.30447
13	66000001	66010000	22	0.000649942	0.000188281	3.45198	1.78742	0.50815	2.75931
13	68510001	68520000	22	0.0024101	0.000447621	5.38424	2.42874	0.515724	5.36333
13	76840001	76850000	10	0.000907642	0.0002522	3.5989	1.84756	0.489378	5.32829
13	77260001	77270000	21	0.00152607	0.000235208	6.48817	2.69781	0.530943	4.50347
13	77270001	77280000	13	0.00100146	8.87447e-05	11.2847	3.4963	0.460584	3.64625
13	77280001	77290000	15	0.000397921	0.000109663	3.62858	1.85941	0.808985	2.79772
13	77680001	77690000	17	0.000572542	0.000184605	3.10144	1.63294	0.650171	5.07579
13	77690001	77700000	20	0.00139191	0.000208982	6.66043	2.73562	0.596305	4.53765
13	77710001	77720000	20	0.00105665	0.000357972	2.95177	1.56158	0.550402	3.74233
13	77730001	77740000	14	0.0009549	0.000320702	2.97753	1.57412	0.490598	2.94655
14	38930001	38940000	18	0.000618026	0.000177023	3.49122	1.80373	0.572865	2.37365
14	38960001	38970000	20	0.000747872	0.000240016	3.11593	1.63966	0.502661	2.90895
14	50520001	50530000	39	0.00224399	0.000311106	7.21294	2.85059	0.56234	3.75696
14	50530001	50540000	23	0.00192743	0.000222546	8.66082	3.1145	0.576321	3.10116
14	50540001	50550000	33	0.00168118	0.000234965	7.15502	2.83896	0.627584	2.52444
14	50770001	50780000	17	0.000855797	0.000162305	5.27277	2.39856	0.488912	2.90092
14	50810001	50820000	21	0.000914669	0.000228969	3.99473	1.9981	0.580325	3.72846
14	50840001	50850000	14	0.000662749	0.000189203	3.50285	1.80853	0.581379	3.26434
14	50850001	50860000	16	0.000746165	0.000169664	4.3979	2.13681	0.563117	3.14016
14	50860001	50870000	18	0.000677468	0.000169438	3.99832	1.9994	0.636164	3.46095
14	50870001	50880000	16	0.000704324	0.000145981	4.82476	2.27046	0.653963	2.955
14	50880001	50890000	12	0.000511401	0.000151498	3.37563	1.75516	0.673253	2.99818
14	51860001	51870000	14	0.00138129	0.000193793	7.12766	2.83343	0.463129	4.60635
14	51920001	51930000	10	0.00108148	0.000241162	4.48445	2.16493	0.534072	4.45126
14	66750001	66760000	22	0.0012961	0.000292654	4.42878	2.14691	0.51326	4.51606
15	6150001	6160000	10	0.000676119	0.000169204	3.99588	1.99851	0.537627	6.06176
15	6160001	6170000	13	0.000581038	0.000177954	3.2651	1.70713	0.46437	5.67919
15	6360001	6370000	10	0.000536156	0.000179092	2.99375	1.58195	0.616832	4.45493
15	6390001	6400000	10	0.000490495	0.000160234	3.06112	1.61406	0.469701	3.43731
15	6430001	6440000	10	0.00053603	0.000176786	3.03208	1.60031	0.524066	2.76695
15	23890001	23900000	12	0.00100967	0.000264385	3.81894	1.93317	0.518642	6.23276
15	24040001	24050000	31	0.00190428	0.000509478	3.73771	1.90215	0.628418	12.5451
15	24050001	24060000	12	0.000986332	0.000193336	5.10165	2.35096	0.561532	11.6976
15	24080001	24090000	15	0.000776234	0.000268293	2.89323	1.53268	0.5165	10.9265
15	24160001	24170000	10	0.000655878	0.000185984	3.52653	1.81825	0.591024	5.58075
15	24170001	24180000	11	0.000654961	0.000193116	3.39154	1.76194	0.502304	4.97592
15	32180001	32190000	12	0.00145162	0.000142069	10.2177	3.353	0.528196	5.43869
15	32200001	32210000	15	0.000862386	0.000178855	4.8217	2.26954	0.562345	3.89273
15	34140001	34150000	55	0.00235341	0.00076073	3.09362	1.6293	0.686942	3.37729
15	34150001	34160000	23	0.00108963	0.000280467	3.88506	1.95794	0.699465	3.70705
15	34160001	34170000	20	0.00104535	0.000262762	3.97831	1.99216	0.634636	2.82854
15	34630001	34640000	42	0.0019915	0.00066678	2.98674	1.57857	0.509156	2.33366
15	39790001	39800000	10	0.00110172	0.000279095	3.94747	1.98093	0.483736	2.57119
16	21570001	21580000	15	0.00120571	0.000272446	4.4255	2.14584	0.472705	2.37836
16	25270001	25280000	11	0.000920063	0.000221399	4.15568	2.05508	0.612234	2.89714
16	25630001	25640000	30	0.00242287	0.000665561	3.64034	1.86407	0.605674	10.0133
16	31960001	31970000	10	0.0010679	0.000346924	3.0782	1.62209	0.542336	2.67714
16	53650001	53660000	15	0.00107286	0.000277029	3.87274	1.95335	0.529117	3.62032
16	53660001	53670000	13	0.000864067	0.000249662	3.46095	1.79117	0.490946	3.2814
16	66510001	66520000	34	0.00262538	0.0002373	11.0635	3.46774	0.485492	2.48942
16	72040001	72050000	12	0.000670176	0.000143684	4.66424	2.22164	0.480368	2.76765
17	21120001	21130000	50	0.00274682	0.00075506	3.63788	1.8631	0.484556	2.53242
17	55910001	55920000	21	0.00224183	0.000317944	7.05102	2.81783	0.461885	3.74318
18	13210001	13220000	30	0.00124389	0.000417252	2.98115	1.57587	0.485928	5.16149
18	13280001	13290000	17	0.00129117	0.000124373	10.3814	3.37593	0.504864	2.8402
18	37630001	37640000	17	0.00105895	0.000125747	8.42127	3.07404	0.491295	3.46519
18	40480001	40490000	16	0.00219399	0.000493175	4.4487	2.15339	0.567045	2.50019
18	48900001	48910000	17	0.000873748	0.000290345	3.00934	1.58945	0.538221	7.77359
18	48910001	48920000	18	0.0010034	0.000240932	4.16466	2.0582	0.539108	7.71619
19	10830001	10840000	12	0.00107353	0.000244154	4.39694	2.1365	0.611335	3.40027
19	20020001	20030000	15	0.000692019	0.000186214	3.71626	1.89385	0.493858	3.28089
19	20050001	20060000	12	0.000655205	0.000186216	3.51852	1.81497	0.483821	3.17162
19	20400001	20410000	21	0.000658323	0.000220468	2.98603	1.57823	0.684142	8.1219
19	20410001	20420000	15	0.000623636	0.000122535	5.08945	2.34751	0.590408	8.0207
19	20440001	20450000	10	0.000494109	0.000103448	4.7764	2.25592	0.581808	6.03924
19	20450001	20460000	16	0.000918144	0.00012966	7.08117	2.82399	0.511799	5.07441
19	20470001	20480000	17	0.000976353	0.000214721	4.54708	2.18494	0.597711	7.78753
19	20480001	20490000	19	0.000898325	0.000237704	3.77917	1.91807	0.570266	7.79523
19	20490001	20500000	21	0.000555184	0.000176784	3.14047	1.65098	0.582879	7.26416
19	20500001	20510000	18	0.000853257	0.000144368	5.91029	2.56323	0.481392	6.68452
19	22420001	22430000	12	0.000547089	0.000187136	2.92348	1.54769	0.487683	10.6157
19	22430001	22440000	17	0.000910871	0.000271749	3.35188	1.74497	0.483423	10.1732
19	22480001	22490000	16	0.000773598	0.000234035	3.30548	1.72486	0.51817	7.30925
19	22490001	22500000	14	0.000729111	0.00018071	4.0347	2.01246	0.590918	7.25697
19	22670001	22680000	23	0.00112907	0.000380719	2.96563	1.56834	0.50537	11.2342
19	22780001	22790000	13	0.000845684	9.90805e-05	8.53532	3.09345	0.474177	16.182
19	22880001	22890000	10	0.000467521	0.000114944	4.06738	2.0241	0.500504	10.4175
19	22970001	22980000	10	0.000863471	0.000195415	4.41865	2.14361	0.483762	9.12574
19	23120001	23130000	16	0.000567098	0.00019518	2.90551	1.53879	0.655025	3.68849
19	23400001	23410000	11	0.000371575	0.000121848	3.0495	1.60857	0.574686	8.98401
19	23450001	23460000	21	0.00149888	0.000264188	5.67354	2.50425	0.518593	8.24036
19	23460001	23470000	11	0.000842432	0.000191494	4.39926	2.13726	0.505699	7.33103
19	23540001	23550000	32	0.00144689	0.000486699	2.97286	1.57185	0.486082	6.97556
19	23580001	23590000	18	0.00108659	0.000361407	3.00655	1.58811	0.507328	4.50493
19	25580001	25590000	19	0.00117007	0.000301859	3.87621	1.95465	0.483444	3.56206
19	25590001	25600000	15	0.000903054	0.000303226	2.97815	1.57442	0.491345	3.3172
19	26070001	26080000	15	0.000859753	0.000108281	7.94002	2.98914	0.55691	6.99004
19	26080001	26090000	17	0.00130653	0.00029981	4.35786	2.12362	0.538583	6.4936
19	34730001	34740000	18	0.00141836	0.000247373	5.73369	2.51946	0.556158	5.50536
19	34740001	34750000	18	0.00117718	0.00034851	3.37775	1.75606	0.48924	5.36368
19	37200001	37210000	12	0.000645418	0.000178168	3.62252	1.857	0.523717	2.33156
19	48580001	48590000	13	0.00074291	0.000177706	4.18056	2.0637	0.467456	5.95717
19	48610001	48620000	19	0.000721431	0.000230587	3.12867	1.64555	0.550144	5.55147
19	48630001	48640000	17	0.000770877	0.000184143	4.1863	2.06567	0.537173	4.45499
19	48650001	48660000	21	0.00128069	0.000255889	5.00487	2.32333	0.608198	3.23824
19	48660001	48670000	21	0.00108101	0.000184157	5.87005	2.55337	0.593454	2.50388
19	51050001	51060000	11	0.000622723	0.000195642	3.18297	1.67037	0.611959	2.86124
20	25500001	25510000	10	0.000526718	6.57488e-05	8.01107	3.00199	0.48313	4.94962
20	25510001	25520000	13	0.000673538	9.90805e-05	6.79789	2.76509	0.585542	3.97717
20	27300001	27310000	13	0.00274849	0.00041452	6.63054	2.72913	0.473737	5.56319
20	27320001	27330000	18	0.00355591	0.000709922	5.00887	2.32449	0.483607	4.83261
20	30690001	30700000	15	0.00127279	0.000307844	4.13453	2.04772	0.525935	2.6067
20	38850001	38860000	22	0.00140453	0.000397022	3.53766	1.8228	0.526028	6.20731
20	38900001	38910000	25	0.00161679	0.000166209	9.72745	3.28206	0.599948	6.61629
20	38910001	38920000	32	0.00292651	0.000289659	10.1033	3.33675	0.635542	6.08035
20	38950001	38960000	61	0.00393943	0.000478186	8.23828	3.04234	0.533578	5.33517
20	38970001	38980000	15	0.000854047	0.000116328	7.34171	2.87612	0.569654	4.07013
20	50640001	50650000	21	0.000993185	0.000251751	3.94511	1.98006	0.637259	5.42499
20	50650001	50660000	27	0.00128447	0.000201163	6.38522	2.67474	0.781279	5.5427
20	50670001	50680000	12	0.000768213	9.40315e-05	8.16974	3.03029	0.593196	3.93327
20	53600001	53610000	47	0.00255047	0.000810568	3.14652	1.65376	0.468476	2.92493
20	53620001	53630000	11	0.000875715	9.40279e-05	9.31335	3.2193	0.538738	4.18587
20	53640001	53650000	18	0.00171457	0.00017748	9.66064	3.27212	0.557227	3.52493
20	53650001	53660000	18	0.00062162	0.000185524	3.35062	1.74443	0.558592	2.9352
20	57030001	57040000	47	0.00212724	0.000718888	2.95907	1.56514	0.527704	2.82244
20	57060001	57070000	21	0.00238885	0.000362313	6.59333	2.72101	0.705552	2.34062
20	57070001	57080000	17	0.00152298	0.000283926	5.364	2.42331	0.631538	3.03119
20	58580001	58590000	15	0.00272377	0.000374493	7.27322	2.86259	0.532185	3.22637
20	58590001	58600000	22	0.00218039	0.000572691	3.80727	1.92876	0.507971	2.4864
20	70610001	70620000	33	0.00169638	0.000548124	3.09488	1.62989	0.480269	2.42436
21	10580001	10590000	30	0.00113537	0.000318205	3.56805	1.83513	0.561528	4.51909
21	10590001	10600000	34	0.00146316	0.000458905	3.18837	1.67282	0.565859	4.64288
21	10730001	10740000	26	0.00385598	0.000539393	7.14874	2.83769	0.542589	3.79127
21	10860001	10870000	17	0.00152634	0.000162303	9.40426	3.23331	0.481512	7.84101
21	10870001	10880000	14	0.00119553	9.24162e-05	12.9364	3.69336	0.580125	7.04335
21	16850001	16860000	14	0.000841712	0.000123452	6.81813	2.76938	0.627619	2.61105
21	19640001	19650000	80	0.00339555	0.00107823	3.14919	1.65498	0.541124	3.78616
21	41740001	41750000	15	0.00228029	0.000526646	4.32983	2.11431	0.514921	2.63556
21	59430001	59440000	14	0.000727437	0.000159315	4.56603	2.19094	0.573959	3.42925
21	67250001	67260000	16	0.00128271	0.000197257	6.50274	2.70105	0.531597	2.83154
21	67280001	67290000	26	0.00120648	0.000356115	3.38789	1.76039	0.541941	6.7233
21	67290001	67300000	14	0.00111857	0.000153833	7.27133	2.86222	0.467392	6.61084
21	67300001	67310000	12	0.000543119	0.00014023	3.87306	1.95347	0.667137	6.00779
21	67340001	67350000	10	0.000762993	0.000136555	5.58744	2.48219	0.519006	3.33838
21	67360001	67370000	13	0.000581576	0.000174743	3.32818	1.73473	0.633652	2.53874
22	10290001	10300000	22	0.000975334	0.000253117	3.85329	1.94609	0.479089	2.3773
22	10320001	10330000	21	0.000860327	0.000237953	3.61553	1.85421	0.620821	3.20326
22	10330001	10340000	13	0.000733569	0.000127141	5.76973	2.5285	0.657051	3.12158
22	10340001	10350000	14	0.000700833	0.000121154	5.78465	2.53223	0.671823	2.45523
22	10380001	10390000	31	0.00104754	0.000220047	4.76053	2.25112	0.728544	2.39631
22	10390001	10400000	19	0.00141603	0.000174947	8.09405	3.01686	0.577798	2.37591
22	11940001	11950000	29	0.00217691	0.000242783	8.96648	3.16454	0.492683	2.42722
22	15250001	15260000	28	0.00188314	0.000210837	8.93173	3.15894	0.613845	4.0793
22	15280001	15290000	17	0.00240228	0.000201168	11.9417	3.57793	0.577717	4.00629
22	16630001	16640000	15	0.00121168	0.000130575	9.27957	3.21406	0.465932	6.9595
22	16640001	16650000	21	0.00130916	0.000215643	6.07096	2.60192	0.47848	6.9452
22	16650001	16660000	20	0.000926826	0.000183237	5.05807	2.33859	0.510089	8.12644
22	16670001	16680000	22	0.00130737	0.000207362	6.30477	2.65644	0.47765	8.61547
22	16700001	16710000	31	0.000932839	0.000275898	3.3811	1.75749	0.577071	6.15313
22	17100001	17110000	13	0.000482963	0.000147818	3.26728	1.70809	0.474227	12.3802
22	17130001	17140000	11	0.000687031	7.81639e-05	8.78962	3.1358	0.562411	12.6908
22	17260001	17270000	16	0.0011457	0.000114953	9.96668	3.31711	0.520678	8.76939
22	28890001	28900000	15	0.00101619	0.000350381	2.90024	1.53617	0.546108	8.43607
22	28920001	28930000	17	0.00117695	0.000217017	5.42331	2.43917	0.563714	7.37532
22	28930001	28940000	11	0.00180362	0.000209906	8.59251	3.10308	0.602416	6.88575
22	28940001	28950000	10	0.00168662	0.000141611	11.9102	3.57413	0.594458	6.73521
22	28970001	28980000	18	0.000940337	0.000315653	2.97902	1.57484	0.523486	5.82669
22	28980001	28990000	19	0.000914346	0.000312878	2.92237	1.54714	0.49213	6.05914
22	29000001	29010000	12	0.000584791	0.000188278	3.106	1.63506	0.491908	5.59366
22	29130001	29140000	11	0.000467721	0.000143218	3.2658	1.70744	0.618298	2.78952
22	45450001	45460000	30	0.00152524	0.000342781	4.4496	2.15368	0.470612	3.60961
22	58960001	58970000	36	0.00292323	0.000501327	5.83098	2.54374	0.473535	3.01583
22	58970001	58980000	37	0.00197297	0.000516736	3.81814	1.93287	0.47186	2.42417
23	8780001	8790000	26	0.000949672	0.000316794	2.99776	1.58388	0.555793	4.13671
23	8800001	8810000	12	0.000641207	0.000150349	4.26479	2.09247	0.483893	3.99573
23	8810001	8820000	12	0.00070502	0.000110576	6.37589	2.67263	0.638138	3.89809
23	8820001	8830000	21	0.000800903	0.000237257	3.37568	1.75518	0.661173	2.9857
23	32000001	32010000	18	0.000761653	0.000259593	2.93403	1.55288	0.537686	2.96767
23	48570001	48580000	40	0.00179591	0.000539638	3.32799	1.73465	0.637031	2.73839
24	1160001	1170000	34	0.00139471	0.000451335	3.09019	1.62769	0.491401	2.39791
24	17950001	17960000	37	0.00170312	0.00047644	3.57468	1.83781	0.584745	4.71241
24	17970001	17980000	24	0.00118878	0.000314503	3.77987	1.91834	0.521791	3.87262
24	48740001	48750000	59	0.00398774	0.000521662	7.6443	2.93438	0.515293	5.30436
24	53000001	53010000	10	0.00191538	0.000130348	14.6944	3.87719	0.517431	2.37422
24	53760001	53770000	42	0.00184161	0.000455471	4.04331	2.01554	0.487397	2.83033
24	53770001	53780000	46	0.00239282	0.000353572	6.76756	2.75864	0.629408	2.82357
24	53790001	53800000	25	0.00148891	0.000320008	4.65273	2.21808	0.50572	2.38558
24	60770001	60780000	17	0.0010858	0.000279088	3.89053	1.95997	0.506563	3.31686
24	60790001	60800000	20	0.00101623	0.000311047	3.26713	1.70802	0.514581	2.75381
25	3300001	3310000	15	0.00234733	0.000346941	6.76579	2.75826	0.593656	3.59911
25	3370001	3380000	12	0.00205999	0.000297083	6.93406	2.7937	0.63569	4.37431
25	3390001	3400000	11	0.000813488	0.000256562	3.17073	1.66481	0.466832	3.36382
25	33340001	33350000	19	0.00080802	0.000192431	4.19901	2.07005	0.482641	2.7968
26	38500001	38510000	17	0.00202811	0.000193338	10.49	3.39094	0.524147	2.74352
27	3260001	3270000	17	0.001971	0.000382314	5.15545	2.3661	0.504382	3.26417
27	17530001	17540000	10	0.000634623	0.000169428	3.74568	1.90523	0.586362	3.09786
28	1980001	1990000	13	0.00103116	0.000195867	5.26459	2.39632	0.573621	4.56062
28	1990001	2000000	19	0.00130406	0.000216793	6.01523	2.58862	0.471711	4.63095
28	2000001	2010000	26	0.00108305	0.000340996	3.17614	1.66727	0.483568	3.95638
28	2020001	2030000	14	0.000952747	0.000147164	6.47405	2.69467	0.481605	3.06687
28	2030001	2040000	21	0.00190775	0.000163912	11.6389	3.54088	0.527114	2.57068
28	3060001	3070000	17	0.000953962	0.000302774	3.15074	1.65569	0.489132	3.23854
28	3570001	3580000	22	0.00107156	0.000268057	3.99751	1.9991	0.551612	6.34598
28	3580001	3590000	29	0.0021001	0.000230575	9.1081	3.18715	0.500048	5.96953
28	3590001	3600000	31	0.00140379	0.000300008	4.67918	2.22625	0.5491	6.61864
28	3630001	3640000	15	0.00150982	0.000112414	13.4309	3.74748	0.568003	6.28733
28	3670001	3680000	38	0.00122872	0.000326485	3.76348	1.91207	0.705797	3.57254
28	3710001	3720000	16	0.000795326	0.000274511	2.89725	1.53468	0.665982	3.47067
28	19710001	19720000	42	0.00193587	0.000455026	4.25442	2.08896	0.506039	2.85232
28	23320001	23330000	62	0.00345282	0.000794357	4.34669	2.11992	0.474292	2.3923
28	23380001	23390000	62	0.00363364	0.000932331	3.89737	1.9625	0.545274	2.99295
28	23900001	23910000	75	0.00417256	0.000756993	5.51202	2.46258	0.5136	2.71969
28	24450001	24460000	89	0.00405218	0.00134818	3.00567	1.58769	0.574041	3.44035
28	24490001	24500000	59	0.0062436	0.000874893	7.13642	2.8352	0.518945	2.79593
28	24520001	24530000	27	0.00184384	0.000370613	4.97511	2.31473	0.59651	4.51279
28	24530001	24540000	16	0.00154663	0.00026738	5.78439	2.53216	0.513991	3.79971
28	24540001	24550000	23	0.00230163	0.000407372	5.64995	2.49824	0.540086	3.02981
28	24550001	24560000	11	0.00706588	0.000162771	43.4099	5.43995	0.502974	2.45534
28	24560001	24570000	23	0.00609425	0.000361186	16.8729	4.07663	0.486803	2.47749
28	24570001	24580000	18	0.00104233	0.000289889	3.59562	1.84624	0.526727	2.64238
28	24580001	24590000	15	0.00121761	0.000191047	6.37335	2.67205	0.470744	2.80189
28	24880001	24890000	46	0.0025319	0.00083603	3.02848	1.59859	0.540776	3.16355
28	31890001	31900000	16	0.00218527	0.000339127	6.44381	2.68791	0.525306	3.59484
28	39790001	39800000	56	0.00284739	0.000946571	3.00811	1.58886	0.581706	3.27811

## Sheet: S6-2
Table S6-2 Summary of the positive selective sweep regions identified in Jintang Black goats
Chr	Starting position	Ending position	SNP number	BI Pi	JT Pi	θπ ratio	log2(θπ ratio)	Weir_Fst	iHH12
1	8310001	8320000	15	0.00108885	0.000354932	3.06777	1.61719	0.402687	2.81124
1	20630001	20640000	12	0.00059224	0.000194134	3.05068	1.60913	0.396522	4.37511
1	27890001	27900000	87	0.00451065	0.00186629	2.41691	1.27316	0.409777	2.26767
1	32670001	32680000	20	0.00110774	0.000388939	2.84811	1.51	0.434755	5.30372
1	33870001	33880000	15	0.000730437	0.000314393	2.32332	1.21619	0.498056	2.92242
1	43960001	43970000	12	0.000535313	0.000243812	2.1956	1.13461	0.455762	21.6607
1	44010001	44020000	11	0.00103095	0.000275823	3.73772	1.90216	0.424983	13.756
1	44060001	44070000	13	0.000637783	0.000281058	2.26922	1.1822	0.450724	8.6402
1	44230001	44240000	14	0.00153088	0.000351649	4.35343	2.12215	0.529662	4.51856
1	51510001	51520000	16	0.00095776	0.000205887	4.65187	2.21781	0.387437	6.40497
1	51530001	51540000	21	0.000933691	0.000357539	2.61144	1.38484	0.438179	4.50952
1	51540001	51550000	23	0.000992999	0.000328765	3.02039	1.59474	0.453475	2.60869
1	52010001	52020000	15	0.000897006	0.000223549	4.01257	2.00453	0.544347	8.56093
1	52040001	52050000	13	0.000830004	0.000164052	5.0594	2.33897	0.582292	5.17041
1	74050001	74060000	12	0.000901586	0.000151634	5.9458	2.57187	0.405302	8.54192
1	74060001	74070000	15	0.00086952	0.000238562	3.64484	1.86585	0.540942	7.59721
1	74070001	74080000	18	0.00115707	0.000198697	5.82329	2.54183	0.556094	7.43196
1	79400001	79410000	38	0.00249736	0.00113147	2.20718	1.14221	0.386899	3.54004
1	79540001	79550000	12	0.00110466	0.000279762	3.94857	1.98133	0.466222	2.16506
1	85020001	85030000	11	0.000526404	0.00015033	3.50166	1.80804	0.498769	8.12195
1	85050001	85060000	18	0.00110798	0.000317007	3.49513	1.80535	0.527418	7.05844
1	85060001	85070000	13	0.00061407	0.00023726	2.58817	1.37193	0.609859	9.7933
1	85110001	85120000	11	0.000640198	0.000217652	2.94138	1.55649	0.431876	3.32953
1	95030001	95040000	11	0.000870913	0.000240543	3.62061	1.85623	0.516813	2.97608
1	100890001	100900000	12	0.00086309	0.00021373	4.03823	2.01372	0.46609	2.06774
1	107030001	107040000	10	0.00072687	0.000141833	5.12483	2.3575	0.388203	4.42195
1	109050001	109060000	13	0.000668563	0.000245762	2.72037	1.4438	0.728569	2.58115
1	109140001	109150000	17	0.000922334	0.000386953	2.38358	1.25313	0.460258	8.76732
1	109160001	109170000	14	0.00098189	0.000240549	4.08187	2.02923	0.409232	6.83219
1	109170001	109180000	12	0.000518356	0.000186936	2.77291	1.4714	0.548072	4.91197
1	109200001	109210000	13	0.000668679	0.000271259	2.46509	1.30164	0.50366	6.95067
1	109250001	109260000	10	0.00105832	0.000251634	4.20579	2.07238	0.390281	5.833
1	114370001	114380000	29	0.00162418	0.000725567	2.2385	1.16253	0.392589	5.02571
2	2540001	2550000	18	0.000891447	0.000398074	2.2394	1.16311	0.433254	7.77256
2	2560001	2570000	18	0.000846149	0.000288235	2.93562	1.55367	0.388149	5.56777
2	10580001	10590000	18	0.00107934	0.000375211	2.87662	1.52438	0.489564	7.25332
2	10610001	10620000	31	0.00177838	0.000781096	2.27678	1.18699	0.392957	4.51588
2	14550001	14560000	17	0.00109998	0.000496753	2.21434	1.14688	0.407012	2.18182
2	21280001	21290000	57	0.00314263	0.000888985	3.53508	1.82174	0.407535	14.1935
2	21300001	21310000	30	0.00162046	0.000439869	3.68396	1.88126	0.614682	12.664
2	21310001	21320000	17	0.0034458	0.000241191	14.2866	3.83659	0.51026	10.3945
2	21320001	21330000	38	0.00268286	0.000505251	5.30995	2.4087	0.497612	8.43888
2	21330001	21340000	39	0.0018361	0.00061702	2.97575	1.57326	0.399243	7.73709
2	21370001	21380000	55	0.00258069	0.00108574	2.3769	1.24908	0.496382	5.95299
2	30210001	30220000	42	0.0019799	0.000814034	2.43221	1.28227	0.436328	2.49903
2	30230001	30240000	14	0.000863082	0.000267326	3.22857	1.6909	0.48295	3.2923
2	31310001	31320000	26	0.00258748	0.000512429	5.04944	2.33612	0.390856	8.41579
2	35550001	35560000	18	0.00127668	0.000204593	6.2401	2.64157	0.521521	2.28539
2	36550001	36560000	65	0.00317592	0.00134197	2.36661	1.24282	0.44289	2.03642
2	49930001	49940000	29	0.00134664	0.000590258	2.28144	1.18995	0.5648	5.04922
2	49940001	49950000	29	0.00123874	0.000524315	2.36259	1.24037	0.53802	4.16448
2	67620001	67630000	46	0.00325826	0.000836929	3.89311	1.96092	0.451975	4.04131
2	67630001	67640000	15	0.00242959	0.000308523	7.87491	2.97726	0.395864	3.90488
2	67640001	67650000	17	0.00560249	0.000368006	15.2239	3.92827	0.391247	3.75045
2	67660001	67670000	77	0.00519442	0.00130799	3.9713	1.98961	0.460651	3.52937
2	68320001	68330000	19	0.00127286	0.000561486	2.26695	1.18075	0.430279	2.13514
2	74480001	74490000	12	0.0022718	0.000478452	4.74823	2.24739	0.430585	7.63683
2	74690001	74700000	34	0.00184158	0.000680466	2.70635	1.43635	0.61686	7.71608
2	74730001	74740000	55	0.00288938	0.00115999	2.49087	1.31665	0.424698	6.14923
2	74850001	74860000	17	0.000995043	0.000409168	2.43187	1.28207	0.473014	10.635
2	75710001	75720000	21	0.00100104	0.000445108	2.24898	1.16927	0.511882	2.4784
2	86960001	86970000	20	0.00179013	0.000264734	6.762	2.75745	0.412584	5.98965
2	97380001	97390000	22	0.000832319	0.000353625	2.35368	1.23492	0.413413	3.3016
3	14560001	14570000	10	0.000449843	0.000198697	2.26396	1.17885	0.619456	3.47995
3	21200001	21210000	19	0.00143476	0.000305242	4.7004	2.23278	0.389847	4.11649
3	23600001	23610000	22	0.00134545	0.000299359	4.49444	2.16814	0.45403	9.67089
3	23610001	23620000	15	0.000837438	0.000262092	3.19521	1.67591	0.584578	9.66012
3	23620001	23630000	13	0.00146836	0.000219621	6.68588	2.74112	0.459237	7.67485
3	23630001	23640000	20	0.00150539	0.000294124	5.11822	2.35564	0.453902	5.69401
3	23640001	23650000	31	0.00362697	0.000382361	9.48572	3.24576	0.384993	4.45357
3	23650001	23660000	14	0.00251522	0.00018105	13.8924	3.79622	0.402931	3.1248
3	23710001	23720000	13	0.000551624	0.000194133	2.84147	1.50664	0.539001	13.109
3	23720001	23730000	31	0.00106058	0.000412445	2.57145	1.36258	0.507127	11.0383
3	23760001	23770000	10	0.0007336	0.000146412	5.01052	2.32496	0.382864	4.83358
3	23810001	23820000	29	0.00138206	0.000498071	2.77483	1.4724	0.462293	4.12121
3	24260001	24270000	16	0.000859855	0.000360177	2.38731	1.25539	0.446635	2.70702
3	38230001	38240000	24	0.00182099	0.000641888	2.83693	1.50433	0.403422	3.49371
3	38240001	38250000	22	0.0013753	0.000457526	3.00595	1.58782	0.457967	2.88559
3	38630001	38640000	14	0.000817599	0.000198714	4.11445	2.0407	0.488998	5.66797
3	38690001	38700000	32	0.000956991	0.000415077	2.30557	1.20513	0.759392	2.56274
3	38700001	38710000	65	0.00188555	0.00079838	2.36172	1.23984	0.751564	2.31575
3	38830001	38840000	17	0.000793556	0.000327502	2.42306	1.27683	0.393626	10.5095
3	38870001	38880000	14	0.000900549	0.000273874	3.28819	1.71729	0.420441	9.87468
3	38890001	38900000	20	0.00111201	0.000386961	2.8737	1.52291	0.439427	6.13244
3	39130001	39140000	11	0.00115772	0.000349688	3.31072	1.72715	0.400818	4.18846
3	39180001	39190000	10	0.00239713	0.00048171	4.97629	2.31507	0.427135	2.68675
3	46090001	46100000	73	0.0038883	0.00145788	2.66709	1.41527	0.451928	7.01236
3	46100001	46110000	27	0.00134492	0.000536669	2.50605	1.32542	0.514752	5.32802
3	46110001	46120000	22	0.00110419	0.000443837	2.48783	1.31489	0.500509	5.90497
3	46120001	46130000	11	0.000850435	0.000365367	2.32762	1.21885	0.392012	5.09422
3	58840001	58850000	14	0.001113	0.00029281	3.8011	1.92642	0.457854	13.2977
3	58850001	58860000	50	0.00334921	0.00130531	2.56583	1.35943	0.488437	12.2281
3	61070001	61080000	31	0.00283982	0.000993676	2.85789	1.51495	0.456205	2.53224
3	61120001	61130000	25	0.00527657	0.000503311	10.4837	3.39008	0.477919	7.98136
3	61130001	61140000	11	0.0113194	0.000205233	55.1539	5.78539	0.406987	7.33689
3	61150001	61160000	12	0.00185013	0.000324844	5.69544	2.50981	0.418497	5.4058
3	79570001	79580000	126	0.00557044	0.00198116	2.81171	1.49145	0.421301	2.39628
3	80620001	80630000	14	0.00068879	0.000206536	3.33496	1.73767	0.399362	8.62698
3	80660001	80670000	15	0.000587036	0.000192169	3.05479	1.61107	0.428167	11.1252
3	80740001	80750000	11	0.000625935	0.000185632	3.37191	1.75357	0.54218	6.5282
3	80760001	80770000	12	0.000985528	0.000133333	7.39148	2.88586	0.425335	5.36345
3	80770001	80780000	12	0.00115393	0.000175163	6.58775	2.71979	0.437172	3.4376
3	83820001	83830000	48	0.00193021	0.000833	2.31718	1.21237	0.441611	4.72269
3	87090001	87100000	13	0.00116985	0.000144444	8.09899	3.01774	0.478083	5.75436
3	87100001	87110000	11	0.000645907	0.00014183	4.55409	2.18716	0.418277	10.0405
3	87130001	87140000	15	0.000673422	0.000231373	2.91055	1.54129	0.598948	6.98875
3	87140001	87150000	11	0.000524884	0.00012811	4.09714	2.03462	0.637161	5.33328
3	87160001	87170000	12	0.000508493	0.000158824	3.20161	1.6788	0.674292	5.18326
3	87170001	87180000	11	0.000791536	0.000224198	3.53052	1.81988	0.505302	4.14939
3	87180001	87190000	23	0.00123877	0.000321615	3.85172	1.9455	0.458953	3.25799
3	92180001	92190000	19	0.00133933	0.000495557	2.70268	1.43439	0.389194	2.76876
3	95660001	95670000	21	0.00150823	0.000634709	2.37625	1.24869	0.475923	4.61117
3	95760001	95770000	57	0.00266717	0.000989719	2.69488	1.43022	0.445825	3.08566
3	96540001	96550000	15	0.0008509	0.000343152	2.47966	1.31014	0.496304	3.12565
3	96580001	96590000	27	0.00193718	0.00064119	3.02123	1.59513	0.48875	4.11483
3	96660001	96670000	13	0.00153898	0.000341205	4.51043	2.17326	0.447481	4.83849
3	96760001	96770000	10	0.000954311	0.000173214	5.50943	2.4619	0.401196	4.69991
3	96770001	96780000	11	0.00247419	0.000122222	20.2434	4.33938	0.402097	3.00877
3	100220001	100230000	15	0.000982606	0.000393492	2.49714	1.32028	0.601745	5.90116
3	100230001	100240000	14	0.00123276	0.000355563	3.46706	1.79371	0.571542	4.90061
3	100240001	100250000	15	0.00107056	0.000300667	3.56062	1.83213	0.621842	3.76208
3	100270001	100280000	49	0.00236449	0.0010316	2.29206	1.19665	0.504494	2.06345
3	110900001	110910000	10	0.000810412	0.000303954	2.66623	1.4148	0.435596	2.50554
3	110920001	110930000	20	0.00104571	0.000411137	2.54346	1.34679	0.447545	3.30458
3	110940001	110950000	14	0.000406628	0.000165359	2.45906	1.29811	0.500278	4.14443
3	111750001	111760000	13	0.000701858	0.000273856	2.56287	1.35776	0.403766	3.35114
3	111760001	111770000	14	0.000635912	0.000223539	2.84475	1.5083	0.507743	3.15853
4	2500001	2510000	15	0.00063741	0.000266672	2.39024	1.25716	0.557525	4.76382
4	2510001	2520000	11	0.000733477	0.000212418	3.45299	1.78785	0.503002	4.19215
4	2520001	2530000	10	0.000480836	0.000188235	2.55445	1.35301	0.546556	2.72361
4	6170001	6180000	16	0.000779944	0.000312482	2.49596	1.3196	0.453161	2.1034
4	19640001	19650000	32	0.0022331	0.000365359	6.11207	2.61166	0.459215	4.91359
4	19650001	19660000	15	0.000934788	0.000305882	3.05604	1.61166	0.472892	6.84877
4	19670001	19680000	29	0.00085136	0.00037844	2.24966	1.1697	0.502154	7.81292
4	19680001	19690000	29	0.00150244	0.000398048	3.77452	1.91629	0.432227	6.50195
4	19690001	19700000	48	0.00233499	0.000653026	3.57565	1.8382	0.414557	4.68677
4	19710001	19720000	23	0.00134021	0.000331394	4.04416	2.01584	0.550849	3.80456
4	19720001	19730000	12	0.000863796	0.000152941	5.6479	2.49772	0.520998	2.09494
4	21540001	21550000	18	0.0010989	0.000406562	2.70291	1.43451	0.435629	3.39818
4	21550001	21560000	19	0.000751118	0.000343806	2.18471	1.12744	0.433664	2.74151
4	23590001	23600000	19	0.000906646	0.00040787	2.22288	1.15243	0.386922	4.817
4	23680001	23690000	57	0.00213303	0.00086941	2.45342	1.2948	0.465181	3.102
4	25150001	25160000	11	0.000711087	0.000277136	2.56584	1.35943	0.610507	3.50851
4	28730001	28740000	22	0.00174637	0.000496753	3.51557	1.81376	0.440515	3.07108
4	28750001	28760000	22	0.00183872	0.000494771	3.71631	1.89387	0.509905	4.35256
4	28760001	28770000	11	0.00257683	0.000197411	13.0531	3.70632	0.3871	5.45278
4	29020001	29030000	22	0.00200634	0.000416382	4.81851	2.26859	0.698186	3.12162
4	29030001	29040000	70	0.00206516	0.000868129	2.37886	1.25027	0.505251	2.35031
4	29050001	29060000	30	0.00272747	0.000424209	6.42954	2.68472	0.453791	3.14086
4	40310001	40320000	16	0.00154647	0.000383031	4.03745	2.01345	0.58414	2.14742
4	40320001	40330000	11	0.00103839	0.000286965	3.61852	1.8554	0.509165	2.8115
4	41630001	41640000	38	0.0018973	0.000627544	3.02337	1.59616	0.433146	2.70734
4	42970001	42980000	12	0.000502605	0.000216349	2.32312	1.21606	0.571988	17.1229
4	43030001	43040000	18	0.000986933	0.000347727	2.83824	1.505	0.448689	10.8489
4	43050001	43060000	13	0.000797722	0.000321576	2.48066	1.31073	0.502097	9.63531
4	64580001	64590000	18	0.00133565	0.000573917	2.32725	1.21863	0.510333	2.70597
4	72230001	72240000	30	0.0018481	0.000392193	4.71222	2.23641	0.465703	5.93145
4	72240001	72250000	31	0.0026375	0.000875968	3.01095	1.59022	0.481628	6.01466
4	72280001	72290000	12	0.000724875	0.000186928	3.87783	1.95525	0.403023	4.77932
4	74180001	74190000	21	0.00114493	0.000454922	2.51676	1.33157	0.388157	3.29759
4	74270001	74280000	41	0.00208765	0.000869953	2.39973	1.26287	0.410472	3.38224
4	76080001	76090000	28	0.00182844	0.000511166	3.577	1.83875	0.419493	4.07506
4	81470001	81480000	14	0.000792712	0.000296751	2.6713	1.41754	0.443055	3.36587
4	81480001	81490000	16	0.000905161	0.000343845	2.63247	1.39642	0.46747	2.19359
4	88530001	88540000	24	0.00124266	0.000518995	2.39436	1.25964	0.443888	6.83353
4	89980001	89990000	12	0.0011504	0.000259488	4.43335	2.1484	0.391989	2.43816
4	106370001	106380000	11	0.00101294	0.000296745	3.4135	1.77125	0.425667	4.06831
4	106380001	106390000	20	0.00114272	0.00037388	3.05638	1.61182	0.488692	4.56475
4	107250001	107260000	27	0.00102487	0.000418362	2.44972	1.29262	0.402488	3.59733
4	107260001	107270000	18	0.00098912	0.000277124	3.56923	1.83561	0.445147	2.41296
4	110520001	110530000	18	0.00107971	0.000410475	2.63039	1.39528	0.391543	3.55766
4	110530001	110540000	11	0.000931902	0.000222227	4.19347	2.06814	0.52457	2.51392
5	15470001	15480000	18	0.00427181	0.000367374	11.628	3.53953	0.39605	2.78052
5	15520001	15530000	11	0.00334918	0.000239874	13.9622	3.80346	0.400487	2.36785
5	15630001	15640000	11	0.00117771	0.000132026	8.92029	3.15709	0.581872	12.1052
5	15640001	15650000	17	0.0021565	0.000213076	10.1208	3.33925	0.535965	9.6136
5	15650001	15660000	11	0.000750227	0.000122222	6.13823	2.61782	0.47027	10.8898
5	15680001	15690000	20	0.00171534	0.00024183	7.09316	2.82643	0.476237	4.17385
5	15690001	15700000	33	0.00208144	0.000441251	4.71713	2.23791	0.415528	2.924
5	15700001	15710000	20	0.00140172	0.000280426	4.99854	2.32151	0.41893	4.23412
5	15710001	15720000	13	0.00102605	0.000300667	3.41258	1.77086	0.552809	4.85032
5	18530001	18540000	23	0.00281751	0.000281058	10.0247	3.32548	0.500312	6.68593
5	18540001	18550000	10	0.00221647	0.00023726	9.34195	3.22372	0.552786	9.81394
5	18550001	18560000	27	0.0024117	0.000495498	4.86722	2.2831	0.504005	8.43837
5	18560001	18570000	25	0.00359196	0.000443839	8.09293	3.01666	0.527564	7.62537
5	18570001	18580000	19	0.00285198	0.000262108	10.8809	3.44373	0.585296	7.21896
5	18610001	18620000	12	0.000842873	0.000133333	6.32156	2.66028	0.48089	2.91683
5	18670001	18680000	13	0.000583624	0.000198048	2.94688	1.55919	0.475096	4.26741
5	18750001	18760000	28	0.00162374	0.000407198	3.98759	1.99552	0.407961	4.34198
5	18770001	18780000	11	0.000777592	0.000209817	3.70605	1.88988	0.439222	2.54079
5	19010001	19020000	29	0.00143762	0.000560155	2.56647	1.35978	0.392317	5.03469
5	33110001	33120000	26	0.00120391	0.000352288	3.4174	1.7729	0.418913	17.6565
5	33130001	33140000	10	0.00117735	0.000120915	9.73701	3.28348	0.399295	14.4612
5	33140001	33150000	12	0.00092035	0.000151637	6.06943	2.60156	0.387363	11.5479
5	33170001	33180000	11	0.000889049	0.000132026	6.73389	2.75144	0.609815	5.3362
5	39470001	39480000	26	0.00402344	0.000567449	7.0904	2.82587	0.416554	2.75643
5	39480001	39490000	31	0.00211201	0.00074194	2.8466	1.50924	0.441329	8.06402
5	40290001	40300000	31	0.00231436	0.000785048	2.94805	1.55976	0.431016	5.18653
5	40300001	40310000	23	0.00292644	0.000591553	4.94705	2.30657	0.433093	3.98822
5	41400001	41410000	34	0.00328253	0.0010055	3.26457	1.7069	0.462324	2.72234
5	46980001	46990000	16	0.00050854	0.000207848	2.44669	1.29083	0.566542	2.3374
5	47300001	47310000	11	0.000739032	0.000203289	3.63538	1.8621	0.409812	4.38567
5	47470001	47480000	13	0.00146195	0.000512429	2.85298	1.51247	0.397717	2.37341
5	49560001	49570000	53	0.00361003	0.00119061	3.03208	1.60031	0.397978	2.06963
5	49700001	49710000	111	0.00663976	0.00162063	4.09702	2.03458	0.614011	2.22405
5	55600001	55610000	21	0.00106874	0.000411774	2.59545	1.37599	0.425995	8.62637
5	56350001	56360000	11	0.000865081	0.000132026	6.55235	2.71201	0.50754	2.69083
5	56500001	56510000	10	0.000619652	0.000201965	3.06812	1.61735	0.4453	6.09596
5	56700001	56710000	13	0.000607942	0.000210467	2.88854	1.53034	0.582348	7.37519
5	56760001	56770000	12	0.000467725	0.000160134	2.92084	1.54638	0.55145	11.8809
5	56770001	56780000	14	0.000489663	0.000162752	3.00865	1.58911	0.573082	9.55607
5	56970001	56980000	28	0.00234359	0.000843226	2.77931	1.47473	0.396688	5.42659
5	58700001	58710000	25	0.00121284	0.000554272	2.18817	1.12972	0.464378	7.54541
5	58730001	58740000	13	0.000561688	0.000256863	2.18672	1.12877	0.496962	5.52414
5	59610001	59620000	10	0.000818132	0.000347059	2.35733	1.23715	0.720934	3.04236
5	60290001	60300000	42	0.00149021	0.000541677	2.7511	1.46001	0.677395	4.09928
5	60300001	60310000	39	0.00237472	0.000496774	4.78028	2.2571	0.549659	9.40763
5	60370001	60380000	14	0.00145484	0.00049552	2.93599	1.55385	0.490364	3.88047
5	64450001	64460000	23	0.00105461	0.000435957	2.41907	1.27445	0.408647	4.90889
5	64470001	64480000	16	0.00102295	0.000259493	3.94211	1.97897	0.400628	11.1044
5	64480001	64490000	20	0.000816111	0.000338569	2.41047	1.26932	0.480232	10.1459
5	64490001	64500000	15	0.00144929	0.000253595	5.71498	2.51475	0.456703	13.3182
5	64530001	64540000	13	0.000719662	0.000154248	4.66562	2.22207	0.549607	22.8139
5	64740001	64750000	11	0.000656452	0.000188239	3.48733	1.80212	0.430362	8.64225
5	64760001	64770000	12	0.000706524	0.000130722	5.40478	2.43424	0.587949	5.38285
5	66950001	66960000	46	0.00172977	0.000542484	3.18861	1.67293	0.748214	4.70836
5	66960001	66970000	31	0.00134618	0.000392165	3.43269	1.77934	0.708716	4.25912
5	66970001	66980000	35	0.00178378	0.000415704	4.29099	2.10131	0.618482	3.32503
5	68470001	68480000	20	0.0010186	0.000240528	4.23485	2.08231	0.382629	9.24218
5	68540001	68550000	23	0.00142184	0.000451683	3.14787	1.65438	0.420701	5.56778
5	68620001	68630000	12	0.00141203	0.000133333	10.5903	3.40466	0.477505	4.65355
5	72650001	72660000	10	0.000587694	0.000217652	2.70015	1.43304	0.398274	5.48694
5	80290001	80300000	11	0.000693399	0.000226144	3.06618	1.61644	0.463792	4.42525
5	80360001	80370000	10	0.00083777	0.000120915	6.92859	2.79256	0.487403	6.161
5	80370001	80380000	11	0.00150214	0.000122222	12.2903	3.61944	0.429449	3.59801
5	80460001	80470000	14	0.000815238	0.000184967	4.40748	2.13995	0.541563	6.78872
5	80470001	80480000	11	0.000551694	0.000122222	4.51387	2.17436	0.722589	6.73152
5	87880001	87890000	13	0.000791202	0.000298724	2.64861	1.40523	0.562084	2.45229
5	91010001	91020000	10	0.00131978	0.000198706	6.64187	2.73159	0.403781	6.20528
5	109270001	109280000	10	0.000607055	0.000188897	3.21368	1.68423	0.50186	2.74434
6	26100001	26110000	17	0.000999127	0.000412463	2.42234	1.2764	0.504995	6.39561
6	37060001	37070000	17	0.000921289	0.000302621	3.04437	1.60614	0.558693	5.31034
6	37530001	37540000	45	0.00231691	0.000809944	2.86058	1.51631	0.383713	2.83024
6	37600001	37610000	11	0.000671118	0.000250986	2.67393	1.41896	0.406539	9.22677
6	37630001	37640000	44	0.00211418	0.000841336	2.51288	1.32934	0.463404	5.97162
6	37640001	37650000	42	0.00189713	0.000857553	2.21226	1.14552	0.440597	5.27859
6	37970001	37980000	16	0.000813852	0.000220266	3.69486	1.88552	0.403934	13.7877
6	37980001	37990000	16	0.000713602	0.000264075	2.70227	1.43417	0.469173	13.6061
6	38000001	38010000	10	0.000511439	0.000139219	3.67363	1.87721	0.391705	11.4893
6	38020001	38030000	22	0.000929919	0.000337944	2.7517	1.46032	0.45962	9.39996
6	38030001	38040000	11	0.000383515	0.000164716	2.32834	1.2193	0.454544	8.24045
6	38050001	38060000	20	0.000723126	0.000291528	2.48047	1.31061	0.4137	6.25713
6	38850001	38860000	23	0.00131095	0.000485035	2.70279	1.43445	0.400151	4.06101
6	39500001	39510000	12	0.000767291	0.000280404	2.73638	1.45227	0.396545	5.96427
6	40930001	40940000	64	0.00310993	0.000830065	3.74661	1.90559	0.460576	2.06153
6	43070001	43080000	13	0.00167061	0.000400671	4.16953	2.05988	0.785323	3.17218
6	43080001	43090000	17	0.00197201	0.00059813	3.29696	1.72114	0.757774	2.57618
6	55430001	55440000	67	0.0034285	0.00124207	2.76031	1.46483	0.396872	3.50185
6	60780001	60790000	15	0.000538483	0.000213076	2.52719	1.33753	0.504139	7.50241
6	60880001	60890000	26	0.00122571	0.000412427	2.97194	1.57141	0.492443	2.39853
6	70690001	70700000	14	0.000617201	0.000198052	3.11636	1.63986	0.717268	11.5111
6	70730001	70740000	10	0.000376904	0.000115048	3.27606	1.71196	0.677731	13.3942
6	70750001	70760000	14	0.000816174	0.000160145	5.09647	2.3495	0.575064	13.1224
6	70760001	70770000	20	0.0010517	0.000246421	4.2679	2.09353	0.634193	11.0595
6	70780001	70790000	18	0.000802462	0.000248377	3.23082	1.6919	0.579985	8.38131
6	72390001	72400000	20	0.000866824	0.000335301	2.58521	1.37028	0.397468	6.31277
6	85480001	85490000	94	0.00418773	0.00140077	2.98959	1.57995	0.49776	2.13804
6	88820001	88830000	15	0.00106148	0.000374542	2.83407	1.50288	0.412523	10.199
6	104920001	104930000	17	0.000940802	0.000303268	3.10221	1.6333	0.399839	7.55897
6	104940001	104950000	13	0.000737433	0.000182357	4.0439	2.01575	0.549757	6.45585
6	105770001	105780000	23	0.0011105	0.000454288	2.44448	1.28953	0.38519	3.51128
6	113820001	113830000	24	0.00237535	0.000701337	3.38689	1.75996	0.401695	2.65032
6	113830001	113840000	13	0.00161719	0.000178446	9.06263	3.17993	0.470179	6.65241
6	113840001	113850000	27	0.0017475	0.00033859	5.16111	2.36768	0.496332	5.93057
7	6680001	6690000	10	0.000878098	0.000219613	3.99839	1.99942	0.502088	6.94818
7	6700001	6710000	15	0.00091977	0.000268644	3.42375	1.77558	0.418775	4.38059
7	6800001	6810000	34	0.00231856	0.000496131	4.67328	2.22444	0.439202	8.19784
7	6810001	6820000	27	0.0018935	0.000330113	5.73591	2.52002	0.559822	7.33474
7	6820001	6830000	10	0.000453808	0.000151647	2.99253	1.58137	0.672237	7.2161
7	6850001	6860000	17	0.00124116	0.000229436	5.40961	2.43553	0.483297	5.88889
7	6860001	6870000	11	0.00254024	0.000130722	19.4324	4.28039	0.453147	6.26111
7	7020001	7030000	22	0.00221614	0.000288895	7.67109	2.93943	0.460993	4.14587
7	7260001	7270000	29	0.00218198	0.000551682	3.95514	1.98373	0.395542	2.19012
7	7270001	7280000	20	0.00247129	0.000697578	3.54267	1.82484	0.388302	2.24328
7	9310001	9320000	10	0.0023982	0.000297398	8.06394	3.01149	0.648937	2.40855
7	9880001	9890000	50	0.0027143	0.0011003	2.46687	1.30268	0.47113	4.75076
7	10020001	10030000	12	0.00303982	0.000260806	11.6555	3.54294	0.402207	2.2399
7	10060001	10070000	19	0.00162158	0.000245114	6.61562	2.72588	0.433694	8.78255
7	10070001	10080000	12	0.00153616	0.000256215	5.99559	2.5839	0.414184	6.81257
7	10110001	10120000	61	0.00347738	0.00135886	2.55904	1.3556	0.461041	3.08335
7	10590001	10600000	12	0.0010949	0.000273225	4.00732	2.00264	0.586521	8.17664
7	10600001	10610000	19	0.00185528	0.000404593	4.58555	2.19709	0.479038	6.78822
7	10610001	10620000	18	0.000883466	0.000266019	3.32106	1.73165	0.49022	8.2784
7	10650001	10660000	12	0.000613315	0.000250986	2.44362	1.28902	0.458128	3.66708
7	13290001	13300000	20	0.00121762	0.000457571	2.66105	1.412	0.458179	4.55919
7	13310001	13320000	35	0.00275255	0.00057451	4.79113	2.26036	0.404787	2.23334
7	13390001	13400000	36	0.00271517	0.00082754	3.28101	1.71414	0.416112	12.7535
7	13420001	13430000	23	0.00313488	0.000428151	7.3219	2.87222	0.43928	9.26855
7	15330001	15340000	21	0.0016405	0.000497439	3.29789	1.72154	0.412545	2.31379
7	15340001	15350000	26	0.00120432	0.000522898	2.30316	1.20362	0.518256	3.21411
7	16520001	16530000	13	0.000728694	0.000289542	2.51671	1.33154	0.509658	4.16036
7	18230001	18240000	39	0.0018793	0.000544662	3.4504	1.78676	0.516897	2.31256
7	34000001	34010000	15	0.00515463	0.000313752	16.429	4.03817	0.455089	2.12768
7	48940001	48950000	85	0.00339813	0.00137846	2.46516	1.30168	0.552413	4.95054
7	63040001	63050000	20	0.00114631	0.000439898	2.60585	1.38176	0.479103	10.1292
7	63110001	63120000	14	0.0010697	0.000172556	6.19915	2.63207	0.426255	13.353
7	63120001	63130000	18	0.000573218	0.000208501	2.74923	1.45903	0.471883	11.1201
7	63130001	63140000	13	0.000636853	0.000149032	4.27326	2.09534	0.515219	8.1178
7	65120001	65130000	13	0.000741532	0.000270588	2.74045	1.45441	0.442848	2.0798
7	67350001	67360000	15	0.000571611	0.000227451	2.51312	1.32948	0.537906	4.41408
7	77670001	77680000	72	0.00529577	0.000928858	5.70138	2.51131	0.523522	4.95378
7	77690001	77700000	69	0.00415683	0.00123621	3.36256	1.74956	0.386047	4.74092
7	77790001	77800000	67	0.004156	0.0015011	2.76864	1.46918	0.385965	2.60857
7	81030001	81040000	10	0.000571893	0.000175821	3.2527	1.70164	0.458864	2.53892
7	104600001	104610000	14	0.00123848	0.000283007	4.37615	2.12966	0.466599	2.80113
8	33310001	33320000	48	0.00236183	0.00092961	2.54067	1.34521	0.387771	2.35159
8	33330001	33340000	48	0.00442263	0.00168724	2.62122	1.39024	0.386565	3.44379
8	38850001	38860000	13	0.000590836	0.000147725	3.99957	1.99984	0.501688	7.79015
8	38890001	38900000	26	0.00109532	0.00048503	2.25825	1.17521	0.384963	3.12135
8	38900001	38910000	19	0.00076928	0.000348404	2.20801	1.14275	0.469382	2.7114
8	39140001	39150000	14	0.00091768	0.000385008	2.38353	1.2531	0.464179	2.64255
8	39700001	39710000	16	0.000689133	0.000304603	2.2624	1.17785	0.409046	6.02639
8	39730001	39740000	11	0.00069426	0.000291522	2.3815	1.25187	0.434622	3.37241
8	43330001	43340000	10	0.00095449	0.000343145	2.78159	1.47591	0.457062	2.30968
8	44040001	44050000	10	0.000972921	0.000141189	6.89091	2.78469	0.433918	6.53363
8	44050001	44060000	14	0.000792765	0.000154252	5.13941	2.3616	0.475308	3.41538
8	44080001	44090000	19	0.00164292	0.000217006	7.57085	2.92046	0.566495	26.6698
8	44170001	44180000	23	0.00167036	0.00025165	6.63763	2.73067	0.387798	20.4084
8	44180001	44190000	26	0.00209236	0.000328105	6.3771	2.6729	0.520693	18.8631
8	44200001	44210000	10	0.000777409	0.000120915	6.42938	2.68468	0.449552	14.8208
8	44210001	44220000	10	0.000877658	0.000111111	7.89893	2.98166	0.549316	15.6703
8	44230001	44240000	17	0.000672506	0.000238567	2.81894	1.49515	0.444258	13.0873
8	44240001	44250000	16	0.00103038	0.000184971	5.57049	2.47781	0.47276	12.9467
8	44260001	44270000	31	0.00170572	0.000352949	4.83277	2.27285	0.394196	8.50875
8	44270001	44280000	12	0.00162485	0.000140526	11.5626	3.5314	0.403927	5.68773
8	44320001	44330000	12	0.0013502	0.000361446	3.73555	1.90132	0.553223	4.16298
8	58830001	58840000	11	0.000753701	0.000327472	2.30157	1.20262	0.584099	2.19557
8	63820001	63830000	24	0.000824328	0.000351032	2.3483	1.23162	0.394679	3.74234
8	63860001	63870000	14	0.000914444	0.000383677	2.38337	1.253	0.416002	2.63561
8	68550001	68560000	33	0.00151483	0.000609883	2.4838	1.31255	0.489145	7.4552
8	68570001	68580000	19	0.00116853	0.000383007	3.05094	1.60925	0.544792	5.66194
8	96430001	96440000	12	0.000874	0.000329419	2.65316	1.40771	0.386816	2.0764
8	100910001	100920000	13	0.000723024	0.000235958	3.06421	1.61551	0.461652	4.56378
8	100920001	100930000	15	0.000629384	0.000262762	2.39526	1.26018	0.491203	4.07
8	100960001	100970000	48	0.00237915	0.000918439	2.59043	1.37319	0.457814	4.45585
8	100970001	100980000	41	0.00201805	0.000671953	3.00326	1.58653	0.401018	3.76793
9	4870001	4880000	15	0.000856711	0.000166667	5.14026	2.36184	0.490147	3.4526
9	10470001	10480000	61	0.0027665	0.00108511	2.54951	1.35022	0.402721	2.42935
9	12280001	12290000	47	0.00277356	0.00102689	2.70093	1.43346	0.396319	3.42137
9	12480001	12490000	14	0.000894459	0.000164056	5.45216	2.44683	0.537778	7.2363
9	16250001	16260000	54	0.00302503	0.000990954	3.05264	1.61006	0.438671	3.22466
9	16260001	16270000	31	0.00142533	0.000529412	2.69229	1.42883	0.478103	2.06642
9	17560001	17570000	42	0.00286116	0.000868796	3.29325	1.71951	0.454188	3.58111
9	17570001	17580000	44	0.00217375	0.00068381	3.17888	1.66852	0.512111	3.13048
9	17590001	17600000	76	0.0044884	0.00190465	2.35655	1.23668	0.395088	3.10338
9	17600001	17610000	30	0.00223671	0.000747139	2.9937	1.58193	0.415304	2.65952
9	28840001	28850000	17	0.00214176	0.000438099	4.88876	2.28947	0.387952	6.4203
9	28860001	28870000	12	0.00114204	0.000193484	5.9025	2.56133	0.453395	7.09689
9	28870001	28880000	10	0.000824235	0.000160131	5.14725	2.3638	0.541075	9.01511
9	32120001	32130000	28	0.00176346	0.000403945	4.36559	2.12618	0.462283	3.52744
9	32130001	32140000	27	0.00165214	0.000345098	4.78745	2.25926	0.486358	2.11596
9	42420001	42430000	28	0.00160535	0.0006687	2.4007	1.26346	0.495724	3.18736
9	47070001	47080000	28	0.0015447	0.000395442	3.90626	1.96579	0.41188	3.86923
9	52240001	52250000	27	0.00145336	0.000584377	2.48702	1.31442	0.424532	2.28991
9	56800001	56810000	10	0.000536257	0.000139216	3.85198	1.9456	0.603797	4.95065
9	86080001	86090000	37	0.00276285	0.000934186	2.95749	1.56438	0.445793	5.05
10	22490001	22500000	32	0.00160834	0.000672593	2.39125	1.25777	0.430135	5.78857
10	45930001	45940000	39	0.00251747	0.000700714	3.59272	1.84508	0.400708	2.78544
10	58730001	58740000	27	0.00271143	0.000473213	5.72983	2.51849	0.488298	2.25626
10	70600001	70610000	19	0.00121367	0.000426816	2.84354	1.50769	0.423711	2.61551
10	71470001	71480000	20	0.00179788	0.000340545	5.27942	2.40038	0.49957	7.11035
10	71530001	71540000	14	0.00136051	0.000528781	2.57292	1.36341	0.394348	2.84382
10	71600001	71610000	11	0.000771233	0.000120918	6.37815	2.67314	0.582574	2.29877
10	72760001	72770000	30	0.00197477	0.000622369	3.17299	1.66584	0.417389	2.54545
10	77100001	77110000	19	0.0010061	0.000339245	2.9657	1.56837	0.385009	5.36658
10	77110001	77120000	19	0.000716662	0.000245119	2.92373	1.54781	0.46104	6.46425
10	77140001	77150000	11	0.000991279	0.000155562	6.37224	2.6718	0.503659	5.36289
10	77160001	77170000	11	0.000597334	0.000128113	4.66256	2.22112	0.648081	4.18849
10	87870001	87880000	25	0.00135808	0.000487613	2.78516	1.47776	0.404513	2.08597
10	98530001	98540000	36	0.00402864	0.000496732	8.11029	3.01975	0.513259	6.39296
10	98990001	99000000	16	0.000960118	0.000311111	3.08609	1.62578	0.43578	2.64277
11	8800001	8810000	35	0.00231681	0.000717693	3.22814	1.6907	0.423982	3.47122
11	14970001	14980000	13	0.00108693	0.000439243	2.47455	1.30717	0.518868	2.21377
11	14990001	15000000	21	0.0016113	0.00064457	2.49981	1.32182	0.586984	2.18243
11	15010001	15020000	10	0.00103766	0.000350342	2.96185	1.5665	0.560042	2.77179
11	27080001	27090000	27	0.00103753	0.000437918	2.36923	1.24442	0.421034	2.876
11	27680001	27690000	13	0.000716765	0.00023726	3.02101	1.59503	0.446914	4.97353
11	46670001	46680000	21	0.00100521	0.000432035	2.32669	1.21828	0.522908	4.40704
11	48870001	48880000	17	0.000931953	0.000347074	2.68517	1.42501	0.52683	6.23115
11	60690001	60700000	24	0.00233052	0.000425544	5.47657	2.45327	0.492344	5.85336
11	60700001	60710000	45	0.00327374	0.0011283	2.90148	1.53679	0.44857	3.7678
11	68310001	68320000	13	0.00110587	0.000386291	2.86279	1.51742	0.629825	2.89461
11	72050001	72060000	21	0.00152324	0.000485008	3.14065	1.65106	0.486547	6.40976
11	72090001	72100000	20	0.00100704	0.00039023	2.58063	1.36772	0.507594	6.56021
11	72100001	72110000	13	0.000670903	0.000284967	2.35432	1.23531	0.447838	5.70816
11	74270001	74280000	21	0.00107047	0.000335984	3.18607	1.67178	0.393876	6.59724
11	74280001	74290000	18	0.00151884	0.000327479	4.63798	2.2135	0.416824	5.47619
11	74290001	74300000	10	0.00069911	0.000191507	3.65057	1.86812	0.530304	7.10452
11	74300001	74310000	11	0.00058874	0.000192819	3.05333	1.61038	0.46262	7.49443
11	74330001	74340000	14	0.00180389	0.000279761	6.44797	2.68884	0.450108	3.45836
11	78640001	78650000	32	0.00148535	0.000482405	3.07905	1.62249	0.493202	4.06894
11	78730001	78740000	13	0.000842027	0.000144444	5.82944	2.54336	0.514886	2.47011
11	90770001	90780000	35	0.0015473	0.000627505	2.4658	1.30205	0.416753	2.33756
11	90780001	90790000	65	0.00426597	0.000866106	4.92546	2.30026	0.462588	2.20098
11	94540001	94550000	16	0.00100536	0.000396741	2.53405	1.34144	0.505872	5.45331
11	96260001	96270000	15	0.000653457	0.000242484	2.69485	1.4302	0.527498	3.75015
11	96270001	96280000	14	0.000853002	0.000224846	3.79372	1.92361	0.495761	2.61233
11	96280001	96290000	14	0.000895861	0.000242484	3.69452	1.88539	0.576526	4.74244
11	96290001	96300000	12	0.000555876	0.000161438	3.44328	1.78378	0.448667	3.97044
11	96300001	96310000	18	0.00098709	0.000286928	3.4402	1.78249	0.610505	3.71407
11	96910001	96920000	12	0.000897296	0.000228763	3.92238	1.97173	0.48963	9.44053
11	96950001	96960000	16	0.000550311	0.000241186	2.28169	1.1901	0.391478	8.54442
12	20140001	20150000	13	0.00359258	0.000309811	11.596	3.53556	0.591678	3.04912
12	31140001	31150000	17	0.00116464	0.000343166	3.39381	1.76291	0.483977	2.20754
12	33850001	33860000	45	0.00351349	0.000653651	5.37518	2.42631	0.406815	6.50373
12	33880001	33890000	26	0.00197456	0.00035231	5.60461	2.48661	0.444841	5.08431
12	33890001	33900000	25	0.00251231	0.000352364	7.12987	2.83388	0.419565	5.46954
12	33900001	33910000	31	0.00097327	0.000415077	2.34479	1.22946	0.729463	5.08066
12	33910001	33920000	17	0.000855355	0.00026079	3.27986	1.71363	0.523596	4.07566
12	33920001	33930000	23	0.00155992	0.000370596	4.20922	2.07355	0.566213	3.41637
12	33930001	33940000	13	0.00144239	0.000161445	8.93425	3.15935	0.503139	2.21785
12	37940001	37950000	21	0.00170487	0.000413099	4.12703	2.0451	0.501319	2.70403
12	48040001	48050000	29	0.00155125	0.000564077	2.75007	1.45947	0.439903	2.25897
12	48170001	48180000	13	0.000770985	0.000262751	2.93428	1.55301	0.456045	2.06177
12	50190001	50200000	13	0.00075066	0.000204584	3.6692	1.87547	0.501703	5.14371
12	50210001	50220000	10	0.000756918	0.000251639	3.00795	1.58878	0.432703	2.81766
12	50650001	50660000	10	0.000478304	0.000194122	2.46394	1.30096	0.448736	4.33504
12	50780001	50790000	14	0.00076153	0.000256879	2.96455	1.56781	0.382847	6.55343
12	51140001	51150000	11	0.000736743	0.000132026	5.58029	2.48034	0.456548	10.94
12	51150001	51160000	10	0.000713589	0.00011961	5.96596	2.57676	0.425597	9.4498
12	51170001	51180000	26	0.00183339	0.000318301	5.75993	2.52605	0.398279	9.90677
12	51180001	51190000	12	0.000802787	0.00015752	5.09641	2.34948	0.416166	10.7424
12	51300001	51310000	18	0.00151536	0.000322222	4.70284	2.23353	0.457886	7.39522
12	51310001	51320000	11	0.00116284	0.000118308	9.82892	3.29703	0.582034	8.12338
12	51350001	51360000	12	0.000795271	0.000238567	3.33353	1.73705	0.495021	5.50687
12	59020001	59030000	34	0.00180421	0.000575201	3.13666	1.64923	0.500332	3.31759
12	59800001	59810000	52	0.00341046	0.0013499	2.52645	1.33711	0.453574	2.23631
12	59810001	59820000	22	0.00242073	0.000610543	3.96488	1.98728	0.716077	2.76254
13	6710001	6720000	19	0.00116571	0.000454922	2.56244	1.35752	0.42972	2.90836
13	22190001	22200000	18	0.000985403	0.000328146	3.00294	1.58638	0.390971	15.3755
13	22490001	22500000	21	0.00114379	0.00041377	2.76431	1.46692	0.399856	4.15488
13	44250001	44260000	11	0.00148309	0.00046734	3.17347	1.66606	0.501143	2.62474
13	50490001	50500000	22	0.00277036	0.00050915	5.44115	2.44391	0.47176	4.38048
13	52460001	52470000	21	0.00124346	0.000502667	2.47373	1.30669	0.519412	4.72103
13	55470001	55480000	31	0.00191241	0.000732759	2.60988	1.38398	0.46919	2.19486
13	58210001	58220000	15	0.000790325	0.000293482	2.69292	1.42917	0.407829	3.37576
13	58310001	58320000	50	0.00265935	0.000820986	3.23921	1.69564	0.451186	2.28549
13	58370001	58380000	11	0.0013667	0.000268633	5.08761	2.34699	0.388232	6.60233
13	58380001	58390000	29	0.00140008	0.000494793	2.82963	1.50061	0.46692	5.99835
13	58390001	58400000	34	0.00183644	0.000579764	3.16756	1.66337	0.441857	4.59517
13	63240001	63250000	12	0.000702265	0.000222899	3.1506	1.65563	0.517641	2.19318
13	78360001	78370000	18	0.00105302	0.000359545	2.92876	1.55029	0.455052	5.13731
14	2730001	2740000	93	0.00586588	0.00151545	3.87072	1.9526	0.384782	3.05118
14	2750001	2760000	93	0.00516105	0.00164864	3.13049	1.64639	0.395885	2.40336
14	2760001	2770000	72	0.00397166	0.00127752	3.10888	1.6364	0.529573	3.43553
14	5110001	5120000	13	0.00113812	0.000432708	2.63023	1.39519	0.639998	2.42111
14	16120001	16130000	43	0.00218511	0.000522898	4.17885	2.0631	0.50438	10.61
14	16130001	16140000	26	0.00138427	0.000287582	4.81348	2.26708	0.560302	9.05178
14	16140001	16150000	10	0.00123836	0.000149023	8.30986	3.05482	0.547675	7.92032
14	16190001	16200000	13	0.000999931	0.000301314	3.31857	1.73056	0.54655	5.826
14	16200001	16210000	30	0.00118332	0.000480392	2.46324	1.30056	0.501412	4.31037
14	16220001	16230000	10	0.000736251	0.000277778	2.6505	1.40627	0.410021	2.54957
14	23030001	23040000	11	0.00100468	0.000295425	3.4008	1.76587	0.628647	2.08711
14	33580001	33590000	31	0.00178651	0.000620942	2.8771	1.52461	0.478898	2.3448
14	49580001	49590000	19	0.000890509	0.000339266	2.62481	1.39221	0.453141	6.17844
14	50690001	50700000	19	0.000901577	0.000283013	3.18564	1.67158	0.426333	5.61576
14	50710001	50720000	15	0.000565278	0.000250991	2.25218	1.17132	0.506785	7.18568
14	50730001	50740000	15	0.000788574	0.000220266	3.5801	1.84	0.507953	3.86106
14	50740001	50750000	17	0.000655407	0.000188889	3.4698	1.79485	0.437023	2.68093
14	50770001	50780000	19	0.000855797	0.000247718	3.45472	1.78857	0.428413	3.55493
14	50790001	50800000	17	0.000660627	0.000285639	2.3128	1.20964	0.531813	3.3588
14	50800001	50810000	24	0.000825343	0.000362753	2.27522	1.18601	0.47457	5.78769
14	50810001	50820000	19	0.000914669	0.000268627	3.40498	1.76765	0.533442	6.08806
14	50860001	50870000	16	0.000677468	0.000290209	2.33441	1.22306	0.552756	4.22402
14	50870001	50880000	18	0.000704324	0.000286934	2.45466	1.29552	0.572701	4.7527
14	50930001	50940000	11	0.000377943	0.000167324	2.25875	1.17552	0.546527	4.43852
14	51840001	51850000	10	0.000913765	0.000118306	7.72374	2.9493	0.497486	3.56746
14	51850001	51860000	18	0.0008703	0.00029281	2.97223	1.57155	0.566686	2.14449
14	53040001	53050000	23	0.00120704	0.000376503	3.20592	1.68074	0.391856	2.92787
14	57860001	57870000	27	0.00151815	0.000518312	2.92903	1.55042	0.493873	3.47462
14	59100001	59110000	12	0.000439846	0.00019281	2.28124	1.18982	0.446211	3.69169
14	62290001	62300000	18	0.000887166	0.000404593	2.19274	1.13273	0.444921	4.13921
14	66880001	66890000	14	0.00128474	0.000471906	2.72245	1.44491	0.392958	2.83235
14	67020001	67030000	16	0.000906107	0.000400671	2.26147	1.17726	0.431391	3.51897
14	69260001	69270000	26	0.000971063	0.000318301	3.05077	1.60917	0.407949	5.69886
14	71080001	71090000	57	0.00263346	0.000836619	3.14774	1.65432	0.488338	3.63482
14	80840001	80850000	19	0.000710248	0.000323571	2.19503	1.13424	0.512227	2.46891
14	80880001	80890000	16	0.00100379	0.000366036	2.74233	1.4554	0.426365	2.36412
15	6350001	6360000	17	0.000868987	0.00034053	2.55187	1.35155	0.387894	2.15878
15	6360001	6370000	11	0.000536156	0.000181703	2.95073	1.56107	0.594997	3.37092
15	31930001	31940000	11	0.000551715	0.000171899	3.20953	1.68236	0.383442	8.66687
15	54560001	54570000	10	0.000934779	0.00015752	5.93435	2.56909	0.412849	4.09715
15	63890001	63900000	25	0.00170424	0.000598743	2.84636	1.50912	0.467673	2.48135
15	68020001	68030000	12	0.000913782	0.000252962	3.61233	1.85293	0.423569	4.35126
15	68200001	68210000	25	0.00138929	0.00053268	2.60811	1.38301	0.505396	3.65623
15	68230001	68240000	22	0.00142633	0.000299346	4.76482	2.25242	0.41637	3.74845
15	68240001	68250000	22	0.00102248	0.00044382	2.30382	1.20403	0.468535	2.94983
15	68590001	68600000	80	0.00367609	0.00149338	2.46159	1.29959	0.421702	2.82
15	68620001	68630000	27	0.000997269	0.000343196	2.90583	1.53895	0.601583	3.95996
15	69810001	69820000	84	0.00400527	0.00182994	2.18874	1.1301	0.469114	4.36739
15	69840001	69850000	32	0.00754881	0.00123545	6.11017	2.61121	0.442115	2.44374
16	4050001	4060000	36	0.0021392	0.000678637	3.1522	1.65636	0.404955	2.97591
16	22790001	22800000	44	0.00287571	0.00115528	2.48919	1.31568	0.383676	3.53316
16	31910001	31920000	11	0.000738225	0.000235304	3.13732	1.64953	0.599299	6.74736
16	31930001	31940000	23	0.000982606	0.000443791	2.21412	1.14673	0.572312	6.98998
16	31940001	31950000	21	0.00112442	0.000418363	2.68767	1.42635	0.574868	9.0827
16	31960001	31970000	13	0.0010679	0.000181727	5.8764	2.55493	0.554721	13.0743
16	31990001	32000000	10	0.000857903	0.000158824	5.4016	2.43339	0.498615	6.98121
16	32050001	32060000	89	0.00348174	0.00150909	2.30718	1.20613	0.464431	2.59057
16	49970001	49980000	13	0.000571725	0.000260136	2.19779	1.13606	0.390065	3.09751
16	54470001	54480000	10	0.000519178	0.000193464	2.68359	1.42416	0.683147	6.05779
16	65970001	65980000	43	0.00325579	0.00133555	2.43779	1.28557	0.389097	5.44253
16	66010001	66020000	13	0.000894716	0.000408506	2.19022	1.13107	0.512782	3.58192
16	66020001	66030000	19	0.000886764	0.000318961	2.78016	1.47517	0.621187	2.70255
16	69830001	69840000	19	0.000984751	0.000354279	2.77959	1.47487	0.399196	4.59873
16	69850001	69860000	11	0.000764583	0.00024903	3.07024	1.61835	0.429727	3.30863
16	69860001	69870000	12	0.000837793	0.000256244	3.26951	1.70908	0.468663	2.6278
16	69880001	69890000	17	0.00109168	0.000360146	3.03122	1.5999	0.411433	3.44254
16	70150001	70160000	19	0.0010564	0.000260817	4.05035	2.01805	0.413835	3.19244
16	70170001	70180000	17	0.00123499	0.000301974	4.08972	2.032	0.414636	2.37819
17	2850001	2860000	15	0.000708316	0.000199355	3.55304	1.82905	0.566854	5.44927
17	2860001	2870000	16	0.000782644	0.000339251	2.30698	1.206	0.451726	7.16635
17	2870001	2880000	14	0.00061411	0.000265365	2.31421	1.21052	0.480824	6.89937
17	2880001	2890000	15	0.000812241	0.000233992	3.47123	1.79545	0.462884	6.21739
17	2900001	2910000	10	0.00067382	0.00016732	4.02713	2.00975	0.399265	4.4217
17	2910001	2920000	18	0.000725483	0.000271912	2.66808	1.4158	0.515706	2.80844
17	18110001	18120000	13	0.00112006	0.000260162	4.30524	2.10609	0.391354	6.88222
17	18180001	18190000	13	0.000553785	0.000162749	3.40269	1.76668	0.715277	9.86055
17	18230001	18240000	26	0.0016874	0.000424192	3.97792	1.99201	0.40455	6.90474
17	21870001	21880000	39	0.00357319	0.000586928	6.08795	2.60596	0.586614	3.58241
17	21880001	21890000	45	0.00217139	0.000553619	3.92217	1.97165	0.575867	2.05124
17	52440001	52450000	18	0.000939149	0.000273874	3.42913	1.77784	0.414535	3.80045
17	52470001	52480000	13	0.000979022	0.000168634	5.8056	2.53745	0.386753	5.23829
17	52480001	52490000	21	0.00121212	0.000349688	3.46629	1.79339	0.408473	4.62451
17	52500001	52510000	15	0.000821719	0.000279745	2.93739	1.55453	0.464901	3.13535
17	55880001	55890000	53	0.00224732	0.000961604	2.33705	1.22469	0.47302	3.77801
17	56660001	56670000	12	0.00133919	0.000133333	10.044	3.32825	0.515784	3.6779
17	56730001	56740000	14	0.00432146	0.000203272	21.2595	4.41004	0.406888	2.44271
17	56800001	56810000	80	0.0101643	0.0016854	6.03079	2.59235	0.419095	3.06992
17	56810001	56820000	109	0.00545965	0.0015598	3.50022	1.80745	0.506411	2.1039
17	56820001	56830000	69	0.00418622	0.00125729	3.32956	1.73533	0.574092	2.47433
17	57750001	57760000	18	0.00130971	0.000347727	3.76649	1.91322	0.503249	2.61927
17	66680001	66690000	24	0.00211564	0.00040068	5.28012	2.40057	0.442695	2.40211
17	66820001	66830000	69	0.0023239	0.000883233	2.63113	1.39568	0.413612	6.22015
17	66830001	66840000	46	0.00284554	0.000693494	4.10319	2.03675	0.441263	5.37704
18	26890001	26900000	49	0.00240511	0.000973266	2.47117	1.3052	0.450393	4.48772
18	49070001	49080000	11	0.000749314	0.00020915	3.58266	1.84103	0.537567	4.07171
18	57020001	57030000	12	0.00073498	0.000157527	4.66574	2.22211	0.459191	12.593
19	27360001	27370000	12	0.000479353	0.000132029	3.63066	1.86023	0.552091	3.99964
19	27370001	27380000	16	0.000684863	0.000228777	2.99358	1.58187	0.531864	2.17292
19	43630001	43640000	10	0.000627306	0.000197386	3.17807	1.66815	0.610296	5.84299
20	6460001	6470000	11	0.0013166	0.000210458	6.25588	2.64521	0.419913	2.27695
20	8840001	8850000	19	0.000802019	0.000366021	2.19118	1.13171	0.424982	3.38195
20	11290001	11300000	44	0.00292129	0.000551693	5.29514	2.40467	0.507817	2.06819
20	11520001	11530000	10	0.00274512	0.000259483	10.5792	3.40316	0.425719	3.60067
20	13170001	13180000	36	0.00179031	0.000593515	3.01645	1.59285	0.457755	3.47445
20	13180001	13190000	67	0.00295675	0.00127465	2.31966	1.21391	0.394119	2.1706
20	13720001	13730000	27	0.00130973	0.000511808	2.55903	1.35559	0.465344	2.57087
20	13740001	13750000	26	0.00126618	0.000503322	2.51565	1.33093	0.48598	2.04994
20	13750001	13760000	46	0.00183593	0.000809994	2.2666	1.18053	0.525176	2.14929
20	14420001	14430000	20	0.00144967	0.000510458	2.83994	1.50586	0.422938	4.75525
20	14590001	14600000	30	0.00107728	0.000492842	2.18585	1.1282	0.5364	3.0391
20	25040001	25050000	19	0.00139034	0.000330072	4.21223	2.07459	0.423368	2.73726
20	30690001	30700000	16	0.00127279	0.000412454	3.0859	1.62569	0.453321	3.31907
20	33060001	33070000	36	0.0019303	0.000656919	2.93841	1.55504	0.463648	8.982
20	33080001	33090000	11	0.000743384	0.000203926	3.64536	1.86606	0.545445	17.0431
20	33090001	33100000	12	0.000537666	0.000214402	2.50775	1.32639	0.542224	16.518
20	33100001	33110000	20	0.00102257	0.000389551	2.625	1.39232	0.534801	14.5504
20	33140001	33150000	10	0.00123979	0.000140523	8.82268	3.14122	0.426295	11.6118
20	39740001	39750000	26	0.00192092	0.000444526	4.32128	2.11146	0.412443	2.99737
20	50670001	50680000	12	0.000768213	0.000347747	2.20911	1.14347	0.39544	5.32478
20	53620001	53630000	16	0.000875715	0.000311111	2.8148	1.49303	0.412936	6.66445
20	53630001	53640000	19	0.00107503	0.000353602	3.04023	1.60418	0.403819	5.92285
20	55670001	55680000	77	0.00416105	0.00188284	2.20999	1.14404	0.472001	4.70812
20	55680001	55690000	66	0.00454893	0.00168389	2.70144	1.43373	0.410135	5.02884
21	5190001	5200000	63	0.00284032	0.00115955	2.4495	1.29249	0.499483	2.68564
21	9240001	9250000	38	0.00159329	0.00072759	2.18982	1.13081	0.543181	3.91061
21	9250001	9260000	11	0.000565527	0.000235309	2.40334	1.26504	0.399419	2.54715
21	33570001	33580000	15	0.000812241	0.00032419	2.50545	1.32507	0.394547	3.09563
21	37850001	37860000	16	0.00106917	0.000264729	4.03873	2.0139	0.393812	3.38897
21	37870001	37880000	28	0.00157788	0.000364729	4.32617	2.11309	0.461402	4.00318
21	37880001	37890000	68	0.00389538	0.000929603	4.19037	2.06708	0.447544	2.95626
21	37890001	37900000	14	0.00113353	0.000261444	4.33565	2.11625	0.470695	3.21142
21	37900001	37910000	18	0.00151199	0.000267996	5.64184	2.49617	0.452348	3.05594
21	44900001	44910000	13	0.000644147	0.000258854	2.48846	1.31525	0.543632	3.96823
21	47040001	47050000	14	0.00111856	0.000303288	3.68811	1.88288	0.408339	4.29346
21	47080001	47090000	39	0.00214732	0.000590888	3.63406	1.86158	0.444476	2.91985
22	7990001	8000000	47	0.0037203	0.00116021	3.20657	1.68103	0.462793	2.83491
22	8000001	8010000	43	0.00196921	0.000510502	3.8574	1.94763	0.660107	4.94524
22	8020001	8030000	50	0.00166951	0.000601987	2.77333	1.47162	0.756432	3.57037
22	13090001	13100000	20	0.00126282	0.000434015	2.90962	1.54083	0.3901	2.20174
22	26230001	26240000	12	0.000724172	0.000172549	4.19691	2.06933	0.425978	3.75754
22	27950001	27960000	16	0.000776902	0.000342498	2.26834	1.18164	0.456177	4.33562
22	28090001	28100000	12	0.000985825	0.000152941	6.44579	2.68836	0.557506	9.65387
22	28110001	28120000	14	0.00113293	0.000220925	5.12812	2.35843	0.442559	4.79924
22	28750001	28760000	18	0.000941731	0.000348366	2.70328	1.43471	0.522404	14.9524
22	28840001	28850000	24	0.00117634	0.000509161	2.31035	1.20811	0.451529	16.7649
22	28870001	28880000	23	0.00125423	0.00046016	2.72564	1.44659	0.395036	14.8166
22	28880001	28890000	13	0.000702336	0.000283025	2.48153	1.31123	0.422666	14.7916
22	28890001	28900000	16	0.00101619	0.000401316	2.53214	1.34036	0.508429	13.59
22	28920001	28930000	16	0.00117695	0.000494828	2.3785	1.25005	0.465756	12.1907
22	29170001	29180000	12	0.000664808	0.00029611	2.24514	1.1668	0.511831	6.46098
22	31490001	31500000	11	0.00054764	0.000203922	2.68554	1.42521	0.438112	4.35293
22	31520001	31530000	11	0.000489556	0.000181046	2.70404	1.43512	0.469831	5.02874
22	31550001	31560000	16	0.00101238	0.000333341	3.03707	1.60268	0.434484	3.54709
22	31750001	31760000	10	0.000700762	0.00020654	3.39286	1.7625	0.409359	5.77094
22	48710001	48720000	15	0.000980429	0.000430136	2.27935	1.18862	0.392669	5.16769
22	51630001	51640000	24	0.00108018	0.000462765	2.33419	1.22292	0.498204	4.74773
22	51640001	51650000	32	0.00156385	0.000568677	2.74998	1.45942	0.500029	4.03387
22	51650001	51660000	24	0.00139527	0.000337942	4.12873	2.0457	0.403649	3.22847
22	51690001	51700000	16	0.00176793	0.000271901	6.50211	2.70091	0.539126	3.362
22	51710001	51720000	19	0.00170011	0.000220915	7.69577	2.94406	0.481295	11.3343
22	51720001	51730000	25	0.00116361	0.000322876	3.60389	1.84956	0.574767	9.21072
22	51730001	51740000	25	0.00151709	0.00028498	5.3235	2.41237	0.469475	7.50993
22	51750001	51760000	27	0.00100655	0.0004151	2.42484	1.27789	0.526632	5.21233
22	58930001	58940000	68	0.00302574	0.00137102	2.20693	1.14204	0.396835	3.13967
22	58960001	58970000	42	0.00292323	0.000855801	3.41578	1.77222	0.400148	2.70945
23	4790001	4800000	50	0.0031598	0.000952449	3.31755	1.73012	0.383312	3.94563
23	4800001	4810000	31	0.00140985	0.000479126	2.94255	1.55706	0.473863	2.2607
23	8200001	8210000	13	0.00108996	0.000289561	3.76418	1.91234	0.449765	3.09262
23	8580001	8590000	15	0.00190586	0.000236606	8.05499	3.00988	0.487748	2.09578
23	8720001	8730000	16	0.000753926	0.000310458	2.42843	1.28002	0.519901	4.5852
23	8750001	8760000	30	0.00120028	0.000509172	2.35732	1.23715	0.432625	3.02252
23	8760001	8770000	12	0.000567279	0.000214384	2.64609	1.40386	0.723176	13.9582
23	8770001	8780000	15	0.000614994	0.000186275	3.30154	1.72314	0.576464	18.5982
23	8780001	8790000	22	0.000949672	0.00024184	3.92686	1.97338	0.543283	16.2061
23	8790001	8800000	11	0.000420926	0.000120918	3.48109	1.79954	0.623422	14.0454
23	8820001	8830000	13	0.000800903	0.000195425	4.09826	2.03501	0.638848	7.29791
23	34710001	34720000	32	0.00164427	0.000581886	2.82576	1.49864	0.466248	2.27635
23	38450001	38460000	34	0.003482	0.000652288	5.33813	2.41634	0.60162	3.63304
23	38460001	38470000	95	0.00430247	0.00119417	3.6029	1.84916	0.540636	4.07155
23	42380001	42390000	24	0.0019618	0.000507929	3.86235	1.94948	0.407988	3.42146
23	44670001	44680000	25	0.00184108	0.000345767	5.32463	2.41268	0.45934	3.67723
23	44680001	44690000	18	0.00140054	0.000267997	5.22595	2.38569	0.540022	2.36398
24	4130001	4140000	12	0.000984388	0.000314399	3.13102	1.64663	0.389954	3.10492
24	45220001	45230000	33	0.00136954	0.00057594	2.37792	1.2497	0.533269	2.22853
25	3790001	3800000	20	0.000957768	0.000403982	2.37082	1.24539	0.419864	5.23553
25	9600001	9610000	14	0.000655236	0.00026341	2.48751	1.3147	0.585505	3.49894
25	12990001	13000000	22	0.000778187	0.000332694	2.33905	1.22592	0.385027	2.48328
25	30310001	30320000	16	0.000683772	0.000289549	2.36151	1.23971	0.492455	7.06948
25	30320001	30330000	12	0.00084542	0.000154909	5.45753	2.44825	0.439001	6.5736
25	30330001	30340000	10	0.00103982	0.000169295	6.14206	2.61872	0.414156	4.52625
25	36830001	36840000	10	0.000927148	0.000168627	5.49822	2.45896	0.597901	2.21259
25	37150001	37160000	16	0.00108343	0.000239216	4.52909	2.17922	0.601015	2.04913
26	12950001	12960000	15	0.00105594	0.000307196	3.43735	1.7813	0.60207	4.36057
26	12990001	13000000	23	0.000837152	0.000303275	2.76037	1.46486	0.527361	2.90631
26	13000001	13010000	11	0.00107397	0.000210462	5.10292	2.35132	0.421805	2.64073
26	13010001	13020000	15	0.000582722	0.000242489	2.40309	1.26489	0.510364	2.14628
26	30550001	30560000	23	0.00100902	0.000347074	2.90722	1.53964	0.510111	3.42724
26	33590001	33600000	16	0.000967159	0.000213081	4.53893	2.18235	0.632289	3.25602
27	11850001	11860000	26	0.00121265	0.000458219	2.64644	1.40405	0.44647	3.18593
27	12690001	12700000	15	0.000858434	0.000392869	2.18504	1.12766	0.412403	2.55968
27	37340001	37350000	14	0.000883649	0.000345105	2.56052	1.35644	0.393728	2.60261
28	7740001	7750000	13	0.000708177	0.000285644	2.47923	1.30989	0.395131	3.07347
28	19680001	19690000	68	0.00317919	0.00145055	2.19171	1.13206	0.459841	8.25153
28	19700001	19710000	37	0.00195145	0.000817751	2.38636	1.25481	0.410587	5.20118
28	19710001	19720000	17	0.00193587	0.00033923	5.70666	2.51265	0.488819	4.08397
28	20800001	20810000	52	0.00256827	0.00114665	2.2398	1.16337	0.412755	7.64631
28	20830001	20840000	20	0.00111123	0.000417026	2.66465	1.41395	0.387193	4.08997
28	20840001	20850000	18	0.00113416	0.000246426	4.60244	2.2024	0.530801	4.95338
29	13230001	13240000	52	0.00533243	0.00119373	4.46703	2.15932	0.63381	3.3126
29	15570001	15580000	32	0.00451605	0.000883794	5.10984	2.35328	0.397635	3.31397
29	27070001	27080000	60	0.00297326	0.00118188	2.5157	1.33096	0.403003	2.05435
29	39620001	39630000	10	0.000819602	0.000358276	2.28763	1.19385	0.424512	15.8708

## Sheet: S6-3
Table S6-3 Summary of the positive selective sweep regions identified in Tibetan Cashmere goats
Chr	Starting position	Ending position	SNP number	BI Pi	TC Pi	θπ ratio	log2(θπ ratio)	Weir_Fst	iHH12
1	610001	620000	58	0.00616665	0.00050346	12.2485	3.61454	0.456314	3.74216
1	23840001	23850000	21	0.00124036	0.000356408	3.48017	1.79916	0.380294	2.36846
1	25060001	25070000	10	0.000770042	0.000197884	3.89138	1.96028	0.35868	3.62748
1	28290001	28300000	38	0.00208339	0.000670162	3.10879	1.63635	0.481335	2.13761
1	50290001	50300000	27	0.000923005	0.00050243	1.83708	0.877416	0.348348	4.75646
1	52760001	52770000	23	0.000793068	0.000396356	2.0009	1.00065	0.424354	4.10018
1	52770001	52780000	33	0.000977113	0.000514092	1.90066	0.926499	0.474108	3.75898
1	52780001	52790000	32	0.000958375	0.000519099	1.84623	0.884581	0.525591	3.52156
1	53190001	53200000	68	0.00285104	0.0014149	2.01501	1.01079	0.414395	2.5677
1	58930001	58940000	20	0.000963585	0.000429636	2.24279	1.1653	0.417887	2.90379
1	58940001	58950000	23	0.0014664	0.000410368	3.57338	1.83729	0.379938	4.29075
1	58950001	58960000	17	0.000828928	0.000267729	3.09615	1.63047	0.577693	5.83026
1	70330001	70340000	51	0.00226833	0.000793795	2.85758	1.51479	0.410794	3.41197
1	70640001	70650000	28	0.00138842	0.000758423	1.83067	0.872369	0.359594	2.39523
1	71590001	71600000	74	0.00356988	0.00132341	2.69749	1.43162	0.342848	3.88588
1	74020001	74030000	17	0.000614004	0.000292332	2.10037	1.07064	0.332696	4.14829
1	74050001	74060000	20	0.000901586	0.000330217	2.73028	1.44905	0.33231	3.13052
1	74080001	74090000	20	0.0014571	0.000281229	5.18119	2.37328	0.580079	3.49156
1	83180001	83190000	24	0.00113699	0.000514043	2.21186	1.14526	0.343711	11.3814
1	108970001	108980000	10	0.000437558	0.00014154	3.09141	1.62826	0.336836	4.85524
1	109030001	109040000	13	0.000789569	0.000256893	3.07353	1.6199	0.535383	2.21482
1	113410001	113420000	56	0.00248627	0.00130844	1.90018	0.926135	0.375038	3.25887
1	114530001	114540000	54	0.00182094	0.000641983	2.83643	1.50408	0.438323	13.2468
1	114540001	114550000	33	0.00176436	0.000423363	4.16749	2.05918	0.532598	16.2921
1	114550001	114560000	11	0.00058015	9.73571e-05	5.95899	2.57507	0.561627	15.5333
1	114570001	114580000	10	0.00082024	0.000145503	5.63727	2.495	0.554158	13.3275
1	114580001	114590000	10	0.000743151	9.57685e-05	7.75987	2.95603	0.547096	10.5218
1	114590001	114600000	23	0.000852065	0.000272513	3.12669	1.64464	0.470263	7.16313
1	114600001	114610000	24	0.000899004	0.000355301	2.53026	1.33929	0.429683	4.03552
1	114610001	114620000	33	0.00163704	0.000848472	1.9294	0.948151	0.344315	2.84384
1	117240001	117250000	16	0.0011313	0.000385476	2.93481	1.55327	0.434341	6.09178
1	119690001	119700000	18	0.000635075	0.000281221	2.25828	1.17522	0.687422	2.11922
1	121570001	121580000	16	0.000915581	0.00021112	4.33678	2.11662	0.476853	8.65799
1	121580001	121590000	30	0.00201109	0.000382021	5.26434	2.39625	0.35257	6.62275
1	121590001	121600000	11	0.00135357	0.000135983	9.95396	3.31527	0.473966	3.80773
1	132660001	132670000	21	0.00111189	0.000583959	1.90405	0.929075	0.377346	3.06002
1	135520001	135530000	32	0.00139223	0.00072675	1.91569	0.937866	0.393936	2.12448
1	135540001	135550000	27	0.00163134	0.000683352	2.38726	1.25536	0.624519	2.27702
1	135550001	135560000	17	0.00167513	0.000452129	3.70498	1.88947	0.477476	2.731
1	155280001	155290000	28	0.00193724	0.000297904	6.5029	2.70108	0.525713	6.55
1	155310001	155320000	17	0.000505013	0.000270113	1.86964	0.902757	0.355998	4.22237
1	155950001	155960000	44	0.0021894	0.00106149	2.06257	1.04444	0.359648	5.00199
1	155970001	155980000	53	0.00283437	0.00105387	2.68949	1.42733	0.365361	2.20529
2	2440001	2450000	63	0.00259151	0.00124061	2.0889	1.06274	0.446302	10.3379
2	2450001	2460000	24	0.00182372	0.00046535	3.91903	1.9705	0.426532	10.4173
2	2460001	2470000	23	0.00111717	0.000469577	2.3791	1.25042	0.42567	13.1049
2	2470001	2480000	12	0.00117397	0.000205032	5.72579	2.51747	0.401092	17.3391
2	2480001	2490000	14	0.00112122	0.000204497	5.48282	2.45492	0.405771	21.5258
2	2490001	2500000	14	0.00136238	0.000151854	8.97164	3.16537	0.363512	20.7015
2	2500001	2510000	19	0.00109811	0.000253175	4.33736	2.11682	0.37815	17.9509
2	2510001	2520000	11	0.000711313	0.000212963	3.34008	1.73988	0.574431	15.8564
2	2520001	2530000	13	0.000893405	0.000289418	3.0869	1.62616	0.376527	13.4373
2	2540001	2550000	11	0.000891447	0.000194979	4.57202	2.19283	0.526769	10.1363
2	2550001	2560000	11	0.000629309	0.000212446	2.96221	1.56667	0.403061	12.2097
2	2560001	2570000	12	0.000846149	0.000170635	4.95882	2.31	0.435805	10.551
2	2570001	2580000	10	0.000683411	0.000127249	5.37066	2.4251	0.343772	9.89108
2	2580001	2590000	16	0.000653781	0.000185195	3.53023	1.81976	0.397898	8.43948
2	2590001	2600000	14	0.000777272	0.000169851	4.5762	2.19415	0.475947	5.7686
2	7150001	7160000	28	0.0020207	0.000507693	3.98016	1.99283	0.532248	4.91886
2	7160001	7170000	10	0.00122685	0.000167989	7.30316	2.86852	0.383708	6.70903
2	7170001	7180000	29	0.00182072	0.000534149	3.40864	1.76919	0.513969	2.42319
2	9440001	9450000	14	0.000776981	0.000317998	2.44335	1.28886	0.390501	7.7545
2	9460001	9470000	30	0.00153398	0.000695013	2.20712	1.14217	0.333781	4.50707
2	9470001	9480000	19	0.00102469	0.000325963	3.14358	1.65241	0.411779	2.74242
2	20990001	21000000	23	0.000833132	0.000386524	2.15545	1.10799	0.394303	2.81559
2	21280001	21290000	71	0.00314263	0.000996659	3.15316	1.6568	0.423211	15.4242
2	21300001	21310000	34	0.00162046	0.000576215	2.81225	1.49172	0.612463	13.793
2	21310001	21320000	27	0.0034458	0.000393133	8.76497	3.13175	0.538679	10.5952
2	21320001	21330000	37	0.00268286	0.000450018	5.96167	2.57572	0.535166	8.1331
2	21330001	21340000	50	0.0018361	0.000751365	2.44369	1.28906	0.418951	10.5255
2	21350001	21360000	34	0.00106503	0.000509294	2.09119	1.06432	0.356101	10.8556
2	21370001	21380000	85	0.00258069	0.00124464	2.07344	1.05203	0.495933	10.4567
2	21390001	21400000	22	0.00276867	0.000296577	9.33542	3.22271	0.416227	10.2267
2	21410001	21420000	15	0.000610952	0.000147627	4.13848	2.0491	0.573407	7.03238
2	29460001	29470000	12	0.000711655	0.000252116	2.82273	1.49709	0.405229	4.09322
2	39060001	39070000	30	0.00162776	0.000831908	1.95666	0.968392	0.372595	4.18328
2	39070001	39080000	18	0.0013787	0.000361385	3.81504	1.9317	0.347029	4.4784
2	44280001	44290000	12	0.000884793	0.000298694	2.96221	1.56667	0.393233	3.99095
2	74620001	74630000	28	0.00176293	0.000861734	2.04579	1.03266	0.394331	2.09786
2	75090001	75100000	86	0.00378035	0.00149481	2.52898	1.33856	0.432507	10.55
2	75100001	75110000	29	0.00317759	0.00030265	10.4992	3.39221	0.373872	11.3032
2	75110001	75120000	47	0.00245899	0.000361116	6.80942	2.76753	0.650916	10.3085
2	75120001	75130000	20	0.00170138	0.000259259	6.56247	2.71424	0.478905	9.21093
2	75130001	75140000	10	0.000850695	0.000122753	6.93014	2.79288	0.433429	4.9592
2	75140001	75150000	10	0.000731503	0.000102913	7.10797	2.82944	0.433514	3.03692
2	84610001	84620000	81	0.00361927	0.00136251	2.65633	1.40943	0.350738	2.17544
2	84700001	84710000	26	0.000822787	0.000420952	1.95459	0.966863	0.340398	2.33237
2	84860001	84870000	27	0.00118218	0.000633412	1.86637	0.900234	0.369174	2.05047
2	84960001	84970000	28	0.0010343	0.000550794	1.87783	0.90907	0.361753	2.50584
2	85660001	85670000	26	0.00135248	0.000383085	3.5305	1.81987	0.489991	6.56936
2	85670001	85680000	23	0.00123688	0.000252924	4.89032	2.28993	0.557234	5.72003
2	85690001	85700000	16	0.000504567	0.000120372	4.19173	2.06755	0.826003	9.32262
2	85700001	85710000	14	0.00090375	0.000113228	7.98168	2.99669	0.594811	5.10899
3	200001	210000	76	0.00549277	0.00160942	3.41289	1.77099	0.344412	2.23903
3	3600001	3610000	62	0.0036383	0.00142401	2.55497	1.35331	0.462284	5.58504
3	9650001	9660000	65	0.00262841	0.00103443	2.54093	1.34535	0.345331	2.13126
3	9940001	9950000	12	0.000682701	0.000207937	3.28321	1.71511	0.352336	1.94318
3	14670001	14680000	19	0.00153738	0.000356883	4.3078	2.10695	0.368284	4.94812
3	16860001	16870000	12	0.000714422	0.000322487	2.21535	1.14754	0.395793	4.22826
3	16870001	16880000	16	0.000908297	0.000399752	2.27215	1.18406	0.37078	2.90805
3	17060001	17070000	59	0.00266815	0.000725234	3.67902	1.87932	0.443109	2.14557
3	19880001	19890000	13	0.00132411	0.000373555	3.54462	1.82563	0.334176	2.94472
3	23620001	23630000	15	0.00146836	0.000635221	2.31157	1.20888	0.373557	9.64934
3	23820001	23830000	30	0.00187333	0.000647454	2.89338	1.53276	0.371116	3.63798
3	23830001	23840000	14	0.00110215	0.000109531	10.0624	3.33091	0.427872	5.24483
3	34880001	34890000	40	0.00201153	0.00052065	3.8635	1.94991	0.340777	2.02638
3	36950001	36960000	36	0.00119045	0.000644508	1.84707	0.885237	0.457679	2.49204
3	39400001	39410000	36	0.0015925	0.000786795	2.02403	1.01723	0.4216	5.49329
3	39410001	39420000	36	0.00147625	0.000582283	2.53528	1.34214	0.384187	3.85236
3	39420001	39430000	68	0.00269329	0.00128873	2.08988	1.06342	0.480603	2.31688
3	47060001	47070000	62	0.00184059	0.000770465	2.38893	1.25637	0.642763	3.39694
3	55040001	55050000	35	0.00120049	0.000632593	1.89773	0.924274	0.360698	3.18734
3	63670001	63680000	52	0.00245832	0.000834496	2.94587	1.5587	0.413294	2.43496
3	63840001	63850000	41	0.00216358	0.000809822	2.67167	1.41774	0.354549	6.03963
3	68980001	68990000	14	0.000512785	0.000268522	1.90966	0.933314	0.335056	3.38395
3	69000001	69010000	39	0.0017765	0.000811145	2.19011	1.13101	0.43769	3.29916
3	69780001	69790000	40	0.00166024	0.000508115	3.26745	1.70816	0.437925	6.17932
3	69790001	69800000	34	0.00141642	0.00038255	3.70257	1.88853	0.46551	6.354
3	69800001	69810000	14	0.000579802	0.000286516	2.02363	1.01694	0.404468	5.44859
3	69810001	69820000	18	0.000812872	0.000206898	3.92885	1.97411	0.393751	6.06479
3	69820001	69830000	16	0.000619541	0.000302923	2.04521	1.03225	0.432303	4.8691
3	69830001	69840000	20	0.000630354	0.000292068	2.15824	1.10986	0.420359	5.9506
3	69840001	69850000	20	0.000730935	0.000250279	2.92048	1.54621	0.399922	3.81694
3	72060001	72070000	27	0.00123768	0.000524368	2.36033	1.23899	0.387968	4.98047
3	72090001	72100000	21	0.000999201	0.000536818	1.86134	0.896342	0.363783	3.8143
3	80750001	80760000	12	0.000446258	0.000229116	1.94774	0.9618	0.372722	3.37786
3	87140001	87150000	10	0.000524884	0.000143122	3.66739	1.87475	0.651335	15.9064
3	87150001	87160000	12	0.000662742	0.000104499	6.34209	2.66496	0.578825	13.2104
3	87160001	87170000	11	0.000508493	0.000145769	3.48835	1.80254	0.696446	12.8232
3	87170001	87180000	14	0.000791536	0.000111643	7.08988	2.82576	0.589433	12.4713
3	87180001	87190000	14	0.00123877	0.000135462	9.14478	3.19295	0.540447	12.1049
3	90950001	90960000	22	0.000690371	0.000206718	3.33968	1.73971	0.444258	8.7787
3	94740001	94750000	24	0.000951068	0.000509009	1.86847	0.901857	0.471598	4.7759
3	94750001	94760000	12	0.000606079	0.000229375	2.64231	1.4018	0.380994	3.59881
3	94760001	94770000	24	0.00102192	0.000497654	2.05347	1.03807	0.454056	2.30151
3	94790001	94800000	24	0.00107463	0.000426738	2.51824	1.33242	0.516641	2.22343
3	95370001	95380000	30	0.00123199	0.000449232	2.74244	1.45546	0.386062	3.52875
3	95380001	95390000	51	0.00201699	0.00082183	2.45427	1.29529	0.358071	3.68181
3	95630001	95640000	77	0.00311214	0.00162223	1.91843	0.939929	0.504572	5.49776
3	95640001	95650000	42	0.00358786	0.000357947	10.0234	3.32531	0.505988	10.2175
3	95650001	95660000	13	0.000796938	0.000151338	5.26595	2.39669	0.570832	12.4442
3	95660001	95670000	17	0.00150823	0.000165346	9.12166	3.1893	0.596558	14.9173
3	95680001	95690000	19	0.00106938	0.000132023	8.09995	3.01791	0.594917	7.78929
3	95690001	95700000	27	0.00186467	0.000326218	5.71602	2.51501	0.559508	4.79017
3	95700001	95710000	37	0.00165737	0.00050006	3.31434	1.72872	0.364159	2.64867
3	99500001	99510000	10	0.000744531	0.000325684	2.28605	1.19286	0.495914	3.36191
3	101240001	101250000	24	0.00139311	0.000418829	3.3262	1.73388	0.407065	2.94106
3	110910001	110920000	46	0.00199272	0.000598711	3.32835	1.73481	0.480375	2.89339
3	110940001	110950000	16	0.000406628	0.000172751	2.35384	1.23502	0.495227	4.30589
3	110950001	110960000	16	0.000612085	0.000172227	3.55394	1.82942	0.488536	3.13191
4	30001	40000	39	0.00181278	0.000785461	2.30792	1.20659	0.428858	3.09062
4	80001	90000	49	0.00243922	0.000888898	2.74409	1.45633	0.35108	2.85818
4	5280001	5290000	29	0.00158885	0.00032593	4.87482	2.28535	0.384163	3.37861
4	5290001	5300000	32	0.00162074	0.000500841	3.23604	1.69423	0.346152	2.85478
4	6100001	6110000	26	0.000858386	0.000425944	2.01526	1.01096	0.481485	2.41081
4	6350001	6360000	23	0.000810761	0.000421176	1.92499	0.944853	0.433893	6.658
4	6380001	6390000	22	0.00126368	0.00041007	3.08162	1.62369	0.588726	2.82818
4	12610001	12620000	45	0.00230263	0.000799295	2.88083	1.52648	0.375818	2.54335
4	24970001	24980000	23	0.00247547	0.000958797	2.58185	1.36841	0.572127	12.3184
4	24980001	24990000	25	0.00150968	0.000798171	1.89142	0.919473	0.560082	10.4959
4	24990001	25000000	30	0.00248692	0.00107097	2.32212	1.21544	0.522748	10.1764
4	25000001	25010000	26	0.00253666	0.000606144	4.18491	2.0652	0.348584	19.247
4	25010001	25020000	18	0.00165614	0.000453495	3.65195	1.86867	0.412704	17.2759
4	25020001	25030000	18	0.00175703	0.000437055	4.02016	2.00725	0.43096	14.6586
4	25070001	25080000	24	0.000857183	0.000381554	2.24656	1.16772	0.591066	7.69663
4	25090001	25100000	36	0.00120594	0.00049823	2.42045	1.27527	0.655279	14.2887
4	25100001	25110000	13	0.000574818	0.00025981	2.21246	1.14565	0.563147	17.1063
4	25110001	25120000	17	0.000707453	0.000297129	2.38096	1.25154	0.550986	15.4472
4	25120001	25130000	11	0.000513245	0.000242861	2.11333	1.07952	0.594328	15.0237
4	25140001	25150000	23	0.00084312	0.00037728	2.23473	1.1601	0.379441	11.2394
4	25150001	25160000	15	0.000711087	0.000371719	1.91297	0.935814	0.616978	9.37716
4	25170001	25180000	11	0.000909733	0.000224093	4.05962	2.02135	0.535931	6.7877
4	33270001	33280000	32	0.00250064	0.000630176	3.96816	1.98847	0.351036	9.52294
4	33280001	33290000	10	0.000378537	0.000106886	3.5415	1.82436	0.335014	10.2839
4	40170001	40180000	32	0.00132994	0.000672024	1.97901	0.984776	0.344553	3.21139
4	43380001	43390000	19	0.00129463	0.000389985	3.31969	1.73105	0.413415	5.18857
4	43390001	43400000	13	0.00105035	0.000189952	5.52955	2.46716	0.497013	8.13192
4	43400001	43410000	10	0.000651396	0.00032911	1.97927	0.984965	0.418449	5.28762
4	44660001	44670000	18	0.00100574	0.000490754	2.04938	1.03519	0.336236	12.371
4	44720001	44730000	35	0.00117235	0.000559579	2.09506	1.06699	0.44168	12.4549
4	44740001	44750000	18	0.000902374	0.000398154	2.26639	1.1804	0.475188	8.45599
4	44760001	44770000	42	0.00124802	0.000643704	1.93881	0.955172	0.399988	5.07646
4	69020001	69030000	19	0.00101023	0.000448444	2.25275	1.17168	0.404526	2.77293
4	69030001	69040000	24	0.000976718	0.000463551	2.10703	1.07521	0.503435	2.32355
4	84440001	84450000	23	0.000914554	0.000458233	1.99583	0.996987	0.436229	2.189
4	87570001	87580000	25	0.00115133	0.000377545	3.04952	1.60858	0.365448	3.8566
4	93210001	93220000	22	0.000839692	0.000333895	2.51484	1.33047	0.531285	5.94745
4	93220001	93230000	21	0.000758251	0.000302167	2.50938	1.32733	0.552275	8.14098
5	5750001	5760000	49	0.00233443	0.00104742	2.22874	1.15623	0.393711	1.95862
5	5760001	5770000	32	0.00228824	0.000801644	2.85443	1.5132	0.400356	3.09616
5	14530001	14540000	27	0.00301343	0.000565168	5.33192	2.41465	0.342998	3.26585
5	15650001	15660000	12	0.000750227	0.000219577	3.41669	1.7726	0.440195	2.77567
5	17920001	17930000	20	0.000961778	0.000364566	2.63815	1.39952	0.394824	4.66799
5	17990001	18000000	11	0.00345901	0.000179681	19.2508	4.26685	0.429848	11.8007
5	18000001	18010000	22	0.00154425	0.000211376	7.3057	2.86902	0.377504	9.2887
5	18020001	18030000	34	0.00208347	0.000573305	3.63414	1.86161	0.332306	13.7946
5	18090001	18100000	16	0.0013753	0.000400572	3.43334	1.77961	0.359453	16.5003
5	18100001	18110000	22	0.00191821	0.000241555	7.94109	2.98934	0.394391	13.8473
5	18110001	18120000	38	0.00140305	0.000727025	1.92985	0.94849	0.453751	12.4835
5	18120001	18130000	30	0.00153545	0.000348437	4.40668	2.13969	0.347504	15.2182
5	18150001	18160000	15	0.000894848	0.000243132	3.6805	1.8799	0.433024	7.76065
5	18160001	18170000	14	0.00156401	0.000252656	6.19027	2.63	0.435556	5.93516
5	18310001	18320000	22	0.000951711	0.000480735	1.9797	0.985282	0.436778	1.99741
5	18420001	18430000	12	0.000670512	0.000259796	2.58092	1.36788	0.364436	5.37853
5	18530001	18540000	19	0.00281751	0.00028969	9.72595	3.28184	0.538932	7.14212
5	18540001	18550000	12	0.00221647	0.000418283	5.29897	2.40571	0.55276	4.3373
5	18550001	18560000	27	0.0024117	0.00101567	2.37449	1.24762	0.502899	3.85389
5	18560001	18570000	27	0.00359196	0.000956229	3.75638	1.90934	0.544767	3.03556
5	18570001	18580000	32	0.00285198	0.00106533	2.67709	1.42066	0.551923	2.33655
5	18680001	18690000	22	0.00241344	0.000156089	15.4619	3.95065	0.370703	21.0098
5	18700001	18710000	53	0.00361028	0.000418571	8.62525	3.10857	0.428755	12.0365
5	18710001	18720000	35	0.00292084	0.000353787	8.25593	3.04543	0.426948	13.2783
5	18730001	18740000	40	0.00294646	0.00059929	4.91658	2.29766	0.348527	9.24554
5	18740001	18750000	37	0.00310604	0.000725234	4.28281	2.09856	0.380463	6.25098
5	18750001	18760000	35	0.00162374	0.000792913	2.04782	1.03409	0.334103	4.44872
5	20800001	20810000	48	0.00274776	0.000990191	2.77498	1.47248	0.340532	3.42111
5	20810001	20820000	35	0.00347811	0.000574476	6.0544	2.59799	0.392128	5.1841
5	20820001	20830000	40	0.0018377	0.000841433	2.18401	1.12698	0.457308	4.25275
5	20830001	20840000	23	0.00102063	0.000496101	2.0573	1.04075	0.418939	2.52082
5	20870001	20880000	38	0.00204808	0.000458265	4.4692	2.16002	0.454581	13.8829
5	20880001	20890000	28	0.00198713	0.000257693	7.71123	2.94696	0.353678	12.9793
5	20890001	20900000	44	0.00234779	0.000417541	5.6229	2.49131	0.441378	10.7572
5	20910001	20920000	61	0.0030113	0.00152299	1.97723	0.98348	0.356677	7.95882
5	22940001	22950000	18	0.000974485	0.000344714	2.82694	1.49924	0.411193	8.95155
5	22950001	22960000	12	0.000496558	0.000190741	2.60331	1.38035	0.424159	7.69015
5	22970001	22980000	13	0.000903419	0.000264822	3.41142	1.77037	0.403569	8.27153
5	22990001	23000000	75	0.00369345	0.00143948	2.56582	1.35942	0.353227	12.6513
5	23000001	23010000	72	0.0029076	0.00135994	2.13804	1.09629	0.460174	10.2081
5	23030001	23040000	30	0.00123869	0.000606214	2.04332	1.03092	0.450946	4.35727
5	23040001	23050000	29	0.00149135	0.000436256	3.41852	1.77337	0.37401	2.32561
5	23250001	23260000	37	0.0019306	0.0008408	2.29615	1.19921	0.394534	5.7412
5	23280001	23290000	12	0.000753872	0.00039501	1.90849	0.93243	0.41263	4.3354
5	26470001	26480000	16	0.000827588	0.000357432	2.31537	1.21124	0.335343	4.88995
5	26480001	26490000	16	0.000890061	0.000418272	2.12795	1.08946	0.358319	3.4673
5	26490001	26500000	14	0.00101436	0.000282275	3.59352	1.8454	0.345136	2.07736
5	28680001	28690000	38	0.00155412	0.000567765	2.73726	1.45273	0.505975	7.56119
5	28690001	28700000	30	0.00160341	0.000567827	2.82376	1.49762	0.420876	6.12237
5	28770001	28780000	15	0.000833494	0.000323316	2.57795	1.36623	0.484478	2.34109
5	46950001	46960000	13	0.000559128	0.00024498	2.28234	1.19051	0.33434	3.03992
5	46960001	46970000	13	0.000965756	0.000160055	6.0339	2.59309	0.34447	2.88154
5	47270001	47280000	17	0.000595244	0.000304241	1.95649	0.968267	0.359958	2.35282
5	54170001	54180000	23	0.00092396	0.000493413	1.87259	0.905035	0.344064	2.26041
5	55590001	55600000	10	0.00112382	0.000256885	4.3748	2.12922	0.34845	4.53418
5	55700001	55710000	15	0.000826921	0.000246039	3.36093	1.74886	0.457748	4.20407
5	55710001	55720000	17	0.00075029	0.000339163	2.21218	1.14547	0.453879	2.63927
5	64750001	64760000	10	0.00055124	0.000280692	1.96386	0.973693	0.340386	2.49292
5	64800001	64810000	25	0.00145785	0.000465086	3.13458	1.64827	0.355821	4.34303
5	64810001	64820000	13	0.00099004	0.000327782	3.02042	1.59475	0.3764	2.4018
5	65050001	65060000	19	0.00104283	0.000475184	2.19458	1.13395	0.385157	13.1245
5	65080001	65090000	14	0.000774971	0.000348979	2.22068	1.151	0.518602	16.0022
5	65100001	65110000	22	0.0013941	0.000592129	2.35439	1.23535	0.377821	12.3721
5	65140001	65150000	26	0.000665537	0.00034263	1.94244	0.957867	0.404243	6.49341
5	65170001	65180000	14	0.00129535	0.00031694	4.08705	2.03106	0.3675	5.92265
5	65180001	65190000	19	0.00124314	0.000484419	2.56625	1.35966	0.469076	8.46294
5	65190001	65200000	35	0.00183583	0.00038308	4.79229	2.26071	0.467449	13.6155
5	65200001	65210000	22	0.000909549	0.000224613	4.0494	2.01771	0.575532	11.7397
5	65210001	65220000	38	0.00152468	0.000344988	4.41952	2.14389	0.537572	9.49427
5	65220001	65230000	98	0.00385208	0.000936673	4.11251	2.04002	0.333357	6.40119
5	65230001	65240000	75	0.00240652	0.000915912	2.62746	1.39367	0.557158	4.8905
5	68530001	68540000	17	0.00102248	0.000220377	4.63969	2.21403	0.345277	6.79091
5	68540001	68550000	31	0.00142184	0.000399471	3.55931	1.8316	0.469541	8.98924
5	68550001	68560000	26	0.000868109	0.000322765	2.6896	1.42739	0.489173	7.3162
5	68570001	68580000	29	0.00102262	0.000422757	2.41893	1.27437	0.447987	6.99647
5	68580001	68590000	22	0.000881241	0.000262441	3.35786	1.74754	0.543604	11.2054
5	68590001	68600000	32	0.00137036	0.000268254	5.10844	2.35288	0.417451	10.6324
5	68600001	68610000	16	0.000890435	0.000153439	5.80319	2.53685	0.342304	8.38513
5	68610001	68620000	23	0.00112976	0.000311128	3.63117	1.86044	0.408751	6.90343
5	68620001	68630000	34	0.00141203	0.000486542	2.90217	1.53713	0.435491	5.64795
5	68630001	68640000	33	0.00135674	0.000537339	2.52492	1.33624	0.345487	3.54729
5	68670001	68680000	34	0.00167162	0.000448721	3.7253	1.89736	0.456891	9.59321
5	68680001	68690000	20	0.000705718	0.000268011	2.63317	1.3968	0.591624	11.8602
5	68690001	68700000	18	0.000762377	0.000310586	2.45464	1.29551	0.474746	9.50265
5	68700001	68710000	32	0.00111819	0.000553764	2.01925	1.01382	0.535995	9.06208
5	80460001	80470000	15	0.000815238	0.000139155	5.85849	2.55053	0.585584	13.3492
5	80470001	80480000	18	0.000551694	0.000193124	2.85668	1.51434	0.722272	10.9778
5	80480001	80490000	30	0.00150912	0.00032911	4.58546	2.19707	0.447768	11.6022
5	80490001	80500000	10	0.00198904	0.00012328	16.1343	4.01206	0.483084	10.4531
5	80500001	80510000	23	0.00223694	0.000241541	9.26112	3.21119	0.507897	8.34096
5	84400001	84410000	27	0.00116205	0.000331751	3.50278	1.8085	0.426922	2.62516
5	104910001	104920000	45	0.00213369	0.00114048	1.87087	0.903709	0.424841	3.17557
5	104920001	104930000	30	0.00109132	0.000497368	2.19419	1.13369	0.451288	2.03395
5	106520001	106530000	10	0.000486188	0.000134395	3.6176	1.85503	0.55411	5.51081
5	106540001	106550000	14	0.000466226	0.000240496	1.9386	0.955017	0.628551	5.6366
5	106550001	106560000	15	0.000489329	0.000195508	2.50286	1.32358	0.617296	3.88107
5	106560001	106570000	14	0.000485956	0.000243403	1.99651	0.997479	0.492131	3.21761
5	109700001	109710000	15	0.00102316	0.000562208	1.8199	0.863856	0.568314	2.08849
5	109710001	109720000	13	0.0017698	0.000589699	3.00119	1.58554	0.476359	4.47353
5	109760001	109770000	13	0.000696303	0.000178841	3.89342	1.96104	0.385177	2.87159
5	110370001	110380000	12	0.000572738	0.000254497	2.25047	1.17023	0.506293	13.4123
5	110410001	110420000	16	0.000613374	0.000186251	3.29327	1.71952	0.646436	9.92383
5	110420001	110430000	10	0.0004985	0.00021455	2.32347	1.21628	0.552108	8.52041
5	110460001	110470000	24	0.00117313	0.000427261	2.7457	1.45717	0.392438	9.02417
5	110470001	110480000	25	0.00112379	0.000551361	2.03821	1.0273	0.41582	6.8861
5	110480001	110490000	21	0.000904074	0.000435727	2.07486	1.05302	0.427223	6.35073
5	110490001	110500000	14	0.000747066	0.000263764	2.83233	1.50199	0.477233	5.66813
5	110500001	110510000	13	0.000594912	0.000319577	1.86156	0.896513	0.421795	5.21833
5	111250001	111260000	21	0.00114377	0.000565889	2.02119	1.01521	0.345562	2.39285
5	111270001	111280000	12	0.000695613	0.000186778	3.72428	1.89696	0.434023	3.57798
5	111280001	111290000	20	0.00117066	0.000281769	4.15468	2.05474	0.358476	2.07912
5	118630001	118640000	14	0.000812364	0.000373026	2.17777	1.12285	0.45168	4.13324
5	118740001	118750000	19	0.00105828	0.000521972	2.02747	1.01968	0.517591	5.2284
5	118760001	118770000	21	0.000771324	0.000407942	1.89077	0.918973	0.439372	3.52467
5	118770001	118780000	27	0.000912166	0.00043836	2.08086	1.05718	0.420083	2.49601
5	118790001	118800000	12	0.000819296	0.00021191	3.86625	1.95093	0.409286	2.54126
6	90001	100000	23	0.00109676	0.000237579	4.6164	2.20677	0.363321	6.253
6	100001	110000	12	0.000945698	0.000112437	8.41091	3.07226	0.387646	6.03591
6	110001	120000	10	0.000527758	0.000134926	3.91146	1.96771	0.422275	2.67897
6	13970001	13980000	36	0.00416013	0.00053678	7.75016	2.95423	0.37345	7.80971
6	14010001	14020000	22	0.00124567	0.000219586	5.67281	2.50406	0.603895	28.3348
6	14020001	14030000	13	0.000488399	0.000183611	2.65997	1.41141	0.48904	24.0221
6	14030001	14040000	33	0.00122325	0.000485245	2.52089	1.33393	0.603385	21.2127
6	14040001	14050000	55	0.00279039	0.000762286	3.66056	1.87206	0.437532	18.486
6	14050001	14060000	36	0.00166821	0.000373617	4.46503	2.15867	0.464076	17.3448
6	14080001	14090000	14	0.000716409	0.000138626	5.16793	2.36959	0.454972	14.0141
6	14090001	14100000	25	0.000765752	0.00031194	2.45481	1.29561	0.579506	11.9939
6	14100001	14110000	28	0.00146872	0.000331217	4.43431	2.14871	0.602347	10.4979
6	14110001	14120000	25	0.000746827	0.000403743	1.84976	0.887337	0.716514	9.63888
6	14130001	14140000	29	0.00283041	0.000493222	5.73861	2.5207	0.556002	9.43455
6	14140001	14150000	40	0.00271291	0.000744883	3.64206	1.86476	0.498632	10.1952
6	14150001	14160000	24	0.00200563	0.000461924	4.3419	2.11833	0.331709	9.83458
6	14160001	14170000	15	0.00085637	0.000239686	3.57288	1.83709	0.369612	8.44603
6	14220001	14230000	15	0.000783871	0.000375941	2.08509	1.06011	0.396951	4.15122
6	14250001	14260000	19	0.00102163	0.000540763	1.88924	0.917804	0.374185	3.58329
6	14290001	14300000	27	0.00118113	0.000477539	2.47337	1.30648	0.578923	2.78595
6	17290001	17300000	24	0.000942794	0.000462737	2.03743	1.02675	0.356993	2.49465
6	18720001	18730000	83	0.0037674	0.00198664	1.89637	0.923239	0.357808	3.14546
6	18770001	18780000	135	0.00512468	0.00136451	3.75569	1.90908	0.684796	2.30784
6	18930001	18940000	21	0.00136398	0.000497653	2.74083	1.45461	0.383662	2.525
6	32500001	32510000	43	0.00171729	0.000890586	1.92827	0.947307	0.352592	4.96009
6	36190001	36200000	34	0.0015048	0.000606144	2.48258	1.31184	0.503181	4.09354
6	36200001	36210000	27	0.000882412	0.000411663	2.14353	1.09999	0.568404	2.71288
6	36910001	36920000	21	0.000693283	0.00029895	2.31906	1.21354	0.338629	4.41899
6	36920001	36930000	11	0.000490021	0.000260589	1.88044	0.911067	0.402792	2.6173
6	46230001	46240000	21	0.00112957	0.00043836	2.57681	1.36559	0.436626	4.17312
6	47620001	47630000	50	0.00264421	0.00110331	2.39662	1.261	0.339416	2.20063
6	70360001	70370000	18	0.000949359	0.00034818	2.72663	1.44712	0.368507	4.24132
6	70370001	70380000	21	0.00152444	0.000292597	5.21003	2.38129	0.396128	5.08835
6	70400001	70410000	20	0.00204165	0.000848425	2.4064	1.26688	0.378413	3.17827
6	82800001	82810000	20	0.00115178	0.000284684	4.04582	2.01643	0.351367	3.25728
6	87360001	87370000	76	0.00257818	0.00134255	1.92036	0.941377	0.379856	2.57984
6	87370001	87380000	64	0.00277838	0.0011078	2.50802	1.32655	0.52073	2.33631
6	88820001	88830000	17	0.00106148	0.00052938	2.00514	1.0037	0.345392	4.75435
6	95470001	95480000	15	0.000967284	0.000189955	5.09217	2.34828	0.660431	21.3688
6	95530001	95540000	54	0.00380245	0.00101704	3.73874	1.90255	0.42008	17.6777
6	95570001	95580000	18	0.00082861	0.000359294	2.30622	1.20553	0.397814	18.2985
6	95650001	95660000	13	0.000697935	0.000230433	3.0288	1.59875	0.65235	14.4637
6	95670001	95680000	17	0.000771498	0.000345281	2.23441	1.15989	0.516484	9.20204
6	95700001	95710000	10	0.00159064	0.000158995	10.0043	3.32255	0.347502	5.35954
6	95710001	95720000	14	0.00185589	0.00026588	6.98018	2.80326	0.34083	3.66053
6	109180001	109190000	80	0.00371018	0.000915421	4.05298	2.01898	0.366723	2.11732
6	116750001	116760000	13	0.000771979	0.000399477	1.93247	0.950449	0.396298	2.15518
6	116920001	116930000	13	0.000720734	0.000246829	2.91997	1.54595	0.41953	4.15901
6	117240001	117250000	14	0.00136774	0.000331222	4.12938	2.04592	0.483838	4.26856
6	117250001	117260000	15	0.000844531	0.000303455	2.78305	1.47667	0.380623	2.15312
7	6980001	6990000	88	0.0031674	0.00107418	2.94867	1.56006	0.493425	3.56539
7	7000001	7010000	31	0.00120495	0.00050213	2.39968	1.26284	0.435648	2.60397
7	7050001	7060000	13	0.000892633	0.000439972	2.02884	1.02066	0.565897	6.52119
7	48610001	48620000	13	0.000688491	0.000293659	2.34453	1.2293	0.51305	2.999
7	55640001	55650000	29	0.00106284	0.000408736	2.60031	1.37868	0.362317	5.52803
7	56150001	56160000	12	0.000459707	0.00025345	1.8138	0.859013	0.363663	3.79343
7	56670001	56680000	27	0.00142882	0.000760349	1.87916	0.910091	0.46219	2.43004
7	57520001	57530000	15	0.000579359	0.000284936	2.0333	1.02382	0.443633	2.62595
7	59260001	59270000	27	0.00121022	0.000570923	2.11976	1.0839	0.458775	5.45318
7	59700001	59710000	10	0.000462859	0.0002024	2.28685	1.19336	0.483375	6.67382
7	64190001	64200000	14	0.00058015	0.000294461	1.97021	0.978349	0.370168	3.328
7	66440001	66450000	21	0.000897172	0.00048705	1.84205	0.881315	0.336521	10.635
7	66900001	66910000	25	0.000878893	0.000402127	2.18561	1.12804	0.415145	5.27318
7	67010001	67020000	11	0.000492724	0.000178836	2.75517	1.46214	0.534375	6.84955
7	67070001	67080000	18	0.000484272	0.000178321	2.71573	1.44134	0.512364	3.5699
7	70170001	70180000	18	0.00104905	0.000284412	3.68849	1.88303	0.343035	6.22526
7	70190001	70200000	19	0.000831073	0.00023493	3.53753	1.82274	0.409427	9.19231
7	78480001	78490000	18	0.001608	0.000268015	5.99966	2.58488	0.476813	3.14354
7	83040001	83050000	31	0.00141389	0.000732128	1.93121	0.949502	0.363474	2.00031
7	83120001	83130000	52	0.00277238	0.000575451	4.81775	2.26836	0.599798	2.11616
7	90780001	90790000	37	0.00122549	0.000663297	1.84757	0.885632	0.332563	5.30093
7	102860001	102870000	24	0.00136087	0.000418789	3.24954	1.70023	0.430471	3.79936
8	40001	50000	50	0.00276027	0.000475668	5.80293	2.53678	0.341337	13.6638
8	50001	60000	38	0.00288686	0.000339683	8.49869	3.08724	0.458916	12.618
8	60001	70000	42	0.00386728	0.000345517	11.1927	3.48449	0.415279	10.3271
8	70001	80000	48	0.00284246	0.000362698	7.83699	2.9703	0.455402	9.18039
8	80001	90000	41	0.00291966	0.000317738	9.18889	3.19989	0.456258	6.11511
8	90001	100000	13	0.00113042	0.000128042	8.82851	3.14217	0.501362	3.04112
8	130001	140000	11	0.000934587	0.00010979	8.5125	3.08958	0.512312	7.36196
8	140001	150000	16	0.00119132	0.00020873	5.70747	2.51285	0.510354	5.0039
8	25010001	25020000	21	0.00191101	0.000603737	3.1653	1.66234	0.644494	1.98737
8	25020001	25030000	12	0.00198881	0.000253711	7.83888	2.97065	0.694717	2.3525
8	27910001	27920000	24	0.00102208	0.000365883	2.79346	1.48205	0.521201	5.35783
8	27920001	27930000	11	0.000658335	0.000180161	3.65415	1.86954	0.614029	2.19621
8	30700001	30710000	18	0.000699703	0.000352135	1.98703	0.990614	0.349118	4.44089
8	33210001	33220000	26	0.00101412	0.000442925	2.2896	1.19509	0.516314	12.5872
8	33220001	33230000	35	0.00147193	0.000568317	2.58998	1.37294	0.403019	10.3477
8	33230001	33240000	39	0.00140546	0.000701156	2.00449	1.00324	0.33848	8.18848
8	33250001	33260000	49	0.00194188	0.000973607	1.99452	0.996043	0.377171	4.88326
8	33260001	33270000	61	0.00234807	0.00122947	1.90982	0.933439	0.353499	3.47099
8	33310001	33320000	55	0.00236183	0.00102655	2.30075	1.2021	0.394379	4.6426
8	33320001	33330000	64	0.00471011	0.000774107	6.08457	2.60516	0.360865	4.96543
8	33330001	33340000	98	0.00442263	0.00134535	3.28735	1.71692	0.452668	5.98279
8	33340001	33350000	105	0.00408049	0.00173738	2.34865	1.23183	0.536789	6.17962
8	33380001	33390000	30	0.0013134	0.000601638	2.18304	1.12634	0.351543	3.6646
8	33650001	33660000	54	0.00190308	0.000647983	2.93693	1.55431	0.335861	2.22696
8	33660001	33670000	36	0.00162598	0.000650919	2.49798	1.32076	0.45049	2.27007
8	38650001	38660000	19	0.000744169	0.000404514	1.83966	0.879441	0.40439	6.77015
8	38730001	38740000	14	0.000722771	0.000326464	2.21394	1.14661	0.364526	5.11746
8	39700001	39710000	21	0.000689133	0.000351889	1.95838	0.969662	0.387745	11.1307
8	39710001	39720000	32	0.00118397	0.000645822	1.83328	0.874424	0.402412	9.26524
8	39760001	39770000	11	0.000617549	0.000178312	3.46331	1.79215	0.427927	6.77746
8	39780001	39790000	12	0.000475498	0.000247097	1.92434	0.944362	0.647362	2.92519
8	40190001	40200000	28	0.00118474	0.000569383	2.08074	1.0571	0.365217	2.56354
8	40200001	40210000	13	0.000934387	0.000180426	5.17878	2.37261	0.367201	2.14466
8	43020001	43030000	28	0.00108457	0.000419612	2.5847	1.37	0.384162	3.12965
8	43040001	43050000	23	0.000966854	0.00035558	2.71909	1.44312	0.487925	3.34515
8	43520001	43530000	12	0.000726276	0.000237302	3.06056	1.61379	0.467224	3.06401
8	43550001	43560000	39	0.00137245	0.000690496	1.98763	0.991049	0.410885	3.15143
8	44200001	44210000	16	0.000777409	0.000411921	1.88728	0.916306	0.339897	3.80284
8	44270001	44280000	27	0.00162485	0.000510124	3.18521	1.67139	0.350976	9.12224
8	44360001	44370000	25	0.00117591	0.000627513	1.87392	0.90606	0.337541	4.77577
8	60880001	60890000	26	0.00131884	0.000502395	2.62511	1.39238	0.444242	2.24467
8	60890001	60900000	25	0.0010394	0.000547143	1.89969	0.925761	0.363912	3.069
8	61650001	61660000	37	0.00137779	0.000644745	2.13695	1.09556	0.373408	3.71261
8	61660001	61670000	18	0.000751413	0.000310855	2.41725	1.27336	0.35718	3.01276
8	68910001	68920000	20	0.000949325	0.000441018	2.15258	1.10606	0.356741	2.45639
8	69500001	69510000	30	0.00121879	0.000602688	2.02226	1.01597	0.405215	1.94336
8	69730001	69740000	39	0.0013976	0.000751598	1.8595	0.894918	0.430369	3.49371
8	72210001	72220000	36	0.00139888	0.000656945	2.12937	1.09043	0.391693	3.79025
8	73470001	73480000	25	0.000712255	0.000332034	2.14513	1.10106	0.563587	4.43169
8	73480001	73490000	17	0.000719919	0.000210056	3.42727	1.77706	0.422202	2.82286
8	100970001	100980000	45	0.00201805	0.00103843	1.94337	0.958558	0.362655	6.05782
8	103060001	103070000	34	0.00134439	0.000727829	1.84712	0.88528	0.341459	2.25967
8	105390001	105400000	29	0.00139063	0.000430453	3.23062	1.69181	0.422705	7.37669
8	105400001	105410000	36	0.00172174	0.00040743	4.22585	2.07924	0.599484	5.89692
8	105410001	105420000	16	0.000985574	0.000236518	4.16701	2.05901	0.487199	3.85997
8	105440001	105450000	14	0.00048353	0.000218525	2.2127	1.14581	0.572446	2.08485
9	210001	220000	30	0.00101602	0.000454012	2.23787	1.16213	0.457987	4.82851
9	220001	230000	20	0.000624524	0.000280427	2.22705	1.15513	0.433634	3.98213
9	260001	270000	45	0.0022104	0.000865453	2.55404	1.35278	0.344826	2.58591
9	350001	360000	33	0.00280582	0.00116337	2.4118	1.27011	0.361637	3.66684
9	380001	390000	35	0.001773	0.000716442	2.47473	1.30727	0.333363	5.95354
9	430001	440000	35	0.00184311	0.000958533	1.92284	0.943242	0.352943	3.62543
9	440001	450000	61	0.00314254	0.000851094	3.69235	1.88454	0.351806	2.28043
9	12480001	12490000	21	0.000894459	0.000391556	2.28437	1.1918	0.473668	10.1575
9	12500001	12510000	25	0.00360831	0.000463247	7.78917	2.96147	0.364537	7.34912
9	12550001	12560000	26	0.00141525	0.000529183	2.67441	1.41922	0.422752	3.10054
9	17290001	17300000	18	0.0011485	0.000560605	2.04868	1.03469	0.347028	2.74526
9	18860001	18870000	18	0.000952969	0.000438126	2.1751	1.12108	0.381578	5.29982
9	18890001	18900000	15	0.00130395	0.000417225	3.12529	1.64399	0.349775	3.36487
9	25420001	25430000	60	0.00265945	0.000920724	2.88843	1.53029	0.344064	2.76322
9	28860001	28870000	16	0.00114204	0.000464828	2.45691	1.29684	0.363398	3.44587
9	28920001	28930000	13	0.000621221	0.000277786	2.23633	1.16113	0.405718	4.08397
9	28950001	28960000	35	0.00131522	0.000521987	2.51964	1.33322	0.340967	8.39989
9	29040001	29050000	29	0.000869419	0.000469654	1.85119	0.888453	0.469013	4.23466
9	29050001	29060000	31	0.00159781	0.000292633	5.46012	2.44893	0.430144	3.13733
9	29070001	29080000	34	0.001226	0.000501691	2.44374	1.28909	0.396566	2.10347
9	29080001	29090000	22	0.00116681	0.000309016	3.77589	1.91682	0.495345	6.77241
9	29090001	29100000	14	0.00104578	0.000130956	7.98574	2.99743	0.395607	5.10557
9	29100001	29110000	29	0.00108092	0.000460872	2.34538	1.22982	0.57565	3.46039
9	29110001	29120000	21	0.00112455	0.000243141	4.62509	2.20948	0.48176	3.16497
9	29140001	29150000	12	0.00094904	0.000282808	3.35577	1.74665	0.337625	4.37918
9	29910001	29920000	36	0.00160268	0.000697933	2.29632	1.19933	0.41915	6.43918
9	29930001	29940000	17	0.000789592	0.00035901	2.19936	1.13708	0.374711	5.85622
9	29980001	29990000	24	0.00152638	0.000515121	2.96315	1.56713	0.402372	10.5858
9	30050001	30060000	23	0.000965899	0.000439717	2.19664	1.1353	0.365089	4.76484
9	30070001	30080000	22	0.000853675	0.0003524	2.42246	1.27647	0.365799	2.12488
9	31780001	31790000	14	0.000600819	0.000215882	2.78309	1.47669	0.577428	2.37827
9	49500001	49510000	36	0.00185148	0.000995321	1.86018	0.895445	0.543594	6.7811
9	49510001	49520000	12	0.00180928	0.000307937	5.87549	2.55471	0.634739	7.24466
9	49520001	49530000	10	0.00121112	0.000235721	5.13794	2.36119	0.640639	6.2722
9	52240001	52250000	36	0.00145336	0.000664068	2.18857	1.12999	0.414737	2.69789
9	54150001	54160000	67	0.00348085	0.00107983	3.22352	1.68864	0.475341	2.48686
9	56730001	56740000	45	0.00183641	0.00091076	2.01635	1.01175	0.408376	8.976
9	56800001	56810000	12	0.000536257	0.000187833	2.85497	1.51347	0.60983	13.0294
9	56820001	56830000	17	0.000695735	0.000290745	2.39294	1.25878	0.37496	10.4374
9	56860001	56870000	11	0.000897022	0.000200802	4.4672	2.15937	0.395555	6.51227
9	61080001	61090000	68	0.00241517	0.000965017	2.50272	1.3235	0.450623	4.94936
9	61100001	61110000	57	0.00145545	0.00080261	1.8134	0.858694	0.732157	10.2062
9	61110001	61120000	23	0.000803537	0.000319626	2.51399	1.32998	0.542319	8.23788
9	61130001	61140000	22	0.000946609	0.000348697	2.7147	1.44079	0.411492	3.70887
9	62070001	62080000	37	0.00158398	0.000851106	1.86108	0.896143	0.338201	2.67992
9	65540001	65550000	64	0.00209367	0.00112958	1.85349	0.890248	0.554104	7.98935
9	65620001	65630000	146	0.00534765	0.00290126	1.84322	0.882225	0.350444	7.20036
9	65650001	65660000	47	0.0015071	0.000485782	3.10242	1.63339	0.331773	4.66001
9	67570001	67580000	26	0.00126979	0.00055638	2.28224	1.19045	0.346692	2.58043
9	77390001	77400000	34	0.00246072	0.000820946	2.99742	1.58372	0.52357	7.2752
9	77400001	77410000	31	0.00237931	0.000610608	3.89662	1.96222	0.476321	7.10161
9	77410001	77420000	51	0.00366874	0.000622808	5.89064	2.55843	0.348542	4.97999
9	77420001	77430000	65	0.00333761	0.00124384	2.68331	1.42401	0.480045	3.77447
10	5400001	5410000	51	0.00344066	0.00113994	3.01828	1.59373	0.416894	2.65523
10	16270001	16280000	18	0.000759181	0.000273288	2.77795	1.47402	0.361049	2.76958
10	30660001	30670000	19	0.00099725	0.000377529	2.64152	1.40137	0.419582	3.01331
10	30680001	30690000	19	0.000932689	0.000454504	2.0521	1.0371	0.383726	2.0019
10	37840001	37850000	30	0.00260808	0.00113363	2.30064	1.20204	0.35069	2.03118
10	45970001	45980000	37	0.00150405	0.000684685	2.1967	1.13534	0.535606	3.33039
10	62760001	62770000	72	0.0027433	0.00114597	2.39387	1.25934	0.554403	2.90956
10	62770001	62780000	30	0.00335971	0.000994208	3.37928	1.75672	0.59768	2.36855
10	71360001	71370000	25	0.00156765	0.000813537	1.92696	0.946324	0.41953	3.37091
10	71480001	71490000	11	0.000793162	8.51852e-05	9.31103	3.21894	0.396565	26.8564
10	71490001	71500000	14	0.000612096	0.000125399	4.88119	2.28723	0.681423	26.0615
10	71500001	71510000	14	0.000702472	0.000111117	6.32191	2.66036	0.641668	24.3167
10	71550001	71560000	10	0.000784357	7.14286e-05	10.981	3.45694	0.665544	35.2249
10	71590001	71600000	13	0.00102978	9.94709e-05	10.3526	3.37192	0.54853	19.7871
10	71620001	71630000	11	0.000443674	0.000128838	3.44366	1.78394	0.624454	9.70728
10	71640001	71650000	17	0.000786186	0.000247361	3.17829	1.66825	0.508204	4.63625
10	71650001	71660000	19	0.000698974	0.000369597	1.89118	0.919286	0.557688	5.84244
10	71680001	71690000	26	0.0013561	0.000681255	1.99059	0.993197	0.439038	2.28419
10	76070001	76080000	26	0.0054198	0.000855062	6.33849	2.66414	0.552926	3.72531
10	77450001	77460000	110	0.00206888	0.00100845	2.05154	1.03671	0.403505	2.96485
10	78900001	78910000	64	0.00250578	0.001059	2.36618	1.24256	0.464763	2.02676
10	80580001	80590000	15	0.00141585	0.000338889	4.17792	2.06278	0.4926	10.08
10	80600001	80610000	56	0.00198244	0.00108829	1.82161	0.865214	0.360395	7.24544
10	82290001	82300000	11	0.000808096	0.000310847	2.59966	1.37832	0.332168	18.2989
10	82330001	82340000	12	0.000605359	0.000238366	2.53962	1.34461	0.404099	18.7831
10	82350001	82360000	11	0.000455418	0.000187838	2.42453	1.2777	0.363437	20.1425
10	82410001	82420000	13	0.000710622	0.00034419	2.06462	1.04588	0.347067	16.2815
10	94300001	94310000	10	0.00064647	0.000264301	2.44596	1.2904	0.396115	4.37473
10	94340001	94350000	13	0.000959368	0.000396848	2.41747	1.2735	0.535669	5.15052
10	94360001	94370000	11	0.00155499	0.000149206	10.4218	3.38153	0.585001	3.57355
10	94410001	94420000	15	0.000705229	0.000210317	3.35317	1.74553	0.736964	6.85068
10	94660001	94670000	22	0.00180973	0.000509552	3.55161	1.82847	0.351721	3.07514
11	12450001	12460000	10	0.000674377	0.000285193	2.36463	1.24162	0.362003	2.84117
11	13340001	13350000	35	0.00157402	0.0008408	1.87205	0.904619	0.383364	3.67018
11	14070001	14080000	65	0.00394185	0.00127564	3.0901	1.62765	0.334497	12.5248
11	14110001	14120000	46	0.00169735	0.000701852	2.41839	1.27405	0.616225	5.3296
11	14690001	14700000	17	0.00086601	0.00037939	2.28264	1.1907	0.373003	2.22075
11	14740001	14750000	15	0.00076319	0.000316402	2.41209	1.27028	0.380335	5.63119
11	14760001	14770000	22	0.000894069	0.000455039	1.96482	0.974396	0.366283	14.0752
11	14770001	14780000	13	0.000645797	0.000282038	2.28975	1.19519	0.380394	12.8389
11	14780001	14790000	11	0.000698988	0.00014233	4.91104	2.29603	0.475882	13.7314
11	14790001	14800000	15	0.00108455	0.000190212	5.7018	2.51142	0.562416	10.3309
11	14800001	14810000	12	0.000628723	0.000147619	4.25909	2.09055	0.658299	7.64225
11	14960001	14970000	34	0.00115061	0.000610147	1.88579	0.91517	0.347181	7.61255
11	14970001	14980000	30	0.00108693	0.000583622	1.86239	0.897153	0.483587	6.44186
11	21380001	21390000	40	0.00210142	0.00109799	1.91388	0.9365	0.406999	2.01373
11	28290001	28300000	27	0.00164098	0.000527043	3.11356	1.63857	0.359458	3.61914
11	28330001	28340000	21	0.000655431	0.000349745	1.87403	0.90614	0.62987	10.6111
11	28340001	28350000	15	0.000795747	0.000230956	3.44545	1.78469	0.566481	8.58572
11	28360001	28370000	27	0.000782187	0.000413774	1.89037	0.918671	0.558953	5.60288
11	28390001	28400000	28	0.0011593	0.000430744	2.69139	1.42835	0.434375	2.48213
11	43260001	43270000	11	0.000786085	0.00038626	2.03512	1.02511	0.40233	8.43715
11	43560001	43570000	19	0.00248696	0.000644763	3.85717	1.94754	0.343418	4.93626
11	48360001	48370000	16	0.0010673	0.000356893	2.99053	1.5804	0.421704	2.9456
11	54880001	54890000	41	0.00277169	0.000397652	6.97014	2.80119	0.352273	7.162
11	54890001	54900000	56	0.00185071	0.000721891	2.5637	1.35823	0.478275	4.76705
11	54900001	54910000	49	0.00190835	0.00101975	1.87139	0.90411	0.408694	2.81831
11	62350001	62360000	17	0.00110697	0.000437338	2.53115	1.3398	0.366848	2.06099
11	62650001	62660000	15	0.000778244	0.000362713	2.14562	1.10139	0.416847	5.32438
11	66590001	66600000	13	0.00112124	0.000374095	2.99721	1.58362	0.426858	1.92492
11	69680001	69690000	17	0.00120658	0.00049631	2.4311	1.28161	0.566248	4.18034
11	69690001	69700000	17	0.00147387	0.000365903	4.02803	2.01008	0.577567	4.54477
11	69700001	69710000	15	0.00114956	0.00053019	2.1682	1.1165	0.617539	3.95581
11	69740001	69750000	15	0.000971868	0.0004286	2.26754	1.18113	0.342736	2.08311
11	69750001	69760000	18	0.00162352	0.000548413	2.9604	1.56579	0.359673	2.20603
11	72050001	72060000	29	0.00152324	0.000830493	1.83414	0.875103	0.41335	2.61974
11	78130001	78140000	19	0.0022188	0.000392868	5.6477	2.49766	0.392446	12.752
11	78170001	78180000	62	0.00244795	0.0010088	2.4266	1.27893	0.443256	17.0019
11	78180001	78190000	30	0.00183806	0.000648239	2.83547	1.50359	0.679412	18.5319
11	79240001	79250000	25	0.00180093	0.000386783	4.65618	2.21915	0.511003	4.34206
11	90960001	90970000	57	0.00197115	0.00108131	1.82293	0.866257	0.403746	3.83869
11	93920001	93930000	16	0.000797096	0.000210596	3.78495	1.92028	0.353889	2.46326
11	94380001	94390000	17	0.000681236	0.000327272	2.08156	1.05766	0.513409	7.73626
11	94540001	94550000	16	0.00100536	0.000224077	4.48667	2.16565	0.585897	13.0071
11	94560001	94570000	12	0.000506397	0.000175933	2.87835	1.52524	0.619313	10.2982
11	94590001	94600000	13	0.000502802	0.000118257	4.25177	2.08806	0.675344	12.7504
11	94610001	94620000	13	0.000386538	0.000208739	1.85178	0.88891	0.663027	4.8095
11	96890001	96900000	14	0.000760997	0.000303968	2.50354	1.32397	0.553334	10.167
11	96900001	96910000	12	0.00105545	0.000204497	5.1612	2.36771	0.495376	11.6019
11	96910001	96920000	18	0.000897296	0.00045	1.99399	0.995659	0.439031	9.11385
11	98640001	98650000	24	0.00132059	0.000541549	2.43854	1.28602	0.352454	4.86448
11	105400001	105410000	27	0.00102318	0.000425968	2.40201	1.26424	0.605925	2.89916
11	105410001	105420000	22	0.0010044	0.000370376	2.71184	1.43927	0.476447	2.28331
11	105420001	105430000	26	0.00113575	0.00042144	2.69493	1.43025	0.535982	3.02268
11	105820001	105830000	33	0.00115874	0.000615882	1.88143	0.911831	0.471224	4.04236
11	105850001	105860000	15	0.00102639	0.000306622	3.34741	1.74305	0.407102	3.58014
11	105860001	105870000	23	0.00159359	0.000476468	3.34459	1.74183	0.395489	2.38887
12	10430001	10440000	15	0.000653255	0.000318805	2.04907	1.03497	0.339404	3.46072
12	14540001	14550000	17	0.000491842	0.00027044	1.81867	0.862886	0.382028	4.06578
12	17910001	17920000	53	0.00136856	0.000733934	1.86469	0.898936	0.352503	3.00871
12	20130001	20140000	94	0.00435573	0.00175698	2.4791	1.30982	0.500033	2.32113
12	21270001	21280000	99	0.00363012	0.00131978	2.75055	1.45972	0.48295	5.55878
12	21280001	21290000	77	0.00381127	0.00110588	3.44637	1.78508	0.44306	3.57877
12	21290001	21300000	50	0.00309657	0.00057227	5.41103	2.4359	0.413525	2.71693
12	32380001	32390000	30	0.00180618	0.000827824	2.18184	1.12555	0.333981	2.83976
12	50100001	50110000	12	0.000654258	0.000243654	2.68519	1.42503	0.342128	8.54298
12	50120001	50130000	16	0.000591366	0.000308483	1.91701	0.93886	0.493841	8.83644
12	50140001	50150000	11	0.000453551	0.000247623	1.83162	0.873119	0.332729	9.65634
12	50190001	50200000	16	0.00075066	0.000291282	2.57709	1.36574	0.476335	10.0209
12	50210001	50220000	11	0.000756918	0.00028361	2.66887	1.41623	0.432284	6.03062
12	50220001	50230000	10	0.000354475	0.000180955	1.95891	0.970053	0.54366	4.63187
12	50530001	50540000	26	0.00119793	0.000448702	2.66977	1.41671	0.434199	15.2957
12	50670001	50680000	12	0.000673092	0.000315886	2.13081	1.0914	0.506873	14.8715
12	50730001	50740000	29	0.00141178	0.000722263	1.95466	0.966919	0.559693	13.6934
12	50740001	50750000	13	0.00156071	0.000327792	4.76128	2.25135	0.386205	11.8353
12	50770001	50780000	14	0.00105088	0.000233601	4.49861	2.16948	0.519461	9.12209
12	50800001	50810000	12	0.000784052	0.000322765	2.42917	1.28047	0.334281	6.44429
12	51050001	51060000	10	0.000328825	0.000116138	2.83133	1.50148	0.339718	34.105
12	51060001	51070000	15	0.00047469	0.000139157	3.41118	1.77027	0.369941	32.5333
12	51120001	51130000	12	0.000734878	0.000130425	5.63449	2.49428	0.44525	21.4982
12	51130001	51140000	14	0.000697013	0.000218522	3.18967	1.67341	0.532966	20.0756
12	51140001	51150000	13	0.000736743	0.000216402	3.40451	1.76745	0.45274	18.3188
12	51150001	51160000	11	0.000713589	0.000218783	3.26163	1.70559	0.420065	16.0138
12	51160001	51170000	13	0.000797228	0.000290745	2.74202	1.45524	0.376589	18.6737
12	51220001	51230000	20	0.000596665	0.000267993	2.22642	1.15473	0.445389	20.628
12	51250001	51260000	22	0.000735089	0.000385731	1.9057	0.930324	0.444909	20.3756
12	51270001	51280000	11	0.000484816	0.000262706	1.84547	0.883988	0.565718	19.1761
12	51290001	51300000	23	0.0011148	0.000414821	2.68742	1.42622	0.360032	15.2675
12	51300001	51310000	31	0.00151536	0.000657188	2.30582	1.20528	0.396344	14.5617
12	51310001	51320000	19	0.00116284	0.000439449	2.64613	1.40388	0.531092	14.1581
12	51350001	51360000	17	0.000795271	0.000390228	2.03796	1.02713	0.497525	4.07727
12	57450001	57460000	21	0.000635558	0.00032542	1.95304	0.965721	0.362814	8.96026
12	57460001	57470000	24	0.000925229	0.000435745	2.12333	1.08633	0.473441	13.429
12	57470001	57480000	13	0.000599889	0.000286508	2.09379	1.06612	0.437647	11.1498
12	57480001	57490000	14	0.000691186	0.000299752	2.30586	1.2053	0.444637	10.3362
12	57500001	57510000	17	0.00102736	0.000343136	2.99403	1.58209	0.489021	5.33507
12	57510001	57520000	18	0.000630576	0.000286255	2.20285	1.13937	0.454182	3.87781
12	57520001	57530000	16	0.000912728	0.000454239	2.00936	1.00673	0.41156	1.9278
12	57610001	57620000	52	0.00211679	0.0011289	1.87509	0.90696	0.333431	2.86148
12	59730001	59740000	36	0.00180266	0.000412169	4.37359	2.12882	0.505287	3.10621
12	59740001	59750000	51	0.00267785	0.00111254	2.40697	1.26722	0.424443	4.09338
12	59750001	59760000	33	0.00162686	0.000427519	3.80535	1.92803	0.456769	7.48203
12	59760001	59770000	59	0.00208844	0.00101927	2.04896	1.03489	0.429505	6.31422
12	59830001	59840000	55	0.0021214	0.000756526	2.80413	1.48756	0.597525	3.25916
12	60860001	60870000	11	0.000513836	0.000265884	1.93256	0.950511	0.460368	9.69575
12	60870001	60880000	12	0.00062719	0.000142067	4.41475	2.14233	0.363211	13.8381
12	60880001	60890000	14	0.000717797	0.000213233	3.36626	1.75115	0.55665	15.0355
12	60890001	60900000	14	0.000639054	0.000189423	3.37369	1.75433	0.460527	16.2178
12	60900001	60910000	24	0.00108694	0.000273556	3.97337	1.99036	0.433374	15.8338
12	60910001	60920000	17	0.000603977	0.000219051	2.75724	1.46323	0.444732	13.0855
12	60920001	60930000	17	0.00121627	0.000182288	6.67224	2.73817	0.37924	10.3525
12	60930001	60940000	15	0.000745249	0.000168527	4.42213	2.14474	0.489051	8.06625
12	60940001	60950000	13	0.000585714	0.000169577	3.45397	1.78826	0.527718	4.64003
12	62690001	62700000	31	0.00174344	0.000797503	2.18612	1.12837	0.342309	4.70708
12	66760001	66770000	14	0.000815935	0.000262198	3.1119	1.6378	0.498635	4.4946
13	22090001	22100000	15	0.000825126	0.000278333	2.96453	1.5678	0.37515	6.66558
13	22110001	22120000	10	0.000520098	0.000240476	2.16279	1.11289	0.349011	11.4257
13	22190001	22200000	22	0.000985403	0.000510144	1.93162	0.949809	0.386765	20.0303
13	22200001	22210000	19	0.00125835	0.000522295	2.40927	1.2686	0.404697	18.5574
13	22210001	22220000	21	0.001145	0.000541307	2.11525	1.08083	0.405129	25.4845
13	22220001	22230000	23	0.00167252	0.000607243	2.75428	1.46168	0.389401	30.0902
13	22250001	22260000	15	0.00112871	0.000414326	2.72421	1.44584	0.406177	28.7485
13	22260001	22270000	15	0.000809314	0.000389181	2.07953	1.05626	0.500428	27.3152
13	22290001	22300000	11	0.000631754	0.000288383	2.19068	1.13138	0.489532	31.0652
13	22310001	22320000	15	0.000771675	0.000407413	1.89409	0.921501	0.49995	25.6265
13	22340001	22350000	11	0.000529167	0.000231227	2.28852	1.19441	0.45785	18.4577
13	22360001	22370000	17	0.000871277	0.000338898	2.57091	1.36228	0.395808	13.8856
13	22380001	22390000	10	0.0012132	0.000254497	4.76705	2.2531	0.460986	9.15673
13	22410001	22420000	18	0.000837081	0.000332015	2.52121	1.33412	0.426899	12.5922
13	32730001	32740000	36	0.00134465	0.000742105	1.81194	0.857535	0.338049	4.75777
13	32740001	32750000	50	0.00181222	0.000910117	1.99119	0.993634	0.465622	6.78648
13	32750001	32760000	43	0.00271628	0.000554022	4.90284	2.29362	0.507563	6.36872
13	32760001	32770000	20	0.00108183	0.000503239	2.14973	1.10416	0.413105	4.48356
13	32780001	32790000	34	0.00161142	0.000770127	2.09241	1.06516	0.37317	3.08986
13	32810001	32820000	27	0.00143414	0.000417782	3.43275	1.77936	0.441105	5.66182
13	32820001	32830000	17	0.000936397	0.000470383	1.99071	0.993284	0.361781	5.16762
13	32850001	32860000	26	0.00114231	0.000572254	1.99616	0.997227	0.462234	9.41741
13	32860001	32870000	15	0.000820929	0.000331486	2.47651	1.30831	0.522758	7.67416
13	32880001	32890000	16	0.000563557	0.000303977	1.85395	0.890599	0.429901	4.0027
13	32890001	32900000	23	0.00091236	0.000375682	2.42854	1.28009	0.363292	2.07912
13	40210001	40220000	26	0.0010744	0.00044949	2.39026	1.25717	0.567523	13.2436
13	40220001	40230000	40	0.00162355	0.000632628	2.56636	1.35972	0.562492	11.5211
13	40230001	40240000	21	0.000938148	0.000334675	2.80316	1.48705	0.634635	12.8903
13	40260001	40270000	19	0.00110939	0.000159528	6.9542	2.79789	0.428323	10.9555
13	40270001	40280000	29	0.00174568	0.000261397	6.67827	2.73947	0.566067	9.98156
13	40280001	40290000	15	0.00105078	0.000137568	7.63826	2.93324	0.443372	8.8452
13	40290001	40300000	10	0.000745092	8.91569e-05	8.35709	3.063	0.431135	5.90021
13	40300001	40310000	17	0.00109692	0.000207416	5.2885	2.40286	0.512797	2.56878
13	49950001	49960000	81	0.0020266	0.00102379	1.97951	0.985142	0.587644	6.24392
13	49960001	49970000	58	0.00240808	0.000717221	3.35751	1.74739	0.494435	5.33785
13	49970001	49980000	31	0.00185168	0.000432594	4.28041	2.09775	0.46486	4.50122
13	50590001	50600000	11	0.00124554	0.000273813	4.54887	2.18551	0.370925	3.37164
13	50640001	50650000	25	0.0012236	0.000389958	3.13777	1.64974	0.402529	5.39496
13	58530001	58540000	13	0.000940738	0.000247884	3.79507	1.92413	0.450991	6.59891
13	58540001	58550000	12	0.000618899	0.000240215	2.57644	1.36538	0.555655	5.7994
13	58550001	58560000	13	0.00114794	0.000254504	4.5105	2.17329	0.433276	5.91533
13	58560001	58570000	20	0.00168004	0.00041853	4.01414	2.00509	0.368955	4.18826
13	58570001	58580000	32	0.00156273	0.000713787	2.18935	1.1305	0.406445	2.42648
13	63180001	63190000	16	0.000821758	0.000436261	1.88364	0.913522	0.440618	4.36805
13	63190001	63200000	16	0.000713951	0.000248681	2.87095	1.52153	0.468361	3.32217
13	63260001	63270000	10	0.000545433	9.78836e-05	5.57226	2.47826	0.538272	9.23784
13	63270001	63280000	16	0.000600371	0.000183865	3.26528	1.70721	0.598294	6.07481
13	63540001	63550000	35	0.00135086	0.000634683	2.1284	1.08977	0.374786	6.44561
13	63550001	63560000	19	0.000801108	0.000429894	1.8635	0.898016	0.427238	4.23513
13	63570001	63580000	34	0.0011729	0.000636367	1.84312	0.882149	0.396825	3.01339
13	73240001	73250000	58	0.0035372	0.000680519	5.1978	2.3779	0.393368	2.68725
13	73250001	73260000	40	0.00239975	0.000990865	2.42187	1.27612	0.348293	2.13053
13	76710001	76720000	23	0.00091651	0.000447096	2.04992	1.03557	0.359861	2.04951
13	76730001	76740000	13	0.000894002	0.000301079	2.96933	1.57014	0.505014	9.76087
13	76840001	76850000	14	0.000907642	0.000433616	2.09319	1.06571	0.374839	8.75826
13	76870001	76880000	10	0.000654832	0.000277521	2.35958	1.23853	0.60975	5.90569
13	76890001	76900000	10	0.000681675	0.000183338	3.71813	1.89458	0.381604	3.88445
14	16120001	16130000	55	0.00218511	0.00103381	2.11365	1.07973	0.450368	10.7044
14	16130001	16140000	33	0.00138427	0.000668027	2.07218	1.05115	0.500213	9.32977
14	16140001	16150000	22	0.00123836	0.000314042	3.94329	1.9794	0.539697	11.2455
14	16150001	16160000	19	0.00150105	0.000188095	7.98028	2.99644	0.567539	11.2932
14	16160001	16170000	25	0.00108912	0.000389206	2.79831	1.48456	0.604091	7.309
14	16170001	16180000	39	0.00225114	0.000593213	3.79483	1.92403	0.435419	5.68214
14	16180001	16190000	42	0.00190686	0.000574417	3.31964	1.73103	0.579387	5.523
14	16190001	16200000	19	0.000999931	0.000441323	2.26576	1.17999	0.508892	4.75352
14	16200001	16210000	42	0.00118332	0.00058945	2.0075	1.0054	0.442426	4.50719
14	16210001	16220000	27	0.0014575	0.000606374	2.40363	1.26522	0.332393	3.17952
14	16580001	16590000	16	0.00118818	0.000120899	9.82787	3.29688	0.391685	12.7575
14	16600001	16610000	15	0.00131331	0.000107143	12.2575	3.6156	0.465271	12.2333
14	16610001	16620000	10	0.000953212	0.00010291	9.26258	3.21141	0.531398	9.30021
14	16620001	16630000	12	0.00087555	0.000270639	3.23512	1.69382	0.36904	7.5969
14	16740001	16750000	11	0.00341432	0.000207413	16.4615	4.04102	0.399557	3.19929
14	17720001	17730000	28	0.000894324	0.000432035	2.07003	1.04965	0.40606	4.55154
14	23040001	23050000	14	0.000784931	0.000385206	2.03769	1.02694	0.465298	2.79674
14	26920001	26930000	57	0.00310102	0.00143929	2.15455	1.10739	0.389044	2.93261
14	33580001	33590000	35	0.00178651	0.000560333	3.1883	1.67279	0.518402	5.39115
14	33610001	33620000	13	0.000942294	0.0004307	2.18782	1.12949	0.437756	4.05584
14	33640001	33650000	24	0.000921223	0.000352944	2.61011	1.38411	0.467221	2.02043
14	34160001	34170000	21	0.00111969	0.000464834	2.4088	1.26831	0.370826	2.4641
14	40060001	40070000	19	0.00129152	0.000269342	4.79509	2.26156	0.333073	12.0721
14	40070001	40080000	48	0.00264346	0.000954856	2.76844	1.46907	0.349768	9.70405
14	40080001	40090000	53	0.00207637	0.00114009	1.82123	0.864916	0.460025	10.6479
14	40200001	40210000	20	0.000895986	0.000481766	1.8598	0.895144	0.389057	6.28255
14	40220001	40230000	27	0.0011681	0.000372518	3.13569	1.64878	0.501478	6.62266
14	40230001	40240000	39	0.0018009	0.000367262	4.90358	2.29384	0.396636	7.7625
14	40240001	40250000	50	0.00220868	0.000552729	3.99595	1.99854	0.447397	6.2012
14	40250001	40260000	28	0.00108431	0.000241015	4.49893	2.16958	0.364629	6.91004
14	40260001	40270000	20	0.000796561	0.000179372	4.44083	2.15083	0.41538	5.91661
14	40280001	40290000	23	0.000652087	0.00032859	1.9845	0.988776	0.60003	3.4549
14	46340001	46350000	17	0.00101155	0.0004098	2.4684	1.30358	0.456222	3.83064
14	47510001	47520000	15	0.000727417	0.000342881	2.12149	1.08507	0.338389	1.99131
14	51860001	51870000	23	0.00138129	0.000468545	2.94804	1.55976	0.359186	3.06037
14	62520001	62530000	16	0.00147067	0.000594503	2.47378	1.30672	0.389903	2.08627
14	67030001	67040000	18	0.00114568	0.000252652	4.53462	2.18098	0.403252	2.45832
14	94260001	94270000	84	0.00323577	0.00146958	2.20183	1.13871	0.413756	2.92121
15	650001	660000	28	0.00137182	0.000604266	2.27023	1.18284	0.541493	2.89978
15	2460001	2470000	27	0.00136251	0.000646077	2.1089	1.07649	0.469074	3.66298
15	6360001	6370000	13	0.000536156	0.000286243	1.87308	0.905412	0.545505	3.77924
15	23850001	23860000	44	0.00210109	0.000807729	2.60123	1.37919	0.439896	13.6527
15	23860001	23870000	39	0.00167499	0.000725213	2.30965	1.20768	0.33553	11.4812
15	23870001	23880000	15	0.00077383	0.000302406	2.55891	1.35553	0.394962	9.33667
15	31920001	31930000	13	0.000509998	0.000264286	1.92972	0.948392	0.340121	10.1064
15	31930001	31940000	13	0.000551715	0.000219315	2.51563	1.33092	0.439859	12.6163
15	32020001	32030000	10	0.000457504	0.000187309	2.44251	1.28836	0.471917	27.1321
15	32080001	32090000	22	0.000970748	0.000418013	2.32229	1.21555	0.354939	20.2524
15	32100001	32110000	14	0.000652766	0.000184392	3.5401	1.82379	0.488436	29.5019
15	32160001	32170000	18	0.00065257	0.000240476	2.71366	1.44024	0.572047	17.8227
15	32180001	32190000	14	0.00145162	0.000208733	6.95443	2.79793	0.498958	15.4146
15	32190001	32200000	22	0.000955785	0.000347095	2.75367	1.46136	0.385141	12.664
15	32200001	32210000	18	0.000862386	0.000240754	3.58202	1.84077	0.531648	10.3191
15	32230001	32240000	15	0.0011697	0.000181484	6.4452	2.68822	0.553929	15.9458
15	32380001	32390000	31	0.000803537	0.000414556	1.93831	0.954797	0.466752	7.94653
15	32620001	32630000	45	0.00206003	0.00113229	1.81935	0.863422	0.37441	2.27837
15	33970001	33980000	86	0.00340217	0.00164254	2.07129	1.05053	0.53613	7.39282
15	33980001	33990000	75	0.00455084	0.000928676	4.90035	2.29289	0.543203	12.4321
15	33990001	34000000	95	0.00515117	0.00162408	3.17175	1.66528	0.437264	12.6325
15	34000001	34010000	91	0.00438491	0.00183477	2.3899	1.25695	0.386461	10.5812
15	34020001	34030000	87	0.00361132	0.00163469	2.20918	1.14351	0.431829	7.46664
15	34030001	34040000	31	0.00215096	0.00041007	5.24535	2.39104	0.377362	7.49318
15	34050001	34060000	89	0.0060258	0.000756402	7.9664	2.99393	0.402495	5.94474
15	34060001	34070000	116	0.00758815	0.00117531	6.4563	2.69071	0.395546	7.71004
15	34080001	34090000	67	0.00475818	0.00181246	2.62526	1.39246	0.538324	5.76122
15	34090001	34100000	25	0.00471171	0.000656149	7.18085	2.84416	0.544271	4.12707
15	34100001	34110000	11	0.00251747	0.000260336	9.67008	3.27353	0.643834	3.4424
15	34410001	34420000	30	0.00126233	0.000692724	1.82227	0.865737	0.404168	2.57558
15	39760001	39770000	18	0.00238501	0.000518819	4.597	2.20069	0.446999	11.3226
15	39770001	39780000	11	0.000890286	0.000424633	2.0966	1.06805	0.478026	16.9989
15	39810001	39820000	12	0.000894691	0.000286251	3.12555	1.64411	0.556421	25.0475
15	39870001	39880000	17	0.00103033	0.00050873	2.0253	1.01813	0.356923	12.9638
15	39880001	39890000	10	0.000415219	0.000219577	1.89099	0.919146	0.612053	10.9665
15	39890001	39900000	10	0.000479925	0.0002463	1.94854	0.962392	0.607348	8.46218
15	40020001	40030000	19	0.00130711	0.000354517	3.68702	1.88245	0.557207	4.84044
15	40030001	40040000	38	0.0030528	0.00066986	4.55737	2.1882	0.483375	4.11312
15	46110001	46120000	62	0.00254105	0.00134511	1.8891	0.917701	0.357258	3.51368
15	46120001	46130000	30	0.00145861	0.000465445	3.1338	1.64791	0.375683	2.88162
15	46190001	46200000	12	0.000524352	0.000212963	2.46217	1.29993	0.45315	5.48261
15	46210001	46220000	10	0.00044182	0.000136512	3.23649	1.69443	0.403804	8.09473
15	46230001	46240000	24	0.000815857	0.000439184	1.85767	0.893491	0.511608	5.99169
15	58650001	58660000	78	0.00409321	0.00106536	3.84209	1.94189	0.568479	3.13123
15	58660001	58670000	55	0.00192021	0.000989989	1.93963	0.95578	0.571316	2.8468
15	58670001	58680000	29	0.00111789	0.000589732	1.89559	0.922647	0.442243	2.24269
15	60770001	60780000	25	0.00128605	0.000487621	2.6374	1.39911	0.365742	6.9137
15	81830001	81840000	20	0.00151703	0.000517489	2.93152	1.55165	0.513884	3.10741
15	81840001	81850000	27	0.00114319	0.000446345	2.56123	1.35683	0.481656	3.26317
16	21590001	21600000	31	0.00133025	0.000668857	1.98884	0.991928	0.424463	2.02874
16	22710001	22720000	16	0.000654612	0.000302394	2.16477	1.11421	0.498557	4.19579
16	22720001	22730000	44	0.00195168	0.000769958	2.53479	1.34186	0.408238	2.56034
16	22790001	22800000	32	0.00287571	0.000949551	3.02849	1.5986	0.453745	5.75505
16	22810001	22820000	64	0.00312466	0.00154912	2.01705	1.01225	0.352731	4.93487
16	22820001	22830000	18	0.000968722	0.000411658	2.35322	1.23464	0.504447	4.06268
16	27860001	27870000	22	0.000935236	0.000407937	2.2926	1.19698	0.369247	6.89116
16	27880001	27890000	20	0.000896715	0.000439424	2.04066	1.02904	0.35031	4.80828
16	27900001	27910000	13	0.000658806	0.000316422	2.08205	1.058	0.33593	4.18199
16	33540001	33550000	33	0.00281443	0.000667844	4.2142	2.07526	0.402915	3.60693
16	33550001	33560000	57	0.0045615	0.00103961	4.3877	2.13347	0.335261	2.51977
16	33760001	33770000	37	0.0013193	0.000727025	1.81466	0.859696	0.530774	3.99913
16	33780001	33790000	20	0.00116944	0.000386011	3.02955	1.5991	0.396597	3.32913
16	33790001	33800000	36	0.0017973	0.000660417	2.72146	1.44438	0.437943	3.29561
16	35890001	35900000	24	0.00148775	0.000237308	6.26928	2.6483	0.570046	2.46231
16	37550001	37560000	15	0.000601527	0.000332015	1.81175	0.857381	0.353396	9.45451
16	37800001	37810000	12	0.000833497	0.000232811	3.58014	1.84002	0.417259	6.82135
16	37810001	37820000	30	0.00136857	0.000666465	2.05348	1.03807	0.339393	6.32982
16	37870001	37880000	49	0.00237297	0.00058659	4.04536	2.01627	0.337276	3.27422
16	37900001	37910000	25	0.00128839	0.000541051	2.38127	1.25173	0.348206	12.1966
16	37920001	37930000	14	0.000702007	0.000354777	1.97873	0.984573	0.348783	13.9178
16	38070001	38080000	27	0.00130898	0.000479927	2.72746	1.44756	0.453077	7.08409
16	38080001	38090000	15	0.0010933	0.000274358	3.98494	1.99456	0.355168	7.79297
16	38090001	38100000	24	0.00097243	0.000504024	1.92933	0.948102	0.425574	7.41709
16	40080001	40090000	24	0.0011628	0.000404519	2.87453	1.52332	0.374301	5.2347
16	40420001	40430000	19	0.000677855	0.000365624	1.85397	0.890616	0.339103	4.3654
16	40860001	40870000	38	0.00129539	0.000523846	2.47285	1.30617	0.420347	3.85197
16	40870001	40880000	25	0.000981179	0.000283617	3.45952	1.79057	0.369724	4.86235
16	40880001	40890000	26	0.00062234	0.000260078	2.3929	1.25876	0.561991	2.79735
16	49600001	49610000	19	0.000703944	0.000361655	1.94645	0.960847	0.430256	12.6254
16	49610001	49620000	11	0.000542448	0.000144453	3.75519	1.90888	0.515711	10.5609
16	49790001	49800000	13	0.000624483	0.000284664	2.19375	1.1334	0.345751	5.93437
16	49810001	49820000	13	0.0014207	0.000363762	3.90558	1.96554	0.35178	4.97814
16	49820001	49830000	17	0.0013294	0.000474904	2.7993	1.48507	0.497434	4.74532
16	49830001	49840000	11	0.00106514	0.000293655	3.62718	1.85885	0.346607	3.46997
16	49840001	49850000	18	0.00200578	0.000588676	3.40727	1.76862	0.34325	2.55812
16	54470001	54480000	14	0.000519178	0.000257415	2.01689	1.01213	0.680078	5.52167
16	54830001	54840000	30	0.00100774	0.000420923	2.39412	1.2595	0.455496	2.38241
16	66470001	66480000	29	0.00131463	0.00069557	1.89	0.918389	0.421307	1.93871
16	75570001	75580000	20	0.00113482	0.000600281	1.89048	0.918754	0.337539	2.37295
16	76020001	76030000	38	0.00207046	0.00109953	1.88304	0.913064	0.417561	3.09396
16	79040001	79050000	23	0.000982307	0.000409817	2.39694	1.26119	0.544325	5.95155
16	79050001	79060000	21	0.000857661	0.000316154	2.7128	1.43978	0.641933	7.60397
16	79060001	79070000	48	0.00237424	0.00080935	2.93351	1.55263	0.433176	5.69868
16	79080001	79090000	16	0.00106134	0.000316138	3.3572	1.74726	0.367808	7.46623
16	79090001	79100000	22	0.00141001	0.000671054	2.10119	1.0712	0.487161	6.38036
16	79100001	79110000	31	0.0019186	0.00104449	1.83688	0.877255	0.341665	5.19472
16	79110001	79120000	18	0.00134328	0.000614038	2.18762	1.12936	0.397767	4.76996
16	79120001	79130000	21	0.00202883	0.000705331	2.87642	1.52428	0.348717	2.97269
16	79180001	79190000	38	0.00252712	0.00073023	3.46072	1.79107	0.461492	3.53261
16	79190001	79200000	27	0.00145091	0.000655354	2.21393	1.14661	0.439059	3.85326
16	79230001	79240000	16	0.00113643	0.000473853	2.39828	1.262	0.442553	2.32333
17	760001	770000	48	0.00224344	0.00106953	2.09759	1.06874	0.38655	3.41236
17	1930001	1940000	20	0.000775893	0.000366956	2.1144	1.08025	0.344629	2.21391
17	16850001	16860000	10	0.000984189	0.000261918	3.75762	1.90982	0.341637	9.00032
17	17950001	17960000	41	0.00156099	0.000707467	2.20645	1.14173	0.345238	4.94496
17	17980001	17990000	16	0.000934958	0.000198154	4.71834	2.23828	0.334993	18.468
17	17990001	18000000	18	0.000821571	0.000239421	3.43149	1.77884	0.499172	15.5601
17	18030001	18040000	16	0.00083482	0.000178309	4.68187	2.22709	0.51169	10.6051
17	19870001	19880000	69	0.00212345	0.00115603	1.83685	0.877231	0.569049	6.84098
17	20340001	20350000	19	0.00113695	0.000368549	3.08494	1.62524	0.451189	4.51519
17	20350001	20360000	15	0.000856066	0.000221176	3.87052	1.95253	0.39408	4.15818
17	20360001	20370000	17	0.00112523	0.000391286	2.87572	1.52392	0.463602	3.19826
17	20370001	20380000	14	0.00100941	0.000362709	2.78297	1.47663	0.375802	2.09799
17	25540001	25550000	19	0.00382167	0.00067361	5.67342	2.50422	0.501842	2.17428
17	37520001	37530000	12	0.000675171	0.000294453	2.29297	1.19722	0.551372	3.49392
17	50070001	50080000	26	0.00120447	0.000616232	1.95457	0.966853	0.342057	5.03438
17	52470001	52480000	20	0.000979022	0.00039181	2.49872	1.32119	0.340062	2.3384
17	56800001	56810000	192	0.0101643	0.00348378	2.91761	1.54479	0.370635	4.36975
17	56810001	56820000	97	0.00545965	0.00112183	4.86674	2.28295	0.573651	5.11685
17	56820001	56830000	68	0.00418622	0.000593817	7.04968	2.81756	0.651506	4.16042
17	61620001	61630000	13	0.000509185	0.000220644	2.30772	1.20647	0.469229	2.8603
17	65800001	65810000	43	0.00279141	0.000691592	4.03621	2.013	0.46291	4.13834
17	66680001	66690000	53	0.00211564	0.000972595	2.17525	1.12118	0.371556	4.58653
17	66710001	66720000	70	0.00283696	0.00100723	2.8166	1.49395	0.59335	4.05795
17	66720001	66730000	39	0.001525	0.000578349	2.63682	1.3988	0.478616	4.50234
17	66730001	66740000	16	0.00107354	0.000464828	2.30954	1.20761	0.402881	3.38048
17	66840001	66850000	22	0.00139919	0.000266685	5.2466	2.39138	0.480093	8.39428
17	66850001	66860000	21	0.00276761	0.000308474	8.97194	3.16542	0.569769	5.41607
17	66870001	66880000	52	0.00218069	0.00106366	2.05018	1.03575	0.346924	2.9074
17	66880001	66890000	44	0.00220804	0.000857851	2.57392	1.36397	0.525063	2.75967
18	15980001	15990000	15	0.000675758	0.000225932	2.99098	1.58062	0.462994	15.1796
18	16000001	16010000	15	0.000743151	0.000351862	2.11205	1.07865	0.444079	13.7229
18	16020001	16030000	14	0.000611875	0.000312443	1.95836	0.969644	0.438604	10.0186
18	16050001	16060000	23	0.000923837	0.000249217	3.70696	1.89024	0.730792	7.72845
18	16060001	16070000	11	0.000535473	0.000133335	4.016	2.00576	0.482552	6.70097
18	16080001	16090000	18	0.00120794	0.000188894	6.3948	2.6769	0.54652	11.1986
18	16090001	16100000	23	0.00119511	0.000164286	7.27457	2.86286	0.548658	7.50747
18	24870001	24880000	22	0.000879152	0.000461666	1.9043	0.929263	0.450238	5.71577
18	24890001	24900000	53	0.00333009	0.0011737	2.83726	1.5045	0.445667	4.29239
18	24920001	24930000	28	0.0020615	0.000561663	3.67035	1.87592	0.342771	2.34027
18	26140001	26150000	24	0.00118372	0.000469067	2.52356	1.33546	0.382001	14.253
18	26160001	26170000	21	0.00111816	0.000424351	2.63499	1.3978	0.423668	14.0693
18	36210001	36220000	10	0.000671435	0.000204244	3.28742	1.71695	0.464595	2.21374
18	36240001	36250000	12	0.000618984	0.000233079	2.65568	1.40908	0.354274	6.27941
18	36940001	36950000	11	0.000717797	0.000328042	2.18813	1.1297	0.439553	13.8328
18	36950001	36960000	15	0.000747327	0.000379106	1.97129	0.979138	0.351177	12.0581
18	36970001	36980000	10	0.000586671	0.000315084	1.86195	0.896815	0.339915	9.80435
18	37020001	37030000	10	0.000271228	8.20155e-05	3.30703	1.72554	0.75708	8.94728
18	37210001	37220000	17	0.00115459	0.000390482	2.95683	1.56405	0.374165	6.63358
18	37410001	37420000	17	0.00115409	0.000352395	3.27499	1.71149	0.34621	2.81665
18	37450001	37460000	20	0.00165446	0.000467511	3.53887	1.82329	0.356959	2.55063
18	37490001	37500000	10	0.000581909	0.000170115	3.42068	1.77428	0.429095	5.96448
18	37600001	37610000	11	0.000444603	0.000180169	2.4677	1.30317	0.459981	8.91582
18	37630001	37640000	18	0.00105895	0.000154241	6.86555	2.77938	0.483045	12.7909
18	46080001	46090000	49	0.00283237	0.00143286	1.97672	0.983112	0.338367	2.05239
18	49070001	49080000	13	0.000749314	0.000204497	3.66418	1.87349	0.567126	4.18873
18	50920001	50930000	16	0.000537186	0.000294197	1.82594	0.868639	0.360757	2.59179
18	56850001	56860000	18	0.000837105	0.000288376	2.90282	1.53746	0.368704	2.39248
18	56910001	56920000	24	0.000774528	0.000416678	1.85882	0.894384	0.349527	2.22575
18	57020001	57030000	19	0.00073498	0.000402404	1.82647	0.86906	0.379614	8.39632
18	59250001	59260000	66	0.00449641	0.00101034	4.45039	2.15393	0.344397	3.64874
18	62190001	62200000	28	0.002656	0.00070676	3.75799	1.90996	0.397836	2.46054
18	62200001	62210000	22	0.00283492	0.00038801	7.30631	2.86914	0.397291	2.67073
19	13680001	13690000	54	0.00319695	0.0013111	2.43837	1.28592	0.447606	3.50963
19	20430001	20440000	11	0.000500654	0.00024473	2.04574	1.03262	0.442346	3.98664
19	20630001	20640000	10	0.000570298	0.000119054	4.79025	2.2601	0.5368	3.07381
19	22980001	22990000	14	0.000612804	0.000271736	2.25514	1.17322	0.347091	4.33222
19	26750001	26760000	11	0.000588655	0.000243651	2.41598	1.27261	0.409993	3.51585
19	26770001	26780000	12	0.000433021	0.000233616	1.85356	0.890298	0.377011	2.92441
19	34990001	35000000	17	0.0011325	0.000406901	2.78323	1.47676	0.337876	3.25988
19	35240001	35250000	40	0.00194233	0.000739816	2.62542	1.39255	0.582113	8.97214
19	35290001	35300000	14	0.000528127	0.000208733	2.53016	1.33923	0.560395	10.9279
19	35300001	35310000	16	0.000531142	0.000252652	2.10227	1.07195	0.559573	10.1359
19	35310001	35320000	16	0.000590615	0.000222761	2.65134	1.40672	0.646409	7.31324
19	37300001	37310000	25	0.00146552	0.000555843	2.63657	1.39866	0.334164	2.29816
19	45820001	45830000	37	0.00165664	0.000746621	2.21885	1.14981	0.367818	9.46569
19	45830001	45840000	36	0.00156233	0.000736824	2.12036	1.08431	0.370064	10.3534
19	45850001	45860000	26	0.000764319	0.00040559	1.88446	0.914153	0.391734	7.74143
19	45870001	45880000	32	0.00108576	0.00058707	1.84946	0.887101	0.381518	5.14334
19	45890001	45900000	14	0.000679272	0.000256106	2.65231	1.40725	0.458207	2.23694
19	45900001	45910000	24	0.00112678	0.000335459	3.35892	1.748	0.348297	2.16684
19	49440001	49450000	19	0.000894758	0.000377783	2.36844	1.24394	0.346676	3.50936
20	3330001	3340000	24	0.00101123	0.000508787	1.98753	0.990977	0.48843	8.5785
20	4950001	4960000	57	0.00281428	0.0011161	2.52153	1.3343	0.337118	2.40122
20	6270001	6280000	41	0.00286721	0.000778182	3.6845	1.88147	0.349521	3.9088
20	6280001	6290000	13	0.00254117	9.18015e-05	27.6811	4.79083	0.51036	6.49858
20	11480001	11490000	23	0.0017664	0.000427255	4.1343	2.04764	0.336816	3.74348
20	25530001	25540000	17	0.000810584	0.00037355	2.16995	1.11766	0.512271	5.12154
20	25540001	25550000	33	0.0013121	0.000621234	2.11209	1.07867	0.639309	2.77233
20	26310001	26320000	39	0.0019359	0.000777876	2.4887	1.31539	0.428363	3.34245
20	27300001	27310000	68	0.00274849	0.00120847	2.27436	1.18546	0.339155	2.47104
20	27310001	27320000	100	0.00459228	0.00133265	3.44598	1.78491	0.339039	2.4986
20	27320001	27330000	79	0.00355591	0.0013895	2.55913	1.35565	0.397577	1.95509
20	31830001	31840000	19	0.000779021	0.000401339	1.94105	0.956841	0.376135	1.94391
20	32020001	32030000	12	0.00060709	0.00027302	2.22361	1.1529	0.36511	2.13926
20	40850001	40860000	38	0.00164097	0.000863035	1.90139	0.927058	0.486598	11.272
20	40930001	40940000	13	0.000834394	0.000268014	3.11325	1.63842	0.35548	2.55556
20	60220001	60230000	38	0.00172252	0.000817541	2.10695	1.07516	0.414997	7.49871
20	60240001	60250000	85	0.00327578	0.00165475	1.97962	0.985225	0.38326	4.58251
20	60250001	60260000	53	0.00340648	0.00116753	2.91768	1.54482	0.392103	3.90932
20	60260001	60270000	34	0.00191206	0.000515656	3.70801	1.89065	0.430829	3.28216
20	70940001	70950000	62	0.00280527	0.00118733	2.36267	1.24042	0.348953	2.63593
21	3580001	3590000	41	0.0015081	0.00077727	1.94025	0.956244	0.375918	1.92861
21	3590001	3600000	36	0.00111305	0.00055901	1.99111	0.993572	0.369051	4.76561
21	45100001	45110000	12	0.000509766	0.000230698	2.20967	1.14383	0.494009	3.50832
21	45110001	45120000	23	0.00106604	0.000554287	1.92326	0.943556	0.465164	1.9752
21	54240001	54250000	52	0.00214652	0.00117191	1.83164	0.873138	0.368639	6.99389
21	59080001	59090000	34	0.00179976	0.000845045	2.12978	1.0907	0.396796	9.8421
21	59110001	59120000	26	0.00126286	0.000490761	2.57327	1.3636	0.525965	7.83012
21	59120001	59130000	35	0.00129478	0.000381492	3.39399	1.76298	0.446224	5.91884
21	59150001	59160000	34	0.00202572	0.000572791	3.53658	1.82235	0.40037	2.65963
21	63420001	63430000	19	0.00148325	0.000251084	5.90739	2.56252	0.350178	2.67317
21	64280001	64290000	80	0.00351488	0.00133046	2.64185	1.40155	0.343533	3.06697
21	64300001	64310000	37	0.0012565	0.00063336	1.98386	0.988313	0.351375	2.32493
21	64470001	64480000	23	0.0013011	0.00051909	2.5065	1.32568	0.405723	3.44607
22	2870001	2880000	16	0.00192758	0.000370905	5.19696	2.37767	0.339573	2.60166
22	2880001	2890000	41	0.00192999	0.000729945	2.64402	1.40273	0.600586	4.1898
22	2890001	2900000	30	0.00164694	0.000523582	3.14552	1.6533	0.472531	2.68965
22	16230001	16240000	13	0.000536828	0.000293134	1.83134	0.8729	0.552478	13.6646
22	16280001	16290000	34	0.00130957	0.000669396	1.95635	0.968161	0.432961	6.90401
22	16290001	16300000	40	0.00174219	0.000726849	2.39691	1.26117	0.442332	5.03029
22	16300001	16310000	40	0.00172646	0.000763534	2.26114	1.17705	0.427088	3.66416
22	28980001	28990000	22	0.000914346	0.000452387	2.02116	1.01518	0.410786	1.98159
22	28990001	29000000	13	0.000721849	0.000167205	4.31715	2.11008	0.399137	3.46855
22	29040001	29050000	14	0.000554181	0.000261916	2.11587	1.08125	0.406741	2.6169
22	31510001	31520000	17	0.00180178	0.000455051	3.95951	1.98532	0.394993	3.95079
22	31860001	31870000	17	0.00096379	0.000491562	1.96067	0.971345	0.339906	4.33087
22	31870001	31880000	43	0.00179376	0.000770942	2.32671	1.21829	0.381503	3.72229
22	38070001	38080000	71	0.00336655	0.00184064	1.82901	0.871063	0.36158	2.01222
22	45340001	45350000	19	0.00152851	0.00039763	3.84405	1.94263	0.350604	2.75953
22	47220001	47230000	22	0.00153788	0.000415648	3.69996	1.88751	0.430095	4.72311
22	51630001	51640000	28	0.00108018	0.000484141	2.23113	1.15777	0.459999	3.43914
22	51640001	51650000	36	0.00156385	0.00068442	2.28493	1.19215	0.447788	3.24336
22	51690001	51700000	45	0.00176793	0.000806625	2.19176	1.13209	0.464475	4.6399
22	51710001	51720000	23	0.00170011	0.00073315	2.31891	1.21345	0.417406	5.49748
22	53130001	53140000	87	0.00304949	0.00153514	1.98646	0.990198	0.484681	4.36678
22	53150001	53160000	57	0.0018904	0.000994559	1.90074	0.926563	0.564798	3.11562
22	53300001	53310000	33	0.00144957	0.000432046	3.35513	1.74637	0.359574	2.87922
23	6430001	6440000	17	0.00145139	0.000515121	2.81757	1.49445	0.445262	2.70491
23	8720001	8730000	11	0.000753926	0.000387053	1.94786	0.961892	0.502963	1.96942
23	8770001	8780000	12	0.000614994	0.000182013	3.37885	1.75653	0.588076	14.9938
23	8780001	8790000	14	0.000949672	0.000237037	4.00643	2.00232	0.574776	12.4246
23	8800001	8810000	11	0.000641207	0.000166936	3.84103	1.9415	0.475867	10.2813
23	8810001	8820000	13	0.00070502	0.000219054	3.21848	1.68638	0.596615	9.14426
23	8850001	8860000	13	0.000697852	0.000222222	3.14034	1.65092	0.518775	9.06151
23	16720001	16730000	19	0.00204577	0.000526205	3.88778	1.95895	0.45435	2.05687
23	21130001	21140000	64	0.00319214	0.00124114	2.57194	1.36286	0.393242	2.8561
23	30220001	30230000	13	0.000661494	0.000296572	2.23047	1.15735	0.413822	2.73564
23	30310001	30320000	37	0.0016097	0.00086757	1.85541	0.89174	0.333063	3.00489
23	30520001	30530000	11	0.00160567	0.000406901	3.94609	1.98043	0.447049	2.54701
23	33030001	33040000	33	0.00123345	0.000580208	2.12588	1.08806	0.357435	5.8358
23	33080001	33090000	14	0.000552533	0.000252649	2.18696	1.12893	0.437394	9.59815
23	33100001	33110000	23	0.000777779	0.000418801	1.85716	0.893095	0.612529	5.92347
23	39230001	39240000	35	0.00116263	0.000542653	2.14249	1.09929	0.49321	7.32154
23	39240001	39250000	11	0.000574729	0.000183346	3.13467	1.64831	0.531509	5.23084
23	39250001	39260000	21	0.000751269	0.000390228	1.92521	0.945012	0.487431	4.37024
23	40120001	40130000	30	0.00154261	0.00038681	3.98803	1.99568	0.490164	3.02015
24	25950001	25960000	36	0.00139774	0.000618066	2.26147	1.17726	0.46242	13.3915
24	25960001	25970000	21	0.000789983	0.000194185	4.0682	2.02439	0.538557	23.4589
24	25970001	25980000	14	0.000535439	0.000130956	4.08869	2.03164	0.634237	19.8447
24	25980001	25990000	28	0.0020159	0.000372777	5.40779	2.43504	0.640518	16.828
24	25990001	26000000	17	0.00154704	0.000214298	7.21911	2.85182	0.394074	16.4243
24	26000001	26010000	13	0.000753926	0.000195252	3.8613	1.94909	0.588774	14.7237
24	26010001	26020000	14	0.000924094	0.000196843	4.69457	2.23099	0.612078	10.6885
24	26040001	26050000	46	0.00170829	0.000526815	3.24268	1.69718	0.628765	9.40928
24	26050001	26060000	34	0.001198	0.000519856	2.30448	1.20444	0.443225	6.53723
24	26510001	26520000	30	0.00131219	0.000622556	2.10775	1.0757	0.344453	3.1721
24	26520001	26530000	10	0.000605813	0.000116138	5.21632	2.38303	0.434844	2.69338
24	33330001	33340000	64	0.00305358	0.000919427	3.32118	1.73169	0.394563	2.13095
24	42370001	42380000	31	0.00137554	0.000611937	2.24785	1.16854	0.405284	3.13404
24	43800001	43810000	10	0.000363203	0.000193918	1.87297	0.905329	0.368057	12.032
24	43890001	43900000	19	0.00104918	0.000335734	3.12503	1.64387	0.490109	6.91341
24	43900001	43910000	13	0.000777599	0.000221973	3.50312	1.80864	0.612631	4.62332
24	52680001	52690000	65	0.00397182	0.00196445	2.02185	1.01567	0.38702	1.93043
24	52690001	52700000	24	0.00336708	0.000687633	4.89662	2.29179	0.337562	2.64937
24	52800001	52810000	47	0.00179255	0.000794478	2.25626	1.17393	0.355407	2.62598
24	56180001	56190000	24	0.00146872	0.000692612	2.12055	1.08444	0.410375	3.41622
24	56190001	56200000	27	0.00131357	0.000680736	1.92963	0.948326	0.383313	4.43684
24	57310001	57320000	15	0.00111062	0.000388916	2.85568	1.51383	0.459506	3.72029
24	57320001	57330000	16	0.000740931	0.000178307	4.15537	2.05498	0.415487	3.68264
24	57330001	57340000	12	0.000679132	0.000302381	2.24595	1.16732	0.497533	2.05906
24	59370001	59380000	74	0.00304853	0.00142516	2.13908	1.09699	0.369268	2.04735
24	62180001	62190000	141	0.00646963	0.00287096	2.25347	1.17215	0.432891	5.49753
24	62200001	62210000	39	0.00189455	0.000913426	2.07411	1.0525	0.340862	2.93036
24	62210001	62220000	65	0.00308323	0.00149311	2.06497	1.04612	0.356937	2.3629
24	62220001	62230000	69	0.00324654	0.00173495	1.87126	0.904009	0.466454	2.80534
24	62230001	62240000	25	0.00123706	0.000617998	2.00172	1.00124	0.489974	4.03286
24	62240001	62250000	46	0.0023502	0.000958096	2.45299	1.29454	0.496818	2.26824
25	150001	160000	15	0.000898247	0.000388365	2.31289	1.2097	0.417661	16.4178
25	180001	190000	10	0.000928881	0.000207681	4.47263	2.16112	0.393101	15.2487
25	190001	200000	16	0.00101038	0.000417725	2.41877	1.27427	0.429162	13.7366
25	200001	210000	19	0.00104212	0.000301344	3.45824	1.79004	0.449223	12.3399
25	210001	220000	21	0.00125055	0.000306891	4.0749	2.02676	0.500626	10.811
25	220001	230000	17	0.0010225	0.000257407	3.97231	1.98998	0.582184	9.56304
25	230001	240000	23	0.000867555	0.000477797	1.81574	0.860557	0.6072	6.86376
25	260001	270000	23	0.00106708	0.000563788	1.8927	0.920444	0.586147	6.32159
25	270001	280000	24	0.00125194	0.000381757	3.27942	1.71344	0.550976	8.40648
25	290001	300000	13	0.000404223	0.000198945	2.03183	1.02278	0.580314	5.72218
25	300001	310000	10	0.000497852	0.000151587	3.28427	1.71557	0.529563	3.15483
25	1160001	1170000	25	0.00205586	0.000506621	4.05798	2.02076	0.47836	3.26248
25	3410001	3420000	22	0.000903953	0.000478849	1.88776	0.916677	0.380723	7.53995
25	3420001	3430000	15	0.000759167	0.000246032	3.08564	1.62557	0.357011	6.98029
25	3650001	3660000	12	0.00080051	0.000234921	3.40757	1.76874	0.547089	7.95203
25	3660001	3670000	14	0.000736433	0.00024419	3.01582	1.59255	0.515728	7.37321
25	3680001	3690000	23	0.00126073	0.00068761	1.8335	0.874597	0.526963	3.60928
25	3700001	3710000	26	0.000981743	0.000419312	2.34132	1.22732	0.374351	7.11914
25	3720001	3730000	22	0.000967945	0.000427796	2.26263	1.178	0.460224	3.56365
25	3840001	3850000	10	0.000397452	0.000211908	1.87559	0.907343	0.354721	10.4718
25	3860001	3870000	21	0.000904971	0.000323545	2.79705	1.48391	0.429436	4.79611
25	3870001	3880000	20	0.000992147	0.000349211	2.84111	1.50645	0.515643	2.519
25	25930001	25940000	25	0.000872664	0.000309801	2.81685	1.49408	0.497292	10.5672
25	25950001	25960000	32	0.00106328	0.000368554	2.885	1.52857	0.533125	10.08
25	25960001	25970000	23	0.000889821	0.000404503	2.19979	1.13736	0.489439	7.73203
25	25970001	25980000	14	0.00062187	0.000202651	3.06867	1.61762	0.540862	5.5039
25	25980001	25990000	24	0.00123434	0.000271455	4.54713	2.18495	0.465114	3.48185
25	26790001	26800000	10	0.000518612	0.000205556	2.52297	1.33512	0.623581	2.08688
25	35510001	35520000	13	0.00068381	0.00035823	1.90886	0.932709	0.365726	2.22432
25	36820001	36830000	27	0.00145555	0.00069658	2.08957	1.0632	0.39619	1.93326
26	18320001	18330000	22	0.00123847	0.0003889	3.18455	1.67109	0.360007	2.57779
26	26210001	26220000	40	0.0015296	0.000844504	1.81124	0.856978	0.3322	3.08821
26	29110001	29120000	10	0.00046169	0.00022963	2.01058	1.00761	0.380786	2.29185
26	32420001	32430000	34	0.00130222	0.000660874	1.97045	0.978526	0.38249	2.80398
26	33560001	33570000	71	0.00226871	0.00100759	2.25162	1.17096	0.398805	3.9446
26	41600001	41610000	30	0.00134549	0.000668537	2.01259	1.00905	0.517698	2.01351
26	41810001	41820000	47	0.00229726	0.000939231	2.44589	1.29036	0.350374	5.44184
26	41920001	41930000	17	0.000643438	0.000312447	2.05935	1.04219	0.4185	9.09304
26	41940001	41950000	36	0.00132284	0.000584424	2.26349	1.17855	0.528733	11.8369
26	41950001	41960000	17	0.00124714	0.000351078	3.55232	1.82876	0.45668	10.574
26	41960001	41970000	45	0.00187109	0.000792171	2.36198	1.24	0.607948	8.38234
26	41980001	41990000	15	0.000837415	0.000253718	3.30057	1.72272	0.507569	12.6496
26	41990001	42000000	18	0.00241084	0.000221438	10.8872	3.44456	0.447698	12.5988
26	42000001	42010000	26	0.00214575	0.000292857	7.32695	2.87321	0.455273	12.1788
26	42010001	42020000	67	0.00340738	0.00083766	4.06774	2.02423	0.377423	8.79996
26	42020001	42030000	36	0.00136807	0.000646905	2.11479	1.08052	0.480611	9.21912
26	42030001	42040000	23	0.00141551	0.000441307	3.20754	1.68147	0.546369	13.3256
26	42050001	42060000	31	0.00166767	0.000560333	2.97621	1.57348	0.562423	9.79251
26	42090001	42100000	110	0.00528276	0.00227392	2.3232	1.21611	0.369649	3.80694
26	42100001	42110000	60	0.00303409	0.00127025	2.38858	1.25615	0.490291	2.25478
26	42120001	42130000	86	0.00281018	0.00138973	2.02211	1.01586	0.466131	5.75278
26	42130001	42140000	48	0.00175299	0.000572086	3.06421	1.61551	0.472202	5.05104
27	4250001	4260000	38	0.0024587	0.000971548	2.5307	1.33954	0.3636	2.97847
27	4300001	4310000	61	0.00238834	0.000859882	2.77752	1.4738	0.529835	4.04338
27	4320001	4330000	29	0.00183218	0.000302658	6.05363	2.5978	0.372375	3.57595
27	4330001	4340000	22	0.00171612	0.000460866	3.72369	1.89673	0.391764	3.11694
27	4530001	4540000	26	0.00214654	0.000728367	2.94706	1.55928	0.44915	4.7317
27	31540001	31550000	21	0.000924957	0.00047968	1.92828	0.947314	0.36469	2.75543
27	31550001	31560000	24	0.00112358	0.000460317	2.44088	1.2874	0.378253	2.84977
27	37340001	37350000	14	0.000883649	0.000353993	2.49623	1.31975	0.362386	2.13716
27	37350001	37360000	14	0.000754725	0.000408483	1.84763	0.885675	0.367929	2.65368
28	3490001	3500000	14	0.000511531	0.000216144	2.36662	1.24283	0.350354	4.6444
28	3500001	3510000	25	0.00116491	0.000309264	3.76672	1.91331	0.413734	5.12322
28	19660001	19670000	59	0.00274318	0.000891621	3.07662	1.62135	0.347465	9.00044
28	19750001	19760000	41	0.00195743	0.000801952	2.44083	1.28737	0.435585	2.06873
28	36210001	36220000	77	0.00349761	0.00128622	2.71929	1.44323	0.40024	1.9525
29	5610001	5620000	10	0.00358839	0.000216144	16.6018	4.05327	0.36887	2.20054
29	19370001	19380000	48	0.00662814	0.00088889	7.45665	2.89853	0.363607	3.3401
29	19380001	19390000	52	0.00198823	0.000861447	2.30801	1.20665	0.389156	2.62148
29	19390001	19400000	55	0.00231926	0.00112366	2.06402	1.04546	0.369177	1.92757
29	39600001	39610000	12	0.000642195	0.000294274	2.1823	1.12585	0.401382	11.1323
29	39620001	39630000	10	0.000819602	0.000436027	1.8797	0.910506	0.435965	11.6074
29	41300001	41310000	27	0.00153348	0.000683343	2.24409	1.16613	0.555201	2.10013
29	42100001	42110000	78	0.00320385	0.00140235	2.28463	1.19196	0.401247	2.16422
29	42110001	42120000	30	0.00195968	0.00060191	3.25577	1.703	0.449855	2.04427
29	47950001	47960000	30	0.00120061	0.000539176	2.22675	1.15494	0.544759	2.43326
