# Supplementary material for: Comparative genome analyses reveal the unique genetic composition and selection signals underlying the phenotypic characteristics of three Chinese domestic goat breeds
Source: Genet Sel Evol. 2019 Nov 26;51:70. doi: 10.1186/s12711-019-0512-4 (PMC6880376; doi:10.1186/s12711-019-0512-4)
Supplement: Supplementary file 11 — Additional file 11: Table S7. Summary of the positively selected genes identified in three Chinese goat breeds (CB, JT, and TC). [file 12711_2019_512_MOESM11_ESM.xlsx]

## Sheet: List
Table S7 Summary of the positively selected genes identified in three Chinese goat breeds
Table S7-1 Summary of the positively selected genes identified in Chengdu Brown goats
Table S7-2 Summary of the positively selected genes identified in Jintang Black goats
Table S7-3 Summary of the positively selected genes identified in Tibetan Cashmere goats (CB, JT, and TC)

## Sheet: S7-1
Table S7-1 Summary of the positively selected genes identified in Chengdu Brown goats
Chr	Starting position	Ending position	Gene ID	Gene name
1	21415915	21513982	ENSCHIG00000014010	LOC102181811
1	34233100	34252816	ENSCHIG00000026743	POU1F1
1	41697847	41763164	ENSCHIG00000020464	MRPS6
1	42887433	42968605	ENSCHIG00000026066	DCBLD2
1	42823244	42884827	ENSCHIG00000013422	ST3GAL6
1	43892242	44200833	ENSCHIG00000005420	FILIP1L
1	68273170	68903344	ENSCHIG00000008445	KALRN
1	69106935	69131381	ENSCHIG00000002626	MUC13
1	69885369	69933388	ENSCHIG00000017400	LMLN
1	71801493	71814121	ENSCHIG00000016486	APOD
1	79706386	79772959	ENSCHIG00000016667	MASP1
1	93875634	94142339	ENSCHIG00000023395	SPATA16
1	112873265	112956832	ENSCHIG00000005003	GPR149
1	113021353	113160746	ENSCHIG00000012613	ARHGEF26
1	113413323	113413620	ENSCHIG00000006296	RF00017
1	114393046	114393152	ENSCHIG00000004538	RF00026
1	118063117	118209890	ENSCHIG00000017264	WWTR1
1	124628922	125281842	ENSCHIG00000013168	SLC9A9
1	130403677	130506546	ENSCHIG00000001594	ARMC8
2	13849470	13931688	ENSCHIG00000006222
2	13889948	13943039	ENSCHIG00000023822	COL16A1
2	14684276	14693378	ENSCHIG00000011334	ZBTB8A
2	17090224	17188985	ENSCHIG00000024432	CAB39
2	44446740	44575154	ENSCHIG00000000921	NBEAL1
2	44565327	44566117	ENSCHIG00000016764
2	44715988	44771721	ENSCHIG00000013077	ICA1L
2	65936344	66135732	ENSCHIG00000000584
2	132310652	132347616	ENSCHIG00000016130	HS6ST1
2	135224381	135232547	ENSCHIG00000027227	IMP4
2	135231457	135234255	ENSCHIG00000015512	CCDC115
3	6799838	6821718	ENSCHIG00000008217
3	7060524	7080574	ENSCHIG00000021100	SPP2
3	7571227	7571318	ENSCHIG00000003388	RF00614
3	7546441	7626382	ENSCHIG00000023695	USP40
3	15598579	15624746	ENSCHIG00000026631	CTPS1
3	15628255	15633731	ENSCHIG00000015962	SLFNL1
3	15637813	15767373	ENSCHIG00000024918	SCMH1
3	15982763	16003654	ENSCHIG00000018218	FOXO6
3	18946110	18946431	ENSCHIG00000027211
3	18936276	18945558	ENSCHIG00000022071	DMAP1
3	18946447	19078364	ENSCHIG00000024241	ERI3
3	40200830	40344804	ENSCHIG00000005514	RAVER2
3	40331713	40332349	ENSCHIG00000022704
3	40348157	40481038	ENSCHIG00000012708	JAK1
3	53828535	54160156	ENSCHIG00000025470	AK5
3	54556148	54656177	ENSCHIG00000023418	GIPC2
3	55187651	55206452	ENSCHIG00000012676	IFI44
3	62927671	63324589	ENSCHIG00000020640	COL24A1
3	63388252	63400543	ENSCHIG00000006870
3	79015149	79240961	ENSCHIG00000008401	OLFM3
3	79996634	80226527	ENSCHIG00000012424	COL11A1
3	87128893	87168110	ENSCHIG00000023186	AHCYL1
3	87179697	87197469	ENSCHIG00000012301	STRIP1
3	90876579	90923650	ENSCHIG00000016393	PHTF1
3	94700048	94852253	ENSCHIG00000013056	MAN1A2
3	101050287	101053337	ENSCHIG00000012675
3	100985681	101067870	ENSCHIG00000021069	SNX27
3	101187747	101198163	ENSCHIG00000005408	RORC
4	852758	858703	ENSCHIG00000007193
4	547411	1168100	ENSCHIG00000018892	PTPRN2
4	1145572	1145658	ENSCHIG00000001429	MIR153-2
4	1309557	1426120	ENSCHIG00000014768	UBE3C
4	1526630	1539457	ENSCHIG00000020102	NOM1
4	1584540	1730510	ENSCHIG00000014826	LMBR1
4	2380159	2386366	ENSCHIG00000007210
4	2387739	2400479	ENSCHIG00000023555	SHH
4	2423922	2521998	ENSCHIG00000012513	RBM33
4	2880147	2895756	ENSCHIG00000011892	HTR5A
4	16228268	16385154	ENSCHIG00000018376	BRAF
4	24951871	25309188	ENSCHIG00000023032	MKLN1
4	49196091	49386686	ENSCHIG00000017106	OSBPL3
4	51909661	52239079	ENSCHIG00000000484	JAZF1
4	72629068	72787210	ENSCHIG00000007442
4	97265344	98142244	ENSCHIG00000020976	DGKB
4	112962167	113349953	ENSCHIG00000020126	ABCA13
5	15529752	15799526	ENSCHIG00000026547	MGAT4C
5	33399454	33409510	ENSCHIG00000010302	SLC38A2
5	48924036	49075435	ENSCHIG00000013017	SRGAP1
5	59425245	59760839	ENSCHIG00000025886	CFAP54
5	64621561	64687303	ENSCHIG00000023012	PARPBP
5	68313086	68326195	ENSCHIG00000019667	CKAP4
5	68352314	68397007	ENSCHIG00000014442	TCP11L2
5	68406778	68520690	ENSCHIG00000015728	POLR3B
5	68567436	68740232	ENSCHIG00000022571	RFX4
5	87721195	87862652	ENSCHIG00000025590	PDE3A
6	31264405	32061227	ENSCHIG00000020528	GRID2
6	60794237	61155969	ENSCHIG00000017113	LIMCH1
6	61429236	61506775	ENSCHIG00000006762	SLC30A9
6	61540995	61566126	ENSCHIG00000007396
6	61627753	61733388	ENSCHIG00000007397
6	63815015	63846500	ENSCHIG00000017840	YIPF7
6	63862981	63885266	ENSCHIG00000010231	GUF1
6	63889568	63915946	ENSCHIG00000022756	GNPDA2
6	65347187	65518607	ENSCHIG00000026398	GABRA2
6	65883853	65884089	ENSCHIG00000009371	COX7B2
6	66074635	66151140	ENSCHIG00000011129	GABRA4
6	67702840	67712254	ENSCHIG00000025771	SLC10A4
6	67722476	67860113	ENSCHIG00000012165	FRYL
6	69071416	69470734	ENSCHIG00000015721	SCFD2
6	78601491	78608837	ENSCHIG00000007450
6	81446291	81851971	ENSCHIG00000010390	EPHA5
6	86965565	87335737	ENSCHIG00000019612	SLC4A4
7	26285303	26760975	ENSCHIG00000020190	EDIL3
7	28868887	29174470	ENSCHIG00000020381	SSBP2
8	9274537	9457853	ENSCHIG00000011751	KIF13B
8	15546564	15614400	ENSCHIG00000007822
8	31598004	31789092	ENSCHIG00000007870
8	39520992	39583863	ENSCHIG00000012407	RCL1
8	43853860	44028617	ENSCHIG00000014695	DOCK8
8	75539245	75599796	ENSCHIG00000024034	FAM219A
8	75600528	75672302	ENSCHIG00000015187	DNAI1
8	84019284	84076828	ENSCHIG00000022062	BICD2
8	87900079	87948429	ENSCHIG00000008091
9	28953108	29151575	ENSCHIG00000015722	AFG1L
10	67375001	67479659	ENSCHIG00000006777	EIF2AK4
10	79155012	79218326	ENSCHIG00000012503	TRAC
10	80514829	80529766	ENSCHIG00000020679	TGM1
10	85102057	85223977	ENSCHIG00000014850	GLCE
10	85721530	85870092	ENSCHIG00000023253	CORO2B
10	87169552	87239107	ENSCHIG00000015028	AAGAB
11	14669576	14703227	ENSCHIG00000012340	NLRC4
11	14814450	15023548	ENSCHIG00000008751	BIRC6
11	15041613	15221433	ENSCHIG00000017374	TTC27
11	15235367	15236211	ENSCHIG00000022577
11	60440895	60442088	ENSCHIG00000009561	B3GNT2
11	66588631	66689776	ENSCHIG00000015145	APLF
11	67084121	67340546	ENSCHIG00000023428	ANTXR1
11	72047001	72055547	ENSCHIG00000018062	MPV17
11	72057305	72058003	ENSCHIG00000026159	UCN
11	72058696	72080414	ENSCHIG00000014797	TRIM54
12	33616999	33884965	ENSCHIG00000013378	MYCBP2
12	50939194	50945162	ENSCHIG00000018520	EEF1AKMT1
12	50907677	50937386	ENSCHIG00000014106	IL17D
12	51337758	51367629	ENSCHIG00000020738	FGF9
13	3653981	3721295	ENSCHIG00000013158	SLX4IP
13	22368536	22557435	ENSCHIG00000008531	DNAJC1
13	27595563	27654015	ENSCHIG00000000499	PRPF18
13	30412560	30612759	ENSCHIG00000015471	RSU1
13	31591356	31702889	ENSCHIG00000023775	MRC1
13	38994253	39231741	ENSCHIG00000022048	CFAP61
13	40114450	40135960	ENSCHIG00000001974
13	40119449	40130800	ENSCHIG00000025252	NKX2-2
13	40138886	40152401	ENSCHIG00000001982
13	50695912	50703155	ENSCHIG00000015699	MAVS
13	51322561	51331072	ENSCHIG00000016611	SLC4A11
13	51333411	51346162	ENSCHIG00000014634	ITPA
13	51348911	51358967	ENSCHIG00000009311	DDRGK1
13	56020108	56225102	ENSCHIG00000021023	PHACTR3
13	56388566	56413718	ENSCHIG00000017167	EDN3
13	56459962	56564553	ENSCHIG00000026441	ZNF831
13	56897937	56920324	ENSCHIG00000002125
13	57779094	57832304	ENSCHIG00000019681	PMEPA1
13	58863739	59000588	ENSCHIG00000020130	FAM210B
13	59000441	59023505	ENSCHIG00000026320	NSFL1C
13	59109338	59153253	ENSCHIG00000022086	SNPH
13	59419686	59455049	ENSCHIG00000015538	RSPO4
13	59493880	59538063	ENSCHIG00000018246	ANGPT4
13	60294999	60296395	ENSCHIG00000018593	DEFB119
13	60930526	60981882	ENSCHIG00000012891	TM9SF4
13	61052794	61088140	ENSCHIG00000027020	KIF3B
13	61110190	61197682	ENSCHIG00000025369	ASXL1
13	61206755	61334866	ENSCHIG00000025689	NOL4L
13	62712057	62720245	ENSCHIG00000015683	E2F1
13	62768100	62801805	ENSCHIG00000018677	ZNF341
13	62814775	62861296	ENSCHIG00000015320	CHMP4B
13	63162807	63189361	ENSCHIG00000002210
13	64551111	64661947	ENSCHIG00000016721	PHF20
13	64779348	64927968	ENSCHIG00000025392	EPB41L1
13	65769486	65774102	ENSCHIG00000011021	GHRH
13	77276878	77352415	ENSCHIG00000017253	B4GALT5
13	77686768	77711134	ENSCHIG00000025237	TMEM189
14	50289818	50589586	ENSCHIG00000023102	CPA6
14	50666294	50796695	ENSCHIG00000012007	ARFGEF1
14	50799668	50896475	ENSCHIG00000023489	CSPP1
14	51897890	52007440	ENSCHIG00000016873	PDE7A
15	6159565	6198120	ENSCHIG00000024661	LRP4
15	6361974	6382571	ENSCHIG00000014614	ATG13
15	23918076	24140560	ENSCHIG00000018028	METTL15
15	24141908	24226608	ENSCHIG00000002772	KIF18A
15	32118087	32314109	ENSCHIG00000017555	STIM1
15	34140116	34141717	ENSCHIG00000024977	HBE1
15	34638553	34641440	ENSCHIG00000017985
15	34623317	34638876	ENSCHIG00000020830	LOC102170446
15	39485068	39983128	ENSCHIG00000019548	SBF2
16	25183285	25316762	ENSCHIG00000013995	SUSD4
16	25578870	25635231	ENSCHIG00000018229	CAPN2
16	25635495	25704335	ENSCHIG00000025253	TP53BP2
16	31887822	32154225	ENSCHIG00000025145	AKT3
16	53632915	53685790	ENSCHIG00000017507	KLHL20
17	55797678	56012048	ENSCHIG00000007168
18	13215809	13264020	ENSCHIG00000027216	IRF8
18	13283314	13495160	ENSCHIG00000004125
18	37612099	37640279	ENSCHIG00000022884	UTP4
18	48772857	48924023	ENSCHIG00000013381	SIPA1L3
18	48913898	48914002	ENSCHIG00000006604	RF00026
19	10793797	10846291	ENSCHIG00000025276	INTS2
19	20003280	20058373	ENSCHIG00000009010	FAM222B
19	20413800	20420514	ENSCHIG00000013728	CRYBA1
19	20429708	20448543	ENSCHIG00000015671	NUFIP2
19	20459302	20459408	ENSCHIG00000001770	RF00026
19	22422815	22442244	ENSCHIG00000013342	INPP5K
19	22398170	22420698	ENSCHIG00000023103	MYO1C
19	22492597	22529707	ENSCHIG00000023042	SLC43A2
19	22659253	22695346	ENSCHIG00000022107	SMYD4
19	22773864	22847884	ENSCHIG00000026067	RTN4RL1
19	22877957	23077056	ENSCHIG00000021998	SMG6
19	23102420	23138526	ENSCHIG00000012808	SGSM2
19	23407541	23416943	ENSCHIG00000012985
19	23547087	23647294	ENSCHIG00000019173	RAP1GAP2
19	34736403	34736538	ENSCHIG00000001830	RF00544
19	34736404	34736538	ENSCHIG00000003442	RF00190
19	48579449	48705140	ENSCHIG00000012772	BPTF
19	51051808	51372319	ENSCHIG00000020861	RPTOR
20	25442895	25556675	ENSCHIG00000025172	NDUFS4
20	27239443	27385137	ENSCHIG00000003849
20	53298859	53908044	ENSCHIG00000020499	CDH18
20	58573987	58803756	ENSCHIG00000016556	TRIO
21	16220901	16903562	ENSCHIG00000014364	AGBL1
21	59403639	59518191	ENSCHIG00000020103	CLMN
21	67248024	67252188	ENSCHIG00000011000
21	67302348	67412772	ENSCHIG00000018506	MARK3
22	10258824	10343326	ENSCHIG00000021299	LRRFIP2
22	10342102	10427911	ENSCHIG00000011953	MLH1
22	15149941	15353229	ENSCHIG00000012109	ANO10
22	16637799	16644237	ENSCHIG00000016016	PRRT3
22	16645805	16653077	ENSCHIG00000013908	CRELD1
22	16653905	16665164	ENSCHIG00000008351	IL17RC
22	16666638	16676479	ENSCHIG00000006313	IL17RE
22	16704314	16712546	ENSCHIG00000026027	RPUSD3
22	28900723	29033535	ENSCHIG00000000699
22	58967499	58984428	ENSCHIG00000003247	RAB43
23	8786306	8786410	ENSCHIG00000001074	RF00026
23	8636607	8868298	ENSCHIG00000007119	JARID2
23	47871981	48673939	ENSCHIG00000024242	KHDRBS2
24	48503185	48749796	ENSCHIG00000014455	CTIF
24	52416425	53229521	ENSCHIG00000025162	DCC
24	53763284	53772607	ENSCHIG00000002811
24	53789588	53860928	ENSCHIG00000011602	MBD2
24	60675213	60773729	ENSCHIG00000023320	PIGN
24	60777913	60886523	ENSCHIG00000018243	KIAA1468
25	3359672	3370665	ENSCHIG00000014407	TFAP4
26	38481748	38531670	ENSCHIG00000020514	PCGF5
27	3252509	3331944	ENSCHIG00000025159	UBE2E2
28	1972850	2015043	ENSCHIG00000015594	CHAT
28	2023053	2024627	ENSCHIG00000010324	SLC18A3
28	19717735	19799463	ENSCHIG00000014391	FAM241B
28	31895105	31934105	ENSCHIG00000023397	RASGEF1A
28	39795472	39795573	ENSCHIG00000005341	RF00026

## Sheet: S7-2
Table S7-2 Summary of the positively selected genes identified in Jintang Black goats
Chr	Starting position	Ending position	Gene ID	Gene name
1	8276968	8389930	ENSCHIG00000025461	CYYR1
1	27821806	28135555	ENSCHIG00000025102	GBE1
1	32497981	32890493	ENSCHIG00000024207	CADM2
1	33843315	33934283	ENSCHIG00000021391	VGLL3
1	43892242	44200833	ENSCHIG00000005420	FILIP1L
1	44200385	44282796	ENSCHIG00000013003	CMSS1
1	51526776	51814997	ENSCHIG00000005821
1	52012236	52012374	ENSCHIG00000006562	RF00554
1	52032449	52318204	ENSCHIG00000022744	BBX
1	79491812	79543470	ENSCHIG00000005970
1	85023734	85024009	ENSCHIG00000000543	RF01953
1	85111362	85111430	ENSCHIG00000003175	RF01952
1	85111565	85111793	ENSCHIG00000009905	RF01951
1	109199894	109200192	ENSCHIG00000006636	RF00100
2	2461593	2592617	ENSCHIG00000022417	UBR4
2	10583022	10692918	ENSCHIG00000026543	EYA3
2	31315222	31385109	ENSCHIG00000025342	SMARCAL1
2	49939922	49940027	ENSCHIG00000002994	RF00026
2	49932625	49951749	ENSCHIG00000020913	COQ10B
2	74438414	74599514	ENSCHIG00000020851	R3HDM1
2	74652155	74699787	ENSCHIG00000002692	LCT
2	74710388	74744972	ENSCHIG00000017476	MCM6
2	97336068	97419287	ENSCHIG00000013118	ACVR1C
3	14560414	14602132	ENSCHIG00000013259	TRIT1
3	21194796	21229415	ENSCHIG00000025017	MKNK1
3	24142139	24571767	ENSCHIG00000008259
3	38686784	38690402	ENSCHIG00000008309
3	38788856	38831443	ENSCHIG00000015244
3	38863922	38923797	ENSCHIG00000020023	EFCAB7
3	46084753	46135120	ENSCHIG00000019727	CTH
3	80657356	80684981	ENSCHIG00000020361	RNPC3
3	80732229	80761522	ENSCHIG00000015030	LOC102169641
3	87107542	87113139	ENSCHIG00000006926
3	87128893	87168110	ENSCHIG00000023186	AHCYL1
3	87179697	87197469	ENSCHIG00000012301	STRIP1
3	92117215	92250932	ENSCHIG00000019909	SYCP1
3	96461407	96569303	ENSCHIG00000013499	WARS2
3	100219399	100255226	ENSCHIG00000012451	ARNT
3	110920402	110963644	ENSCHIG00000009511	SLAMF1
3	111750027	111752845	ENSCHIG00000007140	NIT1
3	111754211	111756400	ENSCHIG00000025706	DEDD
4	2423922	2521998	ENSCHIG00000012513	RBM33
4	6150637	6206991	ENSCHIG00000013334	AGAP3
4	19659465	19660862	ENSCHIG00000003452	CHRM2
4	21520846	21625213	ENSCHIG00000021959	CALD1
4	23414971	23698177	ENSCHIG00000014420	CHCHD3
4	24951871	25309188	ENSCHIG00000023032	MKLN1
4	42962216	42970039	ENSCHIG00000022903	POLM
4	43024278	43059671	ENSCHIG00000015555	GCK
4	64583652	64635687	ENSCHIG00000016804	TMEM168
4	72255542	72291690	ENSCHIG00000010589	PIK3CG
4	75944889	76159854	ENSCHIG00000005856	FBXL13
4	88490708	88636829	ENSCHIG00000025829	IGF2BP3
4	89875117	90233385	ENSCHIG00000011401	DNAH11
4	107210570	107363318	ENSCHIG00000013760	DYNC1I1
4	110416541	110668521	ENSCHIG00000011604	CDK6
5	15529752	15799526	ENSCHIG00000026547	MGAT4C
5	19013193	19055103	ENSCHIG00000001417
5	39280545	39549085	ENSCHIG00000016370	CNTN1
5	41271351	41457275	ENSCHIG00000025333	KIF21A
5	46975882	46991468	ENSCHIG00000021197	TMBIM4
5	47291473	47306445	ENSCHIG00000013893	HMGA2
5	55558382	55630475	ENSCHIG00000024408	LRP1
5	56351690	56352454	ENSCHIG00000002500	LOC102189464
5	56482062	56504944	ENSCHIG00000009196	RNF41
5	56698946	56702597	ENSCHIG00000010333	RAB5B
5	56753468	56773445	ENSCHIG00000026207	PYM1
5	58717174	58845683	ENSCHIG00000026764	NTN4
5	59425245	59760839	ENSCHIG00000025886	CFAP54
5	64513086	64552019	ENSCHIG00000025652	WASHC3
5	66739834	66999699	ENSCHIG00000015554	CHST11
5	68406778	68520690	ENSCHIG00000015728	POLR3B
5	68567436	68740232	ENSCHIG00000022571	RFX4
5	72578513	72868132	ENSCHIG00000014027	RBFOX2
5	109257520	109277779	ENSCHIG00000015505	GTPBP1
6	36987612	37118958	ENSCHIG00000026645	ABCG2
6	37905295	38068616	ENSCHIG00000019851	LCORL
6	40713669	40958412	ENSCHIG00000026213	KCNIP4
6	55394526	55436569	ENSCHIG00000007390
6	60794237	61155969	ENSCHIG00000017113	LIMCH1
6	70711312	70794841	ENSCHIG00000022287	KIT
6	72368072	72404274	ENSCHIG00000013585	PPAT
6	85373524	85511445	ENSCHIG00000022594	LOC108633190
6	88713933	88880529	ENSCHIG00000018404	ANKRD17
6	104893202	105011867	ENSCHIG00000020439	STX18
6	105775415	105778648	ENSCHIG00000007609	ZNF518B
6	113769441	113855783	ENSCHIG00000007551
6	113803216	114109867	ENSCHIG00000017846
7	9265296	9353499	ENSCHIG00000022821	SLCO4C1
7	10496330	10598930	ENSCHIG00000001988	ST8SIA4
7	15292700	15367632	ENSCHIG00000008705	ELL2
7	16154260	16526922	ENSCHIG00000011686	MCTP1
7	48912986	49005932	ENSCHIG00000024821	PDGFRB
7	63020909	63057802	ENSCHIG00000004685	TGFBI
7	63063115	63115916	ENSCHIG00000007078
7	63124966	63133300	ENSCHIG00000020059	LECT2
7	63137005	63154106	ENSCHIG00000026790	FBXL21P
7	65039859	65651871	ENSCHIG00000023121	FSTL4
7	67352917	67364146	ENSCHIG00000016980	LOC108636372
8	38778508	38918893	ENSCHIG00000021856	RIC1
8	39111389	39155966	ENSCHIG00000017669	PLGRKT
8	39702366	39703235	ENSCHIG00000001745	PLPP6
8	39700537	39743581	ENSCHIG00000020946
8	43338472	43347358	ENSCHIG00000020138	DMRT2
8	44179687	44181000	ENSCHIG00000006716	FOXD4L1
8	44222470	44426863	ENSCHIG00000006743	PGM5
8	63759344	63825181	ENSCHIG00000022353	TGFBR1
8	96427766	96551371	ENSCHIG00000008945	ZNF462
9	10401976	10606079	ENSCHIG00000022836	ME1
9	17476027	17586390	ENSCHIG00000002540
9	28797451	28918070	ENSCHIG00000018293	FOXO3
9	32132870	32135903	ENSCHIG00000016800	POPDC3
10	45826784	45970530	ENSCHIG00000000932
10	70562104	70793629	ENSCHIG00000015768	C15orf41
10	72761736	72767207	ENSCHIG00000003341	ACTC1
10	77060167	77109606	ENSCHIG00000026244	RPGRIP1
10	77111067	77145009	ENSCHIG00000011840	SUPT16H
10	77146654	77183350	ENSCHIG00000026157	CHD8
10	87863832	87909288	ENSCHIG00000015830	ZWILCH
10	98921803	98992696	ENSCHIG00000001172
11	14814450	15023548	ENSCHIG00000008751	BIRC6
11	27680629	27681258	ENSCHIG00000025999
11	48878547	48915019	ENSCHIG00000021013	USP39
11	60688432	60695455	ENSCHIG00000012499	TMEM17
11	68312091	68325798	ENSCHIG00000018864	PCYOX1
11	72047001	72055547	ENSCHIG00000018062	MPV17
11	72057305	72058003	ENSCHIG00000026159	UCN
11	72058696	72080414	ENSCHIG00000014797	TRIM54
11	72100579	72108355	ENSCHIG00000026811	SLC30A3
11	74156180	74321363	ENSCHIG00000016656	NCOA1
11	94031929	94571672	ENSCHIG00000018070	DENND1A
11	96056864	96307910	ENSCHIG00000019810	PBX3
11	96936644	97023166	ENSCHIG00000019164	LMX1B
12	20087327	20185643	ENSCHIG00000005793
12	33616999	33884965	ENSCHIG00000013378	MYCBP2
12	33902930	33917396	ENSCHIG00000012392	FBXL3
12	33923109	33931885	ENSCHIG00000024409	CLN5
12	50114390	50230030	ENSCHIG00000026716	RNF17
12	50765029	50829850	ENSCHIG00000020031	CRYL1
12	51136382	51140774	ENSCHIG00000016828	SAP18
12	51148721	51160677	ENSCHIG00000017508	SKA3
12	51160575	51221005	ENSCHIG00000018849	ZDHHC20
12	51337758	51367629	ENSCHIG00000020738	FGF9
13	22144589	22357614	ENSCHIG00000010933	MLLT10
13	22368536	22557435	ENSCHIG00000008531	DNAJC1
13	44250828	44273513	ENSCHIG00000002052
13	58173993	58260399	ENSCHIG00000009982	BMP7
13	63244165	63249361	ENSCHIG00000014323	ASIP
13	78369672	78388786	ENSCHIG00000024448	DPM1
14	16111092	16139532	ENSCHIG00000017066	POP1
14	16173704	16256273	ENSCHIG00000015486	NIPAL2
14	22931417	23101978	ENSCHIG00000001194
14	49407742	49724255	ENSCHIG00000002674	C8orf34
14	50666294	50796695	ENSCHIG00000012007	ARFGEF1
14	50799668	50896475	ENSCHIG00000023489	CSPP1
14	50931104	50931212	ENSCHIG00000004114	RF00001
14	50914983	50930753	ENSCHIG00000020229	COPS5
14	66867923	66891330	ENSCHIG00000025130	SQLE
14	66889473	66949696	ENSCHIG00000012199	WASHC5
14	66956316	67182575	ENSCHIG00000027170	NSMCE2
14	69249702	69269278	ENSCHIG00000001485
14	80832069	80893852	ENSCHIG00000018027	ZC3H3
15	6341362	6355467	ENSCHIG00000022137	ARHGAP1
15	6361974	6382571	ENSCHIG00000014614	ATG13
15	31930395	31933366	ENSCHIG00000025475	LOC102169399
15	54568062	54831612	ENSCHIG00000019818	SIK3
15	63689597	64003707	ENSCHIG00000015147	DDX10
15	67914546	68024379	ENSCHIG00000016981	MTMR2
16	22752319	22791506	ENSCHIG00000021377	MARC2
16	22791235	22815202	ENSCHIG00000001173	MARC1
16	31887822	32154225	ENSCHIG00000025145	AKT3
16	49973055	49974000	ENSCHIG00000025283	HES4
16	54008065	54722027	ENSCHIG00000025778	RABGAP1L
16	65997830	66012912	ENSCHIG00000010860	PRG4
16	66013111	66074999	ENSCHIG00000014240	TPR
16	69799980	69832687	ENSCHIG00000025983	TMEM206
16	69836243	69901612	ENSCHIG00000017773	PPP2R5A
16	70126367	70204625	ENSCHIG00000021252	INTS7
17	2852560	2854716	ENSCHIG00000012543	C22orf31
17	2858650	3000945	ENSCHIG00000011353	ZNRF3
17	18111669	18192707	ENSCHIG00000022379	CLIP1
17	52443573	52514937	ENSCHIG00000018436	ELF2
17	55797678	56012048	ENSCHIG00000007168
17	56643734	56743083	ENSCHIG00000016285	FREM3
17	57695477	57779028	ENSCHIG00000023676	ANAPC10
17	66647821	66821284	ENSCHIG00000020096	TMEM131L
17	66837333	66867720	ENSCHIG00000025899	TLR2
18	26875088	26902276	ENSCHIG00000026307	ADGRG5
18	49043830	49072651	ENSCHIG00000011318	CATSPERG
18	57016159	57023607	ENSCHIG00000027043
19	27348737	27362472	ENSCHIG00000023991	CNTROB
19	43631691	43633808	ENSCHIG00000025089
19	43626752	43633391	ENSCHIG00000013508	ASB16
20	13756129	13852600	ENSCHIG00000024544	NLN
20	14463498	14716930	ENSCHIG00000016233	CWC27
20	24981785	25059584	ENSCHIG00000027018
20	33010258	33202927	ENSCHIG00000016815	PLCXD3
20	39727037	39742067	ENSCHIG00000011727	AMACR
20	53298859	53908044	ENSCHIG00000020499	CDH18
21	33529749	33577873	ENSCHIG00000017971	ARID3B
21	44806146	44941998	ENSCHIG00000026248	KIAA0391
21	46902005	47144485	ENSCHIG00000011846	MIPOL1
22	13088494	13123411	ENSCHIG00000023900	ENTPD3
22	28068060	28094919	ENSCHIG00000022511
22	28682165	28761515	ENSCHIG00000011713	GXYLT2
22	28786367	28884814	ENSCHIG00000012271	SHQ1
22	28900723	29033535	ENSCHIG00000000699
22	29145723	29218588	ENSCHIG00000026041	RYBP
22	31527873	31755428	ENSCHIG00000022111	MITF
22	48718401	48732716	ENSCHIG00000021650	WDR82
22	51634595	51636448	ENSCHIG00000010791	MAP34-B
22	51639453	51640761	ENSCHIG00000022773	LOC102169231
22	51652009	51653964	ENSCHIG00000023326
22	51688802	51691276	ENSCHIG00000010735	MAP28
22	51739338	51739446	ENSCHIG00000006058	RF00001
22	51732795	51753930	ENSCHIG00000023601	CDC25A
22	58923227	58950366	ENSCHIG00000010869	EFCC1
22	58967499	58984428	ENSCHIG00000003247	RAB43
23	4802186	4833469	ENSCHIG00000026124	GCNT2
23	8636607	8868298	ENSCHIG00000007119	JARID2
23	8786306	8786410	ENSCHIG00000001074	RF00026
23	34711878	34728837	ENSCHIG00000007740
23	38413971	38454337	ENSCHIG00000007763
23	38461605	38481198	ENSCHIG00000024841	C6orf222
23	42313892	42429917	ENSCHIG00000020109
23	44648578	44697134	ENSCHIG00000007764
24	4121010	4151796	ENSCHIG00000000176	C18orf63
25	3796634	3801937	ENSCHIG00000005396	ROGDI
25	9506844	9741139	ENSCHIG00000014199	CLEC16A
25	12848963	13060665	ENSCHIG00000018957	MKL2
25	30099353	30447162	ENSCHIG00000005216
25	36833080	36843800	ENSCHIG00000025122	FBXO24
25	36827036	36831854	ENSCHIG00000013691	PCOLCE
25	37145100	37154385	ENSCHIG00000025990
26	12975728	13040604	ENSCHIG00000012763	CACUL1
26	30524784	30564452	ENSCHIG00000017053	CHUK
26	33586253	33687501	ENSCHIG00000020278	PIK3AP1
27	12672380	12699571	ENSCHIG00000021954	ZNF703
28	7739354	7788352	ENSCHIG00000000249
28	19717735	19799463	ENSCHIG00000014391	FAM241B
28	20807719	20807794	ENSCHIG00000006141	RF00026
28	20795782	20835090	ENSCHIG00000018956	DNA2
28	20837572	20883693	ENSCHIG00000010345	RUFY2
29	13104955	13300896	ENSCHIG00000002227
29	39622297	39672013	ENSCHIG00000009190	APOOL

## Sheet: S7-3
Table S7-3 Summary of the positively selected genes identified in Tibetan Cashmere goats
Chr	Starting position	Ending position	Gene ID	Gene name
1	28270125	28320797	ENSCHIG00000005716
1	50156345	50377532	ENSCHIG00000024426	CBLB
1	52762156	52836991	ENSCHIG00000018255	IFT57
1	53175239	53200573	ENSCHIG00000015414	CIP2A
1	70637884	70655080	ENSCHIG00000026495
1	108977855	108988530	ENSCHIG00000016128	SHOX2
1	113413323	113413620	ENSCHIG00000006296	RF00017
1	114517246	114534625	ENSCHIG00000006131
1	114572119	114573240	ENSCHIG00000008918	P2RY1
1	117242330	117242439	ENSCHIG00000003277	RF00001
1	121554606	121575836	ENSCHIG00000025945	PLSCR1
1	132642627	132671934	ENSCHIG00000018815	MSL2
1	135506842	135579040	ENSCHIG00000020270	BFSP2
1	155266411	155341743	ENSCHIG00000023143	SATB1
2	2461593	2592617	ENSCHIG00000022417	UBR4
2	7094309	7151476	ENSCHIG00000008403	MYOM3
2	7153211	7183099	ENSCHIG00000025784	IL22RA1
2	29436616	29503523	ENSCHIG00000002862	PNKD
2	44274436	44375581	ENSCHIG00000002652	ABI2
2	74619206	74647813	ENSCHIG00000023638	UBXN4
2	75062669	75203688	ENSCHIG00000000606
2	84436340	84661473	ENSCHIG00000000643
2	84725442	84968584	ENSCHIG00000000644
3	14667484	14679624	ENSCHIG00000005567	MFSD2A
3	16769226	16898198	ENSCHIG00000021942	FOXJ3
3	17048377	17082992	ENSCHIG00000007728	ZMYND12
3	34866650	34904579	ENSCHIG00000021521	LOC102190840
3	36924285	37287711	ENSCHIG00000023685	PATJ
3	39376512	39570083	ENSCHIG00000027140	ROR1
3	55019013	55082711	ENSCHIG00000012516	PTGFR
3	63650509	63690258	ENSCHIG00000011719	CLCA1
3	68890768	69052752	ENSCHIG00000015521	TGFBR3
3	69668163	69831173	ENSCHIG00000026426	EVI5
3	71995430	72098107	ENSCHIG00000011527	ALG14
3	80732229	80761522	ENSCHIG00000015030	LOC102169641
3	87128893	87168110	ENSCHIG00000023186	AHCYL1
3	87179697	87197469	ENSCHIG00000012301	STRIP1
3	94700048	94852253	ENSCHIG00000013056	MAN1A2
3	95312380	95527658	ENSCHIG00000014664	SPAG17
3	99501319	99556426	ENSCHIG00000020643	OTUD7B
3	101230800	101242277	ENSCHIG00000021133	THEM5
3	110920402	110963644	ENSCHIG00000009511	SLAMF1
4	5284347	5338951	ENSCHIG00000026778	GALNT11
4	6088816	6109625	ENSCHIG00000018006	IQCA1L
4	6109325	6118969	ENSCHIG00000013692	ASB10
4	6349667	6385687	ENSCHIG00000019111	KCNH2
4	12556037	12938734	ENSCHIG00000012810	TPK1
4	24951871	25309188	ENSCHIG00000023032	MKLN1
4	32887302	33459183	ENSCHIG00000022820	CADPS2
4	40147529	40179946	ENSCHIG00000007285
4	43359663	43414253	ENSCHIG00000006876	OGDH
4	68849794	69123249	ENSCHIG00000020176	ST7
4	87488608	87573358	ENSCHIG00000019932	ABCB1
4	92859033	93444758	ENSCHIG00000025824	HDAC9
5	5629026	5791853	ENSCHIG00000010416	OSBPL8
5	14498915	14530815	ENSCHIG00000013366	TSPAN19
5	14530297	14764879	ENSCHIG00000027155	LRRIQ1
5	15529752	15799526	ENSCHIG00000026547	MGAT4C
5	17951263	18151736	ENSCHIG00000025211	KITLG
5	20823209	20858485	ENSCHIG00000018030	DCN
5	22964682	22978095	ENSCHIG00000022798	NUDT4
5	22988502	22993057	ENSCHIG00000025703
5	23042666	23056712	ENSCHIG00000014921	MRPL42
5	23232893	23427705	ENSCHIG00000023376	CRADD
5	26463292	26484330	ENSCHIG00000015195	ESPL1
5	26487408	26492689	ENSCHIG00000003072
5	28763488	28815433	ENSCHIG00000016898	ATF1
5	46902358	46958046	ENSCHIG00000025230	IRAK3
5	55558382	55630475	ENSCHIG00000024408	LRP1
5	55707842	55730404	ENSCHIG00000011774	MYO1A
5	64812873	64814594	ENSCHIG00000010135
5	65197017	65197123	ENSCHIG00000005663	RF00026
5	68567436	68740232	ENSCHIG00000022571	RFX4
5	104904976	104942322	ENSCHIG00000001683
5	106508763	106633917	ENSCHIG00000012104	WNK1
5	109704451	109730966	ENSCHIG00000018332	SYNGR1
5	109753832	109780374	ENSCHIG00000014927	TAB1
5	110420885	110576847	ENSCHIG00000003491	TNRC6B
5	111214896	111278662	ENSCHIG00000017767	EP300
5	118619575	118685183	ENSCHIG00000015410	PPP6R2
5	118739017	118742148	ENSCHIG00000021543	MIOX
5	118768999	118769799	ENSCHIG00000022632
5	118759033	118768729	ENSCHIG00000009831	NCAPH2
5	118774671	118776113	ENSCHIG00000018561	ODF3B
6	108680	108783	ENSCHIG00000005198	RF00026
6	14114591	14177809	ENSCHIG00000007265
6	18779958	18795591	ENSCHIG00000007278
6	36200588	36200754	ENSCHIG00000003534	RF02164
6	36200797	36200892	ENSCHIG00000002886	RF02166
6	36205904	36207478	ENSCHIG00000008747	TIGD2
6	46065702	46306939	ENSCHIG00000022041	RBPJ
6	47576349	47620105	ENSCHIG00000007366
6	88713933	88880529	ENSCHIG00000018404	ANKRD17
6	109143098	109284553	ENSCHIG00000007529
6	116746553	116761030	ENSCHIG00000026702	NOP14
6	116842365	116945069	ENSCHIG00000026634	HTT
6	117246776	117260461	ENSCHIG00000025809	IDUA
6	117256235	117258753	ENSCHIG00000004233	SLC26A1
7	48531973	48611109	ENSCHIG00000017289	NDST1
7	56060015	56169881	ENSCHIG00000016782	NR3C1
7	57514760	57527867	ENSCHIG00000013236	DELE1
7	64193581	64194147	ENSCHIG00000012125	C5orf24
7	66898830	66902627	ENSCHIG00000014151	POLR2E
7	66906700	66918974	ENSCHIG00000015532	ARHGAP45
7	66981853	67013587	ENSCHIG00000017186	ARID3A
7	67069282	67071545	ENSCHIG00000025832	ELANE
7	67075366	67078639	ENSCHIG00000014480	PRTN3
7	70171497	70185703	ENSCHIG00000016951	LOC102171703
7	70197083	70201152	ENSCHIG00000022440	TRIM52
7	83078609	83190192	ENSCHIG00000007160
7	90786670	90798163	ENSCHIG00000010686	STAP2
7	90774163	90785910	ENSCHIG00000020728	FSD1
7	102814942	102904668	ENSCHIG00000011652	MYO9B
7	102828658	103018643	ENSCHIG00000021053	PLVAP
8	70192	70310	ENSCHIG00000006434	RF00001
8	72241	72359	ENSCHIG00000006279	RF00001
8	25016341	25020038	ENSCHIG00000015472
8	25012161	25051827	ENSCHIG00000024615	HAUS6
8	38711905	38788143	ENSCHIG00000026817	ERMP1
8	39702366	39703235	ENSCHIG00000001745	PLPP6
8	39700537	39743581	ENSCHIG00000020946
8	39768421	39844867	ENSCHIG00000018337	SLC1A1
8	43012374	43235639	ENSCHIG00000007907
8	43431658	43524941	ENSCHIG00000024212	DMRT1
8	44222470	44426863	ENSCHIG00000006743	PGM5
8	60899674	61142091	ENSCHIG00000009716	ZCCHC7
8	61662593	61800345	ENSCHIG00000025388	SHB
8	68910003	68998287	ENSCHIG00000016714	XPO7
8	69503312	69524809	ENSCHIG00000003972	SORBS3
8	69665438	69903030	ENSCHIG00000018763	PEBP4
8	72201697	72479513	ENSCHIG00000001085	DOCK5
8	103066926	103071806	ENSCHIG00000008136
8	105354768	106375570	ENSCHIG00000000737	ASTN2
9	247437	332946	ENSCHIG00000002917	SLC17A5
9	374948	513335	ENSCHIG00000022242	CD109
9	12499250	12560447	ENSCHIG00000020274	TRMT11
9	18881181	19054266	ENSCHIG00000010436	MAN1A1
9	28797451	28918070	ENSCHIG00000018293	FOXO3
9	28953108	29151575	ENSCHIG00000015722	AFG1L
9	29902764	30181816	ENSCHIG00000015163	PDSS2
9	56815727	56829165	ENSCHIG00000022069	ARG1
9	56827928	56873794	ENSCHIG00000014671	MED23
9	60955048	61314992	ENSCHIG00000026148	PDE7B
9	62077079	62116023	ENSCHIG00000016224	IL20RA
9	67568494	67825985	ENSCHIG00000012210	AIG1
10	30675820	30686139	ENSCHIG00000022625	PPM1A
10	45826784	45970530	ENSCHIG00000000932
10	62723856	63152843	ENSCHIG00000014808	MDGA2
10	80580656	80594974	ENSCHIG00000020735	ADCY4
10	80598409	80600305	ENSCHIG00000016552
10	82292676	82298306	ENSCHIG00000015775	GRAMD2A
10	82392953	82577244	ENSCHIG00000011581	MYO9A
10	94236911	94323019	ENSCHIG00000008105	POLK
10	94322997	94471710	ENSCHIG00000021950	COL4A3BP
10	94634553	94672469	ENSCHIG00000021264
11	13330675	13357471	ENSCHIG00000014286	ATP6V1B1
11	14029966	14092155	ENSCHIG00000017276	XDH
11	14669576	14703227	ENSCHIG00000012340	NLRC4
11	14738455	14773753	ENSCHIG00000026569	YIPF4
11	14814450	15023548	ENSCHIG00000008751	BIRC6
11	21350965	21386693	ENSCHIG00000015581	CDKL4
11	28318730	28410417	ENSCHIG00000016866	EPAS1
11	43227413	43265147	ENSCHIG00000019857	REL
11	43517967	43594760	ENSCHIG00000015942	GCFC2
11	48350715	48436190	ENSCHIG00000018204	POLR1A
11	54876710	54901099	ENSCHIG00000004654
11	66588631	66689776	ENSCHIG00000015145	APLF
11	72047001	72055547	ENSCHIG00000018062	MPV17
11	72057305	72058003	ENSCHIG00000026159	UCN
11	72058696	72080414	ENSCHIG00000014797	TRIM54
11	94031929	94571672	ENSCHIG00000018070	DENND1A
11	98645409	98692610	ENSCHIG00000013404	SPTAN1
11	105366061	105581222	ENSCHIG00000005457	CACNA1B
11	105786567	105870838	ENSCHIG00000024860	PNPLA7
12	10373287	10586341	ENSCHIG00000018977	DOCK9
12	20087327	20185643	ENSCHIG00000005793
12	50084768	50105547	ENSCHIG00000023218	ATP12A
12	50114390	50230030	ENSCHIG00000026716	RNF17
12	50675761	50676441	ENSCHIG00000004710	GJB2
12	50765029	50829850	ENSCHIG00000020031	CRYL1
12	50964937	51052386	ENSCHIG00000016203	XPO4
12	51065403	51088462	ENSCHIG00000020837	LATS2
12	51125452	51126087	ENSCHIG00000020953
12	51136382	51140774	ENSCHIG00000016828	SAP18
12	51148721	51160677	ENSCHIG00000017508	SKA3
12	51160994	51161302	ENSCHIG00000013087	MRPL57
12	51160575	51221005	ENSCHIG00000018849	ZDHHC20
12	51229598	51281102	ENSCHIG00000019056	MICU2
12	51337758	51367629	ENSCHIG00000020738	FGF9
12	57458789	57505444	ENSCHIG00000007689	RXFP2
12	60270656	60936833	ENSCHIG00000024367	NBEA
13	22144589	22357614	ENSCHIG00000010933	MLLT10
13	22361083	22412647	ENSCHIG00000001876
13	22368536	22557435	ENSCHIG00000008531	DNAJC1
13	32767129	32882453	ENSCHIG00000024718	ARHGAP12
13	40209997	40210454	ENSCHIG00000003263
13	40260236	40269066	ENSCHIG00000025250	PAX1
13	50587433	50631463	ENSCHIG00000020702	RNF24
13	50646837	50646912	ENSCHIG00000002376	MIR103A2
13	50640812	50669335	ENSCHIG00000022905	PANK2
13	63162807	63189361	ENSCHIG00000002210
13	63263617	63280635	ENSCHIG00000026741	AHCY
13	63501243	63594625	ENSCHIG00000024810	PIGU
13	73240045	73240928	ENSCHIG00000011519	LOC102174856
13	76724018	76760652	ENSCHIG00000016579	CSE1L
13	76859168	76876315	ENSCHIG00000007753	DDX27
13	76881548	77104818	ENSCHIG00000018393	ZNFX1
14	16111092	16139532	ENSCHIG00000017066	POP1
14	16173704	16256273	ENSCHIG00000015486	NIPAL2
14	16431338	16744355	ENSCHIG00000010771	STK3
14	22931417	23101978	ENSCHIG00000001194
14	33608800	33611537	ENSCHIG00000001242
14	40046590	40106906	ENSCHIG00000013214	IL7
14	40222915	40238711	ENSCHIG00000022780	PKIA
14	62480156	62617346	ENSCHIG00000013822	PRKDC
14	66956316	67182575	ENSCHIG00000027170	NSMCE2
14	94080743	94297588	ENSCHIG00000018348	KCNQ5
15	649874	676465	ENSCHIG00000025913	PATL1
15	2458507	2468799	ENSCHIG00000014930	UBE2L6
15	6361974	6382571	ENSCHIG00000014614	ATG13
15	31930395	31933366	ENSCHIG00000025475	LOC102169399
15	31986411	32060874	ENSCHIG00000016387	NUP98
15	32081212	32093700	ENSCHIG00000027040	PGAP2
15	32118087	32314109	ENSCHIG00000017555	STIM1
15	32629320	32630267	ENSCHIG00000001334	LOC102175319
15	33971475	33972411	ENSCHIG00000022433
15	33992775	33993713	ENSCHIG00000010624	LOC102183709
15	34026333	34029383	ENSCHIG00000023338	LOC103176710
15	34091263	34092671	ENSCHIG00000026687	LOC102182894
15	34100556	34102159	ENSCHIG00000018770	LOC102175317
15	34414836	34415780	ENSCHIG00000010294	LOC102172282
15	39485068	39983128	ENSCHIG00000019548	SBF2
15	40036943	40037419	ENSCHIG00000010925	LOC102177819
15	45814360	46531484	ENSCHIG00000021925	SOX6
16	21581823	21685351	ENSCHIG00000000901
16	22700818	22714547	ENSCHIG00000014941	C1orf115
16	22752319	22791506	ENSCHIG00000021377	MARC2
16	22791235	22815202	ENSCHIG00000001173	MARC1
16	22826636	22826756	ENSCHIG00000003397	RF00619
16	27800931	27889161	ENSCHIG00000003005	LIN9
16	33534606	33669850	ENSCHIG00000018653	WDR64
16	33716250	33782176	ENSCHIG00000018212	KMO
16	33797786	33826664	ENSCHIG00000003286	FH
16	35875646	35900522	ENSCHIG00000021725	SELL
16	37511048	37637004	ENSCHIG00000018196	PRRC2C
16	37786097	38414205	ENSCHIG00000010364	DNM3
16	40416317	40421558	ENSCHIG00000017244	AGTRAP
16	40871675	40882240	ENSCHIG00000011432	UBIAD1
16	49585053	49600833	ENSCHIG00000019987	ATAD3A
16	49609696	49612679	ENSCHIG00000006814	VWA1
16	49793984	49796678	ENSCHIG00000002653	TNFRSF18
16	49802099	49819451	ENSCHIG00000014583	TTLL10
16	49823584	49823669	ENSCHIG00000009423	chi-mir-200a
16	49824216	49824289	ENSCHIG00000009340	chi-mir-200b
16	54008065	54722027	ENSCHIG00000025778	RABGAP1L
16	54830584	54903772	ENSCHIG00000016451	TNN
16	79038000	79076978	ENSCHIG00000015356	IPO9
16	79086392	79112731	ENSCHIG00000007211	LMOD1
16	79116999	79127607	ENSCHIG00000010947	TIMM17A
17	1930340	1958679	ENSCHIG00000017979	TBC1D10A
17	16828392	16856250	ENSCHIG00000015875	RAD9B
17	16856741	16863520	ENSCHIG00000008498	VPS29
17	17943415	17997505	ENSCHIG00000019922	MLXIP
17	18025800	18045621	ENSCHIG00000020553	LRRC43
17	19753091	19909059	ENSCHIG00000009383	NCOR2
17	20332263	20362819	ENSCHIG00000019152	DHX37
17	20366825	20386839	ENSCHIG00000015628	BRI3BP
17	52443573	52514937	ENSCHIG00000018436	ELF2
17	65805759	65855214	ENSCHIG00000026757	TMEM154
17	66647821	66821284	ENSCHIG00000020096	TMEM131L
17	66837333	66867720	ENSCHIG00000025899	TLR2
17	66872503	66926826	ENSCHIG00000021987	RNF175
18	15983075	15992098	ENSCHIG00000025705	VPS9D1
18	15992855	16006910	ENSCHIG00000017992	ZNF276
18	16007189	16043896	ENSCHIG00000003612	FANCA
18	16051470	16077884	ENSCHIG00000019449	SPIRE2
18	16080772	16102053	ENSCHIG00000020771	TCF25
18	24898159	24911747	ENSCHIG00000004275
18	26158111	26261951	ENSCHIG00000021821	NUP93
18	36207072	36263662	ENSCHIG00000011267	LRRC36
18	36938284	36944006	ENSCHIG00000022662	SLC7A6OS
18	36947431	36982624	ENSCHIG00000009548	PRMT7
18	36952473	36952601	ENSCHIG00000003662	RF00413
18	37390901	37572006	ENSCHIG00000015934	TANGO6
18	37600332	37602973	ENSCHIG00000025109	DERPC
18	37612099	37640279	ENSCHIG00000022884	UTP4
18	49043830	49072651	ENSCHIG00000011318	CATSPERG
18	50928104	50929384	ENSCHIG00000025627	MIA
18	50915299	50925379	ENSCHIG00000026827	SNRPA
18	56838532	56850402	ENSCHIG00000026187	TEAD2
18	56853873	56858612	ENSCHIG00000023158	DKKL1
18	56899209	56911209	ENSCHIG00000016894	SLC17A7
18	56912123	56919082	ENSCHIG00000025674	PIH1D1
18	57016159	57023607	ENSCHIG00000027043
18	62200619	62281900	ENSCHIG00000013160	LOC106503154
19	20429708	20448543	ENSCHIG00000015671	NUFIP2
19	22877957	23077056	ENSCHIG00000021998	SMG6
19	26746268	26751304	ENSCHIG00000025328	ACADVL
19	26752119	26759196	ENSCHIG00000025716	DVL2
19	26775205	26780758	ENSCHIG00000010521	ELP5
19	26768878	26774056	ENSCHIG00000006144	CTDNEP1
19	35243715	35248004	ENSCHIG00000017720	NME1
19	35294503	35447586	ENSCHIG00000023293	SPAG9
19	45834798	45874152	ENSCHIG00000019893	CDC27
19	49336218	49480133	ENSCHIG00000019855	TBCD
20	11402302	11483313	ENSCHIG00000021158	PIK3R1
20	25538062	25538393	ENSCHIG00000026360
20	25442895	25556675	ENSCHIG00000025172	NDUFS4
20	26305090	26310800	ENSCHIG00000016410	PELO
20	26157878	26322727	ENSCHIG00000021216	ITGA1
20	27239443	27385137	ENSCHIG00000003849
20	31833314	31834840	ENSCHIG00000001188
20	31880734	32042994	ENSCHIG00000018928	GHR
20	40868118	40946344	ENSCHIG00000024211	NPR3
20	60228320	60268826	ENSCHIG00000003952
21	3568873	3670222	ENSCHIG00000014564
21	54230997	54310048	ENSCHIG00000015767	TOGARAM1
21	64219449	64366877	ENSCHIG00000010594	EVL
21	64444663	64470905	ENSCHIG00000013547	YY1
21	64479484	64493519	ENSCHIG00000013851	SLC25A29
22	16294015	16296115	ENSCHIG00000015284	ZNF502
22	28900723	29033535	ENSCHIG00000000699
22	47081510	47247205	ENSCHIG00000019488	CACNA1D
22	51634595	51636448	ENSCHIG00000010791	MAP34-B
22	51639453	51640761	ENSCHIG00000022773	LOC102169231
22	51688802	51691276	ENSCHIG00000010735	MAP28
23	8636607	8868298	ENSCHIG00000007119	JARID2
23	8786306	8786410	ENSCHIG00000001074	RF00026
23	16707910	16848227	ENSCHIG00000020633	F13A1
23	21124943	21142376	ENSCHIG00000014114	ZFP57
23	29926098	30269982	ENSCHIG00000016080	RUNX2
23	30223998	30622231	ENSCHIG00000016615	SUPT3H
23	33100773	33106477	ENSCHIG00000026950	CCND3
23	33109130	33118404	ENSCHIG00000017590	BYSL
23	39245227	39259305	ENSCHIG00000018872	TULP1
23	40113765	40120427	ENSCHIG00000009071	PACSIN1
24	25908743	25958342	ENSCHIG00000016271	DSG2
24	25976355	26008273	ENSCHIG00000021842	DSG3
24	26035004	26074386	ENSCHIG00000024819	DSG4
24	33302064	33355677	ENSCHIG00000018673	ANKRD29
24	43755095	43803676	ENSCHIG00000000293	LDLRAD4
24	43894741	43895634	ENSCHIG00000006175	MC2R
24	52416425	53229521	ENSCHIG00000025162	DCC
24	56196772	56548096	ENSCHIG00000002769	WDR7
24	62156798	62187438	ENSCHIG00000006757	SERPINB7
25	156969	159368	ENSCHIG00000018800	HBZ1
25	177442	206086	ENSCHIG00000017216	LUC7L
25	214493	230685	ENSCHIG00000009202	FAM234A
25	232806	239891	ENSCHIG00000021450	RGS11
25	248065	282231	ENSCHIG00000010291	AXIN1
25	297110	299217	ENSCHIG00000016968	MRPL28
25	300848	309948	ENSCHIG00000022535	TMEM8A
25	1157561	1196149	ENSCHIG00000001484	CRAMP1
25	3412649	3417099	ENSCHIG00000022193	GLIS2
25	3419715	3421527	ENSCHIG00000005280	PAM16
25	3427765	3481606	ENSCHIG00000010358	LOC102188914
25	3627983	3651320	ENSCHIG00000016185	C25H16orf96
25	3661107	3665199	ENSCHIG00000006302	UBALD1
25	3670857	3704883	ENSCHIG00000008936	MGRN1
25	3716969	3730681	ENSCHIG00000016977	ANKS3
25	3838068	3864462	ENSCHIG00000024105	UBN1
25	3867440	3914390	ENSCHIG00000011770	PPL
25	25918204	25938944	ENSCHIG00000024795	LOC102182187
25	25952146	25963707	ENSCHIG00000020622	CLN3
25	25963706	25969255	ENSCHIG00000021439	APOBR
25	25970213	25975275	ENSCHIG00000010751	IL27
25	25989288	25991854	ENSCHIG00000017378	NUPR1
25	26790772	26794474	ENSCHIG00000014365	CCDC189
25	26781806	26790386	ENSCHIG00000020315	PHKG2
25	26795160	26806472	ENSCHIG00000008152	RNF40
25	35511499	35516561	ENSCHIG00000010053	ORAI2
25	36820325	36824784	ENSCHIG00000012056	MOSPD3
25	36827036	36831854	ENSCHIG00000013691	PCOLCE
26	25892157	26541174	ENSCHIG00000004540	SORCS3
26	29097263	29114508	ENSCHIG00000023969	KCNIP2
26	41892624	41987770	ENSCHIG00000006638	PTEN
26	42034618	42068875	ENSCHIG00000020310	ATAD1
26	42079097	42114695	ENSCHIG00000013444	PAPSS2
27	4232083	4255874	ENSCHIG00000004566
28	3494829	3506059	ENSCHIG00000011706	RBP3
28	19757099	19757746	ENSCHIG00000020271	NEUROG3
28	19717735	19799463	ENSCHIG00000014391	FAM241B
29	5578433	5758945	ENSCHIG00000021611	NOX4
29	19266433	19515583	ENSCHIG00000002256
29	39622297	39672013	ENSCHIG00000009190	APOOL
29	41298479	41313658	ENSCHIG00000022447	GANAB
29	42096009	42113987	ENSCHIG00000005227	HRASLS5
29	47948684	47958855	ENSCHIG00000016576	ORAOV1
