# Supplementary material for: Comparative genome analyses reveal the unique genetic composition and selection signals underlying the phenotypic characteristics of three Chinese domestic goat breeds
Source: Genet Sel Evol. 2019 Nov 26;51:70. doi: 10.1186/s12711-019-0512-4 (PMC6880376; doi:10.1186/s12711-019-0512-4)
Supplement: Supplementary file 12 — Additional file 12: Table S8. Significantly enriched biological terms for the positively selected genes identified in three Chinese goat breeds (CB, JT, and TC) [file 12711_2019_512_MOESM12_ESM.xlsx]

## Sheet: List
Table S8 Significantly enriched biological terms for the positively selected genes identified in three Chinese goat breeds (CB, JT, and TC)
Table S8-1 Significantly enriched MGI-MP terms for the selected genes in Tibetan Cashmere goats
Table S8-2 Significantly enriched MGI-MP terms for the selected genes in Chengdu Brown goats
Table S8-3 Significantly enriched MGI-MP terms for the selected genes in Jintang Black goats
Table S8-4 Significantly enriched KEGG pathways for the selected genes in Tibetan Cashmere goats
Table S8-5 Significantly enriched KEGG pathways for the selected genes in Chengdu Brown goats
Table S8-6 Significantly enriched KEGG pathways for the selected genes in Jintang Black goats
Table S8-7 Significantly enriched Gene ontology (GO) terms for the selected genes in Tibetan Cashmere goats
Table S8-8 Significantly enriched Gene ontology (GO) terms for the selected genes in Chengdu Brown goats
Table S8-9 Significantly enriched Gene ontology (GO) terms for the selected genes in Jintang Black goats

## Sheet: S8-1
Table S8-1 Significantly enriched MGI-MP terms for the selected genes in Tibetan Cashmere goats
ID	Terms	Overlap	Adjusted P value	Genes
MP:0011109	lethality throughout fetal growth and development, incomplete penetrance	12/170	0.0178091	TGFBR3;YY1;NDST1;KITLG;ZFP57;LRP1;SHOX2;HTT;EP300;BIRC6;JARID2;RAD9B
MP:0001914	hemorrhage	14/230	0.0178091	PLVAP;MGRN1;EPAS1;F13A1;ARID3A;SHB;LATS2;STIM1;WNK1;EP300;BIRC6;TAB1;JARID2;TRIM54
MP:0000295	trabecula carnea hypoplasia	6/43	0.025612	ANKRD17;TGFBR3;LATS2;WNK1;JARID2;RBPJ
MP:0011089	perinatal lethality, complete penetrance	13/217	0.025612	LRP1;HTT;PIK3R1;NR3C1;NDST1;KITLG;STIM1;FGF9;RFX4;EP300;BIRC6;NUP98;JARID2
MP:0011099	lethality throughout fetal growth and development, complete penetrance	12/196	0.0263503	NCOR2;TGFBR3;PLVAP;GJB2;KITLG;STIM1;EPAS1;SHOX2;TAB1;JARID2;SPTAN1;RUNX2
MP:0001953	respiratory failure	10/147	0.0368955	YY1;NDST1;STIM1;FGF9;EPAS1;EP300;NR3C1;JARID2;SOX6;RUNX2
MP:0002652	thin myocardium	7/72	0.0373112	ANKRD17;TGFBR3;WNK1;MGRN1;EP300;TAB1;JARID2
MP:0000715	decreased thymocyte number	8/101	0.0467627	KITLG;IL7;PRKDC;SATB1;NCAPH2;EP300;RUNX2;PAX1
MP:0008826	abnormal splenic cell ratio	5/36	0.046765	SELL;NCAPH2;REL;JARID2;RUNX2
MP:0001575	cyanosis	11/192	0.046765	YY1;NDST1;NBEA;STIM1;MAN1A2;EPAS1;DVL2;EP300;ROR1;NR3C1;RUNX2
MP:0005167	abnormal blood-brain barrier function	4/21	0.049361	ABCB1;NOX4;NR3C1;MFSD2A
MP:0009642	abnormal blood homeostasis	8/108	0.049361	GHR;KITLG;ARG1;NDUFS4;NPR3;AGTRAP;ROR1;XDH

## Sheet: S8-2
Table S8-2 Significantly enriched MGI-MP terms for the selected genes in Chengdu Brown goats
None of the terms were significantly enriched for the selected genes

## Sheet: S8-3
Table S8-3 Significantly enriched MGI-MP terms for the selected genes in Jintang Black goats
ID	Terms	Overlap	Adjusted P value	Genes
MP:0011089	perinatal lethality, complete penetrance	11/217	0.0122641	ZNRF3;LRP1;FGF9;CHUK;DMRT2;GBE1;RFX4;KIT;BIRC6;LMX1B;JARID2

## Sheet: S8-4
Table S8-4 Significantly enriched KEGG pathways for the selected genes in Tibetan Cashmere goats
None of the terms were significantly enriched for the selected genes

## Sheet: S8-5
Table S8-5 Significantly enriched KEGG pathways for the selected genes in Chengdu Brown goats
None of the terms were significantly enriched for the selected genes

## Sheet: S8-6
Table S8-6 Significantly enriched KEGG pathways for the selected genes in Jintang Black goats
Terms	Overlap	Adjusted P value	Genes
PI3K-Akt signaling pathway	12/357	0.0345517	CHRM2;PDGFRB;CDK6;FGF9;CHUK;AKT3;KIT;PPP2R5A;PIK3AP1;FOXO3;PIK3CG;TLR2

## Sheet: S8-7
Table S8-7 Significantly enriched Gene ontology (GO) terms for the selected genes in Tibetan Cashmere goats
Category	ID	Term	Overlap	Adjusted P-value	Genes
Biological Processes	None of the terms were significantly enriched for the selected genes
Molecular Function	None of the terms were significantly enriched for the selected genes
Cellular Component	None of the terms were significantly enriched for the selected genes

## Sheet: S8-8
Table S8-8 Significantly enriched Gene ontology (GO) terms for the selected genes in Chengdu Brown goats
Category	ID	Term	Overlap	Adjusted P-value	Genes
Biological Processes	None of the terms were significantly enriched for the selected genes
Molecular Function	None of the terms were significantly enriched for the selected genes
Cellular Component	None of the terms were significantly enriched for the selected genes

## Sheet: S8-9
Table S8-9 Significantly enriched Gene ontology (GO) terms for the selected genes in Jintang Black goats
Category	ID	Term	Overlap	Adjusted P-value	Genes
Biological Processes	GO:0051896	regulation of protein kinase B signaling	9/164	0.0251321	PDGFRB;FGF9;KIT;GCNT2;CNTN1;PIK3AP1;TGFBR1;PIK3CG;RNF41
Biological Processes	GO:0051897	positive regulation of protein kinase B signaling	8/128	0.0251321	PDGFRB;FGF9;KIT;GCNT2;CNTN1;PIK3AP1;TGFBR1;PIK3CG
Molecular Function	GO:0032559	adenyl ribonucleotide binding	11/280	0.0257637	POPDC3;ACTC1;CDK6;MKNK1;CHD8;AKT3;SIK3;ME1;MCM6;TGFBR1;GCK
Molecular Function	GO:0046934	phosphatidylinositol-4,5-bisphosphate 3-kinase activity	5/69	0.0494394	PDGFRB;FGF9;KIT;PIK3AP1;PIK3CG
Molecular Function	GO:0005524	ATP binding	9/256	0.0494394	ACTC1;CDK6;MKNK1;CHD8;AKT3;SIK3;MCM6;TGFBR1;GCK
Molecular Function	GO:0035004	phosphatidylinositol 3-kinase activity	5/77	0.0494394	PDGFRB;FGF9;KIT;PIK3AP1;PIK3CG
Molecular Function	GO:0052813	phosphatidylinositol bisphosphate kinase activity	5/72	0.0494394	PDGFRB;FGF9;KIT;PIK3AP1;PIK3CG
Cellular Component	None of the terms were significantly enriched for the selected genes
