# Supplementary material for: Comparative genome analyses reveal the unique genetic composition and selection signals underlying the phenotypic characteristics of three Chinese domestic goat breeds
Source: Genet Sel Evol. 2019 Nov 26;51:70. doi: 10.1186/s12711-019-0512-4 (PMC6880376; doi:10.1186/s12711-019-0512-4)
Supplement: Supplementary file 14 — Additional file 14: Table S10. Summary of the selected genes identified in the comparison between Tibetan Cashmere goats and four lowland domestic goat breeds (CB, JT, MD, and MN). [file 12711_2019_512_MOESM14_ESM.xlsx]

## Sheet: S10
Supplementary Table S10 Summary of the selected genes identified in the comparison between Tibetan Cashmere goats and four lowland domestic goat breeds (CB, JT, MD, and MN)
Chr	Starting position	Ending position	Gene ID	Gene name
1	28270125	28320797	ENSCHIG00000005716
1	45862455	45911976	ENSCHIG00000019375	NXPE3
1	45957477	45957581	ENSCHIG00000005452	RF00026
1	53175239	53200573	ENSCHIG00000015414	CIP2A
1	111287641	111356806	ENSCHIG00000022844	GMPS
1	114517246	114534625	ENSCHIG00000006131
1	116281003	116626541	ENSCHIG00000014066	MED12L
1	131411409	131465493	ENSCHIG00000006802
1	135506842	135579040	ENSCHIG00000020270	BFSP2
1	149181879	149192422	ENSCHIG00000002508	PIGP
1	149206091	149318631	ENSCHIG00000017294	TTC3
2	2461593	2592617	ENSCHIG00000022417	UBR4
2	6418004	6447360	ENSCHIG00000024030	HNRNPR
2	7153211	7183099	ENSCHIG00000025784	IL22RA1
2	10074719	10075711	ENSCHIG00000011308	GPR3
2	21422725	21433757	ENSCHIG00000006237
2	39140137	39237793	ENSCHIG00000003956	PTH2R
2	74619206	74647813	ENSCHIG00000023638	UBXN4
2	75062669	75203688	ENSCHIG00000000606
2	84725442	84968584	ENSCHIG00000000644
3	374066	381135	ENSCHIG00000024323	DTYMK
3	384391	392515	ENSCHIG00000018105	ATG4B
3	14667484	14679624	ENSCHIG00000005567	MFSD2A
3	14950984	14991954	ENSCHIG00000014367	ZMPSTE24
3	17048377	17082992	ENSCHIG00000007728	ZMYND12
3	20857549	20861311	ENSCHIG00000018316	TSPAN1
3	20864646	20872421	ENSCHIG00000014882	POMGNT1
3	24990520	25472364	ENSCHIG00000023469	FAF1
3	61589401	61605565	ENSCHIG00000012566	RPF1
3	61626844	61674595	ENSCHIG00000004028	SPATA1
3	61675687	61687704	ENSCHIG00000022826	CTBS
3	63650509	63690258	ENSCHIG00000011719	CLCA1
3	68890768	69052752	ENSCHIG00000015521	TGFBR3
3	71995430	72098107	ENSCHIG00000011527	ALG14
3	101230800	101242277	ENSCHIG00000021133	THEM5
4	6088816	6109625	ENSCHIG00000018006	IQCA1L
4	6109325	6118969	ENSCHIG00000013692	ASB10
4	6349667	6385687	ENSCHIG00000019111	KCNH2
4	24951871	25309188	ENSCHIG00000023032	MKLN1
4	32887302	33459183	ENSCHIG00000022820	CADPS2
4	68849794	69123249	ENSCHIG00000020176	ST7
4	75828673	75944390	ENSCHIG00000019474	ARMC10
5	7077874	7464731	ENSCHIG00000012255	NAV3
5	17951263	18151736	ENSCHIG00000025211	KITLG
5	23042666	23056712	ENSCHIG00000014921	MRPL42
5	23232893	23427705	ENSCHIG00000023376	CRADD
5	27496260	27503377	ENSCHIG00000001486
5	27505741	27507997	ENSCHIG00000017209	ATG101
5	28704845	28734312	ENSCHIG00000023016	TMPRSS12
5	56912119	56938458	ENSCHIG00000023587	ITGA7
5	56935920	56938458	ENSCHIG00000027137	METTL7B
5	65197017	65197123	ENSCHIG00000005663	RF00026
5	65262850	65371692	ENSCHIG00000018129	PAH
5	68567436	68740232	ENSCHIG00000022571	RFX4
5	77378506	77443774	ENSCHIG00000022393	IPO8
5	97341457	97387095	ENSCHIG00000001654
5	106508763	106633917	ENSCHIG00000012104	WNK1
5	109704451	109730966	ENSCHIG00000018332	SYNGR1
6	14114591	14177809	ENSCHIG00000007265
6	46065702	46306939	ENSCHIG00000022041	RBPJ
6	86608459	86703074	ENSCHIG00000004465	RUFY3
6	86720922	86732816	ENSCHIG00000021580	GRSF1
6	88713933	88880529	ENSCHIG00000018404	ANKRD17
6	95418805	95444717	ENSCHIG00000024886	FGF5
6	95681149	95682034	ENSCHIG00000018831
6	116842365	116945069	ENSCHIG00000026634	HTT
6	117246776	117260461	ENSCHIG00000025809	IDUA
6	117256235	117258753	ENSCHIG00000004233	SLC26A1
7	768791	773371	ENSCHIG00000021399
7	48531973	48611109	ENSCHIG00000017289	NDST1
7	49102493	49104446	ENSCHIG00000026767	TIGD6
7	62735182	62875162	ENSCHIG00000013534	TRPC7
7	66898830	66902627	ENSCHIG00000014151	POLR2E
7	66906700	66918974	ENSCHIG00000015532	ARHGAP45
7	66920634	66937537	ENSCHIG00000023165	ABCA7
7	66981853	67013587	ENSCHIG00000017186	ARID3A
7	67069282	67071545	ENSCHIG00000025832	ELANE
7	67075366	67078639	ENSCHIG00000014480	PRTN3
7	89679784	89694308	ENSCHIG00000021466	ZNF554
7	94711215	94717822	ENSCHIG00000024600	ICAM5
7	94721925	94726921	ENSCHIG00000017287	ZGLP1
7	94725471	94729464	ENSCHIG00000026261	FDX2
7	96663301	96667007	ENSCHIG00000023424	DNAJB1
8	39768421	39844867	ENSCHIG00000018337	SLC1A1
8	61662593	61800345	ENSCHIG00000025388	SHB
8	72201697	72479513	ENSCHIG00000001085	DOCK5
8	105354768	106375570	ENSCHIG00000000737	ASTN2
9	12499250	12560447	ENSCHIG00000020274	TRMT11
9	26496413	26607958	ENSCHIG00000023773	SLC16A10
9	27692334	27859641	ENSCHIG00000015141	FIG4
9	29902764	30181816	ENSCHIG00000015163	PDSS2
9	32423385	32532884	ENSCHIG00000025754	HACE1
9	32474638	32480698	ENSCHIG00000025858
9	60955048	61314992	ENSCHIG00000026148	PDE7B
9	78186489	78344569	ENSCHIG00000004099	IPCEF1
10	16245465	16251358	ENSCHIG00000013593	LOC102188051
10	21886226	21933153	ENSCHIG00000017815	SLC39A9
10	62723856	63152843	ENSCHIG00000014808	MDGA2
10	80580656	80594974	ENSCHIG00000020735	ADCY4
10	80598409	80600305	ENSCHIG00000016552
10	80625483	80634497	ENSCHIG00000024116	NFATC4
10	80659080	80678301	ENSCHIG00000017197	NYNRIN
10	82392953	82577244	ENSCHIG00000011581	MYO9A
10	92625430	92882228	ENSCHIG00000023152	PDE8B
10	94236911	94323019	ENSCHIG00000008105	POLK
10	94322997	94471710	ENSCHIG00000021950	COL4A3BP
10	94591783	94591875	ENSCHIG00000004701	RF00322
10	94634553	94672469	ENSCHIG00000021264
11	12777405	13002585	ENSCHIG00000007595	DYSF
11	28318730	28410417	ENSCHIG00000016866	EPAS1
11	45698244	45739585	ENSCHIG00000004632
11	71580180	71651349	ENSCHIG00000013719	RBKS
11	73172635	73206275	ENSCHIG00000005084	KIF3C
11	73289108	73354899	ENSCHIG00000023616	ASXL2
11	94640045	94660875	ENSCHIG00000024662	LHX2
11	105786567	105870838	ENSCHIG00000024860	PNPLA7
12	50114390	50230030	ENSCHIG00000026716	RNF17
12	57458789	57505444	ENSCHIG00000007689	RXFP2
12	57722045	57968420	ENSCHIG00000018326	FRY
13	22144589	22357614	ENSCHIG00000010933	MLLT10
13	22361083	22412647	ENSCHIG00000001876
13	22368536	22557435	ENSCHIG00000008531	DNAJC1
13	32767129	32882453	ENSCHIG00000024718	ARHGAP12
13	37954351	37986202	ENSCHIG00000016382	SEC23B
13	40209997	40210454	ENSCHIG00000003263
13	40260236	40269066	ENSCHIG00000025250	PAX1
13	53002635	53035318	ENSCHIG00000000961	MYT1
13	61110190	61197682	ENSCHIG00000025369	ASXL1
13	62545184	62679020	ENSCHIG00000017263	CBFA2T2
13	63263617	63280635	ENSCHIG00000026741	AHCY
13	63501243	63594625	ENSCHIG00000024810	PIGU
13	65581964	65641120	ENSCHIG00000010137	RBL1
13	72299486	72312198	ENSCHIG00000025978	R3HDML
13	73240045	73240928	ENSCHIG00000011519	LOC102174856
14	16431338	16744355	ENSCHIG00000010771	STK3
14	17758452	17759625	ENSCHIG00000016789
14	33155061	33429202	ENSCHIG00000015490	TRPS1
14	40222915	40238711	ENSCHIG00000022780	PKIA
14	94080743	94297588	ENSCHIG00000018348	KCNQ5
15	39485068	39983128	ENSCHIG00000019548	SBF2
15	45814360	46531484	ENSCHIG00000021925	SOX6
15	60808620	60839233	ENSCHIG00000022867	C11orf53
15	64495847	64547214	ENSCHIG00000016984	NPAT
16	4302063	4360464	ENSCHIG00000022712	C4BPA
16	24602793	24657633	ENSCHIG00000020148	MIA3
16	26597510	26999792	ENSCHIG00000021801	DNAH14
16	31887822	32154225	ENSCHIG00000025145	AKT3
16	33716250	33782176	ENSCHIG00000018212	KMO
16	37786097	38414205	ENSCHIG00000010364	DNM3
16	38416735	38452220	ENSCHIG00000016777	C1orf105
16	39697373	39956307	ENSCHIG00000023196	VPS13D
16	49259774	49314234	ENSCHIG00000012680	CFAP74
16	50536752	50543037	ENSCHIG00000024451	CTRC
16	79038000	79076978	ENSCHIG00000015356	IPO9
16	79086392	79112731	ENSCHIG00000007211	LMOD1
16	79116999	79127607	ENSCHIG00000010947	TIMM17A
17	772519	772625	ENSCHIG00000004064	RF00026
17	1930340	1958679	ENSCHIG00000017979	TBC1D10A
17	3122641	3194322	ENSCHIG00000007001
17	12308703	12588074	ENSCHIG00000017300	MED13L
17	17726598	17752096	ENSCHIG00000013406	SETD1B
17	18025800	18045621	ENSCHIG00000020553	LRRC43
17	18049688	18050761	ENSCHIG00000008919	B3GNT4
17	18075119	18104901	ENSCHIG00000017349	VPS33A
17	19008961	19036985	ENSCHIG00000006455	RILPL2
17	19426977	19467316	ENSCHIG00000013573	CCDC92
17	19753091	19909059	ENSCHIG00000009383	NCOR2
17	54070851	54346537	ENSCHIG00000025485	RNF150
18	3315798	3347959	ENSCHIG00000014158	RFWD3
18	3356599	3381374	ENSCHIG00000019391	MLKL
18	14541521	14616061	ENSCHIG00000019663	JPH3
18	15864498	15885405	ENSCHIG00000015886	SPG7
18	15968206	15974866	ENSCHIG00000009612	CDK10
18	15975821	15979637	ENSCHIG00000017204	SPATA2L
18	15983075	15992098	ENSCHIG00000025705	VPS9D1
18	22271231	22303135	ENSCHIG00000025912	VPS35
18	24898159	24911747	ENSCHIG00000004275
18	25811029	25917448	ENSCHIG00000004288
18	26107349	26134191	ENSCHIG00000025848	LOC102188340
18	26158111	26261951	ENSCHIG00000021821	NUP93
18	26273622	26273704	ENSCHIG00000002389	MIR138-2
18	26277672	26316261	ENSCHIG00000022546	SLC12A3
18	36947431	36982624	ENSCHIG00000009548	PRMT7
18	36952473	36952601	ENSCHIG00000003662	RF00413
18	37390901	37572006	ENSCHIG00000015934	TANGO6
18	46863287	46875879	ENSCHIG00000022411	CD22
18	55204669	55266425	ENSCHIG00000026570	SAE1
19	20966071	20990602	ENSCHIG00000005351
19	35243715	35248004	ENSCHIG00000017720	NME1
19	35294503	35447586	ENSCHIG00000023293	SPAG9
19	45520398	45642831	ENSCHIG00000026221	MAPT
19	45645775	45768984	ENSCHIG00000023974	KANSL1
19	45834798	45874152	ENSCHIG00000019893	CDC27
19	49336218	49480133	ENSCHIG00000019855	TBCD
19	54992752	55006603	ENSCHIG00000023322	UNC13D
19	55009382	55040408	ENSCHIG00000015385	UNK
20	22076627	22112448	ENSCHIG00000009727	GPBP1
20	38338812	38530069	ENSCHIG00000027077	SPEF2
20	39296918	39440853	ENSCHIG00000021456	RAI14
20	40868118	40946344	ENSCHIG00000024211	NPR3
21	64219449	64366877	ENSCHIG00000010594	EVL
22	16952610	16993508	ENSCHIG00000025966	SETD5
22	43860514	43920017	ENSCHIG00000026102	IL17RD
23	5024787	5080888	ENSCHIG00000018356	SYCP2L
23	7436060	7443773	ENSCHIG00000007624
23	16631209	16640460	ENSCHIG00000023169	NRN1
23	16707910	16848227	ENSCHIG00000020633	F13A1
23	29926098	30269982	ENSCHIG00000016080	RUNX2
23	30223998	30622231	ENSCHIG00000016615	SUPT3H
23	33100773	33106477	ENSCHIG00000026950	CCND3
23	33109130	33118404	ENSCHIG00000017590	BYSL
24	23154148	23619948	ENSCHIG00000000136	NOL4
24	23284784	23285111	ENSCHIG00000006480	RF00100
24	25006472	25238535	ENSCHIG00000000390	GAREM1
24	25839818	25840993	ENSCHIG00000000461
24	25850729	25859106	ENSCHIG00000009995	TTR
24	25908743	25958342	ENSCHIG00000016271	DSG2
24	25976355	26008273	ENSCHIG00000021842	DSG3
24	26035004	26074386	ENSCHIG00000024819	DSG4
24	33302064	33355677	ENSCHIG00000018673	ANKRD29
24	52416425	53229521	ENSCHIG00000025162	DCC
24	62123587	62141507	ENSCHIG00000020122	SERPINB11
25	1098302	1152682	ENSCHIG00000017137	IFT140
25	1157561	1196149	ENSCHIG00000001484	CRAMP1
25	9230203	9249592	ENSCHIG00000005097
25	19730683	19783438	ENSCHIG00000013729	VWA3A
25	19764138	19764245	ENSCHIG00000002606	RF00026
25	25876055	25879758	ENSCHIG00000020583	TUFM
25	25918204	25938944	ENSCHIG00000024795	LOC102182187
25	25952146	25963707	ENSCHIG00000020622	CLN3
25	25963706	25969255	ENSCHIG00000021439	APOBR
25	25970213	25975275	ENSCHIG00000010751	IL27
25	25989288	25991854	ENSCHIG00000017378	NUPR1
25	35511499	35516561	ENSCHIG00000010053	ORAI2
25	37407075	37513125	ENSCHIG00000009100	LOC102191297
26	2764589	2881434	ENSCHIG00000019232	EBF3
26	30497459	30521577	ENSCHIG00000022368	CWF19L1
26	30524784	30564452	ENSCHIG00000017053	CHUK
26	30741172	30820790	ENSCHIG00000012404	DNMBP
26	41892624	41987770	ENSCHIG00000006638	PTEN
26	42034618	42068875	ENSCHIG00000020310	ATAD1
26	42079097	42114695	ENSCHIG00000013444	PAPSS2
27	3764600	4200125	ENSCHIG00000022036	THRB
29	45042980	45051473	ENSCHIG00000020952	RBM14
29	45082310	45090326	ENSCHIG00000008907	RBM4B
29	47948684	47958855	ENSCHIG00000016576	ORAOV1
29	49484233	49555022	ENSCHIG00000024291	OSBPL5
