# Supplementary material for: Comparative genome analyses reveal the unique genetic composition and selection signals underlying the phenotypic characteristics of three Chinese domestic goat breeds
Source: Genet Sel Evol. 2019 Nov 26;51:70. doi: 10.1186/s12711-019-0512-4 (PMC6880376; doi:10.1186/s12711-019-0512-4)
Supplement: Supplementary file 16 — Additional file 16: Table S12. Summary of SNVs in four examples of selection signals detected in Tibetan Cashmere and Jintang Black goats. [file 12711_2019_512_MOESM16_ESM.xlsx]

## Sheet: List
Table S12 Summary of SNVs in four examples of selection signals detected in Tibetan Cashmere and Jintang Black goats
Table S12-1 Summary of SNVs in the selection signal encompassing FGF5 in Tibetan Cashmere goats
Table S12-2 Summary of SNVs in the selection signal encompassing three DSG family genes in Tibetan Cashmere goats
Table S12-3 Summary of SNVs in the selection signal encompassing KITLG in Tibetan Cashmere goats
Table S12-4 Summary of SNVs in the selection signal encompassing ASIP in Jintang Black goats

## Sheet: S12-1
Table S12-1 Summary of SNVs in the selection signal encompassing FGF5 in Tibetan Cashmere goats
Types of SNVs	CHR	POS	REF	ALT	Region	Gene	Mean FST
SNPs	6	95410062	C	T	intergenic_region	PRDM8-FGF5	0.0397683
SNPs	6	95410183	A	G	intergenic_region	PRDM8-FGF5	0.0101595
SNPs	6	95410475	G	A	intergenic_region	PRDM8-FGF5	0.123522
SNPs	6	95410652	T	C	intergenic_region	PRDM8-FGF5	0.0388934
SNPs	6	95411103	T	C	intergenic_region	PRDM8-FGF5	0.386922
SNPs	6	95411242	C	T	intergenic_region	PRDM8-FGF5	0.513541
SNPs	6	95411341	T	A	intergenic_region	PRDM8-FGF5	0.13796
SNPs	6	95411938	A	G	intergenic_region	PRDM8-FGF5	0.369348
SNPs	6	95412417	G	C	intergenic_region	PRDM8-FGF5	0.15087
SNPs	6	95412458	G	A	intergenic_region	PRDM8-FGF5	0.718489
SNPs	6	95413247	A	G	intergenic_region	PRDM8-FGF5	0.130404
SNPs	6	95413570	G	A	intergenic_region	PRDM8-FGF5	0.0888327
SNPs	6	95414109	G	A	upstream_gene_variant	FGF5	0.350641
SNPs	6	95414452	T	C	upstream_gene_variant	FGF5	-0.0265295
SNPs	6	95414646	G	A	upstream_gene_variant	FGF5	0.125842
SNPs	6	95414842	C	T	upstream_gene_variant	FGF5	0.284594
SNPs	6	95415003	A	G	upstream_gene_variant	FGF5	0.579331
SNPs	6	95415067	T	C	upstream_gene_variant	FGF5	0.158404
SNPs	6	95415468	T	C	upstream_gene_variant	FGF5	0.681732
SNPs	6	95415754	C	T	upstream_gene_variant	FGF5	0.0371882
SNPs	6	95415898	C	G	upstream_gene_variant	FGF5	0.127061
SNPs	6	95415948	C	T	upstream_gene_variant	FGF5	0.547314
SNPs	6	95416783	C	T	upstream_gene_variant	FGF5	0.489606
SNPs	6	95417232	G	A	upstream_gene_variant	FGF5	0.0374046
SNPs	6	95417721	C	T	upstream_gene_variant	FGF5	0.0522394
SNPs	6	95417894	T	C	upstream_gene_variant	FGF5	0.301228
SNPs	6	95418249	T	C	upstream_gene_variant	FGF5	0.0367791
SNPs	6	95418266	G	T	upstream_gene_variant	FGF5	0.449205
SNPs	6	95418366	A	C	upstream_gene_variant	FGF5	0.274384
SNPs	6	95418515	T	G	upstream_gene_variant	FGF5	0.120012
SNPs	6	95418561	G	T	upstream_gene_variant	FGF5	0.517252
SNPs	6	95418593	G	A	upstream_gene_variant	FGF5	0.445621
SNPs	6	95418992	G	A	5_prime_UTR_premature_start_codon_gain_variant	FGF5	0.656301
SNPs	6	95419200	G	A	5_prime_UTR_variant	FGF5	0.40925
SNPs	6	95419517	T	C	synonymous_variant	FGF5	0.189238
SNPs	6	95419805	A	G	intron_variant	FGF5	0.125842
SNPs	6	95419840	C	T	intron_variant	FGF5	0.178641
SNPs	6	95420015	C	T	intron_variant	FGF5	0.154005
SNPs	6	95420050	A	G	intron_variant	FGF5	0.24743
SNPs	6	95420172	C	T	intron_variant	FGF5	0.06291
SNPs	6	95420279	G	A	intron_variant	FGF5	0.0682849
SNPs	6	95420767	G	A	intron_variant	FGF5	0.336723
SNPs	6	95420963	C	T	intron_variant	FGF5	0.397987
SNPs	6	95421063	G	C	intron_variant	FGF5	0.138105
SNPs	6	95421200	A	G	intron_variant	FGF5	-0.00715536
SNPs	6	95421420	T	C	intron_variant	FGF5	0.245354
SNPs	6	95421463	G	A	intron_variant	FGF5	0.288157
SNPs	6	95421662	G	A	intron_variant	FGF5	0.282051
SNPs	6	95421838	A	G	intron_variant	FGF5	0.603389
SNPs	6	95422419	G	A	intron_variant	FGF5	0.112671
SNPs	6	95422538	G	A	intron_variant	FGF5	0.122428
SNPs	6	95422963	T	C	intron_variant	FGF5	0.129068
SNPs	6	95423024	A	T	intron_variant	FGF5	0.47367
SNPs	6	95423250	G	T	intron_variant	FGF5	0.598557
SNPs	6	95423405	A	G	intron_variant	FGF5	0.568362
SNPs	6	95423699	G	A	intron_variant	FGF5	0.505316
SNPs	6	95423732	G	A	intron_variant	FGF5	0.460637
SNPs	6	95423764	A	T	intron_variant	FGF5	0.320048
SNPs	6	95423930	T	C	intron_variant	FGF5	0.815674
SNPs	6	95424440	G	C	intron_variant	FGF5	0.185281
SNPs	6	95424443	A	G	intron_variant	FGF5	0.355209
SNPs	6	95424495	C	T	intron_variant	FGF5	0.0633635
SNPs	6	95424951	T	C	intron_variant	FGF5	0.063717
SNPs	6	95425830	G	A	intron_variant	FGF5	0.670306
SNPs	6	95426069	A	T	intron_variant	FGF5	0.62719
SNPs	6	95426138	A	G	intron_variant	FGF5	0.719913
SNPs	6	95426147	T	C	intron_variant	FGF5	0.370774
SNPs	6	95426460	T	G	intron_variant	FGF5	0.0552791
SNPs	6	95427095	A	T	intron_variant	FGF5	0.501824
SNPs	6	95427346	A	C	intron_variant	FGF5	0.458249
SNPs	6	95427349	T	C	intron_variant	FGF5	0.125842
SNPs	6	95427509	A	G	synonymous_variant	FGF5	0.232205
SNPs	6	95427841	A	G	intron_variant	FGF5	0.184569
SNPs	6	95428154	C	A	intron_variant	FGF5	0.741584
SNPs	6	95428738	A	G	intron_variant	FGF5	0.259723
SNPs	6	95428936	A	G	intron_variant	FGF5	0.04401
SNPs	6	95429375	T	C	intron_variant	FGF5	0.129068
SNPs	6	95429764	T	C	intron_variant	FGF5	0.138105
SNPs	6	95430697	G	A	intron_variant	FGF5	0.06291
SNPs	6	95431215	C	T	intron_variant	FGF5	0.200033
SNPs	6	95431376	T	C	intron_variant	FGF5	0.16027
SNPs	6	95431921	C	T	intron_variant	FGF5	0.06291
SNPs	6	95432005	A	G	intron_variant	FGF5	0.0579666
SNPs	6	95432424	G	A	intron_variant	FGF5	0.471253
SNPs	6	95432547	T	C	intron_variant	FGF5	0.173189
SNPs	6	95433025	C	T	intron_variant	FGF5	0.125842
SNPs	6	95434049	G	A	intron_variant	FGF5	0.189709
SNPs	6	95434436	G	C	intron_variant	FGF5	0.41761
SNPs	6	95434670	T	C	intron_variant	FGF5	0.504272
SNPs	6	95434701	G	T	intron_variant	FGF5	0.533992
SNPs	6	95435115	G	A	intron_variant	FGF5	0.385143
SNPs	6	95435392	C	T	intron_variant	FGF5	0.495019
SNPs	6	95435555	G	A	intron_variant	FGF5	0.160104
SNPs	6	95435641	C	T	intron_variant	FGF5	0.510319
SNPs	6	95435677	T	C	intron_variant	FGF5	0.511252
SNPs	6	95435683	C	T	intron_variant	FGF5	0.06291
SNPs	6	95435737	C	G	intron_variant	FGF5	0.68397
SNPs	6	95435818	C	A	intron_variant	FGF5	0.504857
SNPs	6	95435891	A	G	intron_variant	FGF5	0.606355
SNPs	6	95436163	A	G	intron_variant	FGF5	0.628937
SNPs	6	95436268	G	T	intron_variant	FGF5	0.06291
SNPs	6	95436600	T	C	intron_variant	FGF5	0.484214
SNPs	6	95436807	A	C	intron_variant	FGF5	0.19012
SNPs	6	95436894	A	G	intron_variant	FGF5	0.19012
SNPs	6	95437456	T	C	intron_variant	FGF5	0.083307
SNPs	6	95437546	C	A	intron_variant	FGF5	0.500542
SNPs	6	95437562	G	A	intron_variant	FGF5	0.608868
SNPs	6	95437593	A	G	intron_variant	FGF5	0.290779
SNPs	6	95437774	A	G,C	intron_variant	FGF5	0.0474104
SNPs	6	95437823	C	T	intron_variant	FGF5	0.218706
SNPs	6	95437840	A	G	intron_variant	FGF5	0.449206
SNPs	6	95438047	G	C	intron_variant	FGF5	0.0674152
SNPs	6	95438248	G	C	intron_variant	FGF5	0.162601
SNPs	6	95438288	C	T	intron_variant	FGF5	0.231404
SNPs	6	95438535	C	G	intron_variant	FGF5	-0.0100405
SNPs	6	95438568	A	G	intron_variant	FGF5	0.100344
SNPs	6	95438964	G	A	intron_variant	FGF5	0.618736
SNPs	6	95439211	G	A	intron_variant	FGF5	0.577049
SNPs	6	95439289	A	G	intron_variant	FGF5	0.465555
SNPs	6	95439345	A	G	intron_variant	FGF5	0.454861
SNPs	6	95439362	T	C	intron_variant	FGF5	0.170773
SNPs	6	95439369	A	G	intron_variant	FGF5	0.467733
SNPs	6	95439628	C	T	intron_variant	FGF5	0.467673
SNPs	6	95439651	G	A	intron_variant	FGF5	0.510028
SNPs	6	95440010	T	A	synonymous_variant	FGF5	0.38362
SNPs	6	95440185	T	G	3_prime_UTR_variant	FGF5	0.186973
SNPs	6	95440188	T	C	3_prime_UTR_variant	FGF5	0.384479
SNPs	6	95440427	A	G	3_prime_UTR_variant	FGF5	0.212524
SNPs	6	95441444	A	G	3_prime_UTR_variant	FGF5	0.527465
SNPs	6	95441484	T	C	3_prime_UTR_variant	FGF5	0.147237
SNPs	6	95441731	T	A	3_prime_UTR_variant	FGF5	0.15916
SNPs	6	95442117	C	T	3_prime_UTR_variant	FGF5	0.200059
SNPs	6	95442178	C	T	3_prime_UTR_variant	FGF5	-0.0090531
SNPs	6	95442325	C	T	3_prime_UTR_variant	FGF5	0.120324
SNPs	6	95442394	T	G	3_prime_UTR_variant	FGF5	0.487211
SNPs	6	95442678	G	T	3_prime_UTR_variant	FGF5	0.217143
SNPs	6	95442767	A	G	3_prime_UTR_variant	FGF5	0.220902
SNPs	6	95442957	C	T	3_prime_UTR_variant	FGF5	0.163368
SNPs	6	95443080	C	A	3_prime_UTR_variant	FGF5	0.806753
SNPs	6	95443334	C	G	3_prime_UTR_variant	FGF5	0.130346
SNPs	6	95443739	A	C	3_prime_UTR_variant	FGF5	0.0910417
SNPs	6	95443745	C	G	3_prime_UTR_variant	FGF5	0.161295
SNPs	6	95444046	C	T	3_prime_UTR_variant	FGF5	0.729201
SNPs	6	95444073	G	A	3_prime_UTR_variant	FGF5	0.550985
SNPs	6	95444201	T	C	3_prime_UTR_variant	FGF5	0.212524
SNPs	6	95444359	A	T	3_prime_UTR_variant	FGF5	0.140397
SNPs	6	95444458	C	T	3_prime_UTR_variant	FGF5	0.13633
SNPs	6	95444512	T	C	3_prime_UTR_variant	FGF5	0.11251
SNPs	6	95444551	G	A	3_prime_UTR_variant	FGF5	0.102606
SNPs	6	95444596	C	T	3_prime_UTR_variant	FGF5	0.3204
SNPs	6	95444597	C	T	3_prime_UTR_variant	FGF5	0.235421
SNPs	6	95444729	T	C	downstream_gene_variant	FGF5	0.203949
SNPs	6	95445216	T	A	downstream_gene_variant	FGF5	0.117891
SNPs	6	95445307	G	A	downstream_gene_variant	FGF5	0.187432
SNPs	6	95445630	G	A	downstream_gene_variant	FGF5	0.0833494
SNPs	6	95445681	C	T	downstream_gene_variant	FGF5	0.153454
SNPs	6	95446518	A	G	downstream_gene_variant	FGF5	0.0617262
SNPs	6	95446567	C	T	downstream_gene_variant	FGF5	0.337394
SNPs	6	95447170	A	G	downstream_gene_variant	FGF5	0.165521
SNPs	6	95447173	G	A	downstream_gene_variant	FGF5	0.170589
SNPs	6	95447244	A	G	downstream_gene_variant	FGF5	0.125028
SNPs	6	95447444	G	A	downstream_gene_variant	FGF5	0.195428
SNPs	6	95447453	A	G	downstream_gene_variant	FGF5	0.191294
SNPs	6	95447466	T	C	downstream_gene_variant	FGF5	0.175379
SNPs	6	95447499	T	C	downstream_gene_variant	FGF5	0.129699
SNPs	6	95447582	C	T	downstream_gene_variant	FGF5	0.160045
SNPs	6	95447589	T	C	downstream_gene_variant	FGF5	0.14838
SNPs	6	95447639	T	C	downstream_gene_variant	FGF5	0.158481
SNPs	6	95447810	C	T	downstream_gene_variant	FGF5	0.037726
SNPs	6	95447896	C	T	downstream_gene_variant	FGF5	0.149022
SNPs	6	95447968	T	C	downstream_gene_variant	FGF5	0.220583
SNPs	6	95448083	C	T	downstream_gene_variant	FGF5	0.16907
SNPs	6	95448486	C	T	downstream_gene_variant	FGF5	0.0989938
SNPs	6	95448643	G	T	downstream_gene_variant	FGF5	0.154659
SNPs	6	95448807	C	T	downstream_gene_variant	FGF5	0.0719548
SNPs	6	95449398	G	A	downstream_gene_variant	FGF5	0.148379
SNPs	6	95449924	A	G	intergenic_region	FGF5-ENSCHIG00000013260	0.178484
SNPs	6	95449940	T	C	intergenic_region	FGF5-ENSCHIG00000013260	0.189927
SNPs	6	95449955	G	A	intergenic_region	FGF5-ENSCHIG00000013260	0.193311
SNPs	6	95449958	T	C	intergenic_region	FGF5-ENSCHIG00000013260	0.193311
Indels	6	95410226	ACT	A	intergenic_region	PRDM8-FGF5
Indels	6	95411358	ACTGAG	A	intergenic_region	PRDM8-FGF5
Indels	6	95416850	G	GT	upstream_gene_variant	FGF5
Indels	6	95418702	AG	A	upstream_gene_variant	FGF5
Indels	6	95426458	CT	C	intron_variant	FGF5
Indels	6	95427310	T	TA	intron_variant	FGF5
Indels	6	95428523	CTT	C	intron_variant	FGF5
Indels	6	95433372	G	GAGTAGATTGCCTTTACC	intron_variant	FGF5
Indels	6	95436236	TA	T	intron_variant	FGF5
Indels	6	95439686	CCAAGA	C	intron_variant	FGF5
Indels	6	95441498	A	AGAT	3_prime_UTR_variant	FGF5
Indels	6	95442642	TTTACA	T	3_prime_UTR_variant	FGF5
Indels	6	95443661	GA	G	3_prime_UTR_variant	FGF5
Indels	6	95444589	TC	T	3_prime_UTR_variant	FGF5
Indels	6	95445241	G	GTA	downstream_gene_variant	FGF5
Indels	6	95445481	GAGAA	G	downstream_gene_variant	FGF5
Indels	6	95446336	T	TA	downstream_gene_variant	FGF5
Indels	6	95446460	GAC	G	downstream_gene_variant	FGF5

## Sheet: S12-2
Table S12-2 Summary of SNVs in the selection signal encompassing three DSG family genes in Tibetan Cashmere goats
Types of SNVs	CHR	POS	REF	ALT	Region	Gene	Mean FST
SNPs	24	25968524	T	G	intergenic_region	DSG2-DSG3	0.961054
SNPs	24	26019296	C	T	intergenic_region	DSG3-DSG4	0.958925
SNPs	24	25975463	C	T	downstream_gene_variant	DSG3	0.950983
SNPs	24	25987226	T	C	intron_variant	DSG3	0.950983
SNPs	24	25983780	A	G	intron_variant	DSG3	0.948835
SNPs	24	26007084	C	T	intron_variant	DSG3	0.948835
SNPs	24	25991911	G	A	intron_variant	DSG3	0.948649
SNPs	24	25984773	A	G	intron_variant	DSG3	0.946471
SNPs	24	26045976	G	A	intron_variant	DSG4	0.940709
SNPs	24	25957157	T	A	intron_variant	DSG2	0.922719
SNPs	24	25964298	C	A	intergenic_region	DSG2-DSG3	0.922443
SNPs	24	25964735	T	A	intergenic_region	DSG2-DSG3	0.922443
SNPs	24	25964741	T	C	intergenic_region	DSG2-DSG3	0.922443
SNPs	24	25977750	C	A	intron_variant	DSG3	0.922443
SNPs	24	25979565	T	C	intron_variant	DSG3	0.922443
SNPs	24	25984995	A	T	intron_variant	DSG3	0.922443
SNPs	24	25990264	C	T	intron_variant	DSG3	0.922443
SNPs	24	26008364	C	T	upstream_gene_variant	DSG3	0.922443
SNPs	24	25963341	G	A	upstream_gene_variant	DSG2	0.922103
SNPs	24	25984018	C	T	intron_variant	DSG3	0.919069
SNPs	24	25970776	G	A	intergenic_region	DSG2-DSG3	0.919032
SNPs	24	25981644	A	T	intron_variant	DSG3	0.911537
SNPs	24	25982211	C	T	synonymous_variant	DSG3	0.911537
SNPs	24	25982752	T	C	intron_variant	DSG3	0.911537
SNPs	24	25983075	G	A	intron_variant	DSG3	0.911537
SNPs	24	25984468	A	G	intron_variant	DSG3	0.911537
SNPs	24	25984994	C	T	intron_variant	DSG3	0.911537
SNPs	24	25985493	C	T	missense_variant	DSG3	0.911537
SNPs	24	25985494	G	C	missense_variant	DSG3	0.911537
SNPs	24	25987251	G	A	intron_variant	DSG3	0.911537
SNPs	24	25990050	G	A	synonymous_variant	DSG3	0.911537
SNPs	24	26002339	G	A	intron_variant	DSG3	0.911537
SNPs	24	26013648	G	A	intergenic_region	DSG3-DSG4	0.911537
SNPs	24	26018736	G	A	intergenic_region	DSG3-DSG4	0.911537
SNPs	24	26018772	G	A	intergenic_region	DSG3-DSG4	0.911197
SNPs	24	25998009	C	T	intron_variant	DSG3	0.911044
SNPs	24	25984359	G	T	intron_variant	DSG3	0.9076
SNPs	24	26005978	C	T	intron_variant	DSG3	0.9076
SNPs	24	26020491	T	G	intergenic_region	DSG3-DSG4	0.9076
SNPs	24	26026072	T	G	intergenic_region	DSG3-DSG4	0.907069
SNPs	24	25970825	G	A	intergenic_region	DSG2-DSG3	0.905453
SNPs	24	26018264	A	G	intergenic_region	DSG3-DSG4	0.90425
SNPs	24	25998415	C	T	intron_variant	DSG3	0.903246
SNPs	24	25983734	G	A	intron_variant	DSG3	0.900759
SNPs	24	26041006	C	T	synonymous_variant	DSG4	0.900416
SNPs	24	25988841	C	T	intron_variant	DSG3	0.899403
SNPs	24	26000400	C	T	intron_variant	DSG3	0.899403
SNPs	24	25979967	G	A	intron_variant	DSG3	0.895366
SNPs	24	26024154	G	A	intergenic_region	DSG3-DSG4	0.891658
SNPs	24	26031431	T	G	downstream_gene_variant	DSG4	0.889092
SNPs	24	26031485	C	A	downstream_gene_variant	DSG4	0.889092
SNPs	24	25983757	A	G	intron_variant	DSG3	0.888329
SNPs	24	26028274	T	A	intergenic_region	DSG3-DSG4	0.887276
SNPs	24	26024146	C	T	intergenic_region	DSG3-DSG4	0.885427
SNPs	24	25958109	G	T	intron_variant	DSG2	0.881095
SNPs	24	25965653	A	G	intergenic_region	DSG2-DSG3	0.880668
SNPs	24	26029216	A	G	intergenic_region	DSG3-DSG4	0.880458
SNPs	24	26019638	A	G	intergenic_region	DSG3-DSG4	0.879582
SNPs	24	26023649	A	G	intergenic_region	DSG3-DSG4	0.872465
SNPs	24	26026009	T	A	intergenic_region	DSG3-DSG4	0.870907
SNPs	24	26023272	G	A	intergenic_region	DSG3-DSG4	0.87049
SNPs	24	26064864	G	T	intron_variant	DSG4	0.869809
SNPs	24	25982039	C	G	intron_variant	DSG3	0.868902
SNPs	24	25982597	A	T	intron_variant	DSG3	0.868902
SNPs	24	25983355	A	G	intron_variant	DSG3	0.868902
SNPs	24	25984553	T	C	intron_variant	DSG3	0.868902
SNPs	24	26020763	G	A	intergenic_region	DSG3-DSG4	0.868902
SNPs	24	26012757	A	T	upstream_gene_variant	DSG3	0.866819
SNPs	24	25959013	C	T	upstream_gene_variant	DSG2	0.866801
SNPs	24	26034899	C	T	downstream_gene_variant	DSG4	0.864555
SNPs	24	26064364	T	C	intron_variant	DSG4	0.864502
SNPs	24	26024988	A	C	intergenic_region	DSG3-DSG4	0.863727
SNPs	24	26024991	A	T	intergenic_region	DSG3-DSG4	0.863727
SNPs	24	26031192	A	G	downstream_gene_variant	DSG4	0.860556
SNPs	24	26039185	G	A	intron_variant	DSG4	0.86006
SNPs	24	26028152	G	A	intergenic_region	DSG3-DSG4	0.858046
SNPs	24	26063766	C	T	intron_variant	DSG4	0.858037
SNPs	24	26030316	C	T	downstream_gene_variant	DSG4	0.856924
SNPs	24	26004768	A	G	intron_variant	DSG3	0.855045
SNPs	24	26027656	G	T	intergenic_region	DSG3-DSG4	0.851928
SNPs	24	26026153	G	A	intergenic_region	DSG3-DSG4	0.851522
SNPs	24	26030374	C	T	downstream_gene_variant	DSG4	0.85115
SNPs	24	26031704	A	C	downstream_gene_variant	DSG4	0.848462
SNPs	24	26032704	C	T	downstream_gene_variant	DSG4	0.848462
SNPs	24	26027278	G	A	intergenic_region	DSG3-DSG4	0.844883
SNPs	24	26024242	T	C	intergenic_region	DSG3-DSG4	0.843737
SNPs	24	26060303	C	T	intron_variant	DSG4	0.843048
SNPs	24	26025949	A	C	intergenic_region	DSG3-DSG4	0.842155
SNPs	24	26029248	A	C	intergenic_region	DSG3-DSG4	0.841664
SNPs	24	26029757	C	G	intergenic_region	DSG3-DSG4	0.839639
SNPs	24	26025881	C	T	intergenic_region	DSG3-DSG4	0.838369
SNPs	24	26019821	G	A	intergenic_region	DSG3-DSG4	0.837383
SNPs	24	25984383	C	A	intron_variant	DSG3	0.83726
SNPs	24	26028421	T	C	intergenic_region	DSG3-DSG4	0.836764
SNPs	24	26018262	A	G	intergenic_region	DSG3-DSG4	0.836613
SNPs	24	26026022	C	T	intergenic_region	DSG3-DSG4	0.835092
SNPs	24	26027618	A	T	intergenic_region	DSG3-DSG4	0.834377
SNPs	24	26026456	T	C	intergenic_region	DSG3-DSG4	0.833171
SNPs	24	26031223	A	C	downstream_gene_variant	DSG4	0.832822
SNPs	24	26041535	T	C	intron_variant	DSG4	0.832822
SNPs	24	25985569	C	T	missense_variant	DSG3	0.832389
SNPs	24	26058343	A	C	intron_variant	DSG4	0.829403
SNPs	24	26026447	C	T	intergenic_region	DSG3-DSG4	0.828111
SNPs	24	26026450	G	A	intergenic_region	DSG3-DSG4	0.828111
SNPs	24	26009314	A	C	upstream_gene_variant	DSG3	0.82637
SNPs	24	26028027	T	A	intergenic_region	DSG3-DSG4	0.82289
SNPs	24	26041648	G	A	intron_variant	DSG4	0.81961
SNPs	24	26038197	C	T	intron_variant	DSG4	0.817365
SNPs	24	25977296	G	A	intron_variant	DSG3	0.814111
SNPs	24	26028867	C	T	intergenic_region	DSG3-DSG4	0.814028
SNPs	24	26028874	C	T	intergenic_region	DSG3-DSG4	0.814028
SNPs	24	26028503	C	T	intergenic_region	DSG3-DSG4	0.813666
SNPs	24	26030129	C	T	downstream_gene_variant	DSG4	0.813666
SNPs	24	26021728	G	A	intergenic_region	DSG3-DSG4	0.812519
SNPs	24	26024184	G	A	intergenic_region	DSG3-DSG4	0.812396
SNPs	24	26024188	T	C	intergenic_region	DSG3-DSG4	0.812396
SNPs	24	26025050	A	T	intergenic_region	DSG3-DSG4	0.811132
SNPs	24	26024677	A	G	intergenic_region	DSG3-DSG4	0.81039
SNPs	24	26024683	A	C	intergenic_region	DSG3-DSG4	0.81039
SNPs	24	26036610	C	T	intron_variant	DSG4	0.809008
SNPs	24	26024962	A	G	intergenic_region	DSG3-DSG4	0.808968
SNPs	24	26028490	T	C	intergenic_region	DSG3-DSG4	0.808158
SNPs	24	26032347	T	C	downstream_gene_variant	DSG4	0.807727
SNPs	24	26024118	G	T	intergenic_region	DSG3-DSG4	0.806479
SNPs	24	26028322	T	A	intergenic_region	DSG3-DSG4	0.806233
SNPs	24	26036471	T	C	intron_variant	DSG4	0.805527
SNPs	24	26028260	T	C	intergenic_region	DSG3-DSG4	0.805056
SNPs	24	26023899	C	T	intergenic_region	DSG3-DSG4	0.804511
SNPs	24	26023980	C	G	intergenic_region	DSG3-DSG4	0.804511
SNPs	24	26023993	A	G	intergenic_region	DSG3-DSG4	0.804511
SNPs	24	26045242	G	A	intron_variant	DSG4	0.804511
SNPs	24	26036541	G	A	intron_variant	DSG4	0.803016
SNPs	24	26023044	A	G	intergenic_region	DSG3-DSG4	0.802737
SNPs	24	26027860	C	T	intergenic_region	DSG3-DSG4	0.80228
SNPs	24	26029875	A	G	intergenic_region	DSG3-DSG4	0.801573
SNPs	24	26030205	G	A	downstream_gene_variant	DSG4	0.801573
SNPs	24	26028341	G	A	intergenic_region	DSG3-DSG4	0.799548
SNPs	24	26028448	A	T	intergenic_region	DSG3-DSG4	0.799548
SNPs	24	26027590	A	T	intergenic_region	DSG3-DSG4	0.799508
SNPs	24	26027411	G	A	intergenic_region	DSG3-DSG4	0.79843
SNPs	24	26027413	A	C	intergenic_region	DSG3-DSG4	0.79843
SNPs	24	26024126	C	T	intergenic_region	DSG3-DSG4	0.797613
SNPs	24	26035891	C	T	intron_variant	DSG4	0.797242
SNPs	24	26027426	C	G	intergenic_region	DSG3-DSG4	0.794133
SNPs	24	26024106	A	T	intergenic_region	DSG3-DSG4	0.793674
SNPs	24	26024969	T	A	intergenic_region	DSG3-DSG4	0.793303
SNPs	24	26030536	C	T	downstream_gene_variant	DSG4	0.793286
SNPs	24	26030543	G	A	downstream_gene_variant	DSG4	0.793286
SNPs	24	26027817	T	C	intergenic_region	DSG3-DSG4	0.793284
SNPs	24	26027709	C	T	intergenic_region	DSG3-DSG4	0.792963
SNPs	24	26049105	C	T	intron_variant	DSG4	0.791685
SNPs	24	25992215	A	G	intron_variant	DSG3	0.791625
SNPs	24	26057003	G	A	intron_variant	DSG4	0.790324
SNPs	24	26041681	T	A	intron_variant	DSG4	0.788141
SNPs	24	26027479	G	A	intergenic_region	DSG3-DSG4	0.787548
SNPs	24	26029364	A	C	intergenic_region	DSG3-DSG4	0.787478
SNPs	24	26025277	T	G	intergenic_region	DSG3-DSG4	0.787301
SNPs	24	26028576	A	G	intergenic_region	DSG3-DSG4	0.787301
SNPs	24	26028586	A	G	intergenic_region	DSG3-DSG4	0.787301
SNPs	24	26028600	G	A	intergenic_region	DSG3-DSG4	0.787301
SNPs	24	26027427	A	G	intergenic_region	DSG3-DSG4	0.785155
SNPs	24	26034934	A	G	downstream_gene_variant	DSG4	0.783583
SNPs	24	26029198	T	C	intergenic_region	DSG3-DSG4	0.782323
SNPs	24	26022028	C	T	intergenic_region	DSG3-DSG4	0.780872
SNPs	24	26025202	G	A	intergenic_region	DSG3-DSG4	0.780716
SNPs	24	26025250	A	T	intergenic_region	DSG3-DSG4	0.780716
SNPs	24	26025258	T	G	intergenic_region	DSG3-DSG4	0.780716
SNPs	24	26025260	A	G	intergenic_region	DSG3-DSG4	0.780716
SNPs	24	26025267	G	A	intergenic_region	DSG3-DSG4	0.780716
SNPs	24	26027042	T	G	intergenic_region	DSG3-DSG4	0.780716
SNPs	24	26029293	G	A	intergenic_region	DSG3-DSG4	0.780716
SNPs	24	26029297	T	A	intergenic_region	DSG3-DSG4	0.780716
SNPs	24	26027494	A	G	intergenic_region	DSG3-DSG4	0.779512
SNPs	24	26057483	G	A	synonymous_variant	DSG4	0.778737
SNPs	24	26028174	T	A	intergenic_region	DSG3-DSG4	0.778221
SNPs	24	26026148	G	T	intergenic_region	DSG3-DSG4	0.776569
SNPs	24	26024938	T	C	intergenic_region	DSG3-DSG4	0.773641
SNPs	24	26025667	A	G	intergenic_region	DSG3-DSG4	0.772122
SNPs	24	26025672	G	A	intergenic_region	DSG3-DSG4	0.772122
SNPs	24	26025682	A	C	intergenic_region	DSG3-DSG4	0.772122
SNPs	24	26027159	G	A	intergenic_region	DSG3-DSG4	0.771567
SNPs	24	26025902	T	C	intergenic_region	DSG3-DSG4	0.769928
SNPs	24	26025224	T	C	intergenic_region	DSG3-DSG4	0.767055
SNPs	24	26038369	A	G	intron_variant	DSG4	0.766224
SNPs	24	26026125	T	G	intergenic_region	DSG3-DSG4	0.764675
SNPs	24	26026126	T	G	intergenic_region	DSG3-DSG4	0.764675
SNPs	24	26021709	T	C	intergenic_region	DSG3-DSG4	0.7646
SNPs	24	26025626	C	T	intergenic_region	DSG3-DSG4	0.763665
SNPs	24	26024720	C	T	intergenic_region	DSG3-DSG4	0.761773
SNPs	24	26024734	C	A	intergenic_region	DSG3-DSG4	0.761773
SNPs	24	26027349	G	A	intergenic_region	DSG3-DSG4	0.760822
SNPs	24	26026571	C	T	intergenic_region	DSG3-DSG4	0.760681
SNPs	24	26025937	G	A	intergenic_region	DSG3-DSG4	0.759268
SNPs	24	26029622	G	T	intergenic_region	DSG3-DSG4	0.753919
SNPs	24	26040139	G	A	intron_variant	DSG4	0.753088
SNPs	24	26024745	G	A	intergenic_region	DSG3-DSG4	0.752658
SNPs	24	25954826	G	A	intron_variant	DSG2	0.751261
SNPs	24	26040683	G	A	intron_variant	DSG4	0.751013
SNPs	24	26025373	T	C	intergenic_region	DSG3-DSG4	0.749242
SNPs	24	26028839	A	G	intergenic_region	DSG3-DSG4	0.747878
SNPs	24	26027331	C	T	intergenic_region	DSG3-DSG4	0.747868
SNPs	24	26039538	T	G	intron_variant	DSG4	0.747448
SNPs	24	26046836	A	G	intron_variant	DSG4	0.746862
SNPs	24	26024763	A	G	intergenic_region	DSG3-DSG4	0.745755
SNPs	24	26026341	T	C	intergenic_region	DSG3-DSG4	0.745755
SNPs	24	26057067	G	A	intron_variant	DSG4	0.741721
SNPs	24	26028831	G	A	intergenic_region	DSG3-DSG4	0.740381
SNPs	24	25953322	T	G	intron_variant	DSG2	0.740368
SNPs	24	26029573	G	A	intergenic_region	DSG3-DSG4	0.736083
SNPs	24	26029575	C	A	intergenic_region	DSG3-DSG4	0.736083
SNPs	24	26026737	T	C	intergenic_region	DSG3-DSG4	0.734085
SNPs	24	26028545	C	T	intergenic_region	DSG3-DSG4	0.7328
SNPs	24	26029327	C	T	intergenic_region	DSG3-DSG4	0.7328
SNPs	24	25954488	G	C	intron_variant	DSG2	0.732259
SNPs	24	26036909	C	G	intron_variant	DSG4	0.727385
SNPs	24	26034707	C	T	downstream_gene_variant	DSG4	0.723834
SNPs	24	26057231	G	T	intron_variant	DSG4	0.723511
SNPs	24	26038084	T	C	intron_variant	DSG4	0.722992
SNPs	24	26046241	T	C	intron_variant	DSG4	0.722865
SNPs	24	26051356	A	G	intron_variant	DSG4	0.722798
SNPs	24	26025577	C	G	intergenic_region	DSG3-DSG4	0.721988
SNPs	24	26025581	C	T	intergenic_region	DSG3-DSG4	0.721988
SNPs	24	26025586	G	A	intergenic_region	DSG3-DSG4	0.721988
SNPs	24	26029527	G	T	intergenic_region	DSG3-DSG4	0.718482
SNPs	24	26001445	T	G	intron_variant	DSG3	0.717437
SNPs	24	25953346	G	A	intron_variant	DSG2	0.715127
SNPs	24	26036448	T	C	intron_variant	DSG4	0.714461
SNPs	24	26043679	G	A	intron_variant	DSG4	0.712988
SNPs	24	26043777	G	A	intron_variant	DSG4	0.711718
SNPs	24	26038079	T	G	intron_variant	DSG4	0.711395
SNPs	24	25985315	C	G	intron_variant	DSG3	0.711313
SNPs	24	26040039	A	C	intron_variant	DSG4	0.709526
SNPs	24	26034098	A	C	downstream_gene_variant	DSG4	0.706299
SNPs	24	26027132	C	T	intergenic_region	DSG3-DSG4	0.706216
SNPs	24	26025338	A	G	intergenic_region	DSG3-DSG4	0.705083
SNPs	24	26057433	G	T	missense_variant	DSG4	0.702123
SNPs	24	26025558	A	T	intergenic_region	DSG3-DSG4	0.700908
SNPs	24	26038658	G	C	missense_variant	DSG4	0.696238
SNPs	24	26057080	G	A	intron_variant	DSG4	0.694739
SNPs	24	26026716	A	G	intergenic_region	DSG3-DSG4	0.688997
SNPs	24	25951692	G	T	intron_variant	DSG2	0.687983
SNPs	24	26024270	G	A	intergenic_region	DSG3-DSG4	0.686833
SNPs	24	26033661	G	A	downstream_gene_variant	DSG4	0.683942
SNPs	24	25951675	C	T	intron_variant	DSG2	0.680048
SNPs	24	26045621	T	C	intron_variant	DSG4	0.679661
SNPs	24	26038898	G	A	intron_variant	DSG4	0.67305
SNPs	24	26025484	C	T	intergenic_region	DSG3-DSG4	0.669823
SNPs	24	26033156	A	G	downstream_gene_variant	DSG4	0.669758
SNPs	24	26051413	C	T	intron_variant	DSG4	0.665675
SNPs	24	26039283	A	C	intron_variant	DSG4	0.66362
SNPs	24	26033738	C	A	downstream_gene_variant	DSG4	0.663204
SNPs	24	25958231	C	T	intron_variant	DSG2	0.66282
SNPs	24	26034811	T	A	downstream_gene_variant	DSG4	0.660964
SNPs	24	26044587	C	T	intron_variant	DSG4	0.658773
SNPs	24	26033418	A	G	downstream_gene_variant	DSG4	0.654173
SNPs	24	26047221	C	T	intron_variant	DSG4	0.654022
SNPs	24	26037758	A	G	intron_variant	DSG4	0.6536
SNPs	24	26038171	C	T	intron_variant	DSG4	0.652576
SNPs	24	26045655	T	A	intron_variant	DSG4	0.650713
SNPs	24	26032804	T	G	downstream_gene_variant	DSG4	0.64728
SNPs	24	25953839	T	C	intron_variant	DSG2	0.647131
SNPs	24	26033393	A	G	downstream_gene_variant	DSG4	0.646574
SNPs	24	26032237	C	T	downstream_gene_variant	DSG4	0.645326
SNPs	24	26039719	T	C	intron_variant	DSG4	0.644873
SNPs	24	26038774	C	T	synonymous_variant	DSG4	0.637416
SNPs	24	26032808	A	G	downstream_gene_variant	DSG4	0.636551
SNPs	24	26031906	T	C	downstream_gene_variant	DSG4	0.636485
SNPs	24	25960399	C	T	upstream_gene_variant	DSG2	0.63399
SNPs	24	26032705	A	G	downstream_gene_variant	DSG4	0.632813
SNPs	24	26038795	T	G	synonymous_variant	DSG4	0.630309
SNPs	24	26045348	G	A	intron_variant	DSG4	0.627239
SNPs	24	26032786	T	C	downstream_gene_variant	DSG4	0.625168
SNPs	24	25952399	G	A	intron_variant	DSG2	0.623481
SNPs	24	26045235	C	T	intron_variant	DSG4	0.617255
SNPs	24	26039611	T	G	intron_variant	DSG4	0.609922
SNPs	24	26032132	T	C	downstream_gene_variant	DSG4	0.60902
SNPs	24	26045463	G	A	intron_variant	DSG4	0.595744
SNPs	24	26032302	A	G	downstream_gene_variant	DSG4	0.595709
SNPs	24	26032304	A	G	downstream_gene_variant	DSG4	0.595709
SNPs	24	26033255	G	T	downstream_gene_variant	DSG4	0.595679
SNPs	24	25986747	G	T	intron_variant	DSG3	0.592604
SNPs	24	26037692	C	T	intron_variant	DSG4	0.586512
SNPs	24	26037703	A	G	intron_variant	DSG4	0.586512
SNPs	24	26034842	A	G	downstream_gene_variant	DSG4	0.585657
SNPs	24	26037532	A	G	intron_variant	DSG4	0.584742
SNPs	24	26062273	C	T	intron_variant	DSG4	0.576879
SNPs	24	26046020	C	G	intron_variant	DSG4	0.573275
SNPs	24	25951091	C	G	intron_variant	DSG2	0.572809
SNPs	24	26034192	G	A	downstream_gene_variant	DSG4	0.569733
SNPs	24	26031934	G	A	downstream_gene_variant	DSG4	0.568621
SNPs	24	25965043	G	A	intergenic_region	DSG2-DSG3	0.566607
SNPs	24	25997878	A	G	intron_variant	DSG3	0.561869
SNPs	24	26040342	C	T	intron_variant	DSG4	0.559229
SNPs	24	26063587	T	G	intron_variant	DSG4	0.558716
SNPs	24	26046167	T	C	intron_variant	DSG4	0.556256
SNPs	24	26046152	T	C	intron_variant	DSG4	0.555184
SNPs	24	25970975	G	A	intergenic_region	DSG2-DSG3	0.549467
SNPs	24	25991319	A	G	intron_variant	DSG3	0.548223
SNPs	24	26010676	A	C	upstream_gene_variant	DSG3	0.544076
SNPs	24	26045934	T	A	intron_variant	DSG4	0.543963
SNPs	24	26032631	A	G	downstream_gene_variant	DSG4	0.526761
SNPs	24	26032637	G	T	downstream_gene_variant	DSG4	0.526761
SNPs	24	26011791	C	T	upstream_gene_variant	DSG3	0.51885
SNPs	24	26020253	G	A	intergenic_region	DSG3-DSG4	0.518363
SNPs	24	26034795	G	A	downstream_gene_variant	DSG4	0.515189
SNPs	24	26057428	C	T	missense_variant	DSG4	0.512603
SNPs	24	26035788	C	A	intron_variant	DSG4	0.512119
SNPs	24	26049414	T	C	synonymous_variant	DSG4	0.511695
SNPs	24	26050113	C	A	intron_variant	DSG4	0.510433
SNPs	24	26046402	A	G	intron_variant	DSG4	0.507473
SNPs	24	25980454	G	A	intron_variant	DSG3	0.506544
SNPs	24	26060070	T	C	intron_variant	DSG4	0.503634
SNPs	24	26049107	C	T	intron_variant	DSG4	0.50045
SNPs	24	25986407	G	A	intron_variant	DSG3	0.498208
SNPs	24	26047087	T	C	intron_variant	DSG4	0.493593
SNPs	24	26016201	A	G	intergenic_region	DSG3-DSG4	0.493082
SNPs	24	25985680	A	G	intron_variant	DSG3	0.492919
SNPs	24	26028287	G	A	intergenic_region	DSG3-DSG4	0.48815
SNPs	24	25994244	C	T	intron_variant	DSG3	0.485628
SNPs	24	26046685	G	A	intron_variant	DSG4	0.4808
SNPs	24	26065577	G	A	intron_variant	DSG4	0.478922
SNPs	24	25987764	C	T	intron_variant	DSG3	0.477695
SNPs	24	25994648	T	C	intron_variant	DSG3	0.477695
SNPs	24	26069786	C	T	intron_variant	DSG4	0.476732
SNPs	24	26046616	G	C	intron_variant	DSG4	0.475689
SNPs	24	25978396	C	T	intron_variant	DSG3	0.471826
SNPs	24	26046627	T	C	intron_variant	DSG4	0.471681
SNPs	24	26066277	C	T	intron_variant	DSG4	0.464702
SNPs	24	26046652	T	C	intron_variant	DSG4	0.464623
SNPs	24	26023277	G	A	intergenic_region	DSG3-DSG4	0.463728
SNPs	24	26030737	T	C	downstream_gene_variant	DSG4	0.461442
SNPs	24	26019758	C	T	intergenic_region	DSG3-DSG4	0.461211
SNPs	24	26047396	A	G	intron_variant	DSG4	0.460731
SNPs	24	26065054	A	G	intron_variant	DSG4	0.459992
SNPs	24	26053851	A	G	intron_variant	DSG4	0.458464
SNPs	24	26066852	G	A	intron_variant	DSG4	0.457431
SNPs	24	26051995	C	T	intron_variant	DSG4	0.452225
SNPs	24	26029912	G	A	intergenic_region	DSG3-DSG4	0.44792
SNPs	24	26017297	C	T	intergenic_region	DSG3-DSG4	0.447699
SNPs	24	26016599	G	A	intergenic_region	DSG3-DSG4	0.447628
SNPs	24	26051687	G	A	intron_variant	DSG4	0.444971
SNPs	24	26015974	A	C	intergenic_region	DSG3-DSG4	0.440083
SNPs	24	26045462	T	C	intron_variant	DSG4	0.434647
SNPs	24	26017346	T	C	intergenic_region	DSG3-DSG4	0.43254
SNPs	24	26050255	C	T	intron_variant	DSG4	0.425774
SNPs	24	26046363	C	T	intron_variant	DSG4	0.425011
SNPs	24	26046269	T	C	intron_variant	DSG4	0.424681
SNPs	24	26044083	A	G	intron_variant	DSG4	0.422693
SNPs	24	26048465	T	G	intron_variant	DSG4	0.421934
SNPs	24	26023851	G	C	intergenic_region	DSG3-DSG4	0.421763
SNPs	24	26048525	G	A	intron_variant	DSG4	0.416003
SNPs	24	26004976	C	T	intron_variant	DSG3	0.415641
SNPs	24	26053651	A	T	intron_variant	DSG4	0.408531
SNPs	24	25990549	A	G	intron_variant	DSG3	0.404768
SNPs	24	26046305	A	G	intron_variant	DSG4	0.401801
SNPs	24	26046308	A	G	intron_variant	DSG4	0.401801
SNPs	24	26054770	A	G	intron_variant	DSG4	0.386036
SNPs	24	25987632	A	G	intron_variant	DSG3	0.383004
SNPs	24	26021715	T	C	intergenic_region	DSG3-DSG4	0.378658
SNPs	24	25987893	C	A	intron_variant	DSG3	0.375089
SNPs	24	26002183	T	A	intron_variant	DSG3	0.374213
SNPs	24	26008054	C	T	intron_variant	DSG3	0.374213
SNPs	24	26010031	C	A	upstream_gene_variant	DSG3	0.374213
SNPs	24	26013987	C	T	intergenic_region	DSG3-DSG4	0.374213
SNPs	24	26014201	A	G	intergenic_region	DSG3-DSG4	0.374213
SNPs	24	26020874	C	T	intergenic_region	DSG3-DSG4	0.374213
SNPs	24	25988191	T	C	intron_variant	DSG3	0.369401
SNPs	24	25987781	C	T	intron_variant	DSG3	0.369318
SNPs	24	25968896	G	A	intergenic_region	DSG2-DSG3	0.365725
SNPs	24	25987303	G	A	intron_variant	DSG3	0.361445
SNPs	24	25988241	C	G	intron_variant	DSG3	0.360197
SNPs	24	26024183	T	C	intergenic_region	DSG3-DSG4	0.355199
SNPs	24	25973104	C	T	downstream_gene_variant	DSG3	0.354769
SNPs	24	26013488	C	A	intergenic_region	DSG3-DSG4	0.353608
SNPs	24	26015162	G	T	intergenic_region	DSG3-DSG4	0.353608
SNPs	24	26013612	T	C	intergenic_region	DSG3-DSG4	0.352457
SNPs	24	26040853	T	C	intron_variant	DSG4	0.352401
SNPs	24	26068819	C	T	intron_variant	DSG4	0.350142
SNPs	24	25959477	C	T	upstream_gene_variant	DSG2	0.348663
SNPs	24	25979653	G	A	intron_variant	DSG3	0.346433
SNPs	24	25985733	A	G	intron_variant	DSG3	0.34491
SNPs	24	26021686	C	T	intergenic_region	DSG3-DSG4	0.344312
SNPs	24	25987734	T	C	intron_variant	DSG3	0.341786
SNPs	24	25986098	A	C	intron_variant	DSG3	0.340858
SNPs	24	26017435	T	G	intergenic_region	DSG3-DSG4	0.337651
SNPs	24	26018449	C	T	intergenic_region	DSG3-DSG4	0.337651
SNPs	24	25979139	A	T	intron_variant	DSG3	0.3369
SNPs	24	25965840	T	A	intergenic_region	DSG2-DSG3	0.336101
SNPs	24	25985942	G	A	intron_variant	DSG3	0.335138
SNPs	24	26034533	A	G	downstream_gene_variant	DSG4	0.333613
SNPs	24	25969108	T	C	intergenic_region	DSG2-DSG3	0.33225
SNPs	24	26028923	T	C	intergenic_region	DSG3-DSG4	0.330834
SNPs	24	25961628	A	G	upstream_gene_variant	DSG2	0.328789
SNPs	24	26069868	G	A	intron_variant	DSG4	0.326875
SNPs	24	26017471	C	T	intergenic_region	DSG3-DSG4	0.323536
SNPs	24	26068027	G	A	intron_variant	DSG4	0.321295
SNPs	24	25959918	G	C	upstream_gene_variant	DSG2	0.321059
SNPs	24	26060979	C	A	intron_variant	DSG4	0.319631
SNPs	24	26069825	G	A	intron_variant	DSG4	0.319631
SNPs	24	26069855	A	G	intron_variant	DSG4	0.319631
SNPs	24	25980796	C	T	intron_variant	DSG3	0.317397
SNPs	24	26022809	G	A	intergenic_region	DSG3-DSG4	0.317225
SNPs	24	26061158	G	C	intron_variant	DSG4	0.314232
SNPs	24	26068045	C	T	intron_variant	DSG4	0.314232
SNPs	24	26058619	C	T	intron_variant	DSG4	0.312702
SNPs	24	26062672	C	A	intron_variant	DSG4	0.312362
SNPs	24	26021584	G	A	intergenic_region	DSG3-DSG4	0.309148
SNPs	24	25952259	A	C	intron_variant	DSG2	0.306044
SNPs	24	26068512	A	T	intron_variant	DSG4	0.304141
SNPs	24	26067459	A	C	intron_variant	DSG4	0.30036
SNPs	24	26067747	C	T	intron_variant	DSG4	0.299928
SNPs	24	26067755	A	C	intron_variant	DSG4	0.299928
SNPs	24	26067778	T	C	intron_variant	DSG4	0.299928
SNPs	24	26058101	A	G	intron_variant	DSG4	0.299515
SNPs	24	26069778	C	T	intron_variant	DSG4	0.298137
SNPs	24	25965006	T	C	intergenic_region	DSG2-DSG3	0.298119
SNPs	24	26063564	C	G	intron_variant	DSG4	0.298058
SNPs	24	26009793	C	A	upstream_gene_variant	DSG3	0.297654
SNPs	24	26058334	C	A	intron_variant	DSG4	0.296673
SNPs	24	26067330	A	T	intron_variant	DSG4	0.296007
SNPs	24	26067337	G	C	intron_variant	DSG4	0.296007
SNPs	24	26067344	T	C	intron_variant	DSG4	0.296007
SNPs	24	26020730	C	T	intergenic_region	DSG3-DSG4	0.295417
SNPs	24	25973440	G	A	downstream_gene_variant	DSG3	0.295089
SNPs	24	26051827	A	G	intron_variant	DSG4	0.294914
SNPs	24	26008040	A	G	intron_variant	DSG3	0.293711
SNPs	24	26065087	G	T	intron_variant	DSG4	0.293403
SNPs	24	25986178	A	G	intron_variant	DSG3	0.292589
SNPs	24	25959235	A	G	upstream_gene_variant	DSG2	0.291023
SNPs	24	25965053	T	G	intergenic_region	DSG2-DSG3	0.290417
SNPs	24	25987313	C	T	intron_variant	DSG3	0.286664
SNPs	24	25958221	G	A	intron_variant	DSG2	0.284941
SNPs	24	26055922	C	T	intron_variant	DSG4	0.284089
SNPs	24	26056071	A	G	intron_variant	DSG4	0.283632
SNPs	24	26028387	C	T	intergenic_region	DSG3-DSG4	0.282383
SNPs	24	26065838	A	T	intron_variant	DSG4	0.282315
SNPs	24	26065856	T	C	intron_variant	DSG4	0.277522
SNPs	24	25960801	T	G	upstream_gene_variant	DSG2	0.276935
SNPs	24	25967052	G	A	intergenic_region	DSG2-DSG3	0.276682
SNPs	24	26066776	G	A	intron_variant	DSG4	0.275841
SNPs	24	25995278	C	T	intron_variant	DSG3	0.273664
SNPs	24	26065912	A	C	intron_variant	DSG4	0.272507
SNPs	24	25978381	C	G	intron_variant	DSG3	0.27129
SNPs	24	26065861	G	T	intron_variant	DSG4	0.268834
SNPs	24	25957136	G	A	intron_variant	DSG2	0.2686
SNPs	24	26021737	A	G	intergenic_region	DSG3-DSG4	0.268266
SNPs	24	25956495	C	T	intron_variant	DSG2	0.268133
SNPs	24	25999921	C	T	intron_variant	DSG3	0.267903
SNPs	24	25997477	A	G	intron_variant	DSG3	0.267754
SNPs	24	26046168	T	C	intron_variant	DSG4	0.267501
SNPs	24	26066664	G	A	intron_variant	DSG4	0.263925
SNPs	24	26010365	G	A	upstream_gene_variant	DSG3	0.263367
SNPs	24	26065846	A	C	intron_variant	DSG4	0.259708
SNPs	24	25980017	C	A	intron_variant	DSG3	0.259673
SNPs	24	25969495	G	T	intergenic_region	DSG2-DSG3	0.258756
SNPs	24	25982917	A	C	intron_variant	DSG3	0.256707
SNPs	24	25985809	C	T	intron_variant	DSG3	0.256424
SNPs	24	25977466	G	A	intron_variant	DSG3	0.256379
SNPs	24	26003286	C	T	intron_variant	DSG3	0.254258
SNPs	24	25985772	A	T	intron_variant	DSG3	0.25202
SNPs	24	26062201	C	T	splice_region_variant&intron_variant	DSG4	0.251446
SNPs	24	25982662	A	G	intron_variant	DSG3	0.251425
SNPs	24	26066377	C	A	intron_variant	DSG4	0.251404
SNPs	24	25964755	C	T	intergenic_region	DSG2-DSG3	0.25127
SNPs	24	25977063	C	T	intron_variant	DSG3	0.250154
SNPs	24	25990375	A	G	intron_variant	DSG3	0.250154
SNPs	24	26067585	A	G	intron_variant	DSG4	0.249706
SNPs	24	26068650	G	A	intron_variant	DSG4	0.248677
SNPs	24	25958492	C	G	upstream_gene_variant	DSG2	0.248297
SNPs	24	25974571	G	A	downstream_gene_variant	DSG3	0.247045
SNPs	24	25960556	A	G	upstream_gene_variant	DSG2	0.246737
SNPs	24	26063409	C	T	intron_variant	DSG4	0.246078
SNPs	24	26063412	A	G	intron_variant	DSG4	0.246078
SNPs	24	25956982	C	A	intron_variant	DSG2	0.244803
SNPs	24	25964071	C	T	intergenic_region	DSG2-DSG3	0.244221
SNPs	24	25959542	T	G	upstream_gene_variant	DSG2	0.244169
SNPs	24	26069612	A	T	intron_variant	DSG4	0.243883
SNPs	24	26002865	C	T	intron_variant	DSG3	0.242918
SNPs	24	26069300	C	T	intron_variant	DSG4	0.242287
SNPs	24	26069304	T	A	intron_variant	DSG4	0.242287
SNPs	24	25959228	G	A	upstream_gene_variant	DSG2	0.241979
SNPs	24	26007553	A	G	intron_variant	DSG3	0.241969
SNPs	24	26062089	A	G	intron_variant	DSG4	0.24069
SNPs	24	26067001	A	G	intron_variant	DSG4	0.24008
SNPs	24	26067041	C	A	intron_variant	DSG4	0.24008
SNPs	24	26066125	C	T	intron_variant	DSG4	0.239979
SNPs	24	26066652	G	A	intron_variant	DSG4	0.239874
SNPs	24	26006310	A	G	intron_variant	DSG3	0.239516
SNPs	24	25995160	T	A	intron_variant	DSG3	0.239497
SNPs	24	26068429	C	T	intron_variant	DSG4	0.239165
SNPs	24	26068431	A	G	intron_variant	DSG4	0.239165
SNPs	24	25959519	T	G	upstream_gene_variant	DSG2	0.238588
SNPs	24	26063715	C	T	intron_variant	DSG4	0.23847
SNPs	24	26000626	G	A	intron_variant	DSG3	0.237743
SNPs	24	26009059	G	A	upstream_gene_variant	DSG3	0.23751
SNPs	24	25991522	G	A	intron_variant	DSG3	0.237225
SNPs	24	26067285	T	A	intron_variant	DSG4	0.237182
SNPs	24	26067821	A	T	intron_variant	DSG4	0.23669
SNPs	24	25988704	G	C	intron_variant	DSG3	0.235357
SNPs	24	26067866	G	A	intron_variant	DSG4	0.234875
SNPs	24	26063322	G	A	intron_variant	DSG4	0.234495
SNPs	24	26066811	C	T	intron_variant	DSG4	0.23444
SNPs	24	25960085	T	A	upstream_gene_variant	DSG2	0.234281
SNPs	24	25960848	A	G	upstream_gene_variant	DSG2	0.233411
SNPs	24	26068115	A	T	intron_variant	DSG4	0.232887
SNPs	24	26069305	G	A	intron_variant	DSG4	0.232179
SNPs	24	26043155	T	C	intron_variant	DSG4	0.230379
SNPs	24	26068697	C	A	intron_variant	DSG4	0.230206
SNPs	24	26066530	G	A	intron_variant	DSG4	0.229607
SNPs	24	26066587	T	A	intron_variant	DSG4	0.229607
SNPs	24	26067804	A	G	intron_variant	DSG4	0.229607
SNPs	24	26067314	G	A	intron_variant	DSG4	0.227779
SNPs	24	25995183	G	A	intron_variant	DSG3	0.226577
SNPs	24	25984117	G	A	intron_variant	DSG3	0.224975
SNPs	24	26066850	G	A	intron_variant	DSG4	0.224935
SNPs	24	26061796	T	G	intron_variant	DSG4	0.224689
SNPs	24	26069137	G	A	intron_variant	DSG4	0.224626
SNPs	24	26069140	A	G	intron_variant	DSG4	0.224625
SNPs	24	25998209	T	C	intron_variant	DSG3	0.224399
SNPs	24	26029578	T	C	intergenic_region	DSG3-DSG4	0.223933
SNPs	24	25970042	A	G	intergenic_region	DSG2-DSG3	0.223239
SNPs	24	26039262	T	C	intron_variant	DSG4	0.223142
SNPs	24	26068106	G	A	intron_variant	DSG4	0.223135
SNPs	24	26007287	T	C	intron_variant	DSG3	0.222918
SNPs	24	26066294	G	A	intron_variant	DSG4	0.222407
SNPs	24	26006889	C	T	intron_variant	DSG3	0.22231
SNPs	24	26068894	C	T	intron_variant	DSG4	0.222059
SNPs	24	26069489	C	T	intron_variant	DSG4	0.221095
SNPs	24	26061818	C	T	intron_variant	DSG4	0.220599
SNPs	24	26007123	G	C	intron_variant	DSG3	0.220183
SNPs	24	26022522	C	A	intergenic_region	DSG3-DSG4	0.220137
SNPs	24	25996044	G	A	intron_variant	DSG3	0.219668
SNPs	24	26066617	A	G	intron_variant	DSG4	0.219068
SNPs	24	26060447	C	T	synonymous_variant	DSG4	0.218666
SNPs	24	26067847	C	T	intron_variant	DSG4	0.21849
SNPs	24	26061643	C	A	intron_variant	DSG4	0.217898
SNPs	24	26066150	A	G	intron_variant	DSG4	0.217191
SNPs	24	26066154	G	A	intron_variant	DSG4	0.217191
SNPs	24	26066316	T	C	intron_variant	DSG4	0.217154
SNPs	24	26069531	T	C	intron_variant	DSG4	0.216519
SNPs	24	26067255	C	T	intron_variant	DSG4	0.21626
SNPs	24	26068082	A	G	intron_variant	DSG4	0.216185
SNPs	24	25960076	A	G	upstream_gene_variant	DSG2	0.216143
SNPs	24	26069542	G	A	intron_variant	DSG4	0.215946
SNPs	24	25967314	T	C	intergenic_region	DSG2-DSG3	0.215589
SNPs	24	26066361	T	C	intron_variant	DSG4	0.215187
SNPs	24	26068915	C	G	intron_variant	DSG4	0.214591
SNPs	24	25984244	G	A	intron_variant	DSG3	0.214274
SNPs	24	26067210	C	T	intron_variant	DSG4	0.213663
SNPs	24	26057362	A	G	intron_variant	DSG4	0.213139
SNPs	24	25994940	C	G	intron_variant	DSG3	0.213006
SNPs	24	26067670	G	A	intron_variant	DSG4	0.212087
SNPs	24	26065324	C	T	intron_variant	DSG4	0.211814
SNPs	24	26022605	A	G	intergenic_region	DSG3-DSG4	0.211541
SNPs	24	25956875	C	A	intron_variant	DSG2	0.210559
SNPs	24	26069678	G	A	intron_variant	DSG4	0.210396
SNPs	24	26069994	C	T	intron_variant	DSG4	0.210146
SNPs	24	26006508	G	A	intron_variant	DSG3	0.209476
SNPs	24	26051209	G	A	intron_variant	DSG4	0.208022
SNPs	24	26064895	G	A	intron_variant	DSG4	0.206907
SNPs	24	26023622	C	T	intergenic_region	DSG3-DSG4	0.206692
SNPs	24	26012933	T	G	upstream_gene_variant	DSG3	0.205062
SNPs	24	25998855	A	G	intron_variant	DSG3	0.203211
SNPs	24	26060514	G	A	missense_variant	DSG4	0.203017
SNPs	24	26009743	A	G	upstream_gene_variant	DSG3	0.200776
SNPs	24	25964677	G	A	intergenic_region	DSG2-DSG3	0.196282
SNPs	24	25994952	G	A	intron_variant	DSG3	0.195903
SNPs	24	26003475	G	A	intron_variant	DSG3	0.195903
SNPs	24	25970711	A	C	intergenic_region	DSG2-DSG3	0.195525
SNPs	24	26022611	C	G	intergenic_region	DSG3-DSG4	0.194758
SNPs	24	25997610	A	C	intron_variant	DSG3	0.193837
SNPs	24	26005749	A	T	intron_variant	DSG3	0.191821
SNPs	24	25993496	C	T	intron_variant	DSG3	0.191122
SNPs	24	26025997	T	C	intergenic_region	DSG3-DSG4	0.190181
SNPs	24	26062098	G	A	intron_variant	DSG4	0.190011
SNPs	24	26006287	A	G	intron_variant	DSG3	0.189735
SNPs	24	26042759	T	C	intron_variant	DSG4	0.185752
SNPs	24	26006248	C	A	intron_variant	DSG3	0.184275
SNPs	24	25976688	C	T	synonymous_variant	DSG3	0.182834
SNPs	24	25997927	C	T	intron_variant	DSG3	0.180256
SNPs	24	25969940	T	A	intergenic_region	DSG2-DSG3	0.179712
SNPs	24	26024095	G	A	intergenic_region	DSG3-DSG4	0.178958
SNPs	24	26054801	T	A	intron_variant	DSG4	0.178705
SNPs	24	26020474	C	T	intergenic_region	DSG3-DSG4	0.17849
SNPs	24	26069025	G	C	intron_variant	DSG4	0.177889
SNPs	24	25977488	G	A	intron_variant	DSG3	0.177283
SNPs	24	26061269	C	G	intron_variant	DSG4	0.176676
SNPs	24	26035538	G	A	synonymous_variant	DSG4	0.175504
SNPs	24	26065553	A	G	intron_variant	DSG4	0.175229
SNPs	24	25979403	T	A	intron_variant	DSG3	0.175168
SNPs	24	26021267	A	G	intergenic_region	DSG3-DSG4	0.174782
SNPs	24	25960411	T	C	upstream_gene_variant	DSG2	0.174264
SNPs	24	25995301	A	G	intron_variant	DSG3	0.172841
SNPs	24	26027930	A	G	intergenic_region	DSG3-DSG4	0.172414
SNPs	24	25961154	A	G	upstream_gene_variant	DSG2	0.172354
SNPs	24	26021066	A	G	intergenic_region	DSG3-DSG4	0.172107
SNPs	24	26027707	T	C	intergenic_region	DSG3-DSG4	0.17178
SNPs	24	26020911	G	A	intergenic_region	DSG3-DSG4	0.171778
SNPs	24	25991490	G	T	intron_variant	DSG3	0.171641
SNPs	24	25970053	A	G	intergenic_region	DSG2-DSG3	0.171414
SNPs	24	26018798	C	T	intergenic_region	DSG3-DSG4	0.17054
SNPs	24	25978191	C	A	intron_variant	DSG3	0.170462
SNPs	24	26043920	A	T	intron_variant	DSG4	0.170198
SNPs	24	26066697	T	C	intron_variant	DSG4	0.169508
SNPs	24	26066698	G	A	intron_variant	DSG4	0.169508
SNPs	24	25963335	G	T	upstream_gene_variant	DSG2	0.168175
SNPs	24	26065573	C	T	intron_variant	DSG4	0.167827
SNPs	24	26065467	G	A	intron_variant	DSG4	0.167759
SNPs	24	26010288	T	A	upstream_gene_variant	DSG3	0.166604
SNPs	24	26010334	T	C	upstream_gene_variant	DSG3	0.166604
SNPs	24	26065383	G	A	intron_variant	DSG4	0.166269
SNPs	24	26006286	C	T	intron_variant	DSG3	0.165815
SNPs	24	25971970	G	A	downstream_gene_variant	DSG3	0.165693
SNPs	24	26066082	G	C	intron_variant	DSG4	0.165454
SNPs	24	26052326	G	A	intron_variant	DSG4	0.165274
SNPs	24	26022567	C	T	intergenic_region	DSG3-DSG4	0.163898
SNPs	24	25998609	C	T	intron_variant	DSG3	0.163551
SNPs	24	26066816	T	G	intron_variant	DSG4	0.163191
SNPs	24	25961957	G	A	upstream_gene_variant	DSG2	0.163031
SNPs	24	26065730	A	G	intron_variant	DSG4	0.162676
SNPs	24	25992553	A	G	intron_variant	DSG3	0.162245
SNPs	24	25954626	A	G	intron_variant	DSG2	0.161764
SNPs	24	26065448	C	A	intron_variant	DSG4	0.161099
SNPs	24	26065414	G	A	intron_variant	DSG4	0.160144
SNPs	24	25952677	T	C	intron_variant	DSG2	0.160067
SNPs	24	26065754	A	T	intron_variant	DSG4	0.159417
SNPs	24	26028622	G	T	intergenic_region	DSG3-DSG4	0.159273
SNPs	24	26065670	A	G	intron_variant	DSG4	0.158429
SNPs	24	26000486	G	T	intron_variant	DSG3	0.157314
SNPs	24	26004952	A	T	intron_variant	DSG3	0.156293
SNPs	24	26065603	G	A	intron_variant	DSG4	0.155893
SNPs	24	25967592	A	G	intergenic_region	DSG2-DSG3	0.155184
SNPs	24	26064608	C	T	intron_variant	DSG4	0.154005
SNPs	24	26014294	G	T	intergenic_region	DSG3-DSG4	0.153858
SNPs	24	26000559	G	A	intron_variant	DSG3	0.153053
SNPs	24	26000709	C	A	intron_variant	DSG3	0.153053
SNPs	24	26006007	G	A	intron_variant	DSG3	0.153053
SNPs	24	25988783	C	T	intron_variant	DSG3	0.152263
SNPs	24	26065645	G	A	intron_variant	DSG4	0.152075
SNPs	24	25995041	T	C	intron_variant	DSG3	0.151303
SNPs	24	26010837	A	G	upstream_gene_variant	DSG3	0.150856
SNPs	24	25953231	C	T	intron_variant	DSG2	0.149844
SNPs	24	26050607	A	G	intron_variant	DSG4	0.14863
SNPs	24	26065509	G	A	intron_variant	DSG4	0.148314
SNPs	24	26000798	G	A	intron_variant	DSG3	0.147839
SNPs	24	25955186	G	T	intron_variant	DSG2	0.147464
SNPs	24	25955192	T	C	intron_variant	DSG2	0.147464
SNPs	24	26008327	C	T	upstream_gene_variant	DSG3	0.146753
SNPs	24	25994471	T	C	intron_variant	DSG3	0.146698
SNPs	24	25987079	C	T	missense_variant	DSG3	0.146267
SNPs	24	25955082	A	G	intron_variant	DSG2	0.145708
SNPs	24	25958831	G	C	upstream_gene_variant	DSG2	0.145453
SNPs	24	26069203	A	G	intron_variant	DSG4	0.1449
SNPs	24	25997264	T	G	intron_variant	DSG3	0.144849
SNPs	24	25952317	A	C	intron_variant	DSG2	0.1445
SNPs	24	26027272	A	G	intergenic_region	DSG3-DSG4	0.144287
SNPs	24	25951730	C	G	intron_variant	DSG2	0.143073
SNPs	24	25997102	C	T	intron_variant	DSG3	0.142943
SNPs	24	26050749	A	T	intron_variant	DSG4	0.142361
SNPs	24	26044733	C	T	intron_variant	DSG4	0.140625
SNPs	24	26045433	A	T	intron_variant	DSG4	0.140438
SNPs	24	25955089	C	T	intron_variant	DSG2	0.139805
SNPs	24	25953254	T	C	intron_variant	DSG2	0.137667
SNPs	24	26037336	C	A	intron_variant	DSG4	0.137643
SNPs	24	25951784	G	A	intron_variant	DSG2	0.135002
SNPs	24	26040671	T	G	intron_variant	DSG4	0.134757
SNPs	24	26053006	A	T	intron_variant	DSG4	0.134201
SNPs	24	26039804	G	A	intron_variant	DSG4	0.134185
SNPs	24	25988360	G	A	intron_variant	DSG3	0.133151
SNPs	24	26050463	A	G	intron_variant	DSG4	0.132857
SNPs	24	25952926	G	A	intron_variant	DSG2	0.132135
SNPs	24	25972401	T	C	downstream_gene_variant	DSG3	0.131352
SNPs	24	25978066	C	T	intron_variant	DSG3	0.130295
SNPs	24	26041883	T	C	intron_variant	DSG4	0.129175
SNPs	24	26032554	T	C	downstream_gene_variant	DSG4	0.12331
SNPs	24	26032565	C	T	downstream_gene_variant	DSG4	0.12331
SNPs	24	26055196	A	G	intron_variant	DSG4	0.121872
SNPs	24	26055206	T	C	intron_variant	DSG4	0.121872
SNPs	24	26047699	A	T	intron_variant	DSG4	0.121583
SNPs	24	26050284	T	C	intron_variant	DSG4	0.121
SNPs	24	26054790	G	C	intron_variant	DSG4	0.120396
SNPs	24	25980748	G	A	intron_variant	DSG3	0.120171
SNPs	24	25986581	G	A	intron_variant	DSG3	0.119047
SNPs	24	26060855	C	T	intron_variant	DSG4	0.118249
SNPs	24	25950566	A	C	intron_variant	DSG2	0.116184
SNPs	24	26045274	G	A	intron_variant	DSG4	0.114104
SNPs	24	26051742	A	G	intron_variant	DSG4	0.114102
SNPs	24	26055044	T	C	missense_variant	DSG4	0.112836
SNPs	24	26015837	C	A	intergenic_region	DSG3-DSG4	0.111687
SNPs	24	26054382	A	G	intron_variant	DSG4	0.110455
SNPs	24	26063066	T	C	intron_variant	DSG4	0.110455
SNPs	24	26058863	T	A	intron_variant	DSG4	0.109825
SNPs	24	25980290	G	A	intron_variant	DSG3	0.109468
SNPs	24	26022539	A	G	intergenic_region	DSG3-DSG4	0.109458
SNPs	24	26047515	C	T	intron_variant	DSG4	0.108431
SNPs	24	26031522	G	A	downstream_gene_variant	DSG4	0.108384
SNPs	24	26046440	G	A	intron_variant	DSG4	0.107949
SNPs	24	26032285	A	C	downstream_gene_variant	DSG4	0.107718
SNPs	24	25954906	C	T	intron_variant	DSG2	0.107298
SNPs	24	26051525	A	G	intron_variant	DSG4	0.10603
SNPs	24	26055155	A	G	intron_variant	DSG4	0.105326
SNPs	24	26016187	T	C	intergenic_region	DSG3-DSG4	0.105109
SNPs	24	26032076	C	T	downstream_gene_variant	DSG4	0.104992
SNPs	24	25982762	T	G	intron_variant	DSG3	0.104927
SNPs	24	26043203	A	T	intron_variant	DSG4	0.102642
SNPs	24	26042601	C	T	synonymous_variant	DSG4	0.102209
SNPs	24	26026949	G	T	intergenic_region	DSG3-DSG4	0.101982
SNPs	24	26026951	G	C	intergenic_region	DSG3-DSG4	0.101982
SNPs	24	26026954	G	C	intergenic_region	DSG3-DSG4	0.101982
SNPs	24	26069611	T	C	intron_variant	DSG4	0.101706
SNPs	24	26035574	C	T	synonymous_variant	DSG4	0.0983907
SNPs	24	26037874	C	T	intron_variant	DSG4	0.0975465
SNPs	24	26055817	A	G	intron_variant	DSG4	0.0933018
SNPs	24	26062459	G	A	intron_variant	DSG4	0.0910279
SNPs	24	26034225	C	A	downstream_gene_variant	DSG4	0.0906033
SNPs	24	26037757	C	A	intron_variant	DSG4	0.0894565
SNPs	24	26040358	T	G	intron_variant	DSG4	0.0894565
SNPs	24	25981205	T	A	intron_variant	DSG3	0.0888326
SNPs	24	26057903	T	G	intron_variant	DSG4	0.0864187
SNPs	24	26056849	T	A	intron_variant	DSG4	0.0846063
SNPs	24	26054127	T	G	intron_variant	DSG4	0.0818489
SNPs	24	25988763	C	A	intron_variant	DSG3	0.081691
SNPs	24	26056947	A	G	intron_variant	DSG4	0.0815238
SNPs	24	25953749	T	C	intron_variant	DSG2	0.0814908
SNPs	24	25977811	T	G	intron_variant	DSG3	0.0810004
SNPs	24	25985333	G	A	intron_variant	DSG3	0.078758
SNPs	24	26058638	G	A	intron_variant	DSG4	0.0785374
SNPs	24	25956482	A	T	intron_variant	DSG2	0.0765068
SNPs	24	25955904	T	C	intron_variant	DSG2	0.0754043
SNPs	24	26030401	C	T	downstream_gene_variant	DSG4	0.0747079
SNPs	24	25970372	T	A	intergenic_region	DSG2-DSG3	0.0744097
SNPs	24	26043660	A	G	intron_variant	DSG4	0.0736368
SNPs	24	26054531	G	A	intron_variant	DSG4	0.0735907
SNPs	24	25985363	G	A	intron_variant	DSG3	0.0724455
SNPs	24	25997693	T	C	intron_variant	DSG3	0.0724455
SNPs	24	26001299	T	G	intron_variant	DSG3	0.0724455
SNPs	24	25972736	C	T	downstream_gene_variant	DSG3	0.0723756
SNPs	24	25955424	G	T	intron_variant	DSG2	0.0713074
SNPs	24	26037177	A	G	intron_variant	DSG4	0.0704593
SNPs	24	25972518	A	G	downstream_gene_variant	DSG3	0.0695767
SNPs	24	26032826	A	G	downstream_gene_variant	DSG4	0.0687961
SNPs	24	25956760	C	T	intron_variant	DSG2	0.0685635
SNPs	24	26027212	A	C	intergenic_region	DSG3-DSG4	0.0674561
SNPs	24	25975248	A	G	downstream_gene_variant	DSG3	0.0670852
SNPs	24	26028346	C	T	intergenic_region	DSG3-DSG4	0.0663
SNPs	24	26045836	C	G	intron_variant	DSG4	0.0657625
SNPs	24	26022393	G	A	intergenic_region	DSG3-DSG4	0.0655883
SNPs	24	26043451	C	T	intron_variant	DSG4	0.0642156
SNPs	24	25955540	C	T	intron_variant	DSG2	0.0641401
SNPs	24	25992357	G	C	intron_variant	DSG3	0.0640079
SNPs	24	26060487	G	A	missense_variant	DSG4	0.064003
SNPs	24	25956221	T	C	intron_variant	DSG2	0.0627806
SNPs	24	26042861	G	A	intron_variant	DSG4	0.0625769
SNPs	24	25991367	C	G	intron_variant	DSG3	0.0611175
SNPs	24	25974819	G	A	downstream_gene_variant	DSG3	0.0595494
SNPs	24	26043218	A	C	intron_variant	DSG4	0.0591663
SNPs	24	25994589	A	G	intron_variant	DSG3	0.0591517
SNPs	24	26055117	G	T	intron_variant	DSG4	0.0578912
SNPs	24	26037799	A	G	intron_variant	DSG4	0.0574259
SNPs	24	25969827	C	T	intergenic_region	DSG2-DSG3	0.057232
SNPs	24	26031978	A	G	downstream_gene_variant	DSG4	0.0571428
SNPs	24	25971494	T	C	downstream_gene_variant	DSG3	0.0570339
SNPs	24	25956741	G	A	intron_variant	DSG2	0.056618
SNPs	24	25991645	G	A	intron_variant	DSG3	0.0564663
SNPs	24	25997040	G	A	intron_variant	DSG3	0.0550896
SNPs	24	25998988	C	T	intron_variant	DSG3	0.0544607
SNPs	24	25984527	G	T	intron_variant	DSG3	0.0528658
SNPs	24	26035418	G	A	synonymous_variant	DSG4	0.052619
SNPs	24	25996691	C	T	intron_variant	DSG3	0.0525053
SNPs	24	26041713	C	A	intron_variant	DSG4	0.0524615
SNPs	24	26037658	A	G	intron_variant	DSG4	0.0522344
SNPs	24	25996826	G	A	intron_variant	DSG3	0.0509104
SNPs	24	26023541	A	G	intergenic_region	DSG3-DSG4	0.0498088
SNPs	24	25991581	T	C	intron_variant	DSG3	0.0484085
SNPs	24	25996557	A	G	intron_variant	DSG3	0.048297
SNPs	24	25988807	C	T	intron_variant	DSG3	0.048297
SNPs	24	25988812	G	A	intron_variant	DSG3	0.048297
SNPs	24	25988830	G	A	intron_variant	DSG3	0.048297
SNPs	24	25988838	G	T	intron_variant	DSG3	0.048297
SNPs	24	25988910	C	T	intron_variant	DSG3	0.048297
SNPs	24	25988920	G	A	intron_variant	DSG3	0.048297
SNPs	24	25988922	G	T	intron_variant	DSG3	0.048297
SNPs	24	25989116	C	A	intron_variant	DSG3	0.048297
SNPs	24	25989125	G	A	intron_variant	DSG3	0.048297
SNPs	24	25989145	C	A	intron_variant	DSG3	0.048297
SNPs	24	25995279	A	G	intron_variant	DSG3	0.048297
SNPs	24	25996432	A	G	intron_variant	DSG3	0.0478918
SNPs	24	25985499	G	A	missense_variant	DSG3	0.0475005
SNPs	24	25983855	T	C	intron_variant	DSG3	0.0475005
SNPs	24	25984028	C	T	intron_variant	DSG3	0.0475005
SNPs	24	25984838	A	G	intron_variant	DSG3	0.0475005
SNPs	24	25985751	A	C	intron_variant	DSG3	0.0475005
SNPs	24	25988870	C	T	intron_variant	DSG3	0.0475005
SNPs	24	25988873	C	T	intron_variant	DSG3	0.0475005
SNPs	24	25988877	G	A	intron_variant	DSG3	0.0475005
SNPs	24	25989747	G	A	intron_variant	DSG3	0.0475005
SNPs	24	25989939	A	G	synonymous_variant	DSG3	0.0475005
SNPs	24	25990302	A	T	intron_variant	DSG3	0.0475005
SNPs	24	25990319	T	C	intron_variant	DSG3	0.0475005
SNPs	24	25990848	C	T	intron_variant	DSG3	0.0475005
SNPs	24	25992876	G	A	intron_variant	DSG3	0.0475005
SNPs	24	25993878	G	A	intron_variant	DSG3	0.0475005
SNPs	24	25993918	C	T	intron_variant	DSG3	0.0475005
SNPs	24	25994529	G	A	intron_variant	DSG3	0.0475005
SNPs	24	25995413	G	C	intron_variant	DSG3	0.0475005
SNPs	24	25995788	T	C	intron_variant	DSG3	0.0475005
SNPs	24	25999710	A	G	intron_variant	DSG3	0.0475005
SNPs	24	26001697	G	T	intron_variant	DSG3	0.0470716
SNPs	24	25995949	T	C	intron_variant	DSG3	0.0467021
SNPs	24	25996177	C	T	intron_variant	DSG3	0.0467021
SNPs	24	25998129	A	G	missense_variant	DSG3	0.0467021
SNPs	24	25956414	T	C	intron_variant	DSG2	0.0463273
SNPs	24	25999541	T	C	intron_variant	DSG3	0.0451045
SNPs	24	25997354	A	G	intron_variant	DSG3	0.0446848
SNPs	24	25992816	G	A	intron_variant	DSG3	0.0435786
SNPs	24	26000029	C	T	intron_variant	DSG3	0.0435786
SNPs	24	25955619	C	T	intron_variant	DSG2	0.0425094
SNPs	24	25996221	T	C	intron_variant	DSG3	0.0419098
SNPs	24	26059653	T	G	intron_variant	DSG4	0.0415398
SNPs	24	25960526	G	A	upstream_gene_variant	DSG2	0.041429
SNPs	24	25997273	A	G	intron_variant	DSG3	0.0375746
SNPs	24	26010827	T	C	upstream_gene_variant	DSG3	0.0374976
SNPs	24	26010116	G	A	upstream_gene_variant	DSG3	0.0366845
SNPs	24	26004064	A	T	intron_variant	DSG3	0.0366845
SNPs	24	26014828	G	A	intergenic_region	DSG3-DSG4	0.0366845
SNPs	24	25997118	T	C	intron_variant	DSG3	0.036674
SNPs	24	25981251	T	C	intron_variant	DSG3	0.0342788
SNPs	24	26013691	C	T	intergenic_region	DSG3-DSG4	0.034275
SNPs	24	26015116	T	C	intergenic_region	DSG3-DSG4	0.0341277
SNPs	24	25998470	A	G	intron_variant	DSG3	0.0340473
SNPs	24	25992350	A	C	intron_variant	DSG3	0.0338874
SNPs	24	26005260	C	T	intron_variant	DSG3	0.0334361
SNPs	24	26040506	A	G	intron_variant	DSG4	0.0332886
SNPs	24	25956962	A	G	intron_variant	DSG2	0.031579
SNPs	24	26025178	C	G	intergenic_region	DSG3-DSG4	0.0314073
SNPs	24	26002423	T	C	intron_variant	DSG3	0.0309306
SNPs	24	25953769	T	C	intron_variant	DSG2	0.0306196
SNPs	24	26013762	G	T	intergenic_region	DSG3-DSG4	0.0303318
SNPs	24	26015209	T	A	intergenic_region	DSG3-DSG4	0.0300654
SNPs	24	25974871	G	C	downstream_gene_variant	DSG3	0.0293985
SNPs	24	26008192	T	A	intron_variant	DSG3	0.0293985
SNPs	24	26059198	T	C	intron_variant	DSG4	0.0293337
SNPs	24	26012772	A	G	upstream_gene_variant	DSG3	0.0278036
SNPs	24	26012865	A	G	upstream_gene_variant	DSG3	0.0278036
SNPs	24	26005294	G	T	intron_variant	DSG3	0.0262136
SNPs	24	26066882	G	A	intron_variant	DSG4	0.0248487
SNPs	24	26056776	C	G	missense_variant	DSG4	0.0247944
SNPs	24	26035490	A	G	synonymous_variant	DSG4	0.0239616
SNPs	24	26068524	A	C	intron_variant	DSG4	0.0233731
SNPs	24	26002053	C	T	intron_variant	DSG3	0.0211036
SNPs	24	25953862	C	T	intron_variant	DSG2	0.0174807
SNPs	24	26027778	A	G	intergenic_region	DSG3-DSG4	0.0170683
SNPs	24	26021796	T	C	intergenic_region	DSG3-DSG4	0.0154106
SNPs	24	26012556	C	A	upstream_gene_variant	DSG3	0.00734612
SNPs	24	26006760	G	A	intron_variant	DSG3	-0.00138844
SNPs	24	26006762	A	G	intron_variant	DSG3	-0.00138844
SNPs	24	26030041	C	T	downstream_gene_variant	DSG4	-0.0016905
SNPs	24	25993791	T	C	intron_variant	DSG3	-0.00272698
SNPs	24	26040689	C	T	intron_variant	DSG4	-0.00691716
SNPs	24	26024992	A	T	intergenic_region	DSG3-DSG4	-0.018729
SNPs	24	26065678	G	A	intron_variant	DSG4	-0.0189917
SNPs	24	26057210	A	G	intron_variant	DSG4	-0.0198399
SNPs	24	26021733	C	T,A	intergenic_region	DSG3-DSG4
SNPs	24	26024121	A	G,*	intergenic_region	DSG3-DSG4
SNPs	24	26024313	G	A,T	intergenic_region	DSG3-DSG4
Indels	24	25950615	A	AT	intron_variant	DSG2
Indels	24	25950731	CTG	C	intron_variant	DSG2
Indels	24	25952155	T	TCAACCTGGTGCTCTGTGA	intron_variant	DSG2
Indels	24	25952306	GAA	GA	intron_variant	DSG2
Indels	24	25956848	CAATGACTTG	C	intron_variant	DSG2
Indels	24	25957149	A	AT	intron_variant	DSG2
Indels	24	25957679	G	GA	intron_variant	DSG2
Indels	24	25958978	G	GT	upstream_gene_variant	DSG2
Indels	24	25961812	TA	T	upstream_gene_variant	DSG2
Indels	24	25963501	AG	A	intergenic_region	DSG2-DSG3
Indels	24	25964732	TC	T	intergenic_region	DSG2-DSG3
Indels	24	25965117	GACTGA	G	intergenic_region	DSG2-DSG3
Indels	24	25965735	TGA	T	intergenic_region	DSG2-DSG3
Indels	24	25967470	TGTTCTTA	T	intergenic_region	DSG2-DSG3
Indels	24	25971903	TA	T	downstream_gene_variant	DSG3
Indels	24	25976043	T	TC	downstream_gene_variant	DSG3
Indels	24	25984365	C	CAT	intron_variant	DSG3
Indels	24	25985807	TA	T	intron_variant	DSG3
Indels	24	25986558	C	CAG	intron_variant	DSG3
Indels	24	25987538	GT	G	intron_variant	DSG3
Indels	24	25987583	C	CAT	intron_variant	DSG3
Indels	24	25989461	AC	A	intron_variant	DSG3
Indels	24	25990500	GAA	G	intron_variant	DSG3
Indels	24	25995677	G	GAGAGGACATGTT	intron_variant	DSG3
Indels	24	25996724	TA	T	intron_variant	DSG3
Indels	24	25997346	GA	G	intron_variant	DSG3
Indels	24	25999004	GTAATCTATAATCTGTAATCTA	G	intron_variant	DSG3
Indels	24	25999391	C	CT	intron_variant	DSG3
Indels	24	26006390	A	AT	intron_variant	DSG3
Indels	24	26006594	T	TG	intron_variant	DSG3
Indels	24	26010667	TATAAG	T	upstream_gene_variant	DSG3
Indels	24	26011577	T	TAGC	upstream_gene_variant	DSG3
Indels	24	26012452	CTG	C	upstream_gene_variant	DSG3
Indels	24	26015188	TAAGG	T	intergenic_region	DSG3-DSG4
Indels	24	26015360	A	AAAT	intergenic_region	DSG3-DSG4
Indels	24	26017612	ACAACT	A	intergenic_region	DSG3-DSG4
Indels	24	26017954	G	GAAAACA	intergenic_region	DSG3-DSG4
Indels	24	26020696	A	AT	intergenic_region	DSG3-DSG4
Indels	24	26021146	CT	C	intergenic_region	DSG3-DSG4
Indels	24	26022803	T	TAG	intergenic_region	DSG3-DSG4
Indels	24	26024108	TCACTCAA	T	intergenic_region	DSG3-DSG4
Indels	24	26024119	TCA	T	intergenic_region	DSG3-DSG4
Indels	24	26024123	TGA	T	intergenic_region	DSG3-DSG4
Indels	24	26024993	AAAAG	A	intergenic_region	DSG3-DSG4
Indels	24	26025627	A	AGT	intergenic_region	DSG3-DSG4
Indels	24	26025738	T	TA	intergenic_region	DSG3-DSG4
Indels	24	26025942	TTTC	T	intergenic_region	DSG3-DSG4
Indels	24	26026120	T	TC	intergenic_region	DSG3-DSG4
Indels	24	26026476	A	AG	intergenic_region	DSG3-DSG4
Indels	24	26026948	T	TC	intergenic_region	DSG3-DSG4
Indels	24	26026952	T	TCTCA	intergenic_region	DSG3-DSG4
Indels	24	26027300	AACAGTAAAT	A	intergenic_region	DSG3-DSG4
Indels	24	26027682	C	CTTTAAATATAAATTCT	intergenic_region	DSG3-DSG4
Indels	24	26028092	CTTA	C	intergenic_region	DSG3-DSG4
Indels	24	26028452	CAGGCAAGAGTACTGG	C	intergenic_region	DSG3-DSG4
Indels	24	26028805	TCAGTC	T	intergenic_region	DSG3-DSG4
Indels	24	26029099	CTGA	C	intergenic_region	DSG3-DSG4
Indels	24	26029300	TA	T	intergenic_region	DSG3-DSG4
Indels	24	26031983	AAG	A	downstream_gene_variant	DSG4
Indels	24	26033294	GT	G	downstream_gene_variant	DSG4
Indels	24	26035942	G	GT	intron_variant	DSG4
Indels	24	26036347	CAG	C	intron_variant	DSG4
Indels	24	26037252	CG	C	intron_variant	DSG4
Indels	24	26040043	TAC	T	intron_variant	DSG4
Indels	24	26041520	GTTCT	G	intron_variant	DSG4
Indels	24	26044151	ATTT	ATT	intron_variant	DSG4
Indels	24	26045715	ATT	ATTT	intron_variant	DSG4
Indels	24	26046410	AATTCCATGGACTGT	A	intron_variant	DSG4
Indels	24	26049518	T	TA	intron_variant	DSG4
Indels	24	26052579	TATA	T	intron_variant	DSG4
Indels	24	26052583	CATACTTTGTTTACACCATGTCTAATACTACCTTGA	C	intron_variant	DSG4
Indels	24	26055879	AGG	A	intron_variant	DSG4
Indels	24	26055881	G	GAACCAA	intron_variant	DSG4
Indels	24	26057220	GTGGTTGACA	G	intron_variant	DSG4
Indels	24	26060543	AC	A	intron_variant	DSG4
Indels	24	26061490	T	TC	intron_variant	DSG4
Indels	24	26065073	AC	A	intron_variant	DSG4
Indels	24	26065619	GCATAAGATCTCTTATTT	G	intron_variant	DSG4
Indels	24	26065837	G	GTTT	intron_variant	DSG4
Indels	24	26065987	CTTTTTT	CTTTTT	intron_variant	DSG4
Indels	24	26066016	G	GTAATTTTAATTTTGTAAT	intron_variant	DSG4
Indels	24	26066266	TCTC	T	intron_variant	DSG4
Indels	24	26066360	G	GC	intron_variant	DSG4
Indels	24	26066423	T	TAGTG	intron_variant	DSG4
Indels	24	26067365	AT	A	intron_variant	DSG4
Indels	24	26067401	A	ATAATT	intron_variant	DSG4
Indels	24	26069090	A	AT	intron_variant	DSG4
Indels	24	26069125	ACT	A	intron_variant	DSG4
Indels	24	26069475	TC	T	intron_variant	DSG4

## Sheet: S12-3
Table S12-3 Summary of SNVs in the selection signal encompassing KITLG in Tibetan Cashmere goats
Types of SNVs	CHR	POS	REF	ALT	Region	Gene
SNPs	5	18020021	C	G	intron_variant	KITLG
SNPs	5	18020052	T	C	intron_variant	KITLG
SNPs	5	18020065	T	C	intron_variant	KITLG
SNPs	5	18020088	C	T	intron_variant	KITLG
SNPs	5	18020158	A	C	intron_variant	KITLG
SNPs	5	18020395	T	A	intron_variant	KITLG
SNPs	5	18020636	G	A	intron_variant	KITLG
SNPs	5	18020801	C	T	intron_variant	KITLG
SNPs	5	18020802	T	C	intron_variant	KITLG
SNPs	5	18020814	T	C	intron_variant	KITLG
SNPs	5	18020906	T	C	intron_variant	KITLG
SNPs	5	18021264	C	T	intron_variant	KITLG
SNPs	5	18021295	G	A	intron_variant	KITLG
SNPs	5	18021301	T	C	intron_variant	KITLG
SNPs	5	18021371	C	T	intron_variant	KITLG
SNPs	5	18021432	A	G	intron_variant	KITLG
SNPs	5	18021458	C	T	intron_variant	KITLG
SNPs	5	18021550	C	A	intron_variant	KITLG
SNPs	5	18021650	G	A	intron_variant	KITLG
SNPs	5	18021825	T	C	intron_variant	KITLG
SNPs	5	18021831	G	T	intron_variant	KITLG
SNPs	5	18021937	T	A	intron_variant	KITLG
SNPs	5	18021975	C	T	intron_variant	KITLG
SNPs	5	18022167	A	G	intron_variant	KITLG
SNPs	5	18022271	T	C	intron_variant	KITLG
SNPs	5	18022375	G	C	intron_variant	KITLG
SNPs	5	18022384	A	C	intron_variant	KITLG
SNPs	5	18022648	T	A	intron_variant	KITLG
SNPs	5	18022649	A	T	intron_variant	KITLG
SNPs	5	18022674	T	C	intron_variant	KITLG
SNPs	5	18022832	A	G	intron_variant	KITLG
SNPs	5	18023326	C	A	intron_variant	KITLG
SNPs	5	18023361	C	T	intron_variant	KITLG
SNPs	5	18023414	G	A	intron_variant	KITLG
SNPs	5	18023428	T	A	intron_variant	KITLG
SNPs	5	18023513	G	A	intron_variant	KITLG
SNPs	5	18023545	G	C	intron_variant	KITLG
SNPs	5	18023641	A	G	intron_variant	KITLG
SNPs	5	18023677	A	C	intron_variant	KITLG
SNPs	5	18023680	G	A	intron_variant	KITLG
SNPs	5	18023734	C	T	intron_variant	KITLG
SNPs	5	18023782	T	G	intron_variant	KITLG
SNPs	5	18023814	T	C	intron_variant	KITLG
SNPs	5	18023872	C	T	intron_variant	KITLG
SNPs	5	18023903	A	G	intron_variant	KITLG
SNPs	5	18023954	A	G	intron_variant	KITLG
SNPs	5	18024019	G	A	intron_variant	KITLG
SNPs	5	18024056	T	C	intron_variant	KITLG
SNPs	5	18024069	A	G	intron_variant	KITLG
SNPs	5	18024129	G	A	intron_variant	KITLG
SNPs	5	18024187	G	C	intron_variant	KITLG
SNPs	5	18024195	G	C	intron_variant	KITLG
SNPs	5	18024197	C	T	intron_variant	KITLG
SNPs	5	18024267	C	A	intron_variant	KITLG
SNPs	5	18024330	A	G	intron_variant	KITLG
SNPs	5	18024484	A	G	intron_variant	KITLG
SNPs	5	18024498	C	T	intron_variant	KITLG
SNPs	5	18024621	G	A	intron_variant	KITLG
SNPs	5	18024684	C	G	intron_variant	KITLG
SNPs	5	18024795	T	G	intron_variant	KITLG
SNPs	5	18024985	C	T	intron_variant	KITLG
SNPs	5	18025003	G	A	intron_variant	KITLG
SNPs	5	18025066	G	A	intron_variant	KITLG
SNPs	5	18025088	A	G	intron_variant	KITLG
SNPs	5	18025336	C	T	intron_variant	KITLG
SNPs	5	18025358	T	C	intron_variant	KITLG
SNPs	5	18025552	C	A	intron_variant	KITLG
SNPs	5	18025563	C	T	intron_variant	KITLG
SNPs	5	18025600	T	C	intron_variant	KITLG
SNPs	5	18025636	C	T	intron_variant	KITLG
SNPs	5	18025798	A	G	intron_variant	KITLG
SNPs	5	18026113	G	A	intron_variant	KITLG
SNPs	5	18026385	T	G	intron_variant	KITLG
SNPs	5	18027077	A	G	intron_variant	KITLG
SNPs	5	18027124	T	C	intron_variant	KITLG
SNPs	5	18027559	C	A	intron_variant	KITLG
SNPs	5	18027565	C	T	intron_variant	KITLG
SNPs	5	18027707	G	T	intron_variant	KITLG
SNPs	5	18027736	C	T	intron_variant	KITLG
SNPs	5	18027744	A	T	intron_variant	KITLG
SNPs	5	18027848	G	A	intron_variant	KITLG
SNPs	5	18027926	G	A	intron_variant	KITLG
SNPs	5	18027997	G	A	intron_variant	KITLG
SNPs	5	18028028	G	A	intron_variant	KITLG
SNPs	5	18028136	T	C	intron_variant	KITLG
SNPs	5	18028143	G	A	intron_variant	KITLG
SNPs	5	18028150	A	G	intron_variant	KITLG
SNPs	5	18028257	G	C	intron_variant	KITLG
SNPs	5	18028276	T	A	intron_variant	KITLG
SNPs	5	18028296	G	A	intron_variant	KITLG
SNPs	5	18028439	A	C	intron_variant	KITLG
SNPs	5	18028503	G	A	intron_variant	KITLG
SNPs	5	18028566	A	G	intron_variant	KITLG
SNPs	5	18028571	G	A	intron_variant	KITLG
SNPs	5	18028661	A	G	intron_variant	KITLG
SNPs	5	18028680	G	T	intron_variant	KITLG
SNPs	5	18028686	T	C	intron_variant	KITLG
SNPs	5	18028764	G	A	intron_variant	KITLG
SNPs	5	18028805	T	C	intron_variant	KITLG
SNPs	5	18028854	A	G	intron_variant	KITLG
SNPs	5	18028884	G	T	intron_variant	KITLG
SNPs	5	18028911	C	T	intron_variant	KITLG
SNPs	5	18029118	C	T	intron_variant	KITLG
SNPs	5	18029326	T	C	intron_variant	KITLG
SNPs	5	18029714	T	A	intron_variant	KITLG
SNPs	5	18029867	A	G	intron_variant	KITLG
SNPs	5	18029878	G	A	intron_variant	KITLG
SNPs	5	18030025	T	G	intron_variant	KITLG
SNPs	5	18030259	C	T	intron_variant	KITLG
SNPs	5	18030288	T	G	intron_variant	KITLG
SNPs	5	18030291	A	G	intron_variant	KITLG
SNPs	5	18030470	T	G	intron_variant	KITLG
SNPs	5	18030600	C	T	intron_variant	KITLG
SNPs	5	18030602	G	A	intron_variant	KITLG
SNPs	5	18031099	T	C	intron_variant	KITLG
SNPs	5	18031130	G	A	intron_variant	KITLG
SNPs	5	18031274	A	G	intron_variant	KITLG
SNPs	5	18031340	G	T	intron_variant	KITLG
SNPs	5	18031421	T	G	intron_variant	KITLG
SNPs	5	18031622	A	G	intron_variant	KITLG
SNPs	5	18031633	G	C	intron_variant	KITLG
SNPs	5	18031657	G	C	intron_variant	KITLG
SNPs	5	18031709	A	G	intron_variant	KITLG
SNPs	5	18031771	A	G	intron_variant	KITLG
SNPs	5	18031790	C	T	intron_variant	KITLG
SNPs	5	18031844	G	T	intron_variant	KITLG
SNPs	5	18031981	A	G,*	intron_variant	KITLG
SNPs	5	18032182	C	T	intron_variant	KITLG
SNPs	5	18032233	G	C	intron_variant	KITLG
SNPs	5	18032313	A	G	intron_variant	KITLG
SNPs	5	18032402	G	A	intron_variant	KITLG
SNPs	5	18032451	A	G	intron_variant	KITLG
SNPs	5	18032551	G	A	intron_variant	KITLG
SNPs	5	18032555	G	A	intron_variant	KITLG
SNPs	5	18032726	G	A	intron_variant	KITLG
SNPs	5	18032761	C	A	intron_variant	KITLG
SNPs	5	18032818	A	G	intron_variant	KITLG
SNPs	5	18032821	T	A	intron_variant	KITLG
SNPs	5	18032827	C	T	intron_variant	KITLG
SNPs	5	18032844	C	T	intron_variant	KITLG
SNPs	5	18032989	C	T	intron_variant	KITLG
SNPs	5	18032993	A	G	intron_variant	KITLG
SNPs	5	18033002	C	T	intron_variant	KITLG
SNPs	5	18033007	A	G	intron_variant	KITLG
SNPs	5	18033026	C	T	intron_variant	KITLG
SNPs	5	18033074	T	C	intron_variant	KITLG
SNPs	5	18033242	A	G	intron_variant	KITLG
SNPs	5	18033319	A	G	intron_variant	KITLG
SNPs	5	18033329	A	G	intron_variant	KITLG
SNPs	5	18033341	A	G	intron_variant	KITLG
SNPs	5	18033391	G	A	intron_variant	KITLG
SNPs	5	18033517	A	G	intron_variant	KITLG
SNPs	5	18034083	G	A	intron_variant	KITLG
SNPs	5	18034338	G	A	intron_variant	KITLG
SNPs	5	18034376	C	T	intron_variant	KITLG
SNPs	5	18034407	C	G	intron_variant	KITLG
SNPs	5	18034491	C	T	intron_variant	KITLG
SNPs	5	18034494	G	T	intron_variant	KITLG
SNPs	5	18034552	C	T	intron_variant	KITLG
SNPs	5	18034589	T	C	intron_variant	KITLG
SNPs	5	18034611	G	A	intron_variant	KITLG
SNPs	5	18034688	G	T	intron_variant	KITLG
SNPs	5	18034694	G	T	intron_variant	KITLG
SNPs	5	18034717	T	G	intron_variant	KITLG
SNPs	5	18034719	C	T	intron_variant	KITLG
SNPs	5	18034807	A	G	intron_variant	KITLG
SNPs	5	18034836	T	C	intron_variant	KITLG
SNPs	5	18034894	G	C	intron_variant	KITLG
SNPs	5	18035032	A	G	intron_variant	KITLG
SNPs	5	18035108	G	A	intron_variant	KITLG
SNPs	5	18035203	C	T	intron_variant	KITLG
SNPs	5	18035222	A	G	intron_variant	KITLG
SNPs	5	18035481	G	A	intron_variant	KITLG
SNPs	5	18035659	A	G	intron_variant	KITLG
SNPs	5	18035682	C	T	intron_variant	KITLG
SNPs	5	18035749	C	T	intron_variant	KITLG
SNPs	5	18035777	C	T	intron_variant	KITLG
SNPs	5	18035801	C	T	intron_variant	KITLG
SNPs	5	18035842	G	A	intron_variant	KITLG
SNPs	5	18035851	G	A	intron_variant	KITLG
SNPs	5	18035867	G	A	intron_variant	KITLG
SNPs	5	18035902	A	T,G	intron_variant	KITLG
SNPs	5	18035926	C	T	intron_variant	KITLG
SNPs	5	18035940	T	C	intron_variant	KITLG
SNPs	5	18036169	T	C	intron_variant	KITLG
SNPs	5	18036407	A	G	intron_variant	KITLG
SNPs	5	18036469	C	T	intron_variant	KITLG
SNPs	5	18036475	G	A	intron_variant	KITLG
SNPs	5	18036551	A	G	intron_variant	KITLG
SNPs	5	18036637	A	G	intron_variant	KITLG
SNPs	5	18036761	A	C	intron_variant	KITLG
SNPs	5	18036846	C	G	intron_variant	KITLG
SNPs	5	18036997	C	T	intron_variant	KITLG
SNPs	5	18037099	C	T	intron_variant	KITLG
SNPs	5	18037113	C	T	intron_variant	KITLG
SNPs	5	18037209	A	G	intron_variant	KITLG
SNPs	5	18037330	G	A	intron_variant	KITLG
SNPs	5	18037340	T	C	intron_variant	KITLG
SNPs	5	18037484	T	C	intron_variant	KITLG
SNPs	5	18037540	A	T	intron_variant	KITLG
SNPs	5	18037547	C	A	intron_variant	KITLG
SNPs	5	18038038	C	G	intron_variant	KITLG
SNPs	5	18038212	G	A	intron_variant	KITLG
SNPs	5	18038339	G	A	intron_variant	KITLG
SNPs	5	18038385	G	A	intron_variant	KITLG
SNPs	5	18038495	G	A	intron_variant	KITLG
SNPs	5	18038927	A	G	intron_variant	KITLG
SNPs	5	18038977	C	G	intron_variant	KITLG
SNPs	5	18039415	A	G	intron_variant	KITLG
SNPs	5	18039458	T	C	intron_variant	KITLG
SNPs	5	18039478	G	A	intron_variant	KITLG
SNPs	5	18039499	T	A	intron_variant	KITLG
SNPs	5	18039511	C	G	intron_variant	KITLG
SNPs	5	18039777	C	T	downstream_gene_variant	KITLG
SNPs	5	18039830	C	T	downstream_gene_variant	KITLG
SNPs	5	18039840	C	A	downstream_gene_variant	KITLG
SNPs	5	18039857	G	A	downstream_gene_variant	KITLG
SNPs	5	18039865	G	A	downstream_gene_variant	KITLG
SNPs	5	18039938	T	G	downstream_gene_variant	KITLG
SNPs	5	18040035	T	C	downstream_gene_variant	KITLG
SNPs	5	18040054	G	A	downstream_gene_variant	KITLG
SNPs	5	18040120	G	T	downstream_gene_variant	KITLG
SNPs	5	18040239	A	G	downstream_gene_variant	KITLG
SNPs	5	18040251	C	T	downstream_gene_variant	KITLG
SNPs	5	18040255	C	T	downstream_gene_variant	KITLG
SNPs	5	18040259	C	T	downstream_gene_variant	KITLG
SNPs	5	18040399	G	A	downstream_gene_variant	KITLG
SNPs	5	18040566	C	T	downstream_gene_variant	KITLG
SNPs	5	18040637	C	G	downstream_gene_variant	KITLG
SNPs	5	18040650	G	A	downstream_gene_variant	KITLG
SNPs	5	18040695	C	T	downstream_gene_variant	KITLG
SNPs	5	18040854	A	T	downstream_gene_variant	KITLG
SNPs	5	18040922	T	C	downstream_gene_variant	KITLG
SNPs	5	18040987	A	G	downstream_gene_variant	KITLG
SNPs	5	18040988	C	T	downstream_gene_variant	KITLG
SNPs	5	18041015	T	C	downstream_gene_variant	KITLG
SNPs	5	18041018	G	A	downstream_gene_variant	KITLG
SNPs	5	18041224	G	T	downstream_gene_variant	KITLG
SNPs	5	18041245	G	A	downstream_gene_variant	KITLG
SNPs	5	18041254	A	G	downstream_gene_variant	KITLG
SNPs	5	18041388	C	A	downstream_gene_variant	KITLG
SNPs	5	18041486	C	A	downstream_gene_variant	KITLG
SNPs	5	18041508	A	G	downstream_gene_variant	KITLG
SNPs	5	18041524	C	T	downstream_gene_variant	KITLG
SNPs	5	18041572	T	C	downstream_gene_variant	KITLG
SNPs	5	18041594	A	G	downstream_gene_variant	KITLG
SNPs	5	18041603	G	A	downstream_gene_variant	KITLG
SNPs	5	18041607	G	T	downstream_gene_variant	KITLG
SNPs	5	18041638	A	G	downstream_gene_variant	KITLG
SNPs	5	18041683	T	C	downstream_gene_variant	KITLG
SNPs	5	18041690	G	A	downstream_gene_variant	KITLG
SNPs	5	18041708	A	G	downstream_gene_variant	KITLG
SNPs	5	18041779	T	G	downstream_gene_variant	KITLG
SNPs	5	18041831	C	T	downstream_gene_variant	KITLG
SNPs	5	18041853	A	G	downstream_gene_variant	KITLG
SNPs	5	18041863	A	G	downstream_gene_variant	KITLG
SNPs	5	18041874	T	C	downstream_gene_variant	KITLG
SNPs	5	18041922	A	G	downstream_gene_variant	KITLG
SNPs	5	18041924	A	G	downstream_gene_variant	KITLG
SNPs	5	18041952	C	T	downstream_gene_variant	KITLG
SNPs	5	18041961	C	A	downstream_gene_variant	KITLG
SNPs	5	18041974	C	T	downstream_gene_variant	KITLG
SNPs	5	18041989	C	T	downstream_gene_variant	KITLG
SNPs	5	18042027	G	A	downstream_gene_variant	KITLG
SNPs	5	18042096	G	C	downstream_gene_variant	KITLG
SNPs	5	18042098	A	G	downstream_gene_variant	KITLG
SNPs	5	18042226	C	T	downstream_gene_variant	KITLG
SNPs	5	18042237	C	T	downstream_gene_variant	KITLG
SNPs	5	18042257	G	A	downstream_gene_variant	KITLG
SNPs	5	18042290	C	T,*	downstream_gene_variant	KITLG
SNPs	5	18042291	A	G,*	downstream_gene_variant	KITLG
SNPs	5	18042293	C	A	downstream_gene_variant	KITLG
SNPs	5	18042295	G	A	downstream_gene_variant	KITLG
SNPs	5	18042329	G	T	downstream_gene_variant	KITLG
SNPs	5	18042379	G	A	downstream_gene_variant	KITLG
SNPs	5	18042392	C	A	downstream_gene_variant	KITLG
SNPs	5	18042394	T	G	downstream_gene_variant	KITLG
SNPs	5	18042416	T	C	downstream_gene_variant	KITLG
SNPs	5	18042426	G	A	downstream_gene_variant	KITLG
SNPs	5	18042427	G	A	downstream_gene_variant	KITLG
SNPs	5	18042541	C	A	downstream_gene_variant	KITLG
SNPs	5	18042542	T	A	downstream_gene_variant	KITLG
SNPs	5	18042620	C	G	downstream_gene_variant	KITLG
SNPs	5	18042645	A	C	downstream_gene_variant	KITLG
SNPs	5	18042749	C	G	downstream_gene_variant	KITLG
SNPs	5	18042769	T	C	downstream_gene_variant	KITLG
SNPs	5	18042883	T	G	downstream_gene_variant	KITLG
SNPs	5	18042893	C	G	downstream_gene_variant	KITLG
SNPs	5	18042961	T	C	downstream_gene_variant	KITLG
SNPs	5	18043269	G	A	downstream_gene_variant	KITLG
SNPs	5	18043337	T	C	downstream_gene_variant	KITLG
SNPs	5	18043357	A	G	downstream_gene_variant	KITLG
SNPs	5	18043424	G	C	downstream_gene_variant	KITLG
SNPs	5	18043488	C	T	downstream_gene_variant	KITLG
SNPs	5	18043533	G	A	downstream_gene_variant	KITLG
SNPs	5	18043742	C	A	downstream_gene_variant	KITLG
SNPs	5	18043822	A	G	downstream_gene_variant	KITLG
SNPs	5	18043967	T	A	downstream_gene_variant	KITLG
SNPs	5	18043995	G	C	downstream_gene_variant	KITLG
SNPs	5	18044111	C	T	downstream_gene_variant	KITLG
SNPs	5	18044112	G	A	downstream_gene_variant	KITLG
SNPs	5	18044131	C	T	downstream_gene_variant	KITLG
SNPs	5	18044522	A	C	downstream_gene_variant	KITLG
SNPs	5	18044584	C	G	downstream_gene_variant	KITLG
SNPs	5	18045446	T	A	3_prime_UTR_variant	KITLG
SNPs	5	18045482	C	G	3_prime_UTR_variant	KITLG
SNPs	5	18045489	C	T	3_prime_UTR_variant	KITLG
SNPs	5	18045788	C	A	3_prime_UTR_variant	KITLG
SNPs	5	18046028	T	C	3_prime_UTR_variant	KITLG
SNPs	5	18046173	C	T	3_prime_UTR_variant	KITLG
SNPs	5	18046260	T	C	3_prime_UTR_variant	KITLG
SNPs	5	18046341	G	A	3_prime_UTR_variant	KITLG
SNPs	5	18046421	G	A	3_prime_UTR_variant	KITLG
SNPs	5	18046632	T	G	3_prime_UTR_variant	KITLG
SNPs	5	18046633	G	A	3_prime_UTR_variant	KITLG
SNPs	5	18046689	T	G	3_prime_UTR_variant	KITLG
SNPs	5	18047090	C	T	3_prime_UTR_variant	KITLG
SNPs	5	18047236	T	C	3_prime_UTR_variant	KITLG
SNPs	5	18047279	G	T,A	3_prime_UTR_variant	KITLG
SNPs	5	18047294	C	T	3_prime_UTR_variant	KITLG
SNPs	5	18047318	G	A	3_prime_UTR_variant	KITLG
SNPs	5	18047393	T	C	3_prime_UTR_variant	KITLG
SNPs	5	18047446	A	T	3_prime_UTR_variant	KITLG
SNPs	5	18047520	C	T	3_prime_UTR_variant	KITLG
SNPs	5	18047533	T	C	3_prime_UTR_variant	KITLG
SNPs	5	18047555	G	A	3_prime_UTR_variant	KITLG
SNPs	5	18047585	T	C	3_prime_UTR_variant	KITLG
SNPs	5	18048133	A	C	3_prime_UTR_variant	KITLG
SNPs	5	18048215	C	A	3_prime_UTR_variant	KITLG
SNPs	5	18048227	C	T	3_prime_UTR_variant	KITLG
SNPs	5	18048328	T	C	3_prime_UTR_variant	KITLG
SNPs	5	18048344	G	A	3_prime_UTR_variant	KITLG
SNPs	5	18048381	T	C	3_prime_UTR_variant	KITLG
SNPs	5	18048487	C	T	3_prime_UTR_variant	KITLG
SNPs	5	18048550	G	T	3_prime_UTR_variant	KITLG
SNPs	5	18048589	C	A	3_prime_UTR_variant	KITLG
SNPs	5	18048618	G	A	3_prime_UTR_variant	KITLG
SNPs	5	18048657	G	T	3_prime_UTR_variant	KITLG
SNPs	5	18048830	G	T	3_prime_UTR_variant	KITLG
SNPs	5	18049011	G	A	intron_variant	KITLG
SNPs	5	18049037	T	C	intron_variant	KITLG
SNPs	5	18049080	T	A	intron_variant	KITLG
SNPs	5	18049157	C	T	intron_variant	KITLG
SNPs	5	18049229	C	T	intron_variant	KITLG
SNPs	5	18049290	A	G	intron_variant	KITLG
SNPs	5	18049311	T	C	intron_variant	KITLG
SNPs	5	18049574	G	C	intron_variant	KITLG
SNPs	5	18049625	C	T	intron_variant	KITLG
SNPs	5	18049698	C	G	intron_variant	KITLG
SNPs	5	18049703	A	C	intron_variant	KITLG
SNPs	5	18049946	C	T	intron_variant	KITLG
SNPs	5	18050120	A	C	intron_variant	KITLG
SNPs	5	18050249	G	A	intron_variant	KITLG
SNPs	5	18050262	C	G	intron_variant	KITLG
SNPs	5	18050291	G	A	intron_variant	KITLG
SNPs	5	18050394	T	G	intron_variant	KITLG
SNPs	5	18050477	T	C	intron_variant	KITLG
SNPs	5	18050525	C	T	intron_variant	KITLG
SNPs	5	18050715	T	C	intron_variant	KITLG
SNPs	5	18050776	A	G	intron_variant	KITLG
SNPs	5	18050922	G	A	intron_variant	KITLG
SNPs	5	18051010	C	A	intron_variant	KITLG
SNPs	5	18051075	G	A	intron_variant	KITLG
SNPs	5	18051192	G	C	intron_variant	KITLG
SNPs	5	18051332	T	C	intron_variant	KITLG
SNPs	5	18051439	A	G	intron_variant	KITLG
SNPs	5	18051925	C	T	intron_variant	KITLG
SNPs	5	18052267	C	T	intron_variant	KITLG
SNPs	5	18052309	A	T	intron_variant	KITLG
SNPs	5	18052493	A	G	intron_variant	KITLG
SNPs	5	18052553	A	C	intron_variant	KITLG
SNPs	5	18052606	C	T	intron_variant	KITLG
SNPs	5	18052654	G	A	intron_variant	KITLG
SNPs	5	18052769	G	A	intron_variant	KITLG
SNPs	5	18052787	C	G	intron_variant	KITLG
SNPs	5	18052867	C	T	intron_variant	KITLG
SNPs	5	18052961	T	C	intron_variant	KITLG
SNPs	5	18053006	G	T	intron_variant	KITLG
SNPs	5	18053175	C	T	intron_variant	KITLG
SNPs	5	18053216	C	G	intron_variant	KITLG
SNPs	5	18053241	T	G	intron_variant	KITLG
SNPs	5	18053314	C	T	intron_variant	KITLG
SNPs	5	18053383	T	C	intron_variant	KITLG
SNPs	5	18053471	G	A	intron_variant	KITLG
SNPs	5	18053634	T	C	intron_variant	KITLG
SNPs	5	18053963	T	C	intron_variant	KITLG
SNPs	5	18054007	A	G	intron_variant	KITLG
SNPs	5	18054041	G	T	intron_variant	KITLG
SNPs	5	18054187	T	C	intron_variant	KITLG
SNPs	5	18054202	A	T	intron_variant	KITLG
SNPs	5	18054241	T	A	intron_variant	KITLG
SNPs	5	18054333	T	C	intron_variant	KITLG
SNPs	5	18054429	T	C	intron_variant	KITLG
SNPs	5	18054549	T	C	intron_variant	KITLG
SNPs	5	18054697	T	C	intron_variant	KITLG
SNPs	5	18054806	T	C	intron_variant	KITLG
SNPs	5	18054892	C	T	intron_variant	KITLG
SNPs	5	18054901	T	C	intron_variant	KITLG
SNPs	5	18054997	G	C	intron_variant	KITLG
SNPs	5	18055236	T	C	intron_variant	KITLG
SNPs	5	18055339	C	A	intron_variant	KITLG
SNPs	5	18055351	T	C	intron_variant	KITLG
SNPs	5	18055620	G	C	intron_variant	KITLG
SNPs	5	18055629	T	C	intron_variant	KITLG
SNPs	5	18055723	T	C	intron_variant	KITLG
SNPs	5	18055728	C	T	intron_variant	KITLG
SNPs	5	18055877	T	C	intron_variant	KITLG
SNPs	5	18056029	T	C	intron_variant	KITLG
SNPs	5	18056066	G	A	intron_variant	KITLG
SNPs	5	18056067	T	C	intron_variant	KITLG
SNPs	5	18056171	T	C	intron_variant	KITLG
SNPs	5	18056172	G	A	intron_variant	KITLG
SNPs	5	18056245	A	G	intron_variant	KITLG
SNPs	5	18056454	T	C	intron_variant	KITLG
SNPs	5	18056524	A	G	intron_variant	KITLG
SNPs	5	18056573	C	A	intron_variant	KITLG
SNPs	5	18056732	A	G	intron_variant	KITLG
SNPs	5	18056748	C	G	intron_variant	KITLG
SNPs	5	18056792	G	A	intron_variant	KITLG
SNPs	5	18056840	C	A	intron_variant	KITLG
SNPs	5	18057003	C	T	intron_variant	KITLG
SNPs	5	18057010	T	C	intron_variant	KITLG
SNPs	5	18057124	A	T	intron_variant	KITLG
SNPs	5	18057165	G	A	intron_variant	KITLG
SNPs	5	18057379	A	G	intron_variant	KITLG
SNPs	5	18057400	A	G	intron_variant	KITLG
SNPs	5	18057497	G	A	intron_variant	KITLG
SNPs	5	18057554	C	T	intron_variant	KITLG
SNPs	5	18057580	C	T	intron_variant	KITLG
SNPs	5	18057589	T	G	intron_variant	KITLG
SNPs	5	18057661	C	A	intron_variant	KITLG
SNPs	5	18057668	C	T	intron_variant	KITLG
SNPs	5	18057737	A	G	intron_variant	KITLG
SNPs	5	18057815	G	T	intron_variant	KITLG
SNPs	5	18057834	C	G	intron_variant	KITLG
SNPs	5	18058134	G	A	intron_variant	KITLG
SNPs	5	18058385	C	A	intron_variant	KITLG
SNPs	5	18058579	A	C	intron_variant	KITLG
SNPs	5	18058782	A	G	intron_variant	KITLG
SNPs	5	18058834	T	C	intron_variant	KITLG
SNPs	5	18058835	C	T	intron_variant	KITLG
SNPs	5	18058861	A	T	intron_variant	KITLG
SNPs	5	18058902	T	C	intron_variant	KITLG
SNPs	5	18058932	T	C	intron_variant	KITLG
SNPs	5	18058948	C	T	intron_variant	KITLG
SNPs	5	18059121	G	A	intron_variant	KITLG
SNPs	5	18059142	A	G	intron_variant	KITLG
SNPs	5	18059160	G	A	intron_variant	KITLG
SNPs	5	18059396	G	C	intron_variant	KITLG
SNPs	5	18059438	A	C	intron_variant	KITLG
SNPs	5	18059482	G	C,T	intron_variant	KITLG
SNPs	5	18059580	T	G	intron_variant	KITLG
SNPs	5	18059606	C	A	intron_variant	KITLG
SNPs	5	18059860	T	G	intron_variant	KITLG
SNPs	5	18059895	A	G	intron_variant	KITLG
SNPs	5	18060002	T	C	intron_variant	KITLG
SNPs	5	18060073	T	C	intron_variant	KITLG
SNPs	5	18060148	T	C	intron_variant	KITLG
SNPs	5	18060196	A	C	intron_variant	KITLG
SNPs	5	18060224	T	C	intron_variant	KITLG
SNPs	5	18060351	A	G	intron_variant	KITLG
SNPs	5	18060404	G	A	intron_variant	KITLG
SNPs	5	18060603	T	C	intron_variant	KITLG
SNPs	5	18060616	G	A	intron_variant	KITLG
SNPs	5	18060660	G	T	intron_variant	KITLG
SNPs	5	18060829	G	C	intron_variant	KITLG
SNPs	5	18061081	C	G	intron_variant	KITLG
SNPs	5	18061118	G	T	intron_variant	KITLG
SNPs	5	18061238	G	A	intron_variant	KITLG
SNPs	5	18061275	A	C	intron_variant	KITLG
SNPs	5	18061347	G	A	intron_variant	KITLG
SNPs	5	18061413	T	C	intron_variant	KITLG
SNPs	5	18061632	A	C	intron_variant	KITLG
SNPs	5	18061946	T	C	intron_variant	KITLG
SNPs	5	18061994	T	C	intron_variant	KITLG
SNPs	5	18061999	G	A	intron_variant	KITLG
SNPs	5	18062174	A	C	intron_variant	KITLG
SNPs	5	18062235	G	A	intron_variant	KITLG
SNPs	5	18062237	T	C	intron_variant	KITLG
SNPs	5	18062264	G	A	intron_variant	KITLG
SNPs	5	18062771	C	T	intron_variant	KITLG
SNPs	5	18062817	T	C	intron_variant	KITLG
SNPs	5	18062911	G	T	intron_variant	KITLG
SNPs	5	18063150	C	A	intron_variant	KITLG
SNPs	5	18063616	G	A	intron_variant	KITLG
SNPs	5	18063634	C	T	intron_variant	KITLG
SNPs	5	18063759	C	T	intron_variant	KITLG
SNPs	5	18063768	T	C	intron_variant	KITLG
SNPs	5	18063882	C	T	intron_variant	KITLG
SNPs	5	18063924	C	T	intron_variant	KITLG
SNPs	5	18063978	C	T	intron_variant	KITLG
SNPs	5	18064040	G	T	intron_variant	KITLG
SNPs	5	18064878	A	G	intron_variant	KITLG
SNPs	5	18065107	A	G	intron_variant	KITLG
SNPs	5	18065160	C	T	intron_variant	KITLG
SNPs	5	18065226	C	G	intron_variant	KITLG
SNPs	5	18065233	A	T	intron_variant	KITLG
SNPs	5	18065254	A	G	intron_variant	KITLG
SNPs	5	18065347	C	A	intron_variant	KITLG
SNPs	5	18065366	A	C	intron_variant	KITLG
SNPs	5	18065599	A	G	intron_variant	KITLG
SNPs	5	18065612	G	A	intron_variant	KITLG
SNPs	5	18066107	C	T	intron_variant	KITLG
SNPs	5	18066191	A	C	intron_variant	KITLG
SNPs	5	18066291	A	T	intron_variant	KITLG
SNPs	5	18066386	C	G	intron_variant	KITLG
SNPs	5	18066627	A	T	intron_variant	KITLG
SNPs	5	18066673	C	T	intron_variant	KITLG
SNPs	5	18067129	G	A	intron_variant	KITLG
SNPs	5	18067193	C	T	intron_variant	KITLG
SNPs	5	18067214	G	A	intron_variant	KITLG
SNPs	5	18067301	G	C	intron_variant	KITLG
SNPs	5	18067608	T	A	intron_variant	KITLG
SNPs	5	18067787	C	G	intron_variant	KITLG
SNPs	5	18067832	C	T	intron_variant	KITLG
SNPs	5	18067866	G	C	intron_variant	KITLG
SNPs	5	18067974	C	G	intron_variant	KITLG
SNPs	5	18067980	A	G	intron_variant	KITLG
SNPs	5	18068003	C	G	intron_variant	KITLG
SNPs	5	18068004	A	G	intron_variant	KITLG
SNPs	5	18068039	C	T	intron_variant	KITLG
SNPs	5	18068055	T	G	intron_variant	KITLG
SNPs	5	18068107	A	T,*	intron_variant	KITLG
SNPs	5	18068108	A	T	intron_variant	KITLG
SNPs	5	18068207	T	C	intron_variant	KITLG
SNPs	5	18068342	T	C	intron_variant	KITLG
SNPs	5	18068405	C	T	intron_variant	KITLG
SNPs	5	18068688	C	T	intron_variant	KITLG
SNPs	5	18068744	T	C	intron_variant	KITLG
SNPs	5	18068759	C	T	intron_variant	KITLG
SNPs	5	18068797	T	C	intron_variant	KITLG
SNPs	5	18068944	A	G	intron_variant	KITLG
SNPs	5	18068950	T	C	intron_variant	KITLG
SNPs	5	18069176	G	C	intron_variant	KITLG
SNPs	5	18069194	T	G	intron_variant	KITLG
SNPs	5	18069195	T	G	intron_variant	KITLG
SNPs	5	18069212	C	T	intron_variant	KITLG
SNPs	5	18069288	G	C	intron_variant	KITLG
SNPs	5	18069528	A	G	intron_variant	KITLG
SNPs	5	18069561	C	T	intron_variant	KITLG
SNPs	5	18069640	T	A	intron_variant	KITLG
SNPs	5	18069654	A	T,*	intron_variant	KITLG
SNPs	5	18069715	T	C	intron_variant	KITLG
SNPs	5	18069902	A	G	intron_variant	KITLG
SNPs	5	18069955	C	T	intron_variant	KITLG
SNPs	5	18069958	T	C	intron_variant	KITLG
SNPs	5	18069978	C	A	intron_variant	KITLG
SNPs	5	18070115	G	A	intron_variant	KITLG
SNPs	5	18070186	T	C	intron_variant	KITLG
SNPs	5	18070291	C	T	intron_variant	KITLG
SNPs	5	18070294	T	A	intron_variant	KITLG
SNPs	5	18070332	A	G	intron_variant	KITLG
SNPs	5	18070384	C	T	intron_variant	KITLG
SNPs	5	18070389	G	T	intron_variant	KITLG
SNPs	5	18070427	G	A	intron_variant	KITLG
SNPs	5	18070503	C	T	intron_variant	KITLG
SNPs	5	18070504	T	C	intron_variant	KITLG
SNPs	5	18070508	G	A	intron_variant	KITLG
SNPs	5	18070511	G	C	intron_variant	KITLG
SNPs	5	18070514	G	A	intron_variant	KITLG
SNPs	5	18070533	G	T	intron_variant	KITLG
SNPs	5	18070543	G	A	intron_variant	KITLG
SNPs	5	18070590	C	T	intron_variant	KITLG
SNPs	5	18070591	A	G	intron_variant	KITLG
SNPs	5	18070611	C	T	intron_variant	KITLG
SNPs	5	18070932	A	T	intron_variant	KITLG
SNPs	5	18071123	T	C	intron_variant	KITLG
SNPs	5	18071185	G	A	intron_variant	KITLG
SNPs	5	18071233	T	C	intron_variant	KITLG
SNPs	5	18071383	A	G	intron_variant	KITLG
SNPs	5	18071479	C	T	intron_variant	KITLG
SNPs	5	18071578	A	C	intron_variant	KITLG
SNPs	5	18071595	A	G	intron_variant	KITLG
SNPs	5	18071671	G	C	intron_variant	KITLG
SNPs	5	18071685	C	T	intron_variant	KITLG
SNPs	5	18071703	T	C	intron_variant	KITLG
SNPs	5	18071742	C	T	intron_variant	KITLG
SNPs	5	18071754	C	T	intron_variant	KITLG
SNPs	5	18071781	C	T	intron_variant	KITLG
SNPs	5	18071829	T	C	intron_variant	KITLG
SNPs	5	18071887	T	C	intron_variant	KITLG
SNPs	5	18071905	C	T	intron_variant	KITLG
SNPs	5	18072075	C	A	intron_variant	KITLG
SNPs	5	18072101	T	C	intron_variant	KITLG
SNPs	5	18072176	T	G	intron_variant	KITLG
SNPs	5	18072273	A	G	intron_variant	KITLG
SNPs	5	18072329	T	C	intron_variant	KITLG
SNPs	5	18072457	C	A	intron_variant	KITLG
SNPs	5	18072548	C	G	intron_variant	KITLG
SNPs	5	18072588	C	A	intron_variant	KITLG
SNPs	5	18072699	T	C	intron_variant	KITLG
SNPs	5	18072709	T	C	intron_variant	KITLG
SNPs	5	18072731	C	T	intron_variant	KITLG
SNPs	5	18072747	G	A	intron_variant	KITLG
SNPs	5	18072930	A	G	intron_variant	KITLG
SNPs	5	18072949	T	C	intron_variant	KITLG
SNPs	5	18073008	T	C	intron_variant	KITLG
SNPs	5	18073106	A	G	intron_variant	KITLG
SNPs	5	18073223	T	C	intron_variant	KITLG
SNPs	5	18073237	G	C	intron_variant	KITLG
SNPs	5	18073275	C	A	intron_variant	KITLG
SNPs	5	18073277	G	C	intron_variant	KITLG
SNPs	5	18073313	T	C	intron_variant	KITLG
SNPs	5	18073316	T	C	intron_variant	KITLG
SNPs	5	18073375	C	T	intron_variant	KITLG
SNPs	5	18073418	T	C	intron_variant	KITLG
SNPs	5	18073438	T	C	intron_variant	KITLG
SNPs	5	18073471	G	T	intron_variant	KITLG
SNPs	5	18073554	T	C	intron_variant	KITLG
SNPs	5	18073581	A	G	intron_variant	KITLG
SNPs	5	18073611	C	A	intron_variant	KITLG
SNPs	5	18073659	A	G	intron_variant	KITLG
SNPs	5	18073737	T	C	intron_variant	KITLG
SNPs	5	18073816	T	C	intron_variant	KITLG
SNPs	5	18073859	G	A	intron_variant	KITLG
SNPs	5	18073878	T	C	intron_variant	KITLG
SNPs	5	18073961	C	T	intron_variant	KITLG
SNPs	5	18073987	C	T	intron_variant	KITLG
SNPs	5	18073988	A	G	intron_variant	KITLG
SNPs	5	18074017	G	A	intron_variant	KITLG
SNPs	5	18074024	G	A	intron_variant	KITLG
SNPs	5	18074037	T	G	intron_variant	KITLG
SNPs	5	18074049	T	G	intron_variant	KITLG
SNPs	5	18074123	C	T	intron_variant	KITLG
SNPs	5	18074442	C	T	intron_variant	KITLG
SNPs	5	18074509	C	T	intron_variant	KITLG
SNPs	5	18074605	C	T	intron_variant	KITLG
SNPs	5	18074788	G	T	intron_variant	KITLG
SNPs	5	18074939	G	A	intron_variant	KITLG
SNPs	5	18074980	C	T	intron_variant	KITLG
SNPs	5	18075013	G	A	intron_variant	KITLG
SNPs	5	18075245	C	T	intron_variant	KITLG
SNPs	5	18075349	G	C	intron_variant	KITLG
SNPs	5	18075368	T	A	intron_variant	KITLG
SNPs	5	18075369	G	A	intron_variant	KITLG
SNPs	5	18075392	G	A	intron_variant	KITLG
SNPs	5	18075486	T	G	intron_variant	KITLG
SNPs	5	18075544	T	C	intron_variant	KITLG
SNPs	5	18075556	A	G	intron_variant	KITLG
SNPs	5	18075588	T	C	intron_variant	KITLG
SNPs	5	18075600	C	T	intron_variant	KITLG
SNPs	5	18075651	C	A	intron_variant	KITLG
SNPs	5	18075712	C	T	intron_variant	KITLG
SNPs	5	18075722	A	G	intron_variant	KITLG
SNPs	5	18075766	A	G	intron_variant	KITLG
SNPs	5	18075840	T	C	intron_variant	KITLG
SNPs	5	18075844	G	A	intron_variant	KITLG
SNPs	5	18075845	G	T	intron_variant	KITLG
SNPs	5	18075915	C	T	intron_variant	KITLG
SNPs	5	18075973	C	T	intron_variant	KITLG
SNPs	5	18076098	T	C	intron_variant	KITLG
SNPs	5	18076246	T	C	intron_variant	KITLG
SNPs	5	18076454	T	G	intron_variant	KITLG
SNPs	5	18076616	T	C	intron_variant	KITLG
SNPs	5	18076624	T	C	intron_variant	KITLG
SNPs	5	18076714	C	T	intron_variant	KITLG
SNPs	5	18076907	A	G	intron_variant	KITLG
SNPs	5	18076929	A	C	intron_variant	KITLG
SNPs	5	18077099	T	C	intron_variant	KITLG
SNPs	5	18077107	A	G	intron_variant	KITLG
SNPs	5	18077162	A	G	intron_variant	KITLG
SNPs	5	18077224	C	T	intron_variant	KITLG
SNPs	5	18077448	A	G	intron_variant	KITLG
SNPs	5	18077522	G	A	intron_variant	KITLG
SNPs	5	18077779	A	C	intron_variant	KITLG
SNPs	5	18078051	A	G	intron_variant	KITLG
SNPs	5	18078067	C	T	intron_variant	KITLG
SNPs	5	18078358	A	G	intron_variant	KITLG
SNPs	5	18078452	A	T	intron_variant	KITLG
SNPs	5	18078651	C	T	intron_variant	KITLG
SNPs	5	18078664	T	C	intron_variant	KITLG
SNPs	5	18078871	C	T	intron_variant	KITLG
SNPs	5	18078874	T	C	intron_variant	KITLG
SNPs	5	18079032	G	A	intron_variant	KITLG
SNPs	5	18079131	T	A	intron_variant	KITLG
SNPs	5	18079155	A	G	intron_variant	KITLG
SNPs	5	18079173	T	C	intron_variant	KITLG
SNPs	5	18079210	T	C	intron_variant	KITLG
SNPs	5	18079287	G	A	intron_variant	KITLG
SNPs	5	18079350	A	T	intron_variant	KITLG
SNPs	5	18079464	C	T	intron_variant	KITLG
SNPs	5	18079642	G	A	intron_variant	KITLG
SNPs	5	18079656	C	T	intron_variant	KITLG
SNPs	5	18079696	A	T	intron_variant	KITLG
SNPs	5	18079913	G	A	intron_variant	KITLG
SNPs	5	18079916	C	T	intron_variant	KITLG
SNPs	5	18080012	G	C	intron_variant	KITLG
SNPs	5	18080173	A	G	intron_variant	KITLG
SNPs	5	18080298	T	G	intron_variant	KITLG
SNPs	5	18080474	T	C	intron_variant	KITLG
SNPs	5	18080542	C	A	intron_variant	KITLG
SNPs	5	18080704	C	A	intron_variant	KITLG
SNPs	5	18080916	C	T	intron_variant	KITLG
SNPs	5	18080971	T	C	intron_variant	KITLG
SNPs	5	18080994	G	A	intron_variant	KITLG
SNPs	5	18081041	C	T	intron_variant	KITLG
SNPs	5	18081184	T	C	intron_variant	KITLG
SNPs	5	18081234	A	G	intron_variant	KITLG
SNPs	5	18081279	T	C	intron_variant	KITLG
SNPs	5	18081421	A	G	intron_variant	KITLG
SNPs	5	18081425	C	T	intron_variant	KITLG
SNPs	5	18081547	T	C	intron_variant	KITLG
SNPs	5	18081615	A	G	intron_variant	KITLG
SNPs	5	18081643	G	A	intron_variant	KITLG
SNPs	5	18081776	C	A	intron_variant	KITLG
SNPs	5	18081779	A	G	intron_variant	KITLG
SNPs	5	18081873	C	G	intron_variant	KITLG
SNPs	5	18081878	T	C	intron_variant	KITLG
SNPs	5	18082043	C	T	intron_variant	KITLG
SNPs	5	18082187	C	T	intron_variant	KITLG
SNPs	5	18082294	C	T	intron_variant	KITLG
SNPs	5	18082314	C	A	intron_variant	KITLG
SNPs	5	18082413	A	G	intron_variant	KITLG
SNPs	5	18082437	A	T	intron_variant	KITLG
SNPs	5	18082438	T	A	intron_variant	KITLG
SNPs	5	18082474	A	G	intron_variant	KITLG
SNPs	5	18082684	G	A	intron_variant	KITLG
SNPs	5	18082784	T	C	intron_variant	KITLG
SNPs	5	18082793	G	C	intron_variant	KITLG
SNPs	5	18082972	T	C	intron_variant	KITLG
SNPs	5	18082987	A	G	intron_variant	KITLG
SNPs	5	18083164	A	G	intron_variant	KITLG
SNPs	5	18083181	G	T	intron_variant	KITLG
SNPs	5	18083577	T	C	intron_variant	KITLG
SNPs	5	18083591	T	C	intron_variant	KITLG
SNPs	5	18083592	G	A	intron_variant	KITLG
SNPs	5	18083770	T	C	intron_variant	KITLG
SNPs	5	18083784	A	G	intron_variant	KITLG
SNPs	5	18083918	C	A	intron_variant	KITLG
SNPs	5	18083945	T	C	intron_variant	KITLG
SNPs	5	18083992	T	C	intron_variant	KITLG
SNPs	5	18084026	A	G	intron_variant	KITLG
SNPs	5	18084207	C	T	intron_variant	KITLG
SNPs	5	18084213	G	A	intron_variant	KITLG
SNPs	5	18084401	C	G	intron_variant	KITLG
SNPs	5	18084557	T	C	intron_variant	KITLG
SNPs	5	18084669	A	T	intron_variant	KITLG
SNPs	5	18084702	G	T	intron_variant	KITLG
SNPs	5	18084776	C	A	intron_variant	KITLG
SNPs	5	18084927	A	G	intron_variant	KITLG
SNPs	5	18084945	A	G	intron_variant	KITLG
SNPs	5	18085026	C	A	intron_variant	KITLG
SNPs	5	18085035	A	G	intron_variant	KITLG
SNPs	5	18085087	A	C	intron_variant	KITLG
SNPs	5	18086792	C	A	intron_variant	KITLG
SNPs	5	18086844	G	A	intron_variant	KITLG
SNPs	5	18086931	A	G	intron_variant	KITLG
SNPs	5	18086986	C	A	intron_variant	KITLG
SNPs	5	18087150	A	G	intron_variant	KITLG
SNPs	5	18087210	T	C	intron_variant	KITLG
SNPs	5	18087236	G	A	intron_variant	KITLG
SNPs	5	18087361	G	A	intron_variant	KITLG
SNPs	5	18087384	T	C	intron_variant	KITLG
SNPs	5	18087385	G	A	intron_variant	KITLG
SNPs	5	18087410	T	G	intron_variant	KITLG
SNPs	5	18087412	T	C	intron_variant	KITLG
SNPs	5	18087422	G	T	intron_variant	KITLG
SNPs	5	18087786	T	C	intron_variant	KITLG
SNPs	5	18087791	A	C	intron_variant	KITLG
SNPs	5	18087793	C	T	intron_variant	KITLG
SNPs	5	18087809	T	C	intron_variant	KITLG
SNPs	5	18087859	A	C	intron_variant	KITLG
SNPs	5	18087876	T	C	intron_variant	KITLG
SNPs	5	18087892	T	A	intron_variant	KITLG
SNPs	5	18087985	T	C	intron_variant	KITLG
SNPs	5	18087989	C	A	intron_variant	KITLG
SNPs	5	18088013	C	T	intron_variant	KITLG
SNPs	5	18088017	G	A	intron_variant	KITLG
SNPs	5	18088057	G	A	intron_variant	KITLG
SNPs	5	18088136	G	A	intron_variant	KITLG
SNPs	5	18088172	G	T	intron_variant	KITLG
SNPs	5	18088242	C	T	intron_variant	KITLG
SNPs	5	18088276	G	A	intron_variant	KITLG
SNPs	5	18088297	G	A	intron_variant	KITLG
SNPs	5	18088312	G	A	intron_variant	KITLG
SNPs	5	18088589	A	G	intron_variant	KITLG
SNPs	5	18088623	G	A	intron_variant	KITLG
SNPs	5	18088651	T	A	intron_variant	KITLG
SNPs	5	18088705	G	A	intron_variant	KITLG
SNPs	5	18088717	A	T	intron_variant	KITLG
SNPs	5	18088737	A	G	intron_variant	KITLG
SNPs	5	18088746	A	T	intron_variant	KITLG
SNPs	5	18088749	G	A	intron_variant	KITLG
SNPs	5	18088763	A	G	intron_variant	KITLG
SNPs	5	18088802	T	C	intron_variant	KITLG
SNPs	5	18088803	G	A	intron_variant	KITLG
SNPs	5	18088828	A	T	intron_variant	KITLG
SNPs	5	18088861	T	C	intron_variant	KITLG
SNPs	5	18088862	T	A	intron_variant	KITLG
SNPs	5	18088911	T	C	intron_variant	KITLG
SNPs	5	18088914	A	G	intron_variant	KITLG
SNPs	5	18088919	T	C	intron_variant	KITLG
SNPs	5	18088956	G	A	intron_variant	KITLG
SNPs	5	18088962	G	A	intron_variant	KITLG
SNPs	5	18088963	G	C	intron_variant	KITLG
SNPs	5	18089004	T	C	intron_variant	KITLG
SNPs	5	18089212	G	C	intron_variant	KITLG
SNPs	5	18089220	A	G	intron_variant	KITLG
SNPs	5	18089222	G	A	intron_variant	KITLG
SNPs	5	18089241	T	A	intron_variant	KITLG
SNPs	5	18089271	C	T	intron_variant	KITLG
SNPs	5	18089305	A	G	intron_variant	KITLG
SNPs	5	18089309	T	C	intron_variant	KITLG
SNPs	5	18089407	C	T	intron_variant	KITLG
SNPs	5	18089409	A	G	intron_variant	KITLG
SNPs	5	18089420	A	T	intron_variant	KITLG
SNPs	5	18089428	A	G	intron_variant	KITLG
SNPs	5	18089564	C	T	intron_variant	KITLG
SNPs	5	18089593	T	C	intron_variant	KITLG
SNPs	5	18089604	T	C	intron_variant	KITLG
SNPs	5	18089612	G	C	intron_variant	KITLG
SNPs	5	18089726	C	T	intron_variant	KITLG
SNPs	5	18089861	T	A	intron_variant	KITLG
SNPs	5	18090185	C	T	intron_variant	KITLG
SNPs	5	18090274	T	A	intron_variant	KITLG
SNPs	5	18090415	C	T	intron_variant	KITLG
SNPs	5	18090440	C	A	intron_variant	KITLG
SNPs	5	18090591	A	G	intron_variant	KITLG
SNPs	5	18090852	T	C	intron_variant	KITLG
SNPs	5	18090905	G	A	intron_variant	KITLG
SNPs	5	18090917	G	A	intron_variant	KITLG
SNPs	5	18090942	C	T	intron_variant	KITLG
SNPs	5	18091190	T	A	intron_variant	KITLG
SNPs	5	18091220	T	C	intron_variant	KITLG
SNPs	5	18091404	A	G	intron_variant	KITLG
SNPs	5	18091485	G	A	intron_variant	KITLG
SNPs	5	18091534	T	G	intron_variant	KITLG
SNPs	5	18091562	C	T	intron_variant	KITLG
SNPs	5	18091644	A	C	intron_variant	KITLG
SNPs	5	18091650	T	C	intron_variant	KITLG
SNPs	5	18091739	T	C	intron_variant	KITLG
SNPs	5	18091761	G	A	intron_variant	KITLG
SNPs	5	18091791	G	A	intron_variant	KITLG
SNPs	5	18091846	C	A	intron_variant	KITLG
SNPs	5	18091951	G	C	intron_variant	KITLG
SNPs	5	18091965	T	G	intron_variant	KITLG
SNPs	5	18092095	A	G	intron_variant	KITLG
SNPs	5	18092130	A	C	intron_variant	KITLG
SNPs	5	18092153	G	T	intron_variant	KITLG
SNPs	5	18092189	C	A	intron_variant	KITLG
SNPs	5	18092190	G	A	intron_variant	KITLG
SNPs	5	18092417	T	C	intron_variant	KITLG
SNPs	5	18092478	C	T	intron_variant	KITLG
SNPs	5	18092530	G	T	intron_variant	KITLG
SNPs	5	18092536	T	C	intron_variant	KITLG
SNPs	5	18092540	C	T	intron_variant	KITLG
SNPs	5	18092766	C	G	intron_variant	KITLG
SNPs	5	18092770	C	A	intron_variant	KITLG
SNPs	5	18092911	C	A	intron_variant	KITLG
SNPs	5	18093104	A	G	intron_variant	KITLG
SNPs	5	18093423	A	G	intron_variant	KITLG
SNPs	5	18093575	A	G	intron_variant	KITLG
SNPs	5	18093585	G	A	intron_variant	KITLG
SNPs	5	18093722	T	C	intron_variant	KITLG
SNPs	5	18093735	T	C	intron_variant	KITLG
SNPs	5	18094046	A	T	intron_variant	KITLG
SNPs	5	18094336	T	A	intron_variant	KITLG
SNPs	5	18094370	A	G	intron_variant	KITLG
SNPs	5	18094380	C	T	intron_variant	KITLG
SNPs	5	18094413	T	C	intron_variant	KITLG
SNPs	5	18094465	C	T	intron_variant	KITLG
SNPs	5	18094560	A	G	intron_variant	KITLG
SNPs	5	18094916	C	T	intron_variant	KITLG
SNPs	5	18094987	A	G	intron_variant	KITLG
SNPs	5	18095250	T	C	intron_variant	KITLG
SNPs	5	18095428	T	A	intron_variant	KITLG
SNPs	5	18095553	T	C	intron_variant	KITLG
SNPs	5	18095570	G	C	intron_variant	KITLG
SNPs	5	18095874	G	A	intron_variant	KITLG
SNPs	5	18096008	A	G	intron_variant	KITLG
SNPs	5	18096079	C	T	intron_variant	KITLG
SNPs	5	18096120	T	C	intron_variant	KITLG
SNPs	5	18096134	A	C	intron_variant	KITLG
SNPs	5	18096419	G	A	intron_variant	KITLG
SNPs	5	18096468	G	T	intron_variant	KITLG
SNPs	5	18096909	G	A	intron_variant	KITLG
SNPs	5	18096947	G	A	intron_variant	KITLG
SNPs	5	18096966	G	A	intron_variant	KITLG
SNPs	5	18097010	T	C	intron_variant	KITLG
SNPs	5	18097049	G	A	intron_variant	KITLG
SNPs	5	18097064	T	C	intron_variant	KITLG
SNPs	5	18097152	C	T	intron_variant	KITLG
SNPs	5	18097189	T	C	intron_variant	KITLG
SNPs	5	18097343	C	T	intron_variant	KITLG
SNPs	5	18097514	T	C	intron_variant	KITLG
SNPs	5	18097562	C	A	intron_variant	KITLG
SNPs	5	18097641	G	A	intron_variant	KITLG
SNPs	5	18097777	C	T	intron_variant	KITLG
SNPs	5	18097814	G	A	intron_variant	KITLG
SNPs	5	18097847	G	T	intron_variant	KITLG
SNPs	5	18097992	T	C	intron_variant	KITLG
SNPs	5	18098033	G	A	intron_variant	KITLG
SNPs	5	18098066	A	G	intron_variant	KITLG
SNPs	5	18098069	C	T	intron_variant	KITLG
SNPs	5	18098078	C	T	intron_variant	KITLG
SNPs	5	18098086	G	C	intron_variant	KITLG
SNPs	5	18098208	T	C	intron_variant	KITLG
SNPs	5	18098215	C	T	intron_variant	KITLG
SNPs	5	18098318	G	T	intron_variant	KITLG
SNPs	5	18098385	C	T	intron_variant	KITLG
SNPs	5	18098415	G	C	intron_variant	KITLG
SNPs	5	18098836	G	T	intron_variant	KITLG
SNPs	5	18099064	T	C	intron_variant	KITLG
SNPs	5	18099088	T	G	intron_variant	KITLG
SNPs	5	18099095	T	C	intron_variant	KITLG
SNPs	5	18099176	C	T	intron_variant	KITLG
SNPs	5	18099244	C	T	intron_variant	KITLG
SNPs	5	18099261	C	A	intron_variant	KITLG
SNPs	5	18099764	C	G	intron_variant	KITLG
SNPs	5	18099765	A	G	intron_variant	KITLG
SNPs	5	18099794	A	G	intron_variant	KITLG
SNPs	5	18099976	A	T	intron_variant	KITLG
SNPs	5	18100004	A	G	intron_variant	KITLG
SNPs	5	18100011	C	T	intron_variant	KITLG
SNPs	5	18100015	C	T	intron_variant	KITLG
SNPs	5	18100063	A	G	intron_variant	KITLG
SNPs	5	18100231	G	A	intron_variant	KITLG
SNPs	5	18100324	T	C	intron_variant	KITLG
SNPs	5	18100346	G	A	intron_variant	KITLG
SNPs	5	18100354	A	G	intron_variant	KITLG
SNPs	5	18100411	C	T	intron_variant	KITLG
SNPs	5	18100441	C	A	intron_variant	KITLG
SNPs	5	18100458	C	G	intron_variant	KITLG
SNPs	5	18100520	G	A	intron_variant	KITLG
SNPs	5	18100684	C	T	intron_variant	KITLG
SNPs	5	18100749	A	G	intron_variant	KITLG
SNPs	5	18100796	T	C	intron_variant	KITLG
SNPs	5	18100989	G	A	intron_variant	KITLG
SNPs	5	18101175	T	C	intron_variant	KITLG
SNPs	5	18101315	G	A	intron_variant	KITLG
SNPs	5	18101380	G	A	intron_variant	KITLG
SNPs	5	18101977	C	T	intron_variant	KITLG
SNPs	5	18102018	T	C	intron_variant	KITLG
SNPs	5	18102066	C	T	intron_variant	KITLG
SNPs	5	18102110	C	T	intron_variant	KITLG
SNPs	5	18102459	A	C	intron_variant	KITLG
SNPs	5	18102582	G	A	intron_variant	KITLG
SNPs	5	18102627	C	A	intron_variant	KITLG
SNPs	5	18102693	T	G	intron_variant	KITLG
SNPs	5	18102782	T	C	intron_variant	KITLG
SNPs	5	18102800	T	C	intron_variant	KITLG
SNPs	5	18102844	A	G	intron_variant	KITLG
SNPs	5	18103216	C	T	intron_variant	KITLG
SNPs	5	18103471	G	A	intron_variant	KITLG
SNPs	5	18103534	C	T	intron_variant	KITLG
SNPs	5	18103653	G	A	intron_variant	KITLG
SNPs	5	18103836	G	A	intron_variant	KITLG
SNPs	5	18104493	C	G	intron_variant	KITLG
SNPs	5	18104530	T	C	intron_variant	KITLG
SNPs	5	18104612	T	C	intron_variant	KITLG
SNPs	5	18104632	G	A	intron_variant	KITLG
SNPs	5	18104706	A	G	intron_variant	KITLG
SNPs	5	18104914	C	T	intron_variant	KITLG
SNPs	5	18105000	G	C	intron_variant	KITLG
SNPs	5	18105041	T	C	intron_variant	KITLG
SNPs	5	18105344	G	A	intron_variant	KITLG
SNPs	5	18105412	A	T	intron_variant	KITLG
SNPs	5	18105526	C	A	intron_variant	KITLG
SNPs	5	18105527	A	T	intron_variant	KITLG
SNPs	5	18105584	T	C	intron_variant	KITLG
SNPs	5	18105646	C	G	intron_variant	KITLG
SNPs	5	18105841	C	G	intron_variant	KITLG
SNPs	5	18105881	C	T	intron_variant	KITLG
SNPs	5	18106180	C	T	intron_variant	KITLG
SNPs	5	18106191	G	A	intron_variant	KITLG
SNPs	5	18106215	T	A	intron_variant	KITLG
SNPs	5	18106265	T	C	intron_variant	KITLG
SNPs	5	18106266	G	A	intron_variant	KITLG
SNPs	5	18106733	T	C	intron_variant	KITLG
SNPs	5	18106804	C	T	intron_variant	KITLG
SNPs	5	18106854	T	C	intron_variant	KITLG
SNPs	5	18106896	C	T	intron_variant	KITLG
SNPs	5	18107122	C	T	intron_variant	KITLG
SNPs	5	18107380	A	G	intron_variant	KITLG
SNPs	5	18107426	C	A	intron_variant	KITLG
SNPs	5	18107611	A	C	intron_variant	KITLG
SNPs	5	18107612	T	C	intron_variant	KITLG
SNPs	5	18107625	T	C	intron_variant	KITLG
SNPs	5	18107940	A	G	intron_variant	KITLG
SNPs	5	18108776	C	T	intron_variant	KITLG
SNPs	5	18108942	C	T	intron_variant	KITLG
SNPs	5	18109062	T	C	intron_variant	KITLG
SNPs	5	18109265	T	C	intron_variant	KITLG
SNPs	5	18109327	C	T	intron_variant	KITLG
SNPs	5	18109496	T	C	intron_variant	KITLG
SNPs	5	18109994	G	C	intron_variant	KITLG
SNPs	5	18110001	T	G	intron_variant	KITLG
SNPs	5	18110014	T	A	intron_variant	KITLG
SNPs	5	18110072	G	A	intron_variant	KITLG
SNPs	5	18110136	A	C	intron_variant	KITLG
SNPs	5	18110212	C	G	intron_variant	KITLG
SNPs	5	18110225	T	G	intron_variant	KITLG
SNPs	5	18110244	C	T	intron_variant	KITLG
SNPs	5	18110282	A	C	intron_variant	KITLG
SNPs	5	18110363	A	C	intron_variant	KITLG
SNPs	5	18110381	G	C	intron_variant	KITLG
SNPs	5	18110384	A	C	intron_variant	KITLG
SNPs	5	18110395	C	T	intron_variant	KITLG
SNPs	5	18110407	C	G	intron_variant	KITLG
SNPs	5	18110529	G	C	intron_variant	KITLG
SNPs	5	18110657	A	T	intron_variant	KITLG
SNPs	5	18110794	A	G	intron_variant	KITLG
SNPs	5	18110803	C	A	intron_variant	KITLG
SNPs	5	18110808	A	C	intron_variant	KITLG
SNPs	5	18110844	G	A	intron_variant	KITLG
SNPs	5	18110850	T	C	intron_variant	KITLG
SNPs	5	18110980	G	A	intron_variant	KITLG
SNPs	5	18110991	T	C	intron_variant	KITLG
SNPs	5	18111095	T	A	missense_variant	KITLG
SNPs	5	18111255	T	C	intron_variant	KITLG
SNPs	5	18111423	T	C	intron_variant	KITLG
SNPs	5	18111679	T	C	intron_variant	KITLG
SNPs	5	18111716	C	T	intron_variant	KITLG
SNPs	5	18111743	A	T	intron_variant	KITLG
SNPs	5	18111946	C	A	intron_variant	KITLG
SNPs	5	18112098	T	C	intron_variant	KITLG
SNPs	5	18112154	G	C	intron_variant	KITLG
SNPs	5	18112168	G	A	intron_variant	KITLG
SNPs	5	18112183	T	C	intron_variant	KITLG
SNPs	5	18112428	T	C	intron_variant	KITLG
SNPs	5	18112593	C	T	intron_variant	KITLG
SNPs	5	18112623	A	G	intron_variant	KITLG
SNPs	5	18112644	A	G	intron_variant	KITLG
SNPs	5	18112819	T	C	intron_variant	KITLG
SNPs	5	18112820	T	C	intron_variant	KITLG
SNPs	5	18112822	G	A	intron_variant	KITLG
SNPs	5	18112938	C	T	intron_variant	KITLG
SNPs	5	18112983	G	A	intron_variant	KITLG
SNPs	5	18113010	C	T	intron_variant	KITLG
SNPs	5	18113049	A	G	intron_variant	KITLG
SNPs	5	18113180	C	T	intron_variant	KITLG
SNPs	5	18113493	A	T	intron_variant	KITLG
SNPs	5	18113527	T	C	intron_variant	KITLG
SNPs	5	18113639	G	T	intron_variant	KITLG
SNPs	5	18113679	G	T	intron_variant	KITLG
SNPs	5	18113690	A	C	intron_variant	KITLG
SNPs	5	18113801	T	A	intron_variant	KITLG
SNPs	5	18113847	G	A	intron_variant	KITLG
SNPs	5	18113948	G	A	intron_variant	KITLG
SNPs	5	18114053	A	G	intron_variant	KITLG
SNPs	5	18114161	C	T	intron_variant	KITLG
SNPs	5	18114173	T	C	intron_variant	KITLG
SNPs	5	18114345	T	C	intron_variant	KITLG
SNPs	5	18114491	G	A	intron_variant	KITLG
SNPs	5	18114508	A	C	intron_variant	KITLG
SNPs	5	18114880	C	T	intron_variant	KITLG
SNPs	5	18114912	A	G	intron_variant	KITLG
SNPs	5	18114990	G	A	intron_variant	KITLG
SNPs	5	18115024	G	A	intron_variant	KITLG
SNPs	5	18115078	G	T	intron_variant	KITLG
SNPs	5	18115081	C	T	intron_variant	KITLG
SNPs	5	18115406	T	G	intron_variant	KITLG
SNPs	5	18115491	T	C	intron_variant	KITLG
SNPs	5	18115661	G	T	intron_variant	KITLG
SNPs	5	18115734	T	C	intron_variant	KITLG
SNPs	5	18115758	C	T	intron_variant	KITLG
SNPs	5	18115766	T	C,*	intron_variant	KITLG
SNPs	5	18115767	A	G,*	intron_variant	KITLG
SNPs	5	18115775	C	T	intron_variant	KITLG
SNPs	5	18115782	C	G	intron_variant	KITLG
SNPs	5	18115916	G	A	intron_variant	KITLG
SNPs	5	18116090	C	T	intron_variant	KITLG
SNPs	5	18116128	T	C	intron_variant	KITLG
SNPs	5	18116165	C	G	intron_variant	KITLG
SNPs	5	18116221	T	A	intron_variant	KITLG
SNPs	5	18116404	A	T	intron_variant	KITLG
SNPs	5	18116593	T	C	intron_variant	KITLG
SNPs	5	18116594	G	A	intron_variant	KITLG
SNPs	5	18116811	T	C	intron_variant	KITLG
SNPs	5	18116888	G	A	intron_variant	KITLG
SNPs	5	18116906	C	G	intron_variant	KITLG
SNPs	5	18117384	G	A	intron_variant	KITLG
SNPs	5	18117553	C	T	intron_variant	KITLG
SNPs	5	18117561	C	T	intron_variant	KITLG
SNPs	5	18117615	A	G	intron_variant	KITLG
SNPs	5	18117699	G	A	intron_variant	KITLG
SNPs	5	18117789	A	G	intron_variant	KITLG
SNPs	5	18117905	G	A	intron_variant	KITLG
SNPs	5	18117965	T	C	intron_variant	KITLG
SNPs	5	18117970	C	T	intron_variant	KITLG
SNPs	5	18117991	G	T	intron_variant	KITLG
SNPs	5	18117992	T	A	intron_variant	KITLG
SNPs	5	18117994	C	T	intron_variant	KITLG
SNPs	5	18118096	A	G	intron_variant	KITLG
SNPs	5	18118151	A	C	intron_variant	KITLG
SNPs	5	18118248	G	T	intron_variant	KITLG
SNPs	5	18118454	T	C	intron_variant	KITLG
SNPs	5	18118496	G	A	intron_variant	KITLG
SNPs	5	18118620	A	G	intron_variant	KITLG
SNPs	5	18118623	A	G	intron_variant	KITLG
SNPs	5	18118894	A	G	intron_variant	KITLG
SNPs	5	18118922	T	C	intron_variant	KITLG
SNPs	5	18119063	A	G	intron_variant	KITLG
SNPs	5	18119179	T	C	intron_variant	KITLG
SNPs	5	18119182	A	G	intron_variant	KITLG
SNPs	5	18119414	G	A	intron_variant	KITLG
SNPs	5	18119556	C	T	intron_variant	KITLG
SNPs	5	18119684	G	C	intron_variant	KITLG
SNPs	5	18119685	G	A	intron_variant	KITLG
SNPs	5	18119711	T	C	intron_variant	KITLG
SNPs	5	18119727	A	G	intron_variant	KITLG
SNPs	5	18119822	A	G	intron_variant	KITLG
SNPs	5	18119862	C	A	intron_variant	KITLG
SNPs	5	18119863	T	C	intron_variant	KITLG
SNPs	5	18120039	G	T	intron_variant	KITLG
SNPs	5	18120103	A	G	intron_variant	KITLG
SNPs	5	18120269	T	C	intron_variant	KITLG
SNPs	5	18120280	T	C	intron_variant	KITLG
SNPs	5	18120287	C	G	intron_variant	KITLG
SNPs	5	18120295	C	T	intron_variant	KITLG
SNPs	5	18120426	G	A	intron_variant	KITLG
SNPs	5	18120583	G	A	intron_variant	KITLG
SNPs	5	18120600	C	T	intron_variant	KITLG
SNPs	5	18120665	A	T	intron_variant	KITLG
SNPs	5	18120816	T	A	intron_variant	KITLG
SNPs	5	18120826	G	C	intron_variant	KITLG
SNPs	5	18120874	A	G	intron_variant	KITLG
SNPs	5	18121101	G	A,*	intron_variant	KITLG
SNPs	5	18121147	A	G	intron_variant	KITLG
SNPs	5	18121180	G	A	intron_variant	KITLG
SNPs	5	18121207	C	G	intron_variant	KITLG
SNPs	5	18121236	A	G	intron_variant	KITLG
SNPs	5	18121241	C	T	intron_variant	KITLG
SNPs	5	18121268	A	G	intron_variant	KITLG
SNPs	5	18121350	C	T	intron_variant	KITLG
SNPs	5	18121399	G	T	intron_variant	KITLG
SNPs	5	18121422	G	A	intron_variant	KITLG
SNPs	5	18121442	C	T	intron_variant	KITLG
SNPs	5	18121476	T	G	intron_variant	KITLG
SNPs	5	18121494	T	C	intron_variant	KITLG
SNPs	5	18121529	C	T	intron_variant	KITLG
SNPs	5	18121543	G	A	intron_variant	KITLG
SNPs	5	18121544	C	T	intron_variant	KITLG
SNPs	5	18121556	C	T	intron_variant	KITLG
SNPs	5	18121562	C	T	intron_variant	KITLG
SNPs	5	18121630	C	G,T	intron_variant	KITLG
SNPs	5	18121640	C	G	intron_variant	KITLG
SNPs	5	18121748	A	C	intron_variant	KITLG
SNPs	5	18121768	A	G	intron_variant	KITLG
SNPs	5	18121806	C	T	intron_variant	KITLG
SNPs	5	18121984	T	A	intron_variant	KITLG
SNPs	5	18122052	T	G	intron_variant	KITLG
SNPs	5	18122111	G	A	intron_variant	KITLG
SNPs	5	18122148	G	C	intron_variant	KITLG
SNPs	5	18122506	C	T	intron_variant	KITLG
SNPs	5	18122515	C	T	intron_variant	KITLG
SNPs	5	18122527	A	G	intron_variant	KITLG
SNPs	5	18122586	G	A	intron_variant	KITLG
SNPs	5	18122805	C	T	intron_variant	KITLG
SNPs	5	18122821	C	T	intron_variant	KITLG
SNPs	5	18122833	C	T	intron_variant	KITLG
SNPs	5	18122994	G	A	intron_variant	KITLG
SNPs	5	18123180	T	C	intron_variant	KITLG
SNPs	5	18123182	A	C	intron_variant	KITLG
SNPs	5	18123238	G	A	intron_variant	KITLG
SNPs	5	18123310	G	T	intron_variant	KITLG
SNPs	5	18123479	T	C	intron_variant	KITLG
SNPs	5	18123485	T	G	intron_variant	KITLG
SNPs	5	18123519	C	T	intron_variant	KITLG
SNPs	5	18123618	G	A	intron_variant	KITLG
SNPs	5	18123643	A	G	intron_variant	KITLG
SNPs	5	18123692	C	T	intron_variant	KITLG
SNPs	5	18123764	C	T	intron_variant	KITLG
SNPs	5	18123853	G	C	intron_variant	KITLG
SNPs	5	18123880	C	T	intron_variant	KITLG
SNPs	5	18124083	T	C	intron_variant	KITLG
SNPs	5	18124239	G	A	intron_variant	KITLG
SNPs	5	18124256	G	A	intron_variant	KITLG
SNPs	5	18124310	A	T	intron_variant	KITLG
SNPs	5	18124348	G	A	intron_variant	KITLG
SNPs	5	18124371	C	G	intron_variant	KITLG
SNPs	5	18124662	C	G	intron_variant	KITLG
SNPs	5	18124736	C	T	intron_variant	KITLG
SNPs	5	18124737	G	A	intron_variant	KITLG
SNPs	5	18124740	A	G	intron_variant	KITLG
SNPs	5	18124866	T	C	intron_variant	KITLG
SNPs	5	18124894	T	C	intron_variant	KITLG
SNPs	5	18125163	A	G	intron_variant	KITLG
SNPs	5	18125267	G	C	intron_variant	KITLG
SNPs	5	18125451	C	T	intron_variant	KITLG
SNPs	5	18125475	G	A	intron_variant	KITLG
SNPs	5	18125613	T	C	intron_variant	KITLG
SNPs	5	18125870	C	T	intron_variant	KITLG
SNPs	5	18125978	C	T	intron_variant	KITLG
SNPs	5	18126036	C	T	intron_variant	KITLG
SNPs	5	18126303	G	A	intron_variant	KITLG
SNPs	5	18126448	A	G	intron_variant	KITLG
SNPs	5	18126746	C	T	intron_variant	KITLG
SNPs	5	18126779	A	T	intron_variant	KITLG
SNPs	5	18126898	T	C	intron_variant	KITLG
SNPs	5	18127469	G	A	intron_variant	KITLG
SNPs	5	18127513	A	G	intron_variant	KITLG
SNPs	5	18127556	C	T	intron_variant	KITLG
SNPs	5	18127742	A	G	intron_variant	KITLG
SNPs	5	18127933	A	T	intron_variant	KITLG
SNPs	5	18128007	T	C	intron_variant	KITLG
SNPs	5	18128118	T	C	intron_variant	KITLG
SNPs	5	18128126	A	T	intron_variant	KITLG
SNPs	5	18128143	A	G	intron_variant	KITLG
SNPs	5	18128347	T	C	intron_variant	KITLG
SNPs	5	18128423	G	A	intron_variant	KITLG
SNPs	5	18128464	G	A	intron_variant	KITLG
SNPs	5	18128534	T	C	intron_variant	KITLG
SNPs	5	18128544	C	T	intron_variant	KITLG
SNPs	5	18128626	T	A	intron_variant	KITLG
SNPs	5	18128740	C	T	intron_variant	KITLG
SNPs	5	18128862	T	A	intron_variant	KITLG
SNPs	5	18129059	G	A	intron_variant	KITLG
SNPs	5	18129066	T	C	intron_variant	KITLG
SNPs	5	18129069	A	T	intron_variant	KITLG
SNPs	5	18129167	T	C	intron_variant	KITLG
SNPs	5	18129392	C	T	intron_variant	KITLG
SNPs	5	18129424	A	C	intron_variant	KITLG
SNPs	5	18129452	T	C	intron_variant	KITLG
SNPs	5	18129494	A	C	intron_variant	KITLG
SNPs	5	18129529	G	A	intron_variant	KITLG
SNPs	5	18129577	G	A	intron_variant	KITLG
SNPs	5	18129586	C	T	intron_variant	KITLG
SNPs	5	18129655	T	C	intron_variant	KITLG
SNPs	5	18129721	T	G	intron_variant	KITLG
SNPs	5	18129749	G	A	intron_variant	KITLG
SNPs	5	18129866	A	G	intron_variant	KITLG
SNPs	5	18129940	C	A	intron_variant	KITLG
SNPs	5	18130126	C	T	intron_variant	KITLG
SNPs	5	18130154	A	G	intron_variant	KITLG
SNPs	5	18130168	A	G	intron_variant	KITLG
SNPs	5	18130455	G	C	intron_variant	KITLG
SNPs	5	18130478	A	T	intron_variant	KITLG
SNPs	5	18130486	G	A	intron_variant	KITLG
SNPs	5	18130581	G	T	intron_variant	KITLG
SNPs	5	18130707	C	T	intron_variant	KITLG
SNPs	5	18130797	A	G	intron_variant	KITLG
SNPs	5	18130866	C	T	intron_variant	KITLG
SNPs	5	18131100	A	T	intron_variant	KITLG
SNPs	5	18131115	C	G	intron_variant	KITLG
SNPs	5	18131334	A	G	intron_variant	KITLG
SNPs	5	18131451	C	A	intron_variant	KITLG
SNPs	5	18131513	C	A	intron_variant	KITLG
SNPs	5	18131596	C	T	intron_variant	KITLG
SNPs	5	18131623	A	C	intron_variant	KITLG
SNPs	5	18131759	A	G	intron_variant	KITLG
SNPs	5	18131841	G	A	intron_variant	KITLG
SNPs	5	18132035	T	C	intron_variant	KITLG
SNPs	5	18132147	T	A	intron_variant	KITLG
SNPs	5	18132502	C	G	intron_variant	KITLG
SNPs	5	18132720	A	G	intron_variant	KITLG
SNPs	5	18132723	G	A	intron_variant	KITLG
SNPs	5	18133113	C	T	intron_variant	KITLG
SNPs	5	18133162	C	T	intron_variant	KITLG
SNPs	5	18133170	T	C	intron_variant	KITLG
SNPs	5	18133278	G	A	intron_variant	KITLG
SNPs	5	18133325	C	T	intron_variant	KITLG
SNPs	5	18133497	C	T	intron_variant	KITLG
SNPs	5	18133581	T	C	intron_variant	KITLG
SNPs	5	18133909	A	G	intron_variant	KITLG
SNPs	5	18133916	A	G	intron_variant	KITLG
SNPs	5	18134063	A	G	intron_variant	KITLG
SNPs	5	18134411	C	T	intron_variant	KITLG
SNPs	5	18134421	T	A	intron_variant	KITLG
SNPs	5	18134451	T	C	intron_variant	KITLG
SNPs	5	18134760	G	A	intron_variant	KITLG
SNPs	5	18134871	C	T	intron_variant	KITLG
SNPs	5	18134939	T	C	intron_variant	KITLG
SNPs	5	18135251	G	A,T	intron_variant	KITLG
SNPs	5	18135648	C	G	intron_variant	KITLG
SNPs	5	18135649	A	T	intron_variant	KITLG
SNPs	5	18135672	T	C	intron_variant	KITLG
SNPs	5	18135805	T	C	intron_variant	KITLG
SNPs	5	18136139	A	G	intron_variant	KITLG
SNPs	5	18136557	C	A	intron_variant	KITLG
SNPs	5	18136567	T	C	intron_variant	KITLG
SNPs	5	18136781	T	C	intron_variant	KITLG
SNPs	5	18136853	T	C	intron_variant	KITLG
SNPs	5	18136889	T	C	intron_variant	KITLG
SNPs	5	18136908	A	T	intron_variant	KITLG
SNPs	5	18137156	T	C	intron_variant	KITLG
SNPs	5	18137227	A	C	intron_variant	KITLG
SNPs	5	18137347	A	G	intron_variant	KITLG
SNPs	5	18137369	T	C	intron_variant	KITLG
SNPs	5	18137376	T	C	intron_variant	KITLG
SNPs	5	18137403	T	C	intron_variant	KITLG
SNPs	5	18137419	T	C	intron_variant	KITLG
SNPs	5	18137453	C	T	intron_variant	KITLG
SNPs	5	18137469	A	G	intron_variant	KITLG
SNPs	5	18137500	A	G	intron_variant	KITLG
SNPs	5	18137687	A	T	intron_variant	KITLG
SNPs	5	18137708	T	C	intron_variant	KITLG
SNPs	5	18137828	G	A	intron_variant	KITLG
SNPs	5	18137843	G	A	intron_variant	KITLG
SNPs	5	18137876	G	A	intron_variant	KITLG
SNPs	5	18137905	C	T	intron_variant	KITLG
SNPs	5	18137937	C	T	intron_variant	KITLG
SNPs	5	18137955	G	A	intron_variant	KITLG
SNPs	5	18137956	G	A	intron_variant	KITLG
SNPs	5	18137968	G	A	intron_variant	KITLG
SNPs	5	18137984	C	T	intron_variant	KITLG
SNPs	5	18138086	G	A	intron_variant	KITLG
SNPs	5	18138181	C	T	intron_variant	KITLG
SNPs	5	18138199	C	A	intron_variant	KITLG
SNPs	5	18138480	C	T	intron_variant	KITLG
SNPs	5	18138667	A	G	intron_variant	KITLG
SNPs	5	18138706	A	G	intron_variant	KITLG
SNPs	5	18139014	T	C	intron_variant	KITLG
SNPs	5	18139493	T	C	intron_variant	KITLG
SNPs	5	18139830	A	G	intron_variant	KITLG
SNPs	5	18139948	G	C	intron_variant	KITLG
SNPs	5	18139949	G	A	intron_variant	KITLG
SNPs	5	18140136	G	A	intron_variant	KITLG
SNPs	5	18140327	G	A	intron_variant	KITLG
SNPs	5	18140398	T	G	intron_variant	KITLG
SNPs	5	18140480	G	A	intron_variant	KITLG
SNPs	5	18140692	C	T	intron_variant	KITLG
SNPs	5	18141049	G	A	intron_variant	KITLG
SNPs	5	18141111	G	A	intron_variant	KITLG
SNPs	5	18141488	G	C	intron_variant	KITLG
SNPs	5	18141518	T	A	intron_variant	KITLG
SNPs	5	18141558	G	A	intron_variant	KITLG
SNPs	5	18141705	T	A	intron_variant	KITLG
SNPs	5	18141854	T	C	intron_variant	KITLG
SNPs	5	18142035	G	T	intron_variant	KITLG
SNPs	5	18142061	G	T	intron_variant	KITLG
SNPs	5	18142115	C	T	intron_variant	KITLG
SNPs	5	18142263	A	G	intron_variant	KITLG
SNPs	5	18142330	C	T	intron_variant	KITLG
SNPs	5	18142372	T	C	intron_variant	KITLG
SNPs	5	18142615	C	A	intron_variant	KITLG
SNPs	5	18142842	C	T	intron_variant	KITLG
SNPs	5	18142930	G	A	intron_variant	KITLG
SNPs	5	18143134	A	G	intron_variant	KITLG
SNPs	5	18143427	A	C	intron_variant	KITLG
SNPs	5	18143659	T	C	intron_variant	KITLG
SNPs	5	18143685	G	C	intron_variant	KITLG
SNPs	5	18143698	T	C	intron_variant	KITLG
SNPs	5	18143788	A	C	intron_variant	KITLG
SNPs	5	18143795	T	C	intron_variant	KITLG
SNPs	5	18143966	C	T	intron_variant	KITLG
SNPs	5	18144148	C	T	intron_variant	KITLG
SNPs	5	18144220	C	G	intron_variant	KITLG
SNPs	5	18144470	G	A	intron_variant	KITLG
SNPs	5	18144607	A	G	intron_variant	KITLG
SNPs	5	18145442	T	C	intron_variant	KITLG
SNPs	5	18145457	T	G	intron_variant	KITLG
SNPs	5	18145551	C	A	intron_variant	KITLG
SNPs	5	18145773	A	G	intron_variant	KITLG
SNPs	5	18145826	G	T	intron_variant	KITLG
SNPs	5	18146078	A	G	intron_variant	KITLG
SNPs	5	18146779	G	C	intron_variant	KITLG
SNPs	5	18146816	T	C	intron_variant	KITLG
SNPs	5	18146881	A	C	intron_variant	KITLG
SNPs	5	18147049	G	A	intron_variant	KITLG
SNPs	5	18147352	C	T	intron_variant	KITLG
SNPs	5	18147548	G	C	intron_variant	KITLG
SNPs	5	18147870	G	A	intron_variant	KITLG
SNPs	5	18147954	C	T	intron_variant	KITLG
SNPs	5	18148044	G	A	intron_variant	KITLG
SNPs	5	18148089	C	T	intron_variant	KITLG
SNPs	5	18148195	C	T	intron_variant	KITLG
SNPs	5	18148218	G	C	intron_variant	KITLG
SNPs	5	18148229	T	G	intron_variant	KITLG
SNPs	5	18148402	C	T	intron_variant	KITLG
SNPs	5	18148537	C	T	intron_variant	KITLG
SNPs	5	18148708	A	C	intron_variant	KITLG
SNPs	5	18148861	C	T	intron_variant	KITLG
SNPs	5	18148982	T	C	intron_variant	KITLG
SNPs	5	18149053	G	A	intron_variant	KITLG
SNPs	5	18149097	A	C	intron_variant	KITLG
SNPs	5	18149143	C	G	intron_variant	KITLG
SNPs	5	18149144	G	A	intron_variant	KITLG
SNPs	5	18149487	G	A	intron_variant	KITLG
SNPs	5	18149489	G	A	intron_variant	KITLG
SNPs	5	18149815	C	A	intron_variant	KITLG
SNPs	5	18149857	A	G	intron_variant	KITLG
SNPs	5	18149886	A	G	intron_variant	KITLG
SNPs	5	18149949	G	A	intron_variant	KITLG
SNPs	5	18149981	C	A	intron_variant	KITLG
SNPs	5	18150229	T	C	intron_variant	KITLG
SNPs	5	18151088	T	G	intron_variant	KITLG
SNPs	5	18151150	T	C	intron_variant	KITLG
SNPs	5	18151183	G	A	intron_variant	KITLG
SNPs	5	18151523	C	T	intron_variant	KITLG
SNPs	5	18151699	G	A	intron_variant	KITLG
SNPs	5	18151705	C	T	intron_variant	KITLG
SNPs	5	18152019	C	G	upstream_gene_variant	KITLG
SNPs	5	18152185	C	G	upstream_gene_variant	KITLG
SNPs	5	18152377	G	A	upstream_gene_variant	KITLG
SNPs	5	18152439	G	A	upstream_gene_variant	KITLG
SNPs	5	18152560	C	T	upstream_gene_variant	KITLG
SNPs	5	18152924	A	G	upstream_gene_variant	KITLG
SNPs	5	18153038	G	A	upstream_gene_variant	KITLG
SNPs	5	18153115	T	C	upstream_gene_variant	KITLG
SNPs	5	18153136	C	T	upstream_gene_variant	KITLG
SNPs	5	18153175	G	C	upstream_gene_variant	KITLG
SNPs	5	18153371	T	A	upstream_gene_variant	KITLG
SNPs	5	18153448	T	C	upstream_gene_variant	KITLG
SNPs	5	18153664	G	A	upstream_gene_variant	KITLG
SNPs	5	18153730	A	G	upstream_gene_variant	KITLG
SNPs	5	18153760	G	C	upstream_gene_variant	KITLG
SNPs	5	18153773	C	T	upstream_gene_variant	KITLG
SNPs	5	18153791	T	G	upstream_gene_variant	KITLG
SNPs	5	18153798	G	T	upstream_gene_variant	KITLG
SNPs	5	18153912	C	T	upstream_gene_variant	KITLG
SNPs	5	18153939	G	A	upstream_gene_variant	KITLG
SNPs	5	18154279	G	A	upstream_gene_variant	KITLG
SNPs	5	18154381	G	A	upstream_gene_variant	KITLG
SNPs	5	18154595	C	T	upstream_gene_variant	KITLG
SNPs	5	18154733	G	C	upstream_gene_variant	KITLG
SNPs	5	18154879	C	G	upstream_gene_variant	KITLG
SNPs	5	18154907	C	T	upstream_gene_variant	KITLG
SNPs	5	18155020	C	G	upstream_gene_variant	KITLG
SNPs	5	18155053	A	G	upstream_gene_variant	KITLG
SNPs	5	18155075	T	A	upstream_gene_variant	KITLG
SNPs	5	18155684	C	T	upstream_gene_variant	KITLG
SNPs	5	18155714	C	A	upstream_gene_variant	KITLG
SNPs	5	18155738	G	A	upstream_gene_variant	KITLG
SNPs	5	18155742	C	T	upstream_gene_variant	KITLG
SNPs	5	18155812	T	C	upstream_gene_variant	KITLG
SNPs	5	18155894	A	T	upstream_gene_variant	KITLG
SNPs	5	18156303	A	G	upstream_gene_variant	KITLG
SNPs	5	18156445	G	A	upstream_gene_variant	KITLG
SNPs	5	18156450	G	A	upstream_gene_variant	KITLG
SNPs	5	18156535	C	A	upstream_gene_variant	KITLG
SNPs	5	18156692	G	T	upstream_gene_variant	KITLG
SNPs	5	18156768	T	C	intergenic_region	KITLG-DUSP6
SNPs	5	18156813	G	A	intergenic_region	KITLG-DUSP6
SNPs	5	18156841	A	C	intergenic_region	KITLG-DUSP6
SNPs	5	18156851	G	C	intergenic_region	KITLG-DUSP6
SNPs	5	18157012	A	G	intergenic_region	KITLG-DUSP6
SNPs	5	18157068	A	T	intergenic_region	KITLG-DUSP6
SNPs	5	18157513	G	A	intergenic_region	KITLG-DUSP6
SNPs	5	18157540	A	G	intergenic_region	KITLG-DUSP6
SNPs	5	18157743	C	T	intergenic_region	KITLG-DUSP6
SNPs	5	18158029	C	T	intergenic_region	KITLG-DUSP6
SNPs	5	18158311	G	T	intergenic_region	KITLG-DUSP6
SNPs	5	18158487	G	A	intergenic_region	KITLG-DUSP6
SNPs	5	18158531	A	C	intergenic_region	KITLG-DUSP6
SNPs	5	18158565	G	T	intergenic_region	KITLG-DUSP6
SNPs	5	18158567	T	C	intergenic_region	KITLG-DUSP6
SNPs	5	18158628	T	A	intergenic_region	KITLG-DUSP6
SNPs	5	18158629	A	G	intergenic_region	KITLG-DUSP6
SNPs	5	18158636	C	T	intergenic_region	KITLG-DUSP6
SNPs	5	18158926	T	A	intergenic_region	KITLG-DUSP6
SNPs	5	18159157	G	A	intergenic_region	KITLG-DUSP6
SNPs	5	18159164	C	T	intergenic_region	KITLG-DUSP6
SNPs	5	18159601	C	T	intergenic_region	KITLG-DUSP6
SNPs	5	18159714	T	C	intergenic_region	KITLG-DUSP6
SNPs	5	18160073	C	G	intergenic_region	KITLG-DUSP6
SNPs	5	18160082	G	A	intergenic_region	KITLG-DUSP6
SNPs	5	18160089	C	G	intergenic_region	KITLG-DUSP6
SNPs	5	18160178	T	A	intergenic_region	KITLG-DUSP6
SNPs	5	18160257	T	C	intergenic_region	KITLG-DUSP6
SNPs	5	18160271	G	A	intergenic_region	KITLG-DUSP6
SNPs	5	18160329	A	G	intergenic_region	KITLG-DUSP6
SNPs	5	18160582	A	C	intergenic_region	KITLG-DUSP6
SNPs	5	18160761	C	T	intergenic_region	KITLG-DUSP6
SNPs	5	18160837	C	T	intergenic_region	KITLG-DUSP6
SNPs	5	18160903	G	A	intergenic_region	KITLG-DUSP6
SNPs	5	18160956	G	A	intergenic_region	KITLG-DUSP6
SNPs	5	18160995	G	A	intergenic_region	KITLG-DUSP6
SNPs	5	18161014	A	G	intergenic_region	KITLG-DUSP6
SNPs	5	18161019	A	G	intergenic_region	KITLG-DUSP6
SNPs	5	18161028	A	T	intergenic_region	KITLG-DUSP6
SNPs	5	18161057	C	A	intergenic_region	KITLG-DUSP6
SNPs	5	18161088	T	A	intergenic_region	KITLG-DUSP6
SNPs	5	18161216	G	T	intergenic_region	KITLG-DUSP6
SNPs	5	18161291	G	A	intergenic_region	KITLG-DUSP6
SNPs	5	18161380	A	G	intergenic_region	KITLG-DUSP6
SNPs	5	18161404	A	C	intergenic_region	KITLG-DUSP6
SNPs	5	18161476	A	G	intergenic_region	KITLG-DUSP6
SNPs	5	18161507	T	A	intergenic_region	KITLG-DUSP6
SNPs	5	18161719	T	C	intergenic_region	KITLG-DUSP6
SNPs	5	18161789	T	C	intergenic_region	KITLG-DUSP6
SNPs	5	18161794	A	G	intergenic_region	KITLG-DUSP6
SNPs	5	18162143	G	C	intergenic_region	KITLG-DUSP6
SNPs	5	18162562	T	C	intergenic_region	KITLG-DUSP6
SNPs	5	18162576	T	C	intergenic_region	KITLG-DUSP6
SNPs	5	18162712	T	C	intergenic_region	KITLG-DUSP6
SNPs	5	18162829	T	G	intergenic_region	KITLG-DUSP6
SNPs	5	18162830	G	A	intergenic_region	KITLG-DUSP6
SNPs	5	18162900	T	C	intergenic_region	KITLG-DUSP6
SNPs	5	18162981	G	A	intergenic_region	KITLG-DUSP6
SNPs	5	18163606	C	T	intergenic_region	KITLG-DUSP6
SNPs	5	18163928	G	A	intergenic_region	KITLG-DUSP6
SNPs	5	18164034	A	G	intergenic_region	KITLG-DUSP6
SNPs	5	18164038	G	A	intergenic_region	KITLG-DUSP6
SNPs	5	18164041	G	A	intergenic_region	KITLG-DUSP6
SNPs	5	18164076	T	C	intergenic_region	KITLG-DUSP6
SNPs	5	18164077	G	A	intergenic_region	KITLG-DUSP6
SNPs	5	18164086	A	G	intergenic_region	KITLG-DUSP6
SNPs	5	18164088	T	G	intergenic_region	KITLG-DUSP6
SNPs	5	18164149	G	C	intergenic_region	KITLG-DUSP6
SNPs	5	18164245	A	G	intergenic_region	KITLG-DUSP6
SNPs	5	18164410	G	A	intergenic_region	KITLG-DUSP6
SNPs	5	18164426	T	C	intergenic_region	KITLG-DUSP6
SNPs	5	18164440	T	C	intergenic_region	KITLG-DUSP6
SNPs	5	18164497	C	G	intergenic_region	KITLG-DUSP6
SNPs	5	18164534	G	A	intergenic_region	KITLG-DUSP6
SNPs	5	18164571	A	G	intergenic_region	KITLG-DUSP6
SNPs	5	18164576	C	T	intergenic_region	KITLG-DUSP6
SNPs	5	18164578	C	T	intergenic_region	KITLG-DUSP6
SNPs	5	18164945	C	T	intergenic_region	KITLG-DUSP6
SNPs	5	18164949	G	A	intergenic_region	KITLG-DUSP6
SNPs	5	18165106	G	A	intergenic_region	KITLG-DUSP6
SNPs	5	18165288	A	G	intergenic_region	KITLG-DUSP6
SNPs	5	18165484	A	C,G	intergenic_region	KITLG-DUSP6
SNPs	5	18165571	C	T	intergenic_region	KITLG-DUSP6
SNPs	5	18165681	T	C	intergenic_region	KITLG-DUSP6
SNPs	5	18165832	A	C	intergenic_region	KITLG-DUSP6
SNPs	5	18165842	C	T	intergenic_region	KITLG-DUSP6
SNPs	5	18165918	C	G	intergenic_region	KITLG-DUSP6
SNPs	5	18165925	G	A	intergenic_region	KITLG-DUSP6
SNPs	5	18166000	G	T	intergenic_region	KITLG-DUSP6
SNPs	5	18166035	A	G	intergenic_region	KITLG-DUSP6
SNPs	5	18166039	A	T	intergenic_region	KITLG-DUSP6
SNPs	5	18166078	G	A	intergenic_region	KITLG-DUSP6
SNPs	5	18166098	G	A	intergenic_region	KITLG-DUSP6
SNPs	5	18166111	T	G	intergenic_region	KITLG-DUSP6
SNPs	5	18166178	T	G	intergenic_region	KITLG-DUSP6
SNPs	5	18166311	C	T	intergenic_region	KITLG-DUSP6
SNPs	5	18166349	A	C	intergenic_region	KITLG-DUSP6
SNPs	5	18166400	G	A	intergenic_region	KITLG-DUSP6
SNPs	5	18166490	T	C	intergenic_region	KITLG-DUSP6
SNPs	5	18166509	A	T	intergenic_region	KITLG-DUSP6
SNPs	5	18166552	G	T	intergenic_region	KITLG-DUSP6
SNPs	5	18166598	G	A	intergenic_region	KITLG-DUSP6
SNPs	5	18166610	G	A	intergenic_region	KITLG-DUSP6
SNPs	5	18166620	G	A	intergenic_region	KITLG-DUSP6
SNPs	5	18166646	T	C	intergenic_region	KITLG-DUSP6
SNPs	5	18166669	G	A	intergenic_region	KITLG-DUSP6
SNPs	5	18166706	G	A	intergenic_region	KITLG-DUSP6
SNPs	5	18166780	G	A	intergenic_region	KITLG-DUSP6
SNPs	5	18166852	T	C	intergenic_region	KITLG-DUSP6
SNPs	5	18166873	G	A	intergenic_region	KITLG-DUSP6
SNPs	5	18166886	A	G	intergenic_region	KITLG-DUSP6
SNPs	5	18166969	G	A	intergenic_region	KITLG-DUSP6
SNPs	5	18166997	T	G	intergenic_region	KITLG-DUSP6
SNPs	5	18167002	C	T	intergenic_region	KITLG-DUSP6
SNPs	5	18167072	A	G	intergenic_region	KITLG-DUSP6
SNPs	5	18167082	C	T	intergenic_region	KITLG-DUSP6
SNPs	5	18167134	G	A	intergenic_region	KITLG-DUSP6
SNPs	5	18167183	C	A	intergenic_region	KITLG-DUSP6
SNPs	5	18167221	C	T	intergenic_region	KITLG-DUSP6
SNPs	5	18167241	C	G	intergenic_region	KITLG-DUSP6
SNPs	5	18167261	G	A	intergenic_region	KITLG-DUSP6
SNPs	5	18167264	A	G	intergenic_region	KITLG-DUSP6
SNPs	5	18167286	G	A	intergenic_region	KITLG-DUSP6
SNPs	5	18167366	T	C	intergenic_region	KITLG-DUSP6
SNPs	5	18167367	G	T	intergenic_region	KITLG-DUSP6
SNPs	5	18167389	G	A	intergenic_region	KITLG-DUSP6
SNPs	5	18167416	T	C	intergenic_region	KITLG-DUSP6
SNPs	5	18167747	A	G	intergenic_region	KITLG-DUSP6
SNPs	5	18167782	A	G	intergenic_region	KITLG-DUSP6
SNPs	5	18167784	A	T	intergenic_region	KITLG-DUSP6
SNPs	5	18167788	C	T	intergenic_region	KITLG-DUSP6
SNPs	5	18167808	A	G	intergenic_region	KITLG-DUSP6
SNPs	5	18167809	T	C	intergenic_region	KITLG-DUSP6
SNPs	5	18168013	C	T	intergenic_region	KITLG-DUSP6
SNPs	5	18168042	A	G	intergenic_region	KITLG-DUSP6
SNPs	5	18168043	C	T	intergenic_region	KITLG-DUSP6
SNPs	5	18168097	C	T	intergenic_region	KITLG-DUSP6
SNPs	5	18168125	T	G	intergenic_region	KITLG-DUSP6
SNPs	5	18168157	T	A	intergenic_region	KITLG-DUSP6
SNPs	5	18168280	C	T	intergenic_region	KITLG-DUSP6
SNPs	5	18168293	A	G	intergenic_region	KITLG-DUSP6
SNPs	5	18168356	G	A	intergenic_region	KITLG-DUSP6
SNPs	5	18168372	A	T	intergenic_region	KITLG-DUSP6
SNPs	5	18168393	T	C	intergenic_region	KITLG-DUSP6
SNPs	5	18168456	G	A	intergenic_region	KITLG-DUSP6
SNPs	5	18168488	T	G	intergenic_region	KITLG-DUSP6
SNPs	5	18168509	T	C	intergenic_region	KITLG-DUSP6
SNPs	5	18168533	T	C	intergenic_region	KITLG-DUSP6
SNPs	5	18168552	G	C	intergenic_region	KITLG-DUSP6
SNPs	5	18168592	T	C	intergenic_region	KITLG-DUSP6
SNPs	5	18168623	T	C	intergenic_region	KITLG-DUSP6
SNPs	5	18168643	C	T	intergenic_region	KITLG-DUSP6
SNPs	5	18168729	A	G	intergenic_region	KITLG-DUSP6
SNPs	5	18168731	A	G	intergenic_region	KITLG-DUSP6
SNPs	5	18168771	C	G	intergenic_region	KITLG-DUSP6
SNPs	5	18168775	T	A	intergenic_region	KITLG-DUSP6
SNPs	5	18168869	C	T	intergenic_region	KITLG-DUSP6
SNPs	5	18168898	T	G	intergenic_region	KITLG-DUSP6
SNPs	5	18168972	A	G	intergenic_region	KITLG-DUSP6
SNPs	5	18169101	T	C	intergenic_region	KITLG-DUSP6
SNPs	5	18169102	T	A	intergenic_region	KITLG-DUSP6
SNPs	5	18169123	T	A	intergenic_region	KITLG-DUSP6
SNPs	5	18169218	C	T	intergenic_region	KITLG-DUSP6
SNPs	5	18169437	C	T	intergenic_region	KITLG-DUSP6
SNPs	5	18169441	T	G	intergenic_region	KITLG-DUSP6
SNPs	5	18169613	G	A	intergenic_region	KITLG-DUSP6
SNPs	5	18169681	T	C	intergenic_region	KITLG-DUSP6
SNPs	5	18169692	T	C	intergenic_region	KITLG-DUSP6
SNPs	5	18169749	C	A	intergenic_region	KITLG-DUSP6
SNPs	5	18169756	A	G	intergenic_region	KITLG-DUSP6
SNPs	5	18169870	C	G	intergenic_region	KITLG-DUSP6
SNPs	5	18169981	T	C	intergenic_region	KITLG-DUSP6
SNPs	5	18170069	T	G	intergenic_region	KITLG-DUSP6
SNPs	5	18170224	C	T	intergenic_region	KITLG-DUSP6
SNPs	5	18170310	C	A	intergenic_region	KITLG-DUSP6
SNPs	5	18170322	A	C	intergenic_region	KITLG-DUSP6
SNPs	5	18170358	T	C	intergenic_region	KITLG-DUSP6
SNPs	5	18170410	T	C	intergenic_region	KITLG-DUSP6
SNPs	5	18170426	C	T	intergenic_region	KITLG-DUSP6
SNPs	5	18170495	C	T	intergenic_region	KITLG-DUSP6
SNPs	5	18170541	C	T	intergenic_region	KITLG-DUSP6
SNPs	5	18170569	G	T	intergenic_region	KITLG-DUSP6
SNPs	5	18170587	T	C	intergenic_region	KITLG-DUSP6
SNPs	5	18170623	G	A	intergenic_region	KITLG-DUSP6
SNPs	5	18170710	G	T	intergenic_region	KITLG-DUSP6
SNPs	5	18170711	G	C	intergenic_region	KITLG-DUSP6
SNPs	5	18170718	G	A	intergenic_region	KITLG-DUSP6
SNPs	5	18170742	C	T	intergenic_region	KITLG-DUSP6
SNPs	5	18170801	G	T	intergenic_region	KITLG-DUSP6
SNPs	5	18170802	G	C	intergenic_region	KITLG-DUSP6
SNPs	5	18170803	G	T	intergenic_region	KITLG-DUSP6
SNPs	5	18170850	T	C	intergenic_region	KITLG-DUSP6
SNPs	5	18170860	C	T	intergenic_region	KITLG-DUSP6
SNPs	5	18170942	T	A	intergenic_region	KITLG-DUSP6
SNPs	5	18171092	G	A	intergenic_region	KITLG-DUSP6
SNPs	5	18171168	G	A	intergenic_region	KITLG-DUSP6
SNPs	5	18171320	T	C	intergenic_region	KITLG-DUSP6
SNPs	5	18171336	C	T	intergenic_region	KITLG-DUSP6
SNPs	5	18171381	C	G	intergenic_region	KITLG-DUSP6
SNPs	5	18171393	T	G	intergenic_region	KITLG-DUSP6
SNPs	5	18171477	A	G	intergenic_region	KITLG-DUSP6
SNPs	5	18171506	A	T	intergenic_region	KITLG-DUSP6
SNPs	5	18171521	A	G	intergenic_region	KITLG-DUSP6
SNPs	5	18171662	G	A	intergenic_region	KITLG-DUSP6
SNPs	5	18171705	T	C	intergenic_region	KITLG-DUSP6
SNPs	5	18171856	G	A	intergenic_region	KITLG-DUSP6
SNPs	5	18171884	G	A	intergenic_region	KITLG-DUSP6
SNPs	5	18171916	A	G	intergenic_region	KITLG-DUSP6
SNPs	5	18172031	G	A	intergenic_region	KITLG-DUSP6
SNPs	5	18172032	G	A	intergenic_region	KITLG-DUSP6
SNPs	5	18172142	C	A	intergenic_region	KITLG-DUSP6
SNPs	5	18172153	G	A	intergenic_region	KITLG-DUSP6
SNPs	5	18172171	A	G	intergenic_region	KITLG-DUSP6
SNPs	5	18172175	A	C	intergenic_region	KITLG-DUSP6
SNPs	5	18172190	C	T	intergenic_region	KITLG-DUSP6
SNPs	5	18172247	G	A	intergenic_region	KITLG-DUSP6
SNPs	5	18172309	C	T	intergenic_region	KITLG-DUSP6
SNPs	5	18172318	A	G	intergenic_region	KITLG-DUSP6
SNPs	5	18172321	A	G	intergenic_region	KITLG-DUSP6
SNPs	5	18172354	G	T	intergenic_region	KITLG-DUSP6
SNPs	5	18172403	G	A	intergenic_region	KITLG-DUSP6
SNPs	5	18172467	T	G	intergenic_region	KITLG-DUSP6
SNPs	5	18172546	T	C	intergenic_region	KITLG-DUSP6
SNPs	5	18172574	G	C	intergenic_region	KITLG-DUSP6
SNPs	5	18172853	A	G	intergenic_region	KITLG-DUSP6
SNPs	5	18172898	G	A	intergenic_region	KITLG-DUSP6
SNPs	5	18172981	G	T	intergenic_region	KITLG-DUSP6
SNPs	5	18172986	A	G	intergenic_region	KITLG-DUSP6
SNPs	5	18173072	G	A	intergenic_region	KITLG-DUSP6
SNPs	5	18173082	A	C,G	intergenic_region	KITLG-DUSP6
SNPs	5	18173127	G	T	intergenic_region	KITLG-DUSP6
SNPs	5	18173239	G	C	intergenic_region	KITLG-DUSP6
SNPs	5	18173259	T	C	intergenic_region	KITLG-DUSP6
SNPs	5	18173377	G	A	intergenic_region	KITLG-DUSP6
SNPs	5	18173392	T	C	intergenic_region	KITLG-DUSP6
SNPs	5	18173416	A	G	intergenic_region	KITLG-DUSP6
SNPs	5	18173442	T	G	intergenic_region	KITLG-DUSP6
SNPs	5	18173454	A	G	intergenic_region	KITLG-DUSP6
SNPs	5	18173518	T	A	intergenic_region	KITLG-DUSP6
SNPs	5	18173571	A	G	intergenic_region	KITLG-DUSP6
SNPs	5	18173589	G	C	intergenic_region	KITLG-DUSP6
SNPs	5	18173590	G	A	intergenic_region	KITLG-DUSP6
SNPs	5	18173620	G	C	intergenic_region	KITLG-DUSP6
SNPs	5	18173701	T	C	intergenic_region	KITLG-DUSP6
SNPs	5	18173726	G	A	intergenic_region	KITLG-DUSP6
SNPs	5	18173893	T	A	intergenic_region	KITLG-DUSP6
SNPs	5	18173914	C	T	intergenic_region	KITLG-DUSP6
SNPs	5	18174066	C	T	intergenic_region	KITLG-DUSP6
SNPs	5	18174134	A	G	intergenic_region	KITLG-DUSP6
SNPs	5	18174145	G	T	intergenic_region	KITLG-DUSP6
SNPs	5	18174243	C	G	intergenic_region	KITLG-DUSP6
SNPs	5	18174246	T	C	intergenic_region	KITLG-DUSP6
SNPs	5	18174571	G	A	intergenic_region	KITLG-DUSP6
SNPs	5	18174587	A	G	intergenic_region	KITLG-DUSP6
SNPs	5	18174592	C	T	intergenic_region	KITLG-DUSP6
SNPs	5	18174595	A	C	intergenic_region	KITLG-DUSP6
SNPs	5	18174626	G	T	intergenic_region	KITLG-DUSP6
SNPs	5	18174677	G	A	intergenic_region	KITLG-DUSP6
SNPs	5	18174784	C	G	intergenic_region	KITLG-DUSP6
SNPs	5	18174815	A	G	intergenic_region	KITLG-DUSP6
SNPs	5	18174859	A	G	intergenic_region	KITLG-DUSP6
SNPs	5	18174905	G	C	intergenic_region	KITLG-DUSP6
SNPs	5	18174936	A	G	intergenic_region	KITLG-DUSP6
SNPs	5	18174941	T	C	intergenic_region	KITLG-DUSP6
SNPs	5	18174965	T	A	intergenic_region	KITLG-DUSP6
SNPs	5	18175041	G	C	intergenic_region	KITLG-DUSP6
SNPs	5	18175154	A	G	intergenic_region	KITLG-DUSP6
SNPs	5	18175168	T	C	intergenic_region	KITLG-DUSP6
SNPs	5	18175197	G	A	intergenic_region	KITLG-DUSP6
SNPs	5	18175234	A	T	intergenic_region	KITLG-DUSP6
SNPs	5	18175283	C	T	intergenic_region	KITLG-DUSP6
SNPs	5	18175356	C	A	intergenic_region	KITLG-DUSP6
SNPs	5	18175368	G	A	intergenic_region	KITLG-DUSP6
SNPs	5	18175527	A	C	intergenic_region	KITLG-DUSP6
SNPs	5	18175574	G	A	intergenic_region	KITLG-DUSP6
SNPs	5	18175628	C	T	intergenic_region	KITLG-DUSP6
SNPs	5	18175897	G	T	intergenic_region	KITLG-DUSP6
SNPs	5	18175919	C	T	intergenic_region	KITLG-DUSP6
SNPs	5	18175968	A	G	intergenic_region	KITLG-DUSP6
SNPs	5	18176034	G	A	intergenic_region	KITLG-DUSP6
SNPs	5	18176056	C	T	intergenic_region	KITLG-DUSP6
SNPs	5	18176086	A	G	intergenic_region	KITLG-DUSP6
SNPs	5	18176157	C	T	intergenic_region	KITLG-DUSP6
SNPs	5	18176174	G	A	intergenic_region	KITLG-DUSP6
SNPs	5	18176176	C	T	intergenic_region	KITLG-DUSP6
SNPs	5	18176215	G	A	intergenic_region	KITLG-DUSP6
SNPs	5	18176253	A	G	intergenic_region	KITLG-DUSP6
SNPs	5	18176285	G	A	intergenic_region	KITLG-DUSP6
SNPs	5	18176380	A	G	intergenic_region	KITLG-DUSP6
SNPs	5	18176391	A	C	intergenic_region	KITLG-DUSP6
SNPs	5	18176438	G	A	intergenic_region	KITLG-DUSP6
SNPs	5	18176440	C	A	intergenic_region	KITLG-DUSP6
SNPs	5	18176441	A	G	intergenic_region	KITLG-DUSP6
SNPs	5	18176444	A	G	intergenic_region	KITLG-DUSP6
SNPs	5	18176544	G	A	intergenic_region	KITLG-DUSP6
SNPs	5	18176629	T	G	intergenic_region	KITLG-DUSP6
SNPs	5	18176633	C	T	intergenic_region	KITLG-DUSP6
SNPs	5	18176700	T	G,A	intergenic_region	KITLG-DUSP6
SNPs	5	18176727	A	C	intergenic_region	KITLG-DUSP6
SNPs	5	18176759	G	A	intergenic_region	KITLG-DUSP6
SNPs	5	18176767	G	T	intergenic_region	KITLG-DUSP6
SNPs	5	18176797	T	C	intergenic_region	KITLG-DUSP6
SNPs	5	18176921	C	T	intergenic_region	KITLG-DUSP6
SNPs	5	18177128	G	T	intergenic_region	KITLG-DUSP6
SNPs	5	18177142	A	T	intergenic_region	KITLG-DUSP6
SNPs	5	18177170	G	A	intergenic_region	KITLG-DUSP6
SNPs	5	18177180	A	T	intergenic_region	KITLG-DUSP6
SNPs	5	18177217	T	G	intergenic_region	KITLG-DUSP6
SNPs	5	18177286	C	T	intergenic_region	KITLG-DUSP6
SNPs	5	18177367	T	G	intergenic_region	KITLG-DUSP6
SNPs	5	18177619	T	A	intergenic_region	KITLG-DUSP6
SNPs	5	18177627	G	A	intergenic_region	KITLG-DUSP6
SNPs	5	18177705	C	T	intergenic_region	KITLG-DUSP6
SNPs	5	18177776	T	C	intergenic_region	KITLG-DUSP6
SNPs	5	18177825	C	T	intergenic_region	KITLG-DUSP6
SNPs	5	18177910	T	A	intergenic_region	KITLG-DUSP6
SNPs	5	18177964	G	T	intergenic_region	KITLG-DUSP6
SNPs	5	18177999	G	A	intergenic_region	KITLG-DUSP6
SNPs	5	18178027	A	G	intergenic_region	KITLG-DUSP6
SNPs	5	18178126	T	A	intergenic_region	KITLG-DUSP6
SNPs	5	18178237	G	A	intergenic_region	KITLG-DUSP6
SNPs	5	18178249	A	C	intergenic_region	KITLG-DUSP6
SNPs	5	18178257	T	C	intergenic_region	KITLG-DUSP6
SNPs	5	18178310	C	T	intergenic_region	KITLG-DUSP6
SNPs	5	18178331	G	A	intergenic_region	KITLG-DUSP6
SNPs	5	18178336	C	T	intergenic_region	KITLG-DUSP6
SNPs	5	18178402	A	G	intergenic_region	KITLG-DUSP6
SNPs	5	18178453	T	G	intergenic_region	KITLG-DUSP6
SNPs	5	18178530	G	A	intergenic_region	KITLG-DUSP6
SNPs	5	18178561	C	T	intergenic_region	KITLG-DUSP6
SNPs	5	18178616	C	T	intergenic_region	KITLG-DUSP6
SNPs	5	18178624	A	C	intergenic_region	KITLG-DUSP6
SNPs	5	18178715	A	T	intergenic_region	KITLG-DUSP6
SNPs	5	18178728	C	A	intergenic_region	KITLG-DUSP6
SNPs	5	18178888	T	C	intergenic_region	KITLG-DUSP6
SNPs	5	18178889	C	T	intergenic_region	KITLG-DUSP6
SNPs	5	18178899	A	G	intergenic_region	KITLG-DUSP6
SNPs	5	18178901	A	G	intergenic_region	KITLG-DUSP6
SNPs	5	18178975	T	C	intergenic_region	KITLG-DUSP6
SNPs	5	18178999	C	T	intergenic_region	KITLG-DUSP6
SNPs	5	18179016	A	G	intergenic_region	KITLG-DUSP6
SNPs	5	18179139	G	A	intergenic_region	KITLG-DUSP6
SNPs	5	18179212	T	C	intergenic_region	KITLG-DUSP6
SNPs	5	18179256	T	A	intergenic_region	KITLG-DUSP6
SNPs	5	18179300	C	G	intergenic_region	KITLG-DUSP6
SNPs	5	18179356	C	T	intergenic_region	KITLG-DUSP6
SNPs	5	18179466	C	T	intergenic_region	KITLG-DUSP6
SNPs	5	18179468	T	C	intergenic_region	KITLG-DUSP6
SNPs	5	18179523	T	C	intergenic_region	KITLG-DUSP6
SNPs	5	18179535	T	A	intergenic_region	KITLG-DUSP6
SNPs	5	18179537	G	A	intergenic_region	KITLG-DUSP6
SNPs	5	18179561	G	A	intergenic_region	KITLG-DUSP6
SNPs	5	18179567	C	T	intergenic_region	KITLG-DUSP6
SNPs	5	18179570	C	T	intergenic_region	KITLG-DUSP6
SNPs	5	18179649	G	A	intergenic_region	KITLG-DUSP6
SNPs	5	18179687	G	A	intergenic_region	KITLG-DUSP6
SNPs	5	18179691	C	T	intergenic_region	KITLG-DUSP6
SNPs	5	18179740	A	T	intergenic_region	KITLG-DUSP6
SNPs	5	18179778	T	C	intergenic_region	KITLG-DUSP6
SNPs	5	18179781	C	T	intergenic_region	KITLG-DUSP6
SNPs	5	18179865	C	T	intergenic_region	KITLG-DUSP6
SNPs	5	18179913	A	G	intergenic_region	KITLG-DUSP6
SNPs	5	18179924	A	G	intergenic_region	KITLG-DUSP6
Indels	5	18021400	CAG	C	intron_variant	KITLG
Indels	5	18022588	T	TATA	intron_variant	KITLG
Indels	5	18023081	CT	C	intron_variant	KITLG
Indels	5	18024361	C	CG	intron_variant	KITLG
Indels	5	18024746	G	GT	intron_variant	KITLG
Indels	5	18025296	A	ACTG	intron_variant	KITLG
Indels	5	18026887	A	ATCTTAGTTTT	intron_variant	KITLG
Indels	5	18026888	GGGC	G	intron_variant	KITLG
Indels	5	18026892	C	CAT	intron_variant	KITLG
Indels	5	18028579	TTTCACA	T	intron_variant	KITLG
Indels	5	18029790	G	GA	intron_variant	KITLG
Indels	5	18030509	G	GT	intron_variant	KITLG
Indels	5	18030912	GAC	G	intron_variant	KITLG
Indels	5	18031980	GA	G	intron_variant	KITLG
Indels	5	18032528	CAA	C	intron_variant	KITLG
Indels	5	18035193	TA	T	intron_variant	KITLG
Indels	5	18036834	ATTT	A	intron_variant	KITLG
Indels	5	18037046	GATGGTTTTCCCTATTTTTTTCC	G	intron_variant	KITLG
Indels	5	18037667	GTA	G	intron_variant	KITLG
Indels	5	18038851	TA	T	intron_variant	KITLG
Indels	5	18040473	TTC	T	downstream_gene_variant	KITLG
Indels	5	18042289	CCA	C	downstream_gene_variant	KITLG
Indels	5	18042292	T	TGA	downstream_gene_variant	KITLG
Indels	5	18043331	TCTC	T	downstream_gene_variant	KITLG
Indels	5	18043847	ATTTCT	A	downstream_gene_variant	KITLG
Indels	5	18044784	CT	C	3_prime_UTR_variant	KITLG
Indels	5	18045121	TG	T	3_prime_UTR_variant	KITLG
Indels	5	18046724	CA	C	3_prime_UTR_variant	KITLG
Indels	5	18047655	TA	T	3_prime_UTR_variant	KITLG
Indels	5	18048878	T	TAG	3_prime_UTR_variant	KITLG
Indels	5	18049205	G	GT	intron_variant	KITLG
Indels	5	18049944	G	GCCC	intron_variant	KITLG
Indels	5	18050507	CT	C	intron_variant	KITLG
Indels	5	18050804	AT	A	intron_variant	KITLG
Indels	5	18051543	AT	ATT	intron_variant	KITLG
Indels	5	18051593	GAGAAACAAGAA	G	intron_variant	KITLG
Indels	5	18052502	CAGG	C	intron_variant	KITLG
Indels	5	18054829	CA	C	intron_variant	KITLG
Indels	5	18056081	CAG	C	intron_variant	KITLG
Indels	5	18056351	TAA	T	intron_variant	KITLG
Indels	5	18056378	T	TA	intron_variant	KITLG
Indels	5	18056425	TA	T	intron_variant	KITLG
Indels	5	18056767	A	ACAAACCACAGAGGACAGGCCATCCGAAAG	intron_variant	KITLG
Indels	5	18057065	G	GA	intron_variant	KITLG
Indels	5	18059363	GC	G	intron_variant	KITLG
Indels	5	18059483	AAG	A	intron_variant	KITLG
Indels	5	18064480	A	AAAG	intron_variant	KITLG
Indels	5	18065208	CTGCCT	C	intron_variant	KITLG
Indels	5	18065214	A	AT	intron_variant	KITLG
Indels	5	18068223	A	AT	intron_variant	KITLG
Indels	5	18069247	CAT	C	intron_variant	KITLG
Indels	5	18069907	CGGATAAAA	C	intron_variant	KITLG
Indels	5	18070683	AAAAAAC	A	intron_variant	KITLG
Indels	5	18071054	A	AGAG	intron_variant	KITLG
Indels	5	18074687	TCTTA	T	intron_variant	KITLG
Indels	5	18075388	G	GA	intron_variant	KITLG
Indels	5	18075820	CTT	C	intron_variant	KITLG
Indels	5	18076877	C	CT	intron_variant	KITLG
Indels	5	18077219	C	CT	intron_variant	KITLG
Indels	5	18077427	T	TAAATGAAAGACTAATAATAATAATAA	intron_variant	KITLG
Indels	5	18077429	TTCTTC	T	intron_variant	KITLG
Indels	5	18077441	C	CTATA	intron_variant	KITLG
Indels	5	18078382	GA	G	intron_variant	KITLG
Indels	5	18080536	T	TG	intron_variant	KITLG
Indels	5	18080549	G	GA	intron_variant	KITLG
Indels	5	18081620	GGC	G	intron_variant	KITLG
Indels	5	18082176	T	TAA	intron_variant	KITLG
Indels	5	18082602	T	TA	intron_variant	KITLG
Indels	5	18083442	GT	G	intron_variant	KITLG
Indels	5	18083593	AGT	A	intron_variant	KITLG
Indels	5	18084566	G	GGAAAA	intron_variant	KITLG
Indels	5	18084964	A	AAAG	intron_variant	KITLG
Indels	5	18088878	A	AG	intron_variant	KITLG
Indels	5	18089028	TAA	TA	intron_variant	KITLG
Indels	5	18089362	A	AG	intron_variant	KITLG
Indels	5	18090989	CTGT	C	intron_variant	KITLG
Indels	5	18092408	TAGTAAAGA	T	intron_variant	KITLG
Indels	5	18094112	AT	A	intron_variant	KITLG
Indels	5	18094878	A	AAG	intron_variant	KITLG
Indels	5	18094930	AG	A	intron_variant	KITLG
Indels	5	18094936	GAC	G	intron_variant	KITLG
Indels	5	18095584	GT	G	intron_variant	KITLG
Indels	5	18096259	TAA	TA	intron_variant	KITLG
Indels	5	18099447	CA	C	intron_variant	KITLG
Indels	5	18103570	GC	G	intron_variant	KITLG
Indels	5	18103749	CG	C	intron_variant	KITLG
Indels	5	18104261	GAA	G	intron_variant	KITLG
Indels	5	18104725	GA	G	intron_variant	KITLG
Indels	5	18104959	TGAAGAGAA	T	intron_variant	KITLG
Indels	5	18104967	A	ATT	intron_variant	KITLG
Indels	5	18107021	TG	T	intron_variant	KITLG
Indels	5	18107695	AT	A	intron_variant	KITLG
Indels	5	18107889	G	GCA	intron_variant	KITLG
Indels	5	18108086	T	TA	intron_variant	KITLG
Indels	5	18108641	T	TGA	intron_variant	KITLG
Indels	5	18110520	TTGC	T	intron_variant	KITLG
Indels	5	18113043	CT	C	intron_variant	KITLG
Indels	5	18113615	GA	GAA	intron_variant	KITLG
Indels	5	18113800	T	TA	intron_variant	KITLG
Indels	5	18115719	G	GC	intron_variant	KITLG
Indels	5	18115720	A	AT	intron_variant	KITLG
Indels	5	18115765	CTATGGA	C	intron_variant	KITLG
Indels	5	18115772	CT	C	intron_variant	KITLG
Indels	5	18115778	C	CCCA	intron_variant	KITLG
Indels	5	18116598	C	CATCA	intron_variant	KITLG
Indels	5	18117646	AC	A	intron_variant	KITLG
Indels	5	18118429	T	TA	intron_variant	KITLG
Indels	5	18121098	CAGG	C	intron_variant	KITLG
Indels	5	18123123	AT	A	intron_variant	KITLG
Indels	5	18124099	AGTC	A	intron_variant	KITLG
Indels	5	18125166	TG	T	intron_variant	KITLG
Indels	5	18125669	CTG	C	intron_variant	KITLG
Indels	5	18126931	CACA	C	intron_variant	KITLG
Indels	5	18127507	G	GAA	intron_variant	KITLG
Indels	5	18128507	GT	G	intron_variant	KITLG
Indels	5	18129215	C	CAAT	intron_variant	KITLG
Indels	5	18129627	G	GTGTAGAGGAGAC	intron_variant	KITLG
Indels	5	18130653	CA	C	intron_variant	KITLG
Indels	5	18131605	T	TAGTA	intron_variant	KITLG
Indels	5	18145840	AGACTAAG	A	intron_variant	KITLG
Indels	5	18147137	GAA	GA	intron_variant	KITLG
Indels	5	18147172	GA	G	intron_variant	KITLG
Indels	5	18148378	C	CCT	intron_variant	KITLG
Indels	5	18148912	T	TACA	intron_variant	KITLG
Indels	5	18149062	CACA	C	intron_variant	KITLG
Indels	5	18150791	GCCTT	G	intron_variant	KITLG
Indels	5	18150795	T	TAAGG	intron_variant	KITLG
Indels	5	18150816	C	CA	intron_variant	KITLG
Indels	5	18152523	G	GTGTAAA	upstream_gene_variant	KITLG
Indels	5	18153055	A	AT	upstream_gene_variant	KITLG
Indels	5	18154859	AAAT	A	upstream_gene_variant	KITLG
Indels	5	18157924	G	GC	intergenic_region	KITLG-DUSP6
Indels	5	18158957	G	GA	intergenic_region	KITLG-DUSP6
Indels	5	18159740	ATT	A	intergenic_region	KITLG-DUSP6
Indels	5	18160405	AT	A	intergenic_region	KITLG-DUSP6
Indels	5	18160497	TAC	T	intergenic_region	KITLG-DUSP6
Indels	5	18161494	TA	T	intergenic_region	KITLG-DUSP6
Indels	5	18165741	TA	T	intergenic_region	KITLG-DUSP6
Indels	5	18165744	AAAATGTAT	A	intergenic_region	KITLG-DUSP6
Indels	5	18166989	GC	G	intergenic_region	KITLG-DUSP6
Indels	5	18167126	TG	T	intergenic_region	KITLG-DUSP6
Indels	5	18167796	CA	C	intergenic_region	KITLG-DUSP6
Indels	5	18169048	A	AATAG	intergenic_region	KITLG-DUSP6
Indels	5	18169331	T	TC	intergenic_region	KITLG-DUSP6
Indels	5	18170149	AATGGAAACAGTGACAGACTT	A	intergenic_region	KITLG-DUSP6
Indels	5	18170308	TG	T	intergenic_region	KITLG-DUSP6
Indels	5	18170712	ATG	A	intergenic_region	KITLG-DUSP6
Indels	5	18170716	CT	C	intergenic_region	KITLG-DUSP6
Indels	5	18170719	G	GT	intergenic_region	KITLG-DUSP6
Indels	5	18172607	TACACA	T	intergenic_region	KITLG-DUSP6
Indels	5	18172613	GGGTA	G	intergenic_region	KITLG-DUSP6
Indels	5	18173617	GA	G	intergenic_region	KITLG-DUSP6
Indels	5	18175242	A	ACAG	intergenic_region	KITLG-DUSP6
Indels	5	18175308	C	CCAGA	intergenic_region	KITLG-DUSP6
Indels	5	18175993	AG	A	intergenic_region	KITLG-DUSP6
Indels	5	18176800	C	CT	intergenic_region	KITLG-DUSP6
Indels	5	18177832	GGGACTCAAACCCAGCCAAAACCCTGCTTGGGACTTGAACCCACGTGGTTT	G	intergenic_region	KITLG-DUSP6
Indels	5	18178235	G	GACAC	intergenic_region	KITLG-DUSP6
Indels	5	18178508	AT	A	intergenic_region	KITLG-DUSP6
Indels	5	18178551	CATA	C	intergenic_region	KITLG-DUSP6
Indels	5	18178911	A	AGTTGAAC	intergenic_region	KITLG-DUSP6
Indels	5	18179082	TC	T	intergenic_region	KITLG-DUSP6
Indels	5	18179309	C	CT	intergenic_region	KITLG-DUSP6
Indels	5	18179609	C	CCT	intergenic_region	KITLG-DUSP6

## Sheet: S12-4
Table S12-4 Summary of SNVs in the selection signal encompassing ASIP in Jintang Black goats
Types of SNVs	CHR	POS	REF	ALT	Region	Gene
SNPs	13	63244784	G	A	intron_variant	ASIP
SNPs	13	63246317	T	G	intron_variant	ASIP
SNPs	13	63246520	C	T	intron_variant	ASIP
SNPs	13	63247390	C	T	intron_variant	ASIP
SNPs	13	63247713	C	T	intron_variant	ASIP
SNPs	13	63248001	T	C	intron_variant	ASIP
SNPs	13	63248215	A	C	intron_variant	ASIP
SNPs	13	63248396	C	A	intron_variant	ASIP
SNPs	13	63248611	T	C	intron_variant	ASIP
SNPs	13	63248984	T	C	intron_variant	ASIP
SNPs	13	63248986	G	A	intron_variant	ASIP
SNPs	13	63249094	A	G	intron_variant	ASIP
SNPs	13	63249342	G	T	missense_variant	ASIP
Indels	13	63247399	C	CAT	intron_variant	ASIP
Indels	13	63247658	CTT	C	intron_variant	ASIP
Indels	13	63248763	AAGG	A	intron_variant	ASIP
